# Supplementary material for: The DIONESUS algorithm provides scalable and accurate reconstruction of dynamic phosphoproteomic networks to reveal new drug targets
Source: Royal Society of Chemistry journal article supplement (doi:10.1039/c5ib00065c), 2015-01-01
Supplement: c5ib00065c2.xlsx [file c5ib00065c2.xlsx]

## Sheet: Sheet1
Supplementary Table 1: Cue summary
	Experiment #	Growth Factor	Growth Factor Concentration	Reported GF Targets	Inhibitor	Inhibitor Concentration	Reported Inhibitor Targets
	1	Media-only
	1	EGF	200 ng/mL	EGFR
	1	EGF200+Insulin	200 ng/mL,200 ng/mL	EGFR, Insulin R, IGFR
	1	HGF	200 ng/mL	c-Met
	1	HGF200+Insulin	200 ng/mL,200 ng/mL	c-Met, Insulin R, IGFR
	1	Insulin	200 ng/mL	Insulin R, IGFR
	1	IGF	200 ng/mL	Insulin R, IGFR
	2	Media-only
	2	EGF	200 ng/mL	EGFR
	2	EGF	200 ng/mL	EGFR	PP2	10 uM	Src-family kinases, EGFR, Other kinases
	2	EGF	200 ng/mL	EGFR	U73122	10 uM	PLCG
	2	EGF	200 ng/mL	EGFR	Wortmannin	10 uM	PI3K
	3	Media-only
	3	EGF	200 ng/mL	EGFR
	3	EGF	200 ng/mL	EGFR	Aprotinin	1 ug/mL	Serine Proteases
	3	EGF	200 ng/mL	EGFR	GM6001	25 uM	Matrix Metalloproteases
	3	EGF	200 ng/mL	EGFR	TAPI-1	100 uM	ADAMS/Metalloproteases
	4	Media-only
	4	EGF	200 ng/mL	EGFR
	4	EGF	200 ng/mL	EGFR	CAPE	10 uM	Reactive Oxygen Species, NF-kappa-B, Akt-pathway, P70S6K
	4	EGF	200 ng/mL	EGFR	EGCG*	100 uM	Reactive Oxygen Species, Various Kinases
	4	EGF	200 ng/mL	EGFR	N-Acetylcysteine	30 mM	Reactive Oxygen Species
	5	Media-only
	5	EGF	200 ng/mL	EGFR
	5	EGF	200 ng/mL	EGFR	DPI	25 uM	NADPH Oxidase, Other Oxidases
	5	EGF	200 ng/mL	EGFR	Clostridium Toxin B	2 ng/mL	Rac1
	5	EGF	200 ng/mL	EGFR	PHPS2	20 uM	SHP2, Other Phosphatases
	6	Media-only
	6	EGF	200 ng/mL	EGFR
	6	EGF	200 ng/mL	EGFR	DPI	10 uM	NADPH Oxidase, Other Oxidases
	6	EGF	200 ng/mL	EGFR	PP2	200 nM	Src-family kinases, EGFR, Other kinases
	6	EGF	200 ng/mL	EGFR	EMBPTP1BI	25 uM	PTP1B, Orther Phosphatases
	* EGCG perturbation was excluded from PLSR analysis due to a zero cell viability reading for all replicates
