# Supplementary material for: The DIONESUS algorithm provides scalable and accurate reconstruction of dynamic phosphoproteomic networks to reveal new drug targets
Source: Royal Society of Chemistry journal article supplement (doi:10.1039/c5ib00065c), 2015-01-01
Supplement: c5ib00065c3.xlsx [file c5ib00065c3.xlsx]

## Sheet: x150130_Input_NoNames_TIGRESS_p
Supplementary Table 10. Edge list (TIGRESS)
Parent	Daughter	Scoring Metric (Edge Confidence)
p-EGFR(Y1068)	p-MET(Y1349)	0.692
p-IRS1(S1101)	p-GAB2(S159)	0.554
p-KIT(C-)(Y719)	p-STAT5(Y694)	0.554
p-STAT5(Y694)	p-KIT(C-)(Y719)	0.518
p-CRKL(Y207)	p-CREB(S133)	0.516
p-PKCPAN/G(T514)	p-AKT(S473)	0.514
p-P70S6K(T421/S424)	p-PKCPAN/G(T514)	0.512
p-FOXO3A(S253)	p-CDK2(T160)	0.51
p-S6RIBPROT(S240/244)	p-PKCPAN/G(T514)	0.506
p-SRC(Y527)	p-PTEN(S380)	0.504
p-RAF(C-)(S338)	p-RAF(C-)(S259)	0.498
p-GSK3A(S21)	p-GAB2(S159)	0.492
p-4EBP1(S65)	p-4EBP1(T37/46)	0.482
p-IRS1(S1101)	p-GSK3A(S21)	0.482
p-SHP2(Y542)	p-SAPK/JNK(T183/Y185)	0.468
p-AKT(S473)	p-S6RIBPROT(S240/244)	0.464
p-GSK3A(S21)	p-PDK1(S241)	0.462
p-PKCPAN/G(T514)	p-S6RIBPROT(S240/244)	0.462
p-PKCPAN/G(T514)	p-P70S6K(T421/S424)	0.462
p-CREB(S133)	p-CRKL(Y207)	0.46
p-JAK1(Y1022/1023)	p-ZAP70(Y319)/SYK(Y352)	0.454
p-SRC(Y527)	p-SAPK/JNK(T183/Y185)	0.45
p-AKT(S473)	p-P90RSK(S380)	0.444
p-SAPK/JNK(T183/Y185)	p-PTEN(S380)	0.444
p-AKT(S473)	p-PKCPAN/G(T514)	0.44
p-GAB2(S159)	p-IGF1RB(Y1135/1136)/INSRB	0.438
p-MTOR(S2448)	p-FOXO3A(S253)	0.436
p-CREB(S133)	p-CDK2(T160)	0.434
p-RAF(C-)(S259)	p-ABL(C-)(Y245)	0.426
p-MET(Y1349)	p-EGFR(Y1068)	0.422
p-EGFR(Y1173)	p-EGFR(Y845)	0.422
p-PKCPAN/G(T514)	p-FOXO1(S319)/FOXO4(S262)	0.422
p-PTEN(S380)	p-SAPK/JNK(T183/Y185)	0.42
p-RAF(C-)(S259)	p-RAF(C-)(S338)	0.414
p-FOXO3A(S253)	p-MTOR(S2448)	0.402
p-S6RIBPROT(S240/244)	p-AKT(S473)	0.4
p-SHC(Y239/240)	p-PTEN(S380)	0.4
p-ERK1/2(T202/Y204)	p-MEK(1/2)(S217/221)	0.398
p-IGF1RB(Y1135/1136)/INSRB	p-GAB2(S159)	0.392
p-RAF(C-)(S338)	p-GSK3A(S21)	0.388
p-SAPK/JNK(T183/Y185)	p-SRC(Y527)	0.388
p-P90RSK(S380)	p-AKT(S473)	0.384
p-ABL(C-)(Y245)	p-RAF(C-)(S259)	0.378
p-PLCG1(Y783)	p-EGFR(Y845)	0.376
p-PDGFRA(Y754)	p-IGF1RB(Y1135/1136)/INSRB	0.376
p-GSK3A(S21)	p-IGF1RB(Y1135/1136)/INSRB	0.374
p-4EBP1(T37/46)	p-4EBP1(S65)	0.37
p-CREB(S133)	p-P70S6K(T421/S424)	0.368
p-PTEN(S380)	p-SRC(Y527)	0.366
p-P70S6K(T421/S424)	p-CDK2(T160)	0.362
p-EGFR(Y1173)	p-EGFR(Y1068)	0.36
p-GSK3A(S21)	p-IRS1(S1101)	0.36
p-EGFR(Y845)	p-PLCG1(Y783)	0.358
p-GAB2(S159)	p-IRS1(S1101)	0.356
p-MEK(1/2)(S217/221)	p-ERK1/2(T202/Y204)	0.354
p-PYK2(Y402)	p-SRC(Y416)	0.354
p-SRC(Y527)	p-SHC(Y239/240)	0.34
p-FOXO3A(S253)	p-CRKL(Y207)	0.338
p-PDGFRA(Y754)	p-4EBP1(S65)	0.338
p-MTOR(S2448)	p-P38MAPK(T180/Y182)	0.336
p-PDGFRB(Y1009)	p-STAT3(S727)	0.336
p-STAT3(S727)	p-SHC(Y239/240)	0.332
p-SYK(Y525/526)	p-MET(Y1234/1235)	0.33
p-RAF(C-)(S259)	p-GSK3A(S21)	0.33
p-SHC(Y239/240)	p-SRC(Y527)	0.33
p-GSK3A(S21)	p-RAF(C-)(S338)	0.328
p-STAT1(Y701)	p-JAK1(Y1022/1023)	0.326
p-PKCD(T505)	p-PDK1(S241)	0.326
p-IRS1(S1101)	p-IGF1RB(Y1135/1136)/INSRB	0.322
p-P38MAPK(T180/Y182)	p-MTOR(S2448)	0.32
p-EGFR(Y845)	p-MET(Y1234/1235)	0.32
p-FAK(Y576/577)	p-ABL(C-)(Y245)	0.318
p-MET(Y1234/1235)	p-SYK(Y525/526)	0.318
p-PDGFRB(Y1009)	p-PTEN(S380)	0.31
p-CRKL(Y207)	p-FOXO3A(S253)	0.306
p-PKCD(T505)	p-P90RSK(S380)	0.306
p-CDK2(T160)	p-P70S6K(T421/S424)	0.306
p-EGFR(Y845)	p-SRC(Y416)	0.306
p-SRC(Y527)	p-4EBP1(T37/46)	0.304
p-FOXO3A(S253)	p-STAT3(S727)	0.304
p-JAK1(Y1022/1023)	p-ERBB4(Y1284)	0.302
p-ZAP70(Y319)/SYK(Y352)	p-JAK1(Y1022/1023)	0.302
p-CRKII(Y221)	p-FOXO1(S319)/FOXO4(S262)	0.3
p-P38MAPK(T180/Y182)	p-FOXO3A(S253)	0.3
p-GSK3A(S21)	p-RAF(C-)(S259)	0.3
p-JAK1(Y1022/1023)	p-STAT1(Y701)	0.3
p-PDFGRA(Y849)/PDGFRB(Y857)	p-PYK2(Y402)	0.298
p-STAT1(Y701)	p-STAT5(Y694)	0.298
p-CDK2(T160)	p-FOXO3A(S253)	0.296
p-SHC(Y239/240)	p-STAT3(S727)	0.296
p-P70S6K(T421/S424)	p-CREB(S133)	0.294
p-GAB2(S159)	p-GSK3A(S21)	0.294
p-PYK2(Y402)	p-PDFGRA(Y849)/PDGFRB(Y857)	0.292
p-SHP2(Y542)	p-PDGFRB(Y1009)	0.292
p-MET(Y1234/1235)	p-PLCG1(Y783)	0.292
p-PTEN(S380)	p-SHC(Y239/240)	0.292
p-ZAP70(Y319)/SYK(Y352)	p-STAT3(Y705)	0.292
p-EGFR(Y1086)	p-EGFR(Y1068)	0.29
p-FOXO3A(S253)	p-IRS1(S1101)	0.29
p-FGFR1(Y653/654)	p-EGFR(Y1086)	0.286
p-MET(Y1234/1235)	p-EGFR(Y845)	0.284
p-CRKL(Y207)	p-CDK2(T160)	0.284
p-SHP2(Y542)	p-4EBP1(T37/46)	0.282
p-STAT5(Y694)	p-STAT1(Y701)	0.282
p-PI3KP85(Y458)P55(Y199)	p-CREB(S133)	0.28
p-CDK2(T160)	p-PDK1(S241)	0.28
p-STAT3(Y705)	p-FAK(Y576/577)	0.28
p-SRC(Y416)	p-PYK2(Y402)	0.28
p-EGFR(Y1086)	p-STAT5(Y694)	0.278
p-FAK(Y576/577)	p-MTOR(S2448)	0.278
p-RAF(C-)(S259)	p-IRS1(S1101)	0.278
p-EGFR(Y1068)	p-EGFR(Y1173)	0.276
p-EGFR(Y845)	p-EGFR(Y1173)	0.276
p-P38MAPK(T180/Y182)	p-MEK(1/2)(S217/221)	0.276
p-SHC(Y239/240)	p-SAPK/JNK(T183/Y185)	0.276
p-MET(Y1234/1235)	p-PLCG2(Y759)	0.276
p-PI3KP85(Y458)P55(Y199)	p-AKT(S473)	0.274
p-PKCD(T505)	p-STAT3(S727)	0.274
p-P38MAPK(T180/Y182)	p-CRKL(Y207)	0.27
p-CRKL(Y207)	p-P38MAPK(T180/Y182)	0.27
p-ERBB2(Y1221/1222)	p-ERBB4(Y1284)	0.266
p-STAT3(S727)	p-FOXO3A(S253)	0.266
p-ERK1/2(T202/Y204)	p-KIT(C-)(Y719)	0.266
p-MTOR(S2448)	p-STAT3(S727)	0.266
p-ERBB2(Y1221/1222)	p-CRKII(Y221)	0.264
p-MEK(1/2)(S217/221)	p-P38MAPK(T180/Y182)	0.264
p-STAT3(Y705)	p-FGFR1(Y653/654)	0.262
p-PDGFRB(Y1009)	p-SHP2(Y542)	0.262
p-PI3KP85(Y458)P55(Y199)	p-CRKL(Y207)	0.26
p-ZAP70(Y319)/SYK(Y352)	p-ERBB4(Y1284)	0.258
p-SAPK/JNK(T183/Y185)	p-SHP2(Y542)	0.258
p-FOXO1(S319)/FOXO4(S262)	p-AKT(S473)	0.256
p-ERBB4(Y1284)	p-FAK(Y576/577)	0.256
p-CRKL(Y207)	p-SRC(Y527)	0.256
p-STAT6(Y641)	p-FGFR1(Y653/654)	0.254
p-PKCD(T505)	p-IRS1(S1101)	0.252
p-PI3KP85(Y458)P55(Y199)	p-S6RIBPROT(S240/244)	0.252
p-EGFR(Y1086)	p-KIT(C-)(Y719)	0.25
p-PDGFRB(Y1009)	p-MEK(1/2)(S217/221)	0.25
p-CRKII(Y221)	p-RAF(C-)(S338)	0.25
p-SAPK/JNK(T183/Y185)	p-SHC(Y239/240)	0.248
p-CDK2(T160)	p-CREB(S133)	0.246
p-PDFGRA(Y849)/PDGFRB(Y857)	p-ERBB4(Y1284)	0.246
p-EGFR(Y1173)	p-MET(Y1234/1235)	0.246
p-P90RSK(S380)	p-IGF1RB(Y1135/1136)/INSRB	0.244
p-FOXO3A(S253)	p-P38MAPK(T180/Y182)	0.244
p-SRC(Y416)	p-EGFR(Y845)	0.242
p-SRC(Y416)	p-EGFR(Y1068)	0.24
p-ERBB4(Y1284)	p-JAK1(Y1022/1023)	0.24
p-4EBP1(S65)	p-PDGFRA(Y754)	0.24
p-ERBB4(Y1284)	p-PDFGRA(Y849)/PDGFRB(Y857)	0.238
p-ERBB2(Y1221/1222)	p-SYK(Y525/526)	0.238
p-PLCG1(Y783)	p-SYK(Y525/526)	0.238
p-STAT3(Y705)	p-ABL(C-)(Y245)	0.234
p-FOXO3A(S253)	p-CREB(S133)	0.234
p-CRKII(Y221)	p-ERBB2(Y1221/1222)	0.234
p-CDK2(T160)	p-CRKL(Y207)	0.232
p-PDGFRA(Y754)	p-CDC2(Y15)	0.23
p-AKT(S473)	p-FOXO1(S319)/FOXO4(S262)	0.23
p-IGF1RB(Y1135/1136)/INSRB	p-GSK3A(S21)	0.23
p-PTEN(S380)	p-PDGFRB(Y1009)	0.23
p-CREB(S133)	p-PLCG1(Y783)	0.23
p-MET(Y1234/1235)	p-EGFR(Y1173)	0.228
p-STAT1(Y701)	p-PDFGRA(Y849)/PDGFRB(Y857)	0.228
p-CDC2(Y15)	p-PKCD(T505)	0.228
p-SYK(Y525/526)	p-PYK2(Y402)	0.228
p-GAB2(S159)	p-MET(Y1349)	0.226
p-JAK1(Y1022/1023)	p-PDFGRA(Y849)/PDGFRB(Y857)	0.226
p-PDGFRA(Y754)	p-ERK1/2(T202/Y204)	0.226
p-STAT6(Y641)	p-ERBB2(Y1221/1222)	0.224
p-SAPK/JNK(T183/Y185)	p-GAB2(S159)	0.224
p-FAK(Y576/577)	p-STAT3(Y705)	0.224
p-EGFR(Y1068)	p-EGFR(Y1086)	0.222
p-SYK(Y525/526)	p-ERBB2(Y1221/1222)	0.222
p-PI3KP85(Y458)P55(Y199)	p-P38MAPK(T180/Y182)	0.222
p-GAB1(Y627)	p-PYK2(Y402)	0.222
p-EGFR(Y1068)	p-4EBP1(T37/46)	0.22
p-PKCD(T505)	p-PDGFRA(Y754)	0.22
p-FOXO3A(S253)	p-PDK1(S241)	0.22
p-KIT(C-)(Y719)	p-PLCG2(Y759)	0.22
p-PYK2(Y402)	p-SHP2(Y542)	0.22
p-AKT(S473)	p-P70S6K(T421/S424)	0.22
p-PLCG1(Y783)	p-CREB(S133)	0.218
p-PDGFRA(Y754)	p-JAK1(Y1022/1023)	0.218
p-EGFR(Y845)	p-EGFR(Y1068)	0.216
p-JAK1(Y1022/1023)	p-4EBP1(S65)	0.216
p-CREB(S133)	p-FOXO3A(S253)	0.216
p-SHP2(Y542)	p-GAB1(Y627)	0.216
p-CDK2(T160)	p-P38MAPK(T180/Y182)	0.216
p-STAT6(Y641)	p-PLCG2(Y759)	0.216
p-ERBB2(Y1221/1222)	p-STAT6(Y641)	0.216
p-SYK(Y525/526)	p-EGFR(Y845)	0.214
p-EGFR(Y1086)	p-PDGFRA(Y754)	0.214
p-PI3KP85(Y458)P55(Y199)	p-PDGFRB(Y1009)	0.214
p-PLCG1(Y783)	p-PI3KP85(Y458)P55(Y199)	0.214
p-S6RIBPROT(S240/244)	p-PI3KP85(Y458)P55(Y199)	0.214
p-FAK(Y576/577)	p-PLCG2(Y759)	0.214
p-STAT6(Y641)	p-PYK2(Y402)	0.214
p-EGFR(Y1086)	p-STAT1(Y701)	0.214
p-FGFR1(Y653/654)	p-STAT3(Y705)	0.214
p-STAT3(Y705)	p-ZAP70(Y319)/SYK(Y352)	0.214
p-FGFR1(Y653/654)	p-FAK(Y576/577)	0.212
p-PLCG2(Y759)	p-FAK(Y576/577)	0.212
p-SYK(Y525/526)	p-STAT6(Y641)	0.212
p-PLCG2(Y759)	p-FGFR1(Y653/654)	0.21
p-FOXO1(S319)/FOXO4(S262)	p-PKCPAN/G(T514)	0.21
p-P38MAPK(T180/Y182)	p-SRC(Y527)	0.21
p-STAT3(Y705)	p-ERBB4(Y1284)	0.208
p-GAB2(S159)	p-FOXO1(S319)/FOXO4(S262)	0.208
p-PDGFRA(Y754)	p-IRS1(S1101)	0.208
p-EGFR(Y1086)	p-ERK1/2(T202/Y204)	0.208
p-PI3KP85(Y458)P55(Y199)	p-PKCPAN/G(T514)	0.208
p-P38MAPK(T180/Y182)	p-SHC(Y239/240)	0.208
p-4EBP1(S65)	p-STAT5(Y694)	0.208
p-FAK(Y576/577)	p-ERBB4(Y1284)	0.206
p-STAT3(Y705)	p-STAT6(Y641)	0.206
p-SHC(Y239/240)	p-CDC2(Y15)	0.204
p-STAT6(Y641)	p-EGFR(Y1086)	0.204
p-PLCG2(Y759)	p-PLCG1(Y783)	0.204
p-PKCD(T505)	p-RAF(C-)(S338)	0.204
p-PYK2(Y402)	p-SYK(Y525/526)	0.204
p-GAB2(S159)	p-4EBP1(S65)	0.202
p-PLCG2(Y759)	p-KIT(C-)(Y719)	0.202
p-P90RSK(S380)	p-SAPK/JNK(T183/Y185)	0.202
p-PLCG1(Y783)	p-MET(Y1234/1235)	0.202
p-PDGFRB(Y1009)	p-SHC(Y239/240)	0.202
p-SYK(Y525/526)	p-SRC(Y416)	0.202
p-PDFGRA(Y849)/PDGFRB(Y857)	p-STAT1(Y701)	0.202
p-PLCG2(Y759)	p-EGFR(Y1173)	0.2
p-STAT5(Y694)	p-4EBP1(T37/46)	0.2
p-SYK(Y525/526)	p-PLCG1(Y783)	0.2
p-RAF(C-)(S338)	p-CRKII(Y221)	0.198
p-FGFR1(Y653/654)	p-KIT(C-)(Y719)	0.198
p-GAB1(Y627)	p-FOXO1(S319)/FOXO4(S262)	0.196
p-STAT3(Y705)	p-JAK1(Y1022/1023)	0.196
p-JAK1(Y1022/1023)	p-PDGFRA(Y754)	0.196
p-SHC(Y239/240)	p-PDGFRB(Y1009)	0.196
p-CREB(S133)	p-PI3KP85(Y458)P55(Y199)	0.196
p-KIT(C-)(Y719)	p-FAK(Y576/577)	0.196
p-EGFR(Y1086)	p-FGFR1(Y653/654)	0.194
p-PTEN(S380)	p-MEK(1/2)(S217/221)	0.194
p-PLCG2(Y759)	p-MET(Y1234/1235)	0.194
p-PDGFRB(Y1009)	p-SRC(Y527)	0.194
p-EGFR(Y1086)	p-STAT6(Y641)	0.194
p-ERBB4(Y1284)	p-ERBB2(Y1221/1222)	0.192
p-FAK(Y576/577)	p-FGFR1(Y653/654)	0.192
p-JAK1(Y1022/1023)	p-IGF1RB(Y1135/1136)/INSRB	0.192
p-SHC(Y239/240)	p-P38MAPK(T180/Y182)	0.192
p-PDGFRB(Y1009)	p-PI3KP85(Y458)P55(Y199)	0.192
p-PLCG1(Y783)	p-PLCG2(Y759)	0.192
p-PYK2(Y402)	p-STAT6(Y641)	0.192
p-EGFR(Y845)	p-GAB1(Y627)	0.19
p-ERBB2(Y1221/1222)	p-MET(Y1234/1235)	0.19
p-PI3KP85(Y458)P55(Y199)	p-P70S6K(T421/S424)	0.19
p-EGFR(Y1068)	p-SRC(Y416)	0.19
p-ERBB4(Y1284)	p-ABL(C-)(Y245)	0.188
p-STAT6(Y641)	p-ERBB4(Y1284)	0.188
p-SRC(Y416)	p-FOXO1(S319)/FOXO4(S262)	0.188
p-IRS1(S1101)	p-FOXO3A(S253)	0.188
p-SHP2(Y542)	p-GAB2(S159)	0.188
p-PKCD(T505)	p-IGF1RB(Y1135/1136)/INSRB	0.188
p-SRC(Y416)	p-CRKII(Y221)	0.186
p-PLCG1(Y783)	p-EGFR(Y1173)	0.186
p-SRC(Y416)	p-ERBB2(Y1221/1222)	0.186
p-MET(Y1234/1235)	p-PYK2(Y402)	0.186
p-ERBB4(Y1284)	p-STAT3(Y705)	0.186
p-SYK(Y525/526)	p-STAT3(Y705)	0.186
p-ERK1/2(T202/Y204)	p-CDC2(Y15)	0.184
p-GAB1(Y627)	p-EGFR(Y845)	0.184
p-CRKL(Y207)	p-PDGFRB(Y1009)	0.184
p-STAT3(S727)	p-PDGFRB(Y1009)	0.184
p-CRKL(Y207)	p-PI3KP85(Y458)P55(Y199)	0.184
p-MTOR(S2448)	p-FAK(Y576/577)	0.184
p-MTOR(S2448)	p-SHC(Y239/240)	0.184
p-PKCD(T505)	p-CDC2(Y15)	0.182
p-P90RSK(S380)	p-GAB1(Y627)	0.182
p-IGF1RB(Y1135/1136)/INSRB	p-IRS1(S1101)	0.182
p-SRC(Y527)	p-P38MAPK(T180/Y182)	0.182
p-GAB1(Y627)	p-SHP2(Y542)	0.182
p-SRC(Y416)	p-SYK(Y525/526)	0.182
p-ERBB4(Y1284)	p-ZAP70(Y319)/SYK(Y352)	0.182
p-STAT5(Y694)	p-ABL(C-)(Y245)	0.18
p-MET(Y1234/1235)	p-ERBB2(Y1221/1222)	0.18
p-SYK(Y525/526)	p-FGFR1(Y653/654)	0.18
p-4EBP1(S65)	p-IGF1RB(Y1135/1136)/INSRB	0.18
p-CDC2(Y15)	p-PDGFRA(Y754)	0.18
p-RAF(C-)(S338)	p-PKCD(T505)	0.18
p-PKCPAN/G(T514)	p-P90RSK(S380)	0.18
p-ABL(C-)(Y245)	p-RAF(C-)(S338)	0.178
p-PYK2(Y402)	p-PDGFRB(Y1009)	0.178
p-PYK2(Y402)	p-PLCG2(Y759)	0.178
p-STAT6(Y641)	p-PKCD(T505)	0.178
p-ERBB4(Y1284)	p-RAF(C-)(S338)	0.178
p-PDFGRA(Y849)/PDGFRB(Y857)	p-CDC2(Y15)	0.176
p-P38MAPK(T180/Y182)	p-CDK2(T160)	0.176
p-SRC(Y527)	p-CRKL(Y207)	0.176
p-ABL(C-)(Y245)	p-PTEN(S380)	0.176
p-ERK1/2(T202/Y204)	p-STAT1(Y701)	0.176
p-PDK1(S241)	p-GSK3A(S21)	0.174
p-STAT1(Y701)	p-ERK1/2(T202/Y204)	0.174
p-ERBB2(Y1221/1222)	p-SRC(Y416)	0.174
p-PKCPAN/G(T514)	p-CRKII(Y221)	0.172
p-STAT1(Y701)	p-EGFR(Y1086)	0.172
p-STAT5(Y694)	p-FGFR1(Y653/654)	0.172
p-P90RSK(S380)	p-FOXO1(S319)/FOXO4(S262)	0.172
p-PDFGRA(Y849)/PDGFRB(Y857)	p-JAK1(Y1022/1023)	0.172
p-FGFR1(Y653/654)	p-MET(Y1234/1235)	0.172
p-CDC2(Y15)	p-PDFGRA(Y849)/PDGFRB(Y857)	0.172
p-GSK3A(S21)	p-P90RSK(S380)	0.172
p-CDC2(Y15)	p-STAT5(Y694)	0.172
p-JAK1(Y1022/1023)	p-CDC2(Y15)	0.17
p-KIT(C-)(Y719)	p-ABL(C-)(Y245)	0.17
p-STAT5(Y694)	p-EGFR(Y1086)	0.17
p-CDC2(Y15)	p-4EBP1(S65)	0.17
p-PI3KP85(Y458)P55(Y199)	p-SRC(Y527)	0.17
p-PYK2(Y402)	p-FOXO1(S319)/FOXO4(S262)	0.168
p-ABL(C-)(Y245)	p-SAPK/JNK(T183/Y185)	0.168
p-EGFR(Y1173)	p-MET(Y1349)	0.168
p-AKT(S473)	p-PI3KP85(Y458)P55(Y199)	0.168
p-GSK3A(S21)	p-4EBP1(S65)	0.168
p-PYK2(Y402)	p-GAB1(Y627)	0.168
p-IRS1(S1101)	p-PDK1(S241)	0.168
p-P38MAPK(T180/Y182)	p-PI3KP85(Y458)P55(Y199)	0.168
p-P90RSK(S380)	p-PKCPAN/G(T514)	0.168
p-SHP2(Y542)	p-P90RSK(S380)	0.168
p-RAF(C-)(S338)	p-ABL(C-)(Y245)	0.166
p-ERK1/2(T202/Y204)	p-EGFR(Y1086)	0.166
p-SAPK/JNK(T183/Y185)	p-FOXO1(S319)/FOXO4(S262)	0.166
p-STAT3(S727)	p-MTOR(S2448)	0.166
p-RAF(C-)(S338)	p-PDK1(S241)	0.166
p-IRS1(S1101)	p-RAF(C-)(S259)	0.166
p-EGFR(Y1086)	p-STAT3(Y705)	0.166
p-AKT(S473)	p-CRKII(Y221)	0.164
p-FOXO3A(S253)	p-PKCD(T505)	0.164
p-ABL(C-)(Y245)	p-FAK(Y576/577)	0.164
p-FAK(Y576/577)	p-STAT6(Y641)	0.164
p-CRKII(Y221)	p-AKT(S473)	0.164
p-CREB(S133)	p-MEK(1/2)(S217/221)	0.162
p-SHP2(Y542)	p-ERK1/2(T202/Y204)	0.162
p-PLCG2(Y759)	p-PDGFRB(Y1009)	0.162
p-MET(Y1234/1235)	p-PI3KP85(Y458)P55(Y199)	0.162
p-SHP2(Y542)	p-PYK2(Y402)	0.162
p-PLCG2(Y759)	p-STAT3(Y705)	0.162
p-STAT1(Y701)	p-CDC2(Y15)	0.16
p-PKCPAN/G(T514)	p-CDK2(T160)	0.16
p-PYK2(Y402)	p-ERK1/2(T202/Y204)	0.16
p-ERBB4(Y1284)	p-PLCG2(Y759)	0.16
p-PDGFRA(Y754)	p-PKCD(T505)	0.16
p-PYK2(Y402)	p-STAT1(Y701)	0.16
p-EGFR(Y1173)	p-GAB1(Y627)	0.158
p-FAK(Y576/577)	p-KIT(C-)(Y719)	0.158
p-ERK1/2(T202/Y204)	p-PDGFRA(Y754)	0.158
p-ABL(C-)(Y245)	p-STAT3(Y705)	0.158
p-JAK1(Y1022/1023)	p-STAT3(Y705)	0.158
p-KIT(C-)(Y719)	p-EGFR(Y1086)	0.156
p-FAK(Y576/577)	p-ERBB2(Y1221/1222)	0.156
p-MEK(1/2)(S217/221)	p-MTOR(S2448)	0.156
p-EGFR(Y1068)	p-ERK1/2(T202/Y204)	0.156
p-STAT1(Y701)	p-SRC(Y416)	0.156
p-RAF(C-)(S338)	p-JAK1(Y1022/1023)	0.154
p-FOXO1(S319)/FOXO4(S262)	p-SAPK/JNK(T183/Y185)	0.154
p-ZAP70(Y319)/SYK(Y352)	p-PDGFRA(Y754)	0.154
p-SRC(Y416)	p-PDFGRA(Y849)/PDGFRB(Y857)	0.154
p-EGFR(Y1173)	p-PLCG2(Y759)	0.154
p-PLCG2(Y759)	p-EGFR(Y1086)	0.152
p-EGFR(Y1086)	p-4EBP1(S65)	0.152
p-ERK1/2(T202/Y204)	p-4EBP1(T37/46)	0.152
p-CDC2(Y15)	p-ERK1/2(T202/Y204)	0.152
p-MEK(1/2)(S217/221)	p-PTEN(S380)	0.152
p-ERBB2(Y1221/1222)	p-STAT3(Y705)	0.152
p-STAT3(Y705)	p-MTOR(S2448)	0.15
p-CRKL(Y207)	p-MEK(1/2)(S217/221)	0.15
p-STAT3(Y705)	p-MET(Y1234/1235)	0.15
p-GSK3A(S21)	p-PDGFRA(Y754)	0.15
p-PTEN(S380)	p-SHP2(Y542)	0.15
p-STAT6(Y641)	p-SHP2(Y542)	0.15
p-FOXO3A(S253)	p-RAF(C-)(S259)	0.15
p-MEK(1/2)(S217/221)	p-SHC(Y239/240)	0.15
p-CDK2(T160)	p-SRC(Y527)	0.15
p-EGFR(Y845)	p-SYK(Y525/526)	0.15
p-STAT5(Y694)	p-CDC2(Y15)	0.148
p-P70S6K(T421/S424)	p-PI3KP85(Y458)P55(Y199)	0.148
p-ERBB2(Y1221/1222)	p-FAK(Y576/577)	0.148
p-JAK1(Y1022/1023)	p-RAF(C-)(S338)	0.148
p-MTOR(S2448)	p-CDC2(Y15)	0.146
p-SHC(Y239/240)	p-MTOR(S2448)	0.146
p-CRKL(Y207)	p-P70S6K(T421/S424)	0.146
p-CDC2(Y15)	p-SHC(Y239/240)	0.146
p-SAPK/JNK(T183/Y185)	p-ABL(C-)(Y245)	0.144
p-MET(Y1234/1235)	p-CRKII(Y221)	0.144
p-PYK2(Y402)	p-EGFR(Y1173)	0.144
p-PDGFRA(Y754)	p-4EBP1(T37/46)	0.144
p-CRKII(Y221)	p-GSK3A(S21)	0.144
p-CRKL(Y207)	p-KIT(C-)(Y719)	0.144
p-IRS1(S1101)	p-PDGFRA(Y754)	0.144
p-P70S6K(T421/S424)	p-S6RIBPROT(S240/244)	0.144
p-EGFR(Y1086)	p-ABL(C-)(Y245)	0.142
p-RAF(C-)(S338)	p-CDC2(Y15)	0.142
p-GAB1(Y627)	p-MET(Y1234/1235)	0.142
p-STAT6(Y641)	p-MET(Y1234/1235)	0.142
p-PLCG1(Y783)	p-PDGFRB(Y1009)	0.142
p-IGF1RB(Y1135/1136)/INSRB	p-P90RSK(S380)	0.142
p-ABL(C-)(Y245)	p-STAT5(Y694)	0.142
p-PLCG2(Y759)	p-SYK(Y525/526)	0.142
p-STAT6(Y641)	p-SYK(Y525/526)	0.142
p-ERBB4(Y1284)	p-CDC2(Y15)	0.14
p-S6RIBPROT(S240/244)	p-FOXO1(S319)/FOXO4(S262)	0.14
p-PDFGRA(Y849)/PDGFRB(Y857)	p-ERK1/2(T202/Y204)	0.14
p-SHP2(Y542)	p-STAT1(Y701)	0.14
p-P70S6K(T421/S424)	p-AKT(S473)	0.14
p-STAT1(Y701)	p-4EBP1(S65)	0.14
p-ERBB2(Y1221/1222)	p-FGFR1(Y653/654)	0.14
p-KIT(C-)(Y719)	p-ERK1/2(T202/Y204)	0.14
p-KIT(C-)(Y719)	p-MET(Y1349)	0.14
p-PKCPAN/G(T514)	p-PI3KP85(Y458)P55(Y199)	0.14
p-ERBB4(Y1284)	p-RAF(C-)(S259)	0.14
p-STAT3(Y705)	p-SYK(Y525/526)	0.14
p-ERK1/2(T202/Y204)	p-EGFR(Y1068)	0.138
p-PKCD(T505)	p-FOXO3A(S253)	0.138
p-EGFR(Y1068)	p-PDGFRA(Y754)	0.138
p-FGFR1(Y653/654)	p-STAT6(Y641)	0.138
p-FOXO1(S319)/FOXO4(S262)	p-GAB2(S159)	0.138
p-STAT1(Y701)	p-STAT6(Y641)	0.138
p-FAK(Y576/577)	p-ZAP70(Y319)/SYK(Y352)	0.138
p-PDFGRA(Y849)/PDGFRB(Y857)	p-CRKII(Y221)	0.136
p-JAK1(Y1022/1023)	p-EGFR(Y1086)	0.136
p-RAF(C-)(S259)	p-FOXO3A(S253)	0.136
p-MTOR(S2448)	p-MEK(1/2)(S217/221)	0.136
p-SRC(Y527)	p-PDGFRB(Y1009)	0.136
p-MET(Y1234/1235)	p-STAT3(Y705)	0.136
p-ABL(C-)(Y245)	p-ERBB4(Y1284)	0.136
p-P90RSK(S380)	p-GSK3A(S21)	0.134
p-PDGFRB(Y1009)	p-P38MAPK(T180/Y182)	0.134
p-GAB2(S159)	p-SAPK/JNK(T183/Y185)	0.134
p-PDFGRA(Y849)/PDGFRB(Y857)	p-PKCD(T505)	0.134
p-MET(Y1234/1235)	p-SRC(Y416)	0.134
p-SRC(Y416)	p-STAT1(Y701)	0.134
p-STAT6(Y641)	p-STAT1(Y701)	0.134
p-RAF(C-)(S259)	p-CRKII(Y221)	0.132
p-PDGFRA(Y754)	p-EGFR(Y1068)	0.132
p-PLCG2(Y759)	p-MTOR(S2448)	0.132
p-PKCD(T505)	p-GAB1(Y627)	0.132
p-SRC(Y416)	p-GAB1(Y627)	0.132
p-EGFR(Y1173)	p-PLCG1(Y783)	0.132
p-STAT3(Y705)	p-PLCG1(Y783)	0.132
p-EGFR(Y1086)	p-PLCG2(Y759)	0.132
p-SHP2(Y542)	p-PKCD(T505)	0.132
p-P90RSK(S380)	p-PKCD(T505)	0.132
p-FOXO3A(S253)	p-SHC(Y239/240)	0.132
p-MET(Y1234/1235)	p-FGFR1(Y653/654)	0.13
p-CDC2(Y15)	p-MTOR(S2448)	0.13
p-CREB(S133)	p-PDGFRB(Y1009)	0.13
p-CRKII(Y221)	p-PKCPAN/G(T514)	0.13
p-FGFR1(Y653/654)	p-STAT5(Y694)	0.13
p-PI3KP85(Y458)P55(Y199)	p-CDK2(T160)	0.128
p-MTOR(S2448)	p-CRKL(Y207)	0.128
p-FGFR1(Y653/654)	p-ERBB2(Y1221/1222)	0.128
p-SHC(Y239/240)	p-ERK1/2(T202/Y204)	0.128
p-PYK2(Y402)	p-MET(Y1234/1235)	0.128
p-ERBB2(Y1221/1222)	p-PDFGRA(Y849)/PDGFRB(Y857)	0.128
p-SYK(Y525/526)	p-PI3KP85(Y458)P55(Y199)	0.128
p-GAB1(Y627)	p-PKCD(T505)	0.128
p-CDC2(Y15)	p-SHP2(Y542)	0.128
p-PI3KP85(Y458)P55(Y199)	p-P90RSK(S380)	0.128
p-SRC(Y527)	p-ABL(C-)(Y245)	0.126
p-4EBP1(S65)	p-GSK3A(S21)	0.126
p-PDGFRA(Y754)	p-GSK3A(S21)	0.126
p-PI3KP85(Y458)P55(Y199)	p-GAB1(Y627)	0.124
p-ERK1/2(T202/Y204)	p-PDFGRA(Y849)/PDGFRB(Y857)	0.124
p-FGFR1(Y653/654)	p-PLCG2(Y759)	0.124
p-STAT6(Y641)	p-FAK(Y576/577)	0.124
p-STAT1(Y701)	p-PYK2(Y402)	0.124
p-ERK1/2(T202/Y204)	p-SHP2(Y542)	0.124
p-CREB(S133)	p-S6RIBPROT(S240/244)	0.124
p-S6RIBPROT(S240/244)	p-P70S6K(T421/S424)	0.124
p-PDGFRA(Y754)	p-STAT1(Y701)	0.124
p-STAT6(Y641)	p-ZAP70(Y319)/SYK(Y352)	0.124
p-CRKII(Y221)	p-S6RIBPROT(S240/244)	0.122
p-STAT3(S727)	p-SRC(Y527)	0.122
p-FOXO3A(S253)	p-FAK(Y576/577)	0.122
p-SYK(Y525/526)	p-ZAP70(Y319)/SYK(Y352)	0.122
p-EGFR(Y1086)	p-GAB1(Y627)	0.12
p-PI3KP85(Y458)P55(Y199)	p-MEK(1/2)(S217/221)	0.12
p-CRKII(Y221)	p-SRC(Y416)	0.12
p-CRKII(Y221)	p-PI3KP85(Y458)P55(Y199)	0.118
p-ABL(C-)(Y245)	p-ERBB2(Y1221/1222)	0.118
p-PDGFRB(Y1009)	p-GAB1(Y627)	0.118
p-GAB1(Y627)	p-P90RSK(S380)	0.118
p-IRS1(S1101)	p-STAT3(S727)	0.118
p-STAT6(Y641)	p-STAT3(Y705)	0.118
p-STAT5(Y694)	p-4EBP1(S65)	0.116
p-STAT1(Y701)	p-SHP2(Y542)	0.116
p-RAF(C-)(S259)	p-STAT3(S727)	0.116
p-STAT6(Y641)	p-CDC2(Y15)	0.114
p-PLCG2(Y759)	p-CRKL(Y207)	0.114
p-EGFR(Y1086)	p-JAK1(Y1022/1023)	0.114
p-IRS1(S1101)	p-PKCD(T505)	0.114
p-PLCG2(Y759)	p-ZAP70(Y319)/SYK(Y352)	0.114
p-MEK(1/2)(S217/221)	p-4EBP1(S65)	0.114
p-STAT3(Y705)	p-RAF(C-)(S338)	0.114
p-FGFR1(Y653/654)	p-STAT1(Y701)	0.114
p-EGFR(Y845)	p-CRKII(Y221)	0.112
p-IRS1(S1101)	p-FOXO1(S319)/FOXO4(S262)	0.112
p-SRC(Y527)	p-PKCPAN/G(T514)	0.112
p-SHP2(Y542)	p-PTEN(S380)	0.112
p-EGFR(Y1086)	p-FAK(Y576/577)	0.112
p-P38MAPK(T180/Y182)	p-FAK(Y576/577)	0.112
p-MTOR(S2448)	p-RAF(C-)(S259)	0.112
p-CDC2(Y15)	p-RAF(C-)(S338)	0.112
p-P38MAPK(T180/Y182)	p-S6RIBPROT(S240/244)	0.112
p-PLCG1(Y783)	p-P70S6K(T421/S424)	0.112
p-GAB1(Y627)	p-SRC(Y416)	0.112
p-KIT(C-)(Y719)	p-FGFR1(Y653/654)	0.112
p-SRC(Y416)	p-MET(Y1234/1235)	0.112
p-KIT(C-)(Y719)	p-EGFR(Y1068)	0.11
p-GAB1(Y627)	p-EGFR(Y1173)	0.11
p-MET(Y1349)	p-EGFR(Y1173)	0.11
p-CRKII(Y221)	p-EGFR(Y845)	0.11
p-STAT1(Y701)	p-4EBP1(T37/46)	0.11
p-RAF(C-)(S338)	p-ERBB4(Y1284)	0.11
p-FGFR1(Y653/654)	p-GAB1(Y627)	0.11
p-STAT3(S727)	p-IRS1(S1101)	0.11
p-STAT6(Y641)	p-PDFGRA(Y849)/PDGFRB(Y857)	0.11
p-ERBB2(Y1221/1222)	p-RAF(C-)(S338)	0.11
p-IRS1(S1101)	p-P90RSK(S380)	0.11
p-ERBB4(Y1284)	p-STAT1(Y701)	0.11
p-PKCD(T505)	p-STAT6(Y641)	0.11
p-FAK(Y576/577)	p-SYK(Y525/526)	0.11
p-FGFR1(Y653/654)	p-EGFR(Y1173)	0.108
p-STAT6(Y641)	p-EGFR(Y1173)	0.108
p-PKCD(T505)	p-GSK3A(S21)	0.108
p-P38MAPK(T180/Y182)	p-PDGFRB(Y1009)	0.108
p-PI3KP85(Y458)P55(Y199)	p-PLCG1(Y783)	0.108
p-PDFGRA(Y849)/PDGFRB(Y857)	p-RAF(C-)(S338)	0.108
p-CRKII(Y221)	p-P70S6K(T421/S424)	0.108
p-PDFGRA(Y849)/PDGFRB(Y857)	p-SRC(Y416)	0.108
p-ZAP70(Y319)/SYK(Y352)	p-STAT1(Y701)	0.108
p-CREB(S133)	p-STAT3(S727)	0.108
p-GSK3A(S21)	p-CRKII(Y221)	0.106
p-EGFR(Y1068)	p-EGFR(Y845)	0.106
p-STAT6(Y641)	p-GAB1(Y627)	0.106
p-GSK3A(S21)	p-JAK1(Y1022/1023)	0.106
p-STAT6(Y641)	p-JAK1(Y1022/1023)	0.106
p-PYK2(Y402)	p-PKCD(T505)	0.106
p-STAT3(S727)	p-PKCD(T505)	0.106
p-ZAP70(Y319)/SYK(Y352)	p-FAK(Y576/577)	0.106
p-PLCG1(Y783)	p-STAT3(Y705)	0.106
p-CRKII(Y221)	p-SYK(Y525/526)	0.106
p-CREB(S133)	p-AKT(S473)	0.104
p-P38MAPK(T180/Y182)	p-CREB(S133)	0.104
p-SYK(Y525/526)	p-ERBB4(Y1284)	0.104
p-GAB1(Y627)	p-MET(Y1349)	0.104
p-RAF(C-)(S259)	p-PDK1(S241)	0.104
p-CDK2(T160)	p-PKCPAN/G(T514)	0.104
p-FAK(Y576/577)	p-RAF(C-)(S259)	0.104
p-PLCG1(Y783)	p-S6RIBPROT(S240/244)	0.104
p-SAPK/JNK(T183/Y185)	p-P90RSK(S380)	0.104
p-EGFR(Y1086)	p-CDC2(Y15)	0.102
p-PYK2(Y402)	p-CRKII(Y221)	0.102
p-SRC(Y416)	p-EGFR(Y1173)	0.102
p-SAPK/JNK(T183/Y185)	p-4EBP1(T37/46)	0.102
p-RAF(C-)(S338)	p-ERBB2(Y1221/1222)	0.102
p-EGFR(Y1173)	p-FGFR1(Y653/654)	0.102
p-MTOR(S2448)	p-IRS1(S1101)	0.102
p-JAK1(Y1022/1023)	p-IRS1(S1101)	0.102
p-RAF(C-)(S338)	p-IRS1(S1101)	0.102
p-STAT3(S727)	p-PDGFRA(Y754)	0.102
p-RAF(C-)(S259)	p-PTEN(S380)	0.102
p-EGFR(Y1086)	p-PYK2(Y402)	0.102
p-4EBP1(T37/46)	p-SHP2(Y542)	0.102
p-PKCD(T505)	p-SHP2(Y542)	0.102
p-P38MAPK(T180/Y182)	p-STAT3(S727)	0.102
p-JAK1(Y1022/1023)	p-CRKII(Y221)	0.1
p-RAF(C-)(S259)	p-ERBB2(Y1221/1222)	0.1
p-SRC(Y527)	p-SHP2(Y542)	0.1
p-RAF(C-)(S338)	p-P70S6K(T421/S424)	0.1
p-STAT1(Y701)	p-ABL(C-)(Y245)	0.098
p-PKCD(T505)	p-CRKII(Y221)	0.098
p-FGFR1(Y653/654)	p-EGFR(Y1068)	0.098
p-PYK2(Y402)	p-EGFR(Y1086)	0.098
p-IGF1RB(Y1135/1136)/INSRB	p-4EBP1(S65)	0.098
p-P38MAPK(T180/Y182)	p-4EBP1(S65)	0.098
p-GSK3A(S21)	p-MET(Y1349)	0.098
p-MET(Y1234/1235)	p-PDFGRA(Y849)/PDGFRB(Y857)	0.098
p-ERBB2(Y1221/1222)	p-PLCG2(Y759)	0.098
p-PDGFRB(Y1009)	p-PKCD(T505)	0.098
p-PDFGRA(Y849)/PDGFRB(Y857)	p-SHP2(Y542)	0.098
p-CRKII(Y221)	p-RAF(C-)(S259)	0.098
p-ZAP70(Y319)/SYK(Y352)	p-RAF(C-)(S338)	0.098
p-S6RIBPROT(S240/244)	p-P90RSK(S380)	0.098
p-ERK1/2(T202/Y204)	p-SHC(Y239/240)	0.098
p-EGFR(Y1086)	p-SRC(Y416)	0.098
p-ZAP70(Y319)/SYK(Y352)	p-STAT6(Y641)	0.098
p-4EBP1(S65)	p-CDC2(Y15)	0.096
p-CDC2(Y15)	p-EGFR(Y1086)	0.096
p-ERBB4(Y1284)	p-EGFR(Y1086)	0.096
p-EGFR(Y1086)	p-EGFR(Y1173)	0.096
p-JAK1(Y1022/1023)	p-ERBB2(Y1221/1222)	0.096
p-PLCG2(Y759)	p-ERBB2(Y1221/1222)	0.096
p-STAT1(Y701)	p-FGFR1(Y653/654)	0.096
p-SRC(Y416)	p-MET(Y1349)	0.096
p-CRKII(Y221)	p-PDFGRA(Y849)/PDGFRB(Y857)	0.096
p-KIT(C-)(Y719)	p-PDK1(S241)	0.096
p-FOXO3A(S253)	p-PI3KP85(Y458)P55(Y199)	0.096
p-GAB1(Y627)	p-PI3KP85(Y458)P55(Y199)	0.096
p-CRKL(Y207)	p-PLCG1(Y783)	0.096
p-PDGFRB(Y1009)	p-PLCG1(Y783)	0.096
p-STAT3(Y705)	p-PLCG2(Y759)	0.096
p-ERBB2(Y1221/1222)	p-RAF(C-)(S259)	0.096
p-PDGFRA(Y754)	p-SHC(Y239/240)	0.096
p-SHP2(Y542)	p-SRC(Y527)	0.096
p-4EBP1(S65)	p-STAT1(Y701)	0.096
p-SRC(Y527)	p-STAT3(S727)	0.096
p-PDFGRA(Y849)/PDGFRB(Y857)	p-ZAP70(Y319)/SYK(Y352)	0.096
p-STAT3(S727)	p-CDC2(Y15)	0.094
p-PDGFRB(Y1009)	p-CREB(S133)	0.094
p-PLCG1(Y783)	p-FGFR1(Y653/654)	0.094
p-CRKII(Y221)	p-GAB1(Y627)	0.094
p-PLCG1(Y783)	p-GAB1(Y627)	0.094
p-MTOR(S2448)	p-KIT(C-)(Y719)	0.094
p-MTOR(S2448)	p-ERK1/2(T202/Y204)	0.094
p-MEK(1/2)(S217/221)	p-PDGFRB(Y1009)	0.094
p-EGFR(Y845)	p-PYK2(Y402)	0.094
p-FOXO3A(S253)	p-SRC(Y527)	0.094
p-EGFR(Y845)	p-ZAP70(Y319)/SYK(Y352)	0.094
p-S6RIBPROT(S240/244)	p-CDK2(T160)	0.092
p-STAT3(Y705)	p-EGFR(Y1068)	0.092
p-STAT3(Y705)	p-EGFR(Y1086)	0.092
p-PDFGRA(Y849)/PDGFRB(Y857)	p-EGFR(Y1173)	0.092
p-ZAP70(Y319)/SYK(Y352)	p-4EBP1(S65)	0.092
p-SRC(Y416)	p-FGFR1(Y653/654)	0.092
p-PKCD(T505)	p-MEK(1/2)(S217/221)	0.092
p-SHP2(Y542)	p-PDGFRA(Y754)	0.092
p-CRKL(Y207)	p-PDK1(S241)	0.092
p-STAT3(S727)	p-PDK1(S241)	0.092
p-SRC(Y527)	p-PI3KP85(Y458)P55(Y199)	0.092
p-ERK1/2(T202/Y204)	p-PYK2(Y402)	0.092
p-PI3KP85(Y458)P55(Y199)	p-PYK2(Y402)	0.092
p-PLCG2(Y759)	p-STAT6(Y641)	0.092
p-PLCG2(Y759)	p-ABL(C-)(Y245)	0.09
p-FOXO1(S319)/FOXO4(S262)	p-CRKII(Y221)	0.09
p-P90RSK(S380)	p-CRKII(Y221)	0.09
p-PDGFRB(Y1009)	p-CRKL(Y207)	0.09
p-PDFGRA(Y849)/PDGFRB(Y857)	p-ERBB2(Y1221/1222)	0.09
p-PYK2(Y402)	p-ERBB2(Y1221/1222)	0.09
p-CDC2(Y15)	p-ERBB4(Y1284)	0.09
p-PLCG2(Y759)	p-GAB1(Y627)	0.09
p-GAB1(Y627)	p-PDGFRA(Y754)	0.09
p-PLCG2(Y759)	p-PDFGRA(Y849)/PDGFRB(Y857)	0.09
p-PLCG2(Y759)	p-PYK2(Y402)	0.09
p-CDK2(T160)	p-RAF(C-)(S259)	0.09
p-SAPK/JNK(T183/Y185)	p-RAF(C-)(S259)	0.09
p-FGFR1(Y653/654)	p-SRC(Y416)	0.09
p-4EBP1(T37/46)	p-SRC(Y527)	0.09
p-S6RIBPROT(S240/244)	p-PLCG1(Y783)	0.088
p-KIT(C-)(Y719)	p-CRKL(Y207)	0.088
p-PLCG1(Y783)	p-CRKL(Y207)	0.088
p-CRKL(Y207)	p-MET(Y1349)	0.088
p-PDGFRA(Y754)	p-MET(Y1349)	0.088
p-GAB2(S159)	p-PDK1(S241)	0.088
p-AKT(S473)	p-PLCG1(Y783)	0.088
p-PDGFRA(Y754)	p-SHP2(Y542)	0.088
p-CDK2(T160)	p-S6RIBPROT(S240/244)	0.088
p-CRKL(Y207)	p-S6RIBPROT(S240/244)	0.088
p-EGFR(Y1068)	p-SHC(Y239/240)	0.088
p-RAF(C-)(S259)	p-STAT3(Y705)	0.088
p-SHP2(Y542)	p-STAT6(Y641)	0.088
p-GAB1(Y627)	p-PDGFRB(Y1009)	0.086
p-STAT6(Y641)	p-CRKII(Y221)	0.086
p-PDGFRA(Y754)	p-GAB1(Y627)	0.086
p-P38MAPK(T180/Y182)	p-KIT(C-)(Y719)	0.086
p-PKCD(T505)	p-PDFGRA(Y849)/PDGFRB(Y857)	0.086
p-RAF(C-)(S338)	p-PDFGRA(Y849)/PDGFRB(Y857)	0.086
p-ERBB2(Y1221/1222)	p-PI3KP85(Y458)P55(Y199)	0.086
p-SYK(Y525/526)	p-PLCG2(Y759)	0.086
p-JAK1(Y1022/1023)	p-STAT6(Y641)	0.086
p-PDFGRA(Y849)/PDGFRB(Y857)	p-STAT6(Y641)	0.086
p-PI3KP85(Y458)P55(Y199)	p-SYK(Y525/526)	0.086
p-ZAP70(Y319)/SYK(Y352)	p-SYK(Y525/526)	0.086
p-SRC(Y527)	p-MEK(1/2)(S217/221)	0.084
p-STAT3(S727)	p-P38MAPK(T180/Y182)	0.084
p-CDK2(T160)	p-MET(Y1349)	0.084
p-PTEN(S380)	p-STAT3(S727)	0.084
p-STAT1(Y701)	p-ZAP70(Y319)/SYK(Y352)	0.084
p-AKT(S473)	p-CREB(S133)	0.084
p-SYK(Y525/526)	p-CRKII(Y221)	0.084
p-4EBP1(S65)	p-EGFR(Y1086)	0.084
p-PDFGRA(Y849)/PDGFRB(Y857)	p-EGFR(Y1086)	0.084
p-PDGFRA(Y754)	p-EGFR(Y1173)	0.084
p-CRKL(Y207)	p-MTOR(S2448)	0.084
p-ABL(C-)(Y245)	p-KIT(C-)(Y719)	0.084
p-SAPK/JNK(T183/Y185)	p-MEK(1/2)(S217/221)	0.084
p-SAPK/JNK(T183/Y185)	p-PDGFRB(Y1009)	0.084
p-SHP2(Y542)	p-PLCG2(Y759)	0.084
p-GAB1(Y627)	p-CRKL(Y207)	0.082
p-EGFR(Y845)	p-ERBB2(Y1221/1222)	0.082
p-MTOR(S2448)	p-ERBB4(Y1284)	0.082
p-EGFR(Y1068)	p-FGFR1(Y653/654)	0.082
p-SYK(Y525/526)	p-FOXO1(S319)/FOXO4(S262)	0.082
p-SRC(Y416)	p-JAK1(Y1022/1023)	0.082
p-STAT6(Y641)	p-ERK1/2(T202/Y204)	0.082
p-SYK(Y525/526)	p-PDFGRA(Y849)/PDGFRB(Y857)	0.082
p-PDGFRB(Y1009)	p-PLCG2(Y759)	0.082
p-ERBB2(Y1221/1222)	p-PKCD(T505)	0.082
p-EGFR(Y1173)	p-PYK2(Y402)	0.082
p-KIT(C-)(Y719)	p-SHP2(Y542)	0.082
p-PDGFRB(Y1009)	p-S6RIBPROT(S240/244)	0.082
p-SHP2(Y542)	p-SHC(Y239/240)	0.082
p-CDC2(Y15)	p-STAT6(Y641)	0.082
p-PDGFRA(Y754)	p-ZAP70(Y319)/SYK(Y352)	0.082
p-GAB2(S159)	p-AKT(S473)	0.082
p-RAF(C-)(S259)	p-CDK2(T160)	0.082
p-CREB(S133)	p-FAK(Y576/577)	0.082
p-GSK3A(S21)	p-STAT3(S727)	0.082
p-PDK1(S241)	p-CDK2(T160)	0.08
p-STAT1(Y701)	p-CDK2(T160)	0.08
p-EGFR(Y1173)	p-EGFR(Y1086)	0.08
p-MET(Y1234/1235)	p-EGFR(Y1086)	0.08
p-PDGFRA(Y754)	p-EGFR(Y1086)	0.08
p-EGFR(Y1086)	p-ERBB4(Y1284)	0.08
p-PI3KP85(Y458)P55(Y199)	p-FOXO3A(S253)	0.08
p-STAT6(Y641)	p-MTOR(S2448)	0.08
p-ERK1/2(T202/Y204)	p-GAB1(Y627)	0.08
p-ZAP70(Y319)/SYK(Y352)	p-IRS1(S1101)	0.08
p-CRKII(Y221)	p-JAK1(Y1022/1023)	0.08
p-GAB1(Y627)	p-MEK(1/2)(S217/221)	0.08
p-SAPK/JNK(T183/Y185)	p-P38MAPK(T180/Y182)	0.08
p-EGFR(Y1173)	p-PDGFRA(Y754)	0.08
p-CRKII(Y221)	p-PKCD(T505)	0.08
p-MTOR(S2448)	p-PKCD(T505)	0.08
p-CRKII(Y221)	p-PYK2(Y402)	0.08
p-FOXO1(S319)/FOXO4(S262)	p-P90RSK(S380)	0.08
p-CRKII(Y221)	p-STAT6(Y641)	0.08
p-GAB1(Y627)	p-ERK1/2(T202/Y204)	0.08
p-S6RIBPROT(S240/244)	p-CRKII(Y221)	0.078
p-4EBP1(T37/46)	p-EGFR(Y1068)	0.078
p-PLCG2(Y759)	p-EGFR(Y845)	0.078
p-SHC(Y239/240)	p-FOXO3A(S253)	0.078
p-EGFR(Y1086)	p-MTOR(S2448)	0.078
p-CRKL(Y207)	p-GAB1(Y627)	0.078
p-FAK(Y576/577)	p-IRS1(S1101)	0.078
p-SYK(Y525/526)	p-JAK1(Y1022/1023)	0.078
p-MEK(1/2)(S217/221)	p-PI3KP85(Y458)P55(Y199)	0.078
p-CRKII(Y221)	p-PLCG1(Y783)	0.078
p-P90RSK(S380)	p-SHP2(Y542)	0.078
p-RAF(C-)(S259)	p-P70S6K(T421/S424)	0.078
p-MET(Y1349)	p-SHC(Y239/240)	0.078
p-IGF1RB(Y1135/1136)/INSRB	p-AKT(S473)	0.076
p-SHP2(Y542)	p-CDC2(Y15)	0.076
p-ERBB4(Y1284)	p-CRKII(Y221)	0.076
p-SRC(Y416)	p-EGFR(Y1086)	0.076
p-STAT1(Y701)	p-EGFR(Y1173)	0.076
p-ZAP70(Y319)/SYK(Y352)	p-IGF1RB(Y1135/1136)/INSRB	0.076
p-SHC(Y239/240)	p-MEK(1/2)(S217/221)	0.076
p-STAT1(Y701)	p-PDGFRA(Y754)	0.076
p-PYK2(Y402)	p-PI3KP85(Y458)P55(Y199)	0.076
p-PYK2(Y402)	p-PLCG1(Y783)	0.076
p-STAT6(Y641)	p-SRC(Y416)	0.076
p-PKCPAN/G(T514)	p-SRC(Y527)	0.076
p-PDK1(S241)	p-STAT3(S727)	0.076
p-GAB1(Y627)	p-STAT6(Y641)	0.076
p-FGFR1(Y653/654)	p-SYK(Y525/526)	0.076
p-ZAP70(Y319)/SYK(Y352)	p-EGFR(Y1086)	0.074
p-ERK1/2(T202/Y204)	p-EGFR(Y1173)	0.074
p-RAF(C-)(S259)	p-ERBB4(Y1284)	0.074
p-CDC2(Y15)	p-JAK1(Y1022/1023)	0.074
p-IGF1RB(Y1135/1136)/INSRB	p-PDGFRA(Y754)	0.074
p-STAT6(Y641)	p-PDGFRA(Y754)	0.074
p-MTOR(S2448)	p-PLCG2(Y759)	0.074
p-GAB2(S159)	p-PTEN(S380)	0.074
p-GAB1(Y627)	p-SHC(Y239/240)	0.074
p-KIT(C-)(Y719)	p-STAT1(Y701)	0.074
p-EGFR(Y1086)	p-ZAP70(Y319)/SYK(Y352)	0.074
p-4EBP1(S65)	p-ZAP70(Y319)/SYK(Y352)	0.074
p-PDGFRB(Y1009)	p-PYK2(Y402)	0.072
p-SRC(Y527)	p-CDK2(T160)	0.072
p-ERK1/2(T202/Y204)	p-MTOR(S2448)	0.072
p-JAK1(Y1022/1023)	p-GSK3A(S21)	0.072
p-EGFR(Y1086)	p-SHP2(Y542)	0.072
p-RAF(C-)(S338)	p-P90RSK(S380)	0.072
p-EGFR(Y1173)	p-SRC(Y416)	0.072
p-MET(Y1349)	p-SRC(Y416)	0.072
p-P90RSK(S380)	p-SRC(Y527)	0.072
p-CDC2(Y15)	p-STAT1(Y701)	0.072
p-CDC2(Y15)	p-STAT3(S727)	0.072
p-MET(Y1234/1235)	p-ZAP70(Y319)/SYK(Y352)	0.072
p-ZAP70(Y319)/SYK(Y352)	p-FGFR1(Y653/654)	0.07
p-4EBP1(S65)	p-JAK1(Y1022/1023)	0.07
p-RAF(C-)(S259)	p-MET(Y1349)	0.07
p-P90RSK(S380)	p-P70S6K(T421/S424)	0.07
p-FGFR1(Y653/654)	p-ABL(C-)(Y245)	0.07
p-GAB1(Y627)	p-EGFR(Y1068)	0.07
p-PDFGRA(Y849)/PDGFRB(Y857)	p-GAB2(S159)	0.07
p-RAF(C-)(S259)	p-SAPK/JNK(T183/Y185)	0.07
p-CRKL(Y207)	p-PLCG2(Y759)	0.07
p-RAF(C-)(S259)	p-S6RIBPROT(S240/244)	0.07
p-FOXO1(S319)/FOXO4(S262)	p-SRC(Y416)	0.07
p-ERBB2(Y1221/1222)	p-ABL(C-)(Y245)	0.068
p-GAB1(Y627)	p-EGFR(Y1086)	0.068
p-FAK(Y576/577)	p-EGFR(Y1086)	0.068
p-STAT3(Y705)	p-EGFR(Y1173)	0.068
p-PI3KP85(Y458)P55(Y199)	p-ERBB2(Y1221/1222)	0.068
p-PYK2(Y402)	p-GAB2(S159)	0.068
p-RAF(C-)(S259)	p-GAB2(S159)	0.068
p-ERBB2(Y1221/1222)	p-JAK1(Y1022/1023)	0.068
p-FOXO3A(S253)	p-MEK(1/2)(S217/221)	0.068
p-PDGFRB(Y1009)	p-SAPK/JNK(T183/Y185)	0.068
p-4EBP1(T37/46)	p-MET(Y1349)	0.068
p-ERK1/2(T202/Y204)	p-PDK1(S241)	0.068
p-CRKL(Y207)	p-FAK(Y576/577)	0.068
p-ERBB2(Y1221/1222)	p-PYK2(Y402)	0.068
p-ABL(C-)(Y245)	p-P70S6K(T421/S424)	0.068
p-PYK2(Y402)	p-MEK(1/2)(S217/221)	0.068
p-STAT5(Y694)	p-PDK1(S241)	0.068
p-SHC(Y239/240)	p-SHP2(Y542)	0.068
p-PTEN(S380)	p-ABL(C-)(Y245)	0.066
p-S6RIBPROT(S240/244)	p-CREB(S133)	0.066
p-PI3KP85(Y458)P55(Y199)	p-CRKII(Y221)	0.066
p-STAT1(Y701)	p-EGFR(Y1068)	0.066
p-PDGFRB(Y1009)	p-EGFR(Y1173)	0.066
p-PLCG2(Y759)	p-ERBB4(Y1284)	0.066
p-STAT3(Y705)	p-KIT(C-)(Y719)	0.066
p-EGFR(Y845)	p-MEK(1/2)(S217/221)	0.066
p-SHP2(Y542)	p-MEK(1/2)(S217/221)	0.066
p-STAT5(Y694)	p-ERK1/2(T202/Y204)	0.066
p-SHP2(Y542)	p-PDFGRA(Y849)/PDGFRB(Y857)	0.066
p-MEK(1/2)(S217/221)	p-PDK1(S241)	0.066
p-ERBB2(Y1221/1222)	p-PLCG1(Y783)	0.066
p-FGFR1(Y653/654)	p-PLCG1(Y783)	0.066
p-P70S6K(T421/S424)	p-PLCG1(Y783)	0.066
p-STAT3(Y705)	p-PTEN(S380)	0.066
p-JAK1(Y1022/1023)	p-FAK(Y576/577)	0.066
p-STAT5(Y694)	p-SHP2(Y542)	0.066
p-JAK1(Y1022/1023)	p-RAF(C-)(S259)	0.066
p-EGFR(Y1173)	p-SYK(Y525/526)	0.066
p-PDFGRA(Y849)/PDGFRB(Y857)	p-SYK(Y525/526)	0.066
p-RAF(C-)(S338)	p-ZAP70(Y319)/SYK(Y352)	0.066
p-ZAP70(Y319)/SYK(Y352)	p-PDK1(S241)	0.066
p-FOXO1(S319)/FOXO4(S262)	p-SYK(Y525/526)	0.066
p-FAK(Y576/577)	p-CREB(S133)	0.064
p-P70S6K(T421/S424)	p-CRKII(Y221)	0.064
p-CRKL(Y207)	p-4EBP1(T37/46)	0.064
p-STAT3(Y705)	p-ERBB2(Y1221/1222)	0.064
p-FGFR1(Y653/654)	p-ERBB4(Y1284)	0.064
p-PDK1(S241)	p-FOXO3A(S253)	0.064
p-SHC(Y239/240)	p-GAB1(Y627)	0.064
p-PDK1(S241)	p-GAB2(S159)	0.064
p-PKCD(T505)	p-ERK1/2(T202/Y204)	0.064
p-CRKII(Y221)	p-MET(Y1234/1235)	0.064
p-STAT5(Y694)	p-MET(Y1349)	0.064
p-EGFR(Y845)	p-PDGFRB(Y1009)	0.064
p-MTOR(S2448)	p-PDGFRB(Y1009)	0.064
p-KIT(C-)(Y719)	p-PKCPAN/G(T514)	0.064
p-ERBB2(Y1221/1222)	p-PTEN(S380)	0.064
p-PTEN(S380)	p-RAF(C-)(S259)	0.064
p-P90RSK(S380)	p-RAF(C-)(S338)	0.064
p-ERBB2(Y1221/1222)	p-S6RIBPROT(S240/244)	0.064
p-P70S6K(T421/S424)	p-P90RSK(S380)	0.064
p-PDGFRA(Y754)	p-STAT5(Y694)	0.064
p-ERBB4(Y1284)	p-STAT6(Y641)	0.064
p-MET(Y1234/1235)	p-EGFR(Y1068)	0.062
p-KIT(C-)(Y719)	p-EGFR(Y1173)	0.062
p-CRKII(Y221)	p-4EBP1(S65)	0.062
p-EGFR(Y1068)	p-GAB1(Y627)	0.062
p-SYK(Y525/526)	p-GAB1(Y627)	0.062
p-CDC2(Y15)	p-IGF1RB(Y1135/1136)/INSRB	0.062
p-STAT1(Y701)	p-KIT(C-)(Y719)	0.062
p-EGFR(Y1086)	p-MET(Y1234/1235)	0.062
p-STAT5(Y694)	p-PDGFRA(Y754)	0.062
p-CDK2(T160)	p-PI3KP85(Y458)P55(Y199)	0.062
p-STAT6(Y641)	p-RAF(C-)(S338)	0.062
p-PLCG1(Y783)	p-SRC(Y416)	0.062
p-IGF1RB(Y1135/1136)/INSRB	p-STAT3(S727)	0.062
p-SRC(Y416)	p-STAT6(Y641)	0.062
p-GAB1(Y627)	p-SYK(Y525/526)	0.062
p-EGFR(Y1173)	p-ZAP70(Y319)/SYK(Y352)	0.062
p-MET(Y1234/1235)	p-FAK(Y576/577)	0.06
p-GAB2(S159)	p-P90RSK(S380)	0.06
p-JAK1(Y1022/1023)	p-CDK2(T160)	0.06
p-IRS1(S1101)	p-4EBP1(S65)	0.06
p-EGFR(Y1086)	p-4EBP1(T37/46)	0.06
p-GAB1(Y627)	p-4EBP1(T37/46)	0.06
p-STAT1(Y701)	p-ERBB4(Y1284)	0.06
p-SHP2(Y542)	p-MTOR(S2448)	0.06
p-MEK(1/2)(S217/221)	p-GAB1(Y627)	0.06
p-P38MAPK(T180/Y182)	p-GAB2(S159)	0.06
p-PYK2(Y402)	p-JAK1(Y1022/1023)	0.06
p-EGFR(Y1173)	p-KIT(C-)(Y719)	0.06
p-FOXO3A(S253)	p-KIT(C-)(Y719)	0.06
p-CREB(S133)	p-P38MAPK(T180/Y182)	0.06
p-JAK1(Y1022/1023)	p-MET(Y1349)	0.06
p-RAF(C-)(S338)	p-PDGFRA(Y754)	0.06
p-SHC(Y239/240)	p-PDGFRA(Y754)	0.06
p-JAK1(Y1022/1023)	p-PDK1(S241)	0.06
p-PDK1(S241)	p-PKCD(T505)	0.06
p-ERBB4(Y1284)	p-PTEN(S380)	0.06
p-EGFR(Y845)	p-STAT3(Y705)	0.06
p-STAT5(Y694)	p-STAT6(Y641)	0.06
p-MET(Y1234/1235)	p-CREB(S133)	0.058
p-STAT6(Y641)	p-EGFR(Y1068)	0.058
p-PYK2(Y402)	p-EGFR(Y845)	0.058
p-4EBP1(S65)	p-FGFR1(Y653/654)	0.058
p-PDGFRB(Y1009)	p-MTOR(S2448)	0.058
p-EGFR(Y1068)	p-MET(Y1234/1235)	0.058
p-SRC(Y416)	p-PLCG1(Y783)	0.058
p-GSK3A(S21)	p-PKCD(T505)	0.058
p-IGF1RB(Y1135/1136)/INSRB	p-PKCD(T505)	0.058
p-PLCG2(Y759)	p-PKCD(T505)	0.058
p-PYK2(Y402)	p-S6RIBPROT(S240/244)	0.058
p-MEK(1/2)(S217/221)	p-CREB(S133)	0.058
p-CRKII(Y221)	p-ERBB4(Y1284)	0.058
p-MET(Y1234/1235)	p-GAB1(Y627)	0.058
p-FOXO3A(S253)	p-PLCG1(Y783)	0.058
p-STAT5(Y694)	p-PKCPAN/G(T514)	0.058
p-RAF(C-)(S338)	p-S6RIBPROT(S240/244)	0.058
p-CRKL(Y207)	p-STAT3(S727)	0.058
p-MTOR(S2448)	p-STAT6(Y641)	0.058
p-JAK1(Y1022/1023)	p-ABL(C-)(Y245)	0.056
p-STAT5(Y694)	p-EGFR(Y1068)	0.056
p-EGFR(Y1173)	p-ERK1/2(T202/Y204)	0.056
p-FAK(Y576/577)	p-MET(Y1234/1235)	0.056
p-EGFR(Y845)	p-MET(Y1349)	0.056
p-ERBB4(Y1284)	p-PKCD(T505)	0.056
p-PDK1(S241)	p-RAF(C-)(S259)	0.056
p-CREB(S133)	p-P90RSK(S380)	0.056
p-JAK1(Y1022/1023)	p-SRC(Y416)	0.056
p-STAT3(S727)	p-STAT6(Y641)	0.056
p-STAT1(Y701)	p-SYK(Y525/526)	0.056
p-ZAP70(Y319)/SYK(Y352)	p-ERBB2(Y1221/1222)	0.056
p-FGFR1(Y653/654)	p-MTOR(S2448)	0.056
p-EGFR(Y1068)	p-KIT(C-)(Y719)	0.056
p-SYK(Y525/526)	p-EGFR(Y1173)	0.054
p-ZAP70(Y319)/SYK(Y352)	p-EGFR(Y1173)	0.054
p-KIT(C-)(Y719)	p-4EBP1(T37/46)	0.054
p-S6RIBPROT(S240/244)	p-ERBB2(Y1221/1222)	0.054
p-P38MAPK(T180/Y182)	p-FOXO1(S319)/FOXO4(S262)	0.054
p-P70S6K(T421/S424)	p-FOXO1(S319)/FOXO4(S262)	0.054
p-PLCG2(Y759)	p-MEK(1/2)(S217/221)	0.054
p-PKCD(T505)	p-SAPK/JNK(T183/Y185)	0.054
p-STAT3(S727)	p-PDFGRA(Y849)/PDGFRB(Y857)	0.054
p-PKCD(T505)	p-PDGFRB(Y1009)	0.054
p-GAB1(Y627)	p-PLCG2(Y759)	0.054
p-CDK2(T160)	p-FAK(Y576/577)	0.054
p-STAT5(Y694)	p-FAK(Y576/577)	0.054
p-S6RIBPROT(S240/244)	p-RAF(C-)(S338)	0.054
p-PDK1(S241)	p-S6RIBPROT(S240/244)	0.054
p-CRKII(Y221)	p-P90RSK(S380)	0.054
p-PDK1(S241)	p-STAT5(Y694)	0.054
p-PLCG2(Y759)	p-CREB(S133)	0.052
p-P70S6K(T421/S424)	p-CRKL(Y207)	0.052
p-CDK2(T160)	p-4EBP1(S65)	0.052
p-ERK1/2(T202/Y204)	p-GAB2(S159)	0.052
p-STAT1(Y701)	p-IGF1RB(Y1135/1136)/INSRB	0.052
p-PKCD(T505)	p-JAK1(Y1022/1023)	0.052
p-CDC2(Y15)	p-SAPK/JNK(T183/Y185)	0.052
p-MEK(1/2)(S217/221)	p-PLCG2(Y759)	0.052
p-SRC(Y416)	p-SHP2(Y542)	0.052
p-PDGFRA(Y754)	p-STAT3(S727)	0.052
p-EGFR(Y1173)	p-STAT3(Y705)	0.052
p-CDC2(Y15)	p-ABL(C-)(Y245)	0.05
p-S6RIBPROT(S240/244)	p-CRKL(Y207)	0.05
p-FGFR1(Y653/654)	p-EGFR(Y845)	0.05
p-MET(Y1349)	p-EGFR(Y845)	0.05
p-STAT3(Y705)	p-EGFR(Y845)	0.05
p-MET(Y1349)	p-4EBP1(T37/46)	0.05
p-KIT(C-)(Y719)	p-MTOR(S2448)	0.05
p-RAF(C-)(S259)	p-MTOR(S2448)	0.05
p-STAT3(S727)	p-IGF1RB(Y1135/1136)/INSRB	0.05
p-P90RSK(S380)	p-IRS1(S1101)	0.05
p-FGFR1(Y653/654)	p-JAK1(Y1022/1023)	0.05
p-PDFGRA(Y849)/PDGFRB(Y857)	p-PDGFRA(Y754)	0.05
p-ZAP70(Y319)/SYK(Y352)	p-PDFGRA(Y849)/PDGFRB(Y857)	0.05
p-PLCG2(Y759)	p-PI3KP85(Y458)P55(Y199)	0.05
p-CREB(S133)	p-PLCG2(Y759)	0.05
p-ERBB4(Y1284)	p-SHP2(Y542)	0.05
p-PLCG2(Y759)	p-SHP2(Y542)	0.05
p-MET(Y1349)	p-RAF(C-)(S259)	0.05
p-GAB2(S159)	p-P70S6K(T421/S424)	0.05
p-SYK(Y525/526)	p-P70S6K(T421/S424)	0.05
p-EGFR(Y1068)	p-STAT1(Y701)	0.05
p-FOXO3A(S253)	p-STAT3(Y705)	0.05
p-KIT(C-)(Y719)	p-STAT6(Y641)	0.05
p-ERBB4(Y1284)	p-SYK(Y525/526)	0.05
p-GSK3A(S21)	p-ZAP70(Y319)/SYK(Y352)	0.05
p-RAF(C-)(S259)	p-ZAP70(Y319)/SYK(Y352)	0.05
p-GSK3A(S21)	p-AKT(S473)	0.048
p-STAT3(S727)	p-CRKL(Y207)	0.048
p-P70S6K(T421/S424)	p-EGFR(Y845)	0.048
p-RAF(C-)(S338)	p-4EBP1(S65)	0.048
p-EGFR(Y845)	p-FGFR1(Y653/654)	0.048
p-SRC(Y527)	p-FOXO3A(S253)	0.048
p-SRC(Y527)	p-GAB1(Y627)	0.048
p-RAF(C-)(S338)	p-IGF1RB(Y1135/1136)/INSRB	0.048
p-MET(Y1234/1235)	p-MEK(1/2)(S217/221)	0.048
p-GAB2(S159)	p-PDGFRA(Y754)	0.048
p-STAT3(Y705)	p-PDFGRA(Y849)/PDGFRB(Y857)	0.048
p-STAT6(Y641)	p-PLCG1(Y783)	0.048
p-SAPK/JNK(T183/Y185)	p-PKCPAN/G(T514)	0.048
p-MEK(1/2)(S217/221)	p-PKCD(T505)	0.048
p-SYK(Y525/526)	p-RAF(C-)(S338)	0.048
p-ERK1/2(T202/Y204)	p-STAT5(Y694)	0.048
p-MET(Y1234/1235)	p-STAT6(Y641)	0.048
p-IRS1(S1101)	p-ZAP70(Y319)/SYK(Y352)	0.048
p-SRC(Y527)	p-CDC2(Y15)	0.046
p-GAB2(S159)	p-CREB(S133)	0.046
p-CDC2(Y15)	p-CRKII(Y221)	0.046
p-FAK(Y576/577)	p-EGFR(Y1173)	0.046
p-STAT5(Y694)	p-EGFR(Y845)	0.046
p-PTEN(S380)	p-4EBP1(S65)	0.046
p-SHC(Y239/240)	p-4EBP1(S65)	0.046
p-PTEN(S380)	p-4EBP1(T37/46)	0.046
p-CREB(S133)	p-FGFR1(Y653/654)	0.046
p-PYK2(Y402)	p-FGFR1(Y653/654)	0.046
p-EGFR(Y845)	p-FOXO1(S319)/FOXO4(S262)	0.046
p-FAK(Y576/577)	p-FOXO3A(S253)	0.046
p-P90RSK(S380)	p-GAB2(S159)	0.046
p-STAT1(Y701)	p-GAB2(S159)	0.046
p-CDC2(Y15)	p-GSK3A(S21)	0.046
p-CRKL(Y207)	p-IRS1(S1101)	0.046
p-PDK1(S241)	p-IRS1(S1101)	0.046
p-STAT3(Y705)	p-IRS1(S1101)	0.046
p-IGF1RB(Y1135/1136)/INSRB	p-JAK1(Y1022/1023)	0.046
p-PLCG1(Y783)	p-MEK(1/2)(S217/221)	0.046
p-CDC2(Y15)	p-P38MAPK(T180/Y182)	0.046
p-KIT(C-)(Y719)	p-P38MAPK(T180/Y182)	0.046
p-FAK(Y576/577)	p-P38MAPK(T180/Y182)	0.046
p-CDK2(T160)	p-SAPK/JNK(T183/Y185)	0.046
p-ERBB4(Y1284)	p-MET(Y1234/1235)	0.046
p-GAB1(Y627)	p-PDFGRA(Y849)/PDGFRB(Y857)	0.046
p-IGF1RB(Y1135/1136)/INSRB	p-PDK1(S241)	0.046
p-ZAP70(Y319)/SYK(Y352)	p-PLCG2(Y759)	0.046
p-PLCG1(Y783)	p-FAK(Y576/577)	0.046
p-STAT3(Y705)	p-RAF(C-)(S259)	0.046
p-FAK(Y576/577)	p-RAF(C-)(S338)	0.046
p-P90RSK(S380)	p-S6RIBPROT(S240/244)	0.046
p-CRKL(Y207)	p-P90RSK(S380)	0.046
p-FOXO1(S319)/FOXO4(S262)	p-P70S6K(T421/S424)	0.046
p-MET(Y1234/1235)	p-P70S6K(T421/S424)	0.046
p-ABL(C-)(Y245)	p-STAT1(Y701)	0.046
p-RAF(C-)(S338)	p-SYK(Y525/526)	0.046
p-CDC2(Y15)	p-ZAP70(Y319)/SYK(Y352)	0.046
p-KIT(C-)(Y719)	p-AKT(S473)	0.044
p-EGFR(Y845)	p-CREB(S133)	0.044
p-PLCG1(Y783)	p-CRKII(Y221)	0.044
p-P90RSK(S380)	p-CRKL(Y207)	0.044
p-SHP2(Y542)	p-EGFR(Y1086)	0.044
p-ERBB2(Y1221/1222)	p-EGFR(Y845)	0.044
p-RAF(C-)(S259)	p-4EBP1(S65)	0.044
p-JAK1(Y1022/1023)	p-FGFR1(Y653/654)	0.044
p-PLCG1(Y783)	p-FOXO1(S319)/FOXO4(S262)	0.044
p-ABL(C-)(Y245)	p-MTOR(S2448)	0.044
p-ERBB4(Y1284)	p-MTOR(S2448)	0.044
p-PKCPAN/G(T514)	p-P38MAPK(T180/Y182)	0.044
p-S6RIBPROT(S240/244)	p-P38MAPK(T180/Y182)	0.044
p-EGFR(Y845)	p-PDFGRA(Y849)/PDGFRB(Y857)	0.044
p-EGFR(Y1173)	p-PDGFRB(Y1009)	0.044
p-EGFR(Y845)	p-PI3KP85(Y458)P55(Y199)	0.044
p-FOXO1(S319)/FOXO4(S262)	p-PLCG1(Y783)	0.044
p-PKCD(T505)	p-PYK2(Y402)	0.044
p-MEK(1/2)(S217/221)	p-SHP2(Y542)	0.044
p-ZAP70(Y319)/SYK(Y352)	p-RAF(C-)(S259)	0.044
p-PKCD(T505)	p-SHC(Y239/240)	0.044
p-ABL(C-)(Y245)	p-SRC(Y527)	0.044
p-AKT(S473)	p-STAT3(S727)	0.044
p-CRKII(Y221)	p-ZAP70(Y319)/SYK(Y352)	0.044
p-MTOR(S2448)	p-ZAP70(Y319)/SYK(Y352)	0.044
p-STAT5(Y694)	p-ZAP70(Y319)/SYK(Y352)	0.044
p-ERBB4(Y1284)	p-FGFR1(Y653/654)	0.042
p-ABL(C-)(Y245)	p-JAK1(Y1022/1023)	0.042
p-ZAP70(Y319)/SYK(Y352)	p-MET(Y1234/1235)	0.042
p-P90RSK(S380)	p-PDGFRB(Y1009)	0.042
p-4EBP1(T37/46)	p-S6RIBPROT(S240/244)	0.042
p-SHP2(Y542)	p-STAT5(Y694)	0.042
p-CRKL(Y207)	p-AKT(S473)	0.042
p-4EBP1(T37/46)	p-CRKL(Y207)	0.042
p-PLCG1(Y783)	p-ERBB2(Y1221/1222)	0.042
p-KIT(C-)(Y719)	p-ERBB4(Y1284)	0.042
p-SHP2(Y542)	p-FOXO1(S319)/FOXO4(S262)	0.042
p-CDC2(Y15)	p-FOXO3A(S253)	0.042
p-CDK2(T160)	p-MTOR(S2448)	0.042
p-ZAP70(Y319)/SYK(Y352)	p-GSK3A(S21)	0.042
p-STAT6(Y641)	p-P38MAPK(T180/Y182)	0.042
p-KIT(C-)(Y719)	p-MET(Y1234/1235)	0.042
p-EGFR(Y1086)	p-MET(Y1349)	0.042
p-FAK(Y576/577)	p-PLCG1(Y783)	0.042
p-PI3KP85(Y458)P55(Y199)	p-PKCD(T505)	0.042
p-PDFGRA(Y849)/PDGFRB(Y857)	p-FAK(Y576/577)	0.042
p-PTEN(S380)	p-S6RIBPROT(S240/244)	0.042
p-STAT3(Y705)	p-SRC(Y416)	0.042
p-RAF(C-)(S338)	p-STAT3(Y705)	0.042
p-PLCG1(Y783)	p-AKT(S473)	0.04
p-4EBP1(S65)	p-CDK2(T160)	0.04
p-STAT3(Y705)	p-CRKII(Y221)	0.04
p-PDK1(S241)	p-CRKL(Y207)	0.04
p-ABL(C-)(Y245)	p-EGFR(Y1086)	0.04
p-KIT(C-)(Y719)	p-EGFR(Y845)	0.04
p-PI3KP85(Y458)P55(Y199)	p-EGFR(Y845)	0.04
p-SRC(Y416)	p-ERBB4(Y1284)	0.04
p-ABL(C-)(Y245)	p-FGFR1(Y653/654)	0.04
p-MET(Y1349)	p-GAB2(S159)	0.04
p-STAT6(Y641)	p-KIT(C-)(Y719)	0.04
p-PDGFRB(Y1009)	p-ERK1/2(T202/Y204)	0.04
p-PLCG2(Y759)	p-ERK1/2(T202/Y204)	0.04
p-STAT1(Y701)	p-SAPK/JNK(T183/Y185)	0.04
p-STAT1(Y701)	p-MET(Y1349)	0.04
p-MET(Y1234/1235)	p-PDGFRB(Y1009)	0.04
p-MTOR(S2448)	p-PDK1(S241)	0.04
p-PKCPAN/G(T514)	p-PLCG1(Y783)	0.04
p-4EBP1(S65)	p-PKCPAN/G(T514)	0.04
p-4EBP1(T37/46)	p-PKCPAN/G(T514)	0.04
p-P38MAPK(T180/Y182)	p-PKCD(T505)	0.04
p-SHC(Y239/240)	p-PKCD(T505)	0.04
p-FAK(Y576/577)	p-PTEN(S380)	0.04
p-SYK(Y525/526)	p-FAK(Y576/577)	0.04
p-P70S6K(T421/S424)	p-RAF(C-)(S259)	0.04
p-RAF(C-)(S338)	p-STAT3(S727)	0.04
p-PDGFRB(Y1009)	p-STAT5(Y694)	0.04
p-FAK(Y576/577)	p-STAT5(Y694)	0.04
p-STAT6(Y641)	p-STAT5(Y694)	0.04
p-ERK1/2(T202/Y204)	p-STAT6(Y641)	0.04
p-KIT(C-)(Y719)	p-ZAP70(Y319)/SYK(Y352)	0.04
p-PDK1(S241)	p-RAF(C-)(S338)	0.04
p-AKT(S473)	p-SYK(Y525/526)	0.04
p-ZAP70(Y319)/SYK(Y352)	p-CRKII(Y221)	0.038
p-MEK(1/2)(S217/221)	p-GAB2(S159)	0.038
p-CDK2(T160)	p-IGF1RB(Y1135/1136)/INSRB	0.038
p-CREB(S133)	p-IRS1(S1101)	0.038
p-P90RSK(S380)	p-MEK(1/2)(S217/221)	0.038
p-RAF(C-)(S338)	p-ERK1/2(T202/Y204)	0.038
p-GAB1(Y627)	p-P38MAPK(T180/Y182)	0.038
p-PLCG2(Y759)	p-P38MAPK(T180/Y182)	0.038
p-4EBP1(S65)	p-MET(Y1349)	0.038
p-PDGFRB(Y1009)	p-PDFGRA(Y849)/PDGFRB(Y857)	0.038
p-PTEN(S380)	p-PDK1(S241)	0.038
p-P70S6K(T421/S424)	p-PDK1(S241)	0.038
p-P90RSK(S380)	p-PI3KP85(Y458)P55(Y199)	0.038
p-SRC(Y416)	p-PLCG2(Y759)	0.038
p-CDC2(Y15)	p-PYK2(Y402)	0.038
p-FAK(Y576/577)	p-PYK2(Y402)	0.038
p-SRC(Y527)	p-S6RIBPROT(S240/244)	0.038
p-GSK3A(S21)	p-P70S6K(T421/S424)	0.038
p-P38MAPK(T180/Y182)	p-STAT5(Y694)	0.038
p-EGFR(Y1086)	p-SYK(Y525/526)	0.038
p-CREB(S133)	p-ZAP70(Y319)/SYK(Y352)	0.038
p-PYK2(Y402)	p-ZAP70(Y319)/SYK(Y352)	0.038
p-AKT(S473)	p-EGFR(Y1068)	0.036
p-FGFR1(Y653/654)	p-4EBP1(S65)	0.036
p-CREB(S133)	p-GAB2(S159)	0.036
p-ERK1/2(T202/Y204)	p-SAPK/JNK(T183/Y185)	0.036
p-JAK1(Y1022/1023)	p-PKCD(T505)	0.036
p-MET(Y1234/1235)	p-PKCD(T505)	0.036
p-P70S6K(T421/S424)	p-RAF(C-)(S338)	0.036
p-4EBP1(T37/46)	p-AKT(S473)	0.036
p-SYK(Y525/526)	p-CREB(S133)	0.036
p-EGFR(Y1173)	p-CRKL(Y207)	0.036
p-FAK(Y576/577)	p-CRKL(Y207)	0.036
p-EGFR(Y845)	p-EGFR(Y1086)	0.036
p-STAT6(Y641)	p-EGFR(Y845)	0.036
p-ERBB4(Y1284)	p-4EBP1(S65)	0.036
p-KIT(C-)(Y719)	p-GAB2(S159)	0.036
p-PDK1(S241)	p-IGF1RB(Y1135/1136)/INSRB	0.036
p-MEK(1/2)(S217/221)	p-MET(Y1349)	0.036
p-SHC(Y239/240)	p-MET(Y1349)	0.036
p-STAT3(Y705)	p-MET(Y1349)	0.036
p-STAT6(Y641)	p-PDGFRB(Y1009)	0.036
p-ERK1/2(T202/Y204)	p-PKCD(T505)	0.036
p-GAB1(Y627)	p-PTEN(S380)	0.036
p-MTOR(S2448)	p-SHP2(Y542)	0.036
p-PI3KP85(Y458)P55(Y199)	p-SHP2(Y542)	0.036
p-STAT3(S727)	p-RAF(C-)(S259)	0.036
p-EGFR(Y845)	p-P70S6K(T421/S424)	0.036
p-P90RSK(S380)	p-SHC(Y239/240)	0.036
p-4EBP1(T37/46)	p-SRC(Y416)	0.036
p-ERBB4(Y1284)	p-SRC(Y416)	0.036
p-CDK2(T160)	p-STAT1(Y701)	0.036
p-SYK(Y525/526)	p-STAT1(Y701)	0.036
p-MTOR(S2448)	p-STAT3(Y705)	0.036
p-FOXO3A(S253)	p-STAT5(Y694)	0.036
p-PLCG2(Y759)	p-STAT5(Y694)	0.036
p-PDK1(S241)	p-ZAP70(Y319)/SYK(Y352)	0.036
p-SRC(Y416)	p-ZAP70(Y319)/SYK(Y352)	0.036
p-EGFR(Y1068)	p-CDK2(T160)	0.034
p-P90RSK(S380)	p-CREB(S133)	0.034
p-FGFR1(Y653/654)	p-CRKL(Y207)	0.034
p-SHC(Y239/240)	p-EGFR(Y1173)	0.034
p-FOXO3A(S253)	p-ERBB2(Y1221/1222)	0.034
p-CDK2(T160)	p-FOXO1(S319)/FOXO4(S262)	0.034
p-STAT6(Y641)	p-FOXO3A(S253)	0.034
p-PDGFRA(Y754)	p-MTOR(S2448)	0.034
p-PTEN(S380)	p-GAB1(Y627)	0.034
p-SRC(Y527)	p-GAB2(S159)	0.034
p-STAT3(Y705)	p-GSK3A(S21)	0.034
p-4EBP1(T37/46)	p-KIT(C-)(Y719)	0.034
p-MEK(1/2)(S217/221)	p-KIT(C-)(Y719)	0.034
p-JAK1(Y1022/1023)	p-MET(Y1234/1235)	0.034
p-ERK1/2(T202/Y204)	p-MET(Y1349)	0.034
p-EGFR(Y1086)	p-PDFGRA(Y849)/PDGFRB(Y857)	0.034
p-SRC(Y527)	p-PDK1(S241)	0.034
p-RAF(C-)(S259)	p-FAK(Y576/577)	0.034
p-S6RIBPROT(S240/244)	p-RAF(C-)(S259)	0.034
p-IRS1(S1101)	p-RAF(C-)(S338)	0.034
p-CDC2(Y15)	p-P90RSK(S380)	0.034
p-PLCG2(Y759)	p-SRC(Y416)	0.034
p-PDFGRA(Y849)/PDGFRB(Y857)	p-STAT3(Y705)	0.034
p-ERBB2(Y1221/1222)	p-ZAP70(Y319)/SYK(Y352)	0.034
p-SRC(Y527)	p-AKT(S473)	0.034
p-ABL(C-)(Y245)	p-CDC2(Y15)	0.034
p-GSK3A(S21)	p-CDC2(Y15)	0.034
p-AKT(S473)	p-CRKL(Y207)	0.034
p-P90RSK(S380)	p-4EBP1(T37/46)	0.034
p-PI3KP85(Y458)P55(Y199)	p-FOXO1(S319)/FOXO4(S262)	0.034
p-FOXO1(S319)/FOXO4(S262)	p-P38MAPK(T180/Y182)	0.034
p-FAK(Y576/577)	p-MET(Y1349)	0.034
p-P38MAPK(T180/Y182)	p-PDK1(S241)	0.034
p-FGFR1(Y653/654)	p-PYK2(Y402)	0.034
p-IGF1RB(Y1135/1136)/INSRB	p-ZAP70(Y319)/SYK(Y352)	0.034
p-STAT6(Y641)	p-ABL(C-)(Y245)	0.032
p-CRKII(Y221)	p-CDC2(Y15)	0.032
p-FGFR1(Y653/654)	p-CDC2(Y15)	0.032
p-ZAP70(Y319)/SYK(Y352)	p-CDC2(Y15)	0.032
p-MEK(1/2)(S217/221)	p-CRKL(Y207)	0.032
p-PKCD(T505)	p-CRKL(Y207)	0.032
p-SYK(Y525/526)	p-EGFR(Y1086)	0.032
p-ABL(C-)(Y245)	p-4EBP1(S65)	0.032
p-CREB(S133)	p-ERBB2(Y1221/1222)	0.032
p-FAK(Y576/577)	p-JAK1(Y1022/1023)	0.032
p-CREB(S133)	p-KIT(C-)(Y719)	0.032
p-STAT6(Y641)	p-MEK(1/2)(S217/221)	0.032
p-4EBP1(S65)	p-P38MAPK(T180/Y182)	0.032
p-MEK(1/2)(S217/221)	p-SAPK/JNK(T183/Y185)	0.032
p-PDGFRB(Y1009)	p-PDGFRA(Y754)	0.032
p-GAB1(Y627)	p-PLCG1(Y783)	0.032
p-P38MAPK(T180/Y182)	p-PLCG1(Y783)	0.032
p-CRKL(Y207)	p-PKCD(T505)	0.032
p-STAT3(S727)	p-PTEN(S380)	0.032
p-RAF(C-)(S338)	p-FAK(Y576/577)	0.032
p-ZAP70(Y319)/SYK(Y352)	p-SRC(Y416)	0.032
p-EGFR(Y1173)	p-STAT1(Y701)	0.032
p-IRS1(S1101)	p-STAT3(Y705)	0.032
p-STAT5(Y694)	p-STAT3(Y705)	0.032
p-4EBP1(T37/46)	p-STAT5(Y694)	0.032
p-PKCPAN/G(T514)	p-STAT5(Y694)	0.032
p-PDGFRA(Y754)	p-STAT6(Y641)	0.032
p-FGFR1(Y653/654)	p-ZAP70(Y319)/SYK(Y352)	0.032
p-KIT(C-)(Y719)	p-IRS1(S1101)	0.03
p-ABL(C-)(Y245)	p-PDFGRA(Y849)/PDGFRB(Y857)	0.03
p-GAB2(S159)	p-PKCPAN/G(T514)	0.03
p-PLCG1(Y783)	p-STAT5(Y694)	0.03
p-MEK(1/2)(S217/221)	p-STAT6(Y641)	0.03
p-ZAP70(Y319)/SYK(Y352)	p-ABL(C-)(Y245)	0.03
p-STAT3(S727)	p-AKT(S473)	0.03
p-PYK2(Y402)	p-CDC2(Y15)	0.03
p-ERK1/2(T202/Y204)	p-CDK2(T160)	0.03
p-MET(Y1349)	p-CDK2(T160)	0.03
p-ERBB2(Y1221/1222)	p-EGFR(Y1086)	0.03
p-SHP2(Y542)	p-EGFR(Y1173)	0.03
p-PDK1(S241)	p-EGFR(Y845)	0.03
p-CRKL(Y207)	p-FGFR1(Y653/654)	0.03
p-EGFR(Y1068)	p-MTOR(S2448)	0.03
p-STAT3(S727)	p-MEK(1/2)(S217/221)	0.03
p-FAK(Y576/577)	p-ERK1/2(T202/Y204)	0.03
p-GAB2(S159)	p-P38MAPK(T180/Y182)	0.03
p-PI3KP85(Y458)P55(Y199)	p-MET(Y1234/1235)	0.03
p-PDFGRA(Y849)/PDGFRB(Y857)	p-MET(Y1349)	0.03
p-PYK2(Y402)	p-PDGFRA(Y754)	0.03
p-SYK(Y525/526)	p-PDGFRB(Y1009)	0.03
p-ABL(C-)(Y245)	p-PKCPAN/G(T514)	0.03
p-STAT3(Y705)	p-PYK2(Y402)	0.03
p-GAB2(S159)	p-RAF(C-)(S259)	0.03
p-PDGFRA(Y754)	p-RAF(C-)(S259)	0.03
p-PKCPAN/G(T514)	p-RAF(C-)(S338)	0.03
p-ERK1/2(T202/Y204)	p-SRC(Y416)	0.03
p-PI3KP85(Y458)P55(Y199)	p-SRC(Y416)	0.03
p-MEK(1/2)(S217/221)	p-SRC(Y527)	0.03
p-ERBB2(Y1221/1222)	p-STAT1(Y701)	0.03
p-IGF1RB(Y1135/1136)/INSRB	p-STAT5(Y694)	0.03
p-JAK1(Y1022/1023)	p-STAT5(Y694)	0.03
p-PI3KP85(Y458)P55(Y199)	p-STAT6(Y641)	0.03
p-P38MAPK(T180/Y182)	p-CDC2(Y15)	0.028
p-SAPK/JNK(T183/Y185)	p-CDK2(T160)	0.028
p-GAB1(Y627)	p-CRKII(Y221)	0.028
p-PLCG2(Y759)	p-EGFR(Y1068)	0.028
p-AKT(S473)	p-EGFR(Y845)	0.028
p-ABL(C-)(Y245)	p-4EBP1(T37/46)	0.028
p-AKT(S473)	p-4EBP1(T37/46)	0.028
p-SRC(Y416)	p-4EBP1(T37/46)	0.028
p-CDK2(T160)	p-ERBB2(Y1221/1222)	0.028
p-EGFR(Y1086)	p-ERBB2(Y1221/1222)	0.028
p-P70S6K(T421/S424)	p-ERBB2(Y1221/1222)	0.028
p-GAB2(S159)	p-FOXO3A(S253)	0.028
p-ZAP70(Y319)/SYK(Y352)	p-MTOR(S2448)	0.028
p-MEK(1/2)(S217/221)	p-IGF1RB(Y1135/1136)/INSRB	0.028
p-FOXO1(S319)/FOXO4(S262)	p-IRS1(S1101)	0.028
p-AKT(S473)	p-KIT(C-)(Y719)	0.028
p-PDGFRB(Y1009)	p-KIT(C-)(Y719)	0.028
p-SAPK/JNK(T183/Y185)	p-ERK1/2(T202/Y204)	0.028
p-EGFR(Y845)	p-PDGFRA(Y754)	0.028
p-EGFR(Y1173)	p-PDFGRA(Y849)/PDGFRB(Y857)	0.028
p-FAK(Y576/577)	p-PDFGRA(Y849)/PDGFRB(Y857)	0.028
p-CRKII(Y221)	p-PDK1(S241)	0.028
p-MTOR(S2448)	p-PI3KP85(Y458)P55(Y199)	0.028
p-STAT5(Y694)	p-PLCG2(Y759)	0.028
p-STAT1(Y701)	p-PKCD(T505)	0.028
p-MTOR(S2448)	p-S6RIBPROT(S240/244)	0.028
p-PDGFRB(Y1009)	p-P90RSK(S380)	0.028
p-SRC(Y527)	p-P90RSK(S380)	0.028
p-PDK1(S241)	p-SRC(Y416)	0.028
p-KIT(C-)(Y719)	p-STAT3(Y705)	0.028
p-CREB(S133)	p-STAT6(Y641)	0.028
p-EGFR(Y1173)	p-STAT6(Y641)	0.028
p-PDK1(S241)	p-AKT(S473)	0.028
p-P90RSK(S380)	p-CDC2(Y15)	0.028
p-PKCD(T505)	p-MTOR(S2448)	0.028
p-STAT5(Y694)	p-GSK3A(S21)	0.028
p-CREB(S133)	p-IGF1RB(Y1135/1136)/INSRB	0.028
p-4EBP1(T37/46)	p-ERK1/2(T202/Y204)	0.028
p-4EBP1(T37/46)	p-SAPK/JNK(T183/Y185)	0.028
p-CRKL(Y207)	p-PTEN(S380)	0.028
p-4EBP1(S65)	p-ABL(C-)(Y245)	0.026
p-RAF(C-)(S338)	p-AKT(S473)	0.026
p-PLCG2(Y759)	p-CDC2(Y15)	0.026
p-RAF(C-)(S259)	p-CDC2(Y15)	0.026
p-STAT3(S727)	p-CREB(S133)	0.026
p-CREB(S133)	p-EGFR(Y845)	0.026
p-CREB(S133)	p-4EBP1(T37/46)	0.026
p-PYK2(Y402)	p-4EBP1(T37/46)	0.026
p-SHC(Y239/240)	p-4EBP1(T37/46)	0.026
p-FOXO3A(S253)	p-ERBB4(Y1284)	0.026
p-FOXO3A(S253)	p-FGFR1(Y653/654)	0.026
p-4EBP1(S65)	p-FOXO1(S319)/FOXO4(S262)	0.026
p-STAT3(Y705)	p-FOXO3A(S253)	0.026
p-SAPK/JNK(T183/Y185)	p-GAB1(Y627)	0.026
p-PDFGRA(Y849)/PDGFRB(Y857)	p-GAB1(Y627)	0.026
p-IRS1(S1101)	p-JAK1(Y1022/1023)	0.026
p-PDGFRA(Y754)	p-KIT(C-)(Y719)	0.026
p-PKCPAN/G(T514)	p-KIT(C-)(Y719)	0.026
p-FGFR1(Y653/654)	p-ERK1/2(T202/Y204)	0.026
p-JAK1(Y1022/1023)	p-ERK1/2(T202/Y204)	0.026
p-P38MAPK(T180/Y182)	p-ERK1/2(T202/Y204)	0.026
p-GAB1(Y627)	p-SAPK/JNK(T183/Y185)	0.026
p-CRKL(Y207)	p-MET(Y1234/1235)	0.026
p-SYK(Y525/526)	p-MET(Y1349)	0.026
p-RAF(C-)(S259)	p-PDGFRA(Y754)	0.026
p-ERBB2(Y1221/1222)	p-PDGFRB(Y1009)	0.026
p-CDC2(Y15)	p-PDK1(S241)	0.026
p-SHC(Y239/240)	p-PDK1(S241)	0.026
p-FOXO1(S319)/FOXO4(S262)	p-PI3KP85(Y458)P55(Y199)	0.026
p-PDGFRA(Y754)	p-PLCG2(Y759)	0.026
p-STAT1(Y701)	p-PLCG2(Y759)	0.026
p-CREB(S133)	p-PTEN(S380)	0.026
p-SYK(Y525/526)	p-PTEN(S380)	0.026
p-EGFR(Y1173)	p-FAK(Y576/577)	0.026
p-JAK1(Y1022/1023)	p-PYK2(Y402)	0.026
p-SAPK/JNK(T183/Y185)	p-PYK2(Y402)	0.026
p-AKT(S473)	p-RAF(C-)(S338)	0.026
p-GAB2(S159)	p-RAF(C-)(S338)	0.026
p-GAB2(S159)	p-S6RIBPROT(S240/244)	0.026
p-SYK(Y525/526)	p-P90RSK(S380)	0.026
p-EGFR(Y1173)	p-SHC(Y239/240)	0.026
p-STAT3(Y705)	p-STAT1(Y701)	0.026
p-MEK(1/2)(S217/221)	p-STAT3(S727)	0.026
p-P90RSK(S380)	p-STAT3(S727)	0.026
p-PTEN(S380)	p-STAT3(Y705)	0.026
p-STAT3(Y705)	p-STAT5(Y694)	0.026
p-AKT(S473)	p-ABL(C-)(Y245)	0.024
p-JAK1(Y1022/1023)	p-AKT(S473)	0.024
p-SAPK/JNK(T183/Y185)	p-CDC2(Y15)	0.024
p-MTOR(S2448)	p-CDK2(T160)	0.024
p-EGFR(Y1173)	p-CREB(S133)	0.024
p-IRS1(S1101)	p-CREB(S133)	0.024
p-RAF(C-)(S259)	p-CREB(S133)	0.024
p-RAF(C-)(S338)	p-CREB(S133)	0.024
p-4EBP1(S65)	p-EGFR(Y1068)	0.024
p-ZAP70(Y319)/SYK(Y352)	p-EGFR(Y1068)	0.024
p-STAT5(Y694)	p-EGFR(Y1173)	0.024
p-STAT6(Y641)	p-4EBP1(S65)	0.024
p-STAT3(S727)	p-4EBP1(T37/46)	0.024
p-PYK2(Y402)	p-ERBB4(Y1284)	0.024
p-GSK3A(S21)	p-FOXO3A(S253)	0.024
p-PKCPAN/G(T514)	p-FOXO3A(S253)	0.024
p-P90RSK(S380)	p-FOXO3A(S253)	0.024
p-SRC(Y527)	p-MTOR(S2448)	0.024
p-EGFR(Y1173)	p-IRS1(S1101)	0.024
p-MET(Y1234/1235)	p-JAK1(Y1022/1023)	0.024
p-EGFR(Y1173)	p-MEK(1/2)(S217/221)	0.024
p-4EBP1(S65)	p-MEK(1/2)(S217/221)	0.024
p-P70S6K(T421/S424)	p-MEK(1/2)(S217/221)	0.024
p-PDK1(S241)	p-ERK1/2(T202/Y204)	0.024
p-PTEN(S380)	p-ERK1/2(T202/Y204)	0.024
p-PKCD(T505)	p-P38MAPK(T180/Y182)	0.024
p-PTEN(S380)	p-P38MAPK(T180/Y182)	0.024
p-PDFGRA(Y849)/PDGFRB(Y857)	p-MET(Y1234/1235)	0.024
p-IRS1(S1101)	p-MET(Y1349)	0.024
p-ZAP70(Y319)/SYK(Y352)	p-MET(Y1349)	0.024
p-PTEN(S380)	p-PDGFRA(Y754)	0.024
p-PDGFRA(Y754)	p-PDFGRA(Y849)/PDGFRB(Y857)	0.024
p-FAK(Y576/577)	p-PDGFRB(Y1009)	0.024
p-SRC(Y416)	p-PI3KP85(Y458)P55(Y199)	0.024
p-CDK2(T160)	p-PLCG1(Y783)	0.024
p-MTOR(S2448)	p-PLCG1(Y783)	0.024
p-EGFR(Y845)	p-PLCG2(Y759)	0.024
p-ERBB4(Y1284)	p-PYK2(Y402)	0.024
p-MEK(1/2)(S217/221)	p-PYK2(Y402)	0.024
p-FGFR1(Y653/654)	p-SHP2(Y542)	0.024
p-JAK1(Y1022/1023)	p-SHP2(Y542)	0.024
p-SAPK/JNK(T183/Y185)	p-S6RIBPROT(S240/244)	0.024
p-MEK(1/2)(S217/221)	p-P90RSK(S380)	0.024
p-ERK1/2(T202/Y204)	p-P90RSK(S380)	0.024
p-PDGFRA(Y754)	p-P90RSK(S380)	0.024
p-GSK3A(S21)	p-SRC(Y527)	0.024
p-CREB(S133)	p-SYK(Y525/526)	0.024
p-JAK1(Y1022/1023)	p-SYK(Y525/526)	0.024
p-MET(Y1349)	p-MTOR(S2448)	0.022
p-MTOR(S2448)	p-ABL(C-)(Y245)	0.022
p-ERBB2(Y1221/1222)	p-CDC2(Y15)	0.022
p-KIT(C-)(Y719)	p-CDC2(Y15)	0.022
p-PKCPAN/G(T514)	p-CREB(S133)	0.022
p-PLCG2(Y759)	p-CRKII(Y221)	0.022
p-ERBB4(Y1284)	p-EGFR(Y1068)	0.022
p-MEK(1/2)(S217/221)	p-EGFR(Y1173)	0.022
p-PDGFRA(Y754)	p-ERBB4(Y1284)	0.022
p-MTOR(S2448)	p-FGFR1(Y653/654)	0.022
p-ERBB2(Y1221/1222)	p-FOXO1(S319)/FOXO4(S262)	0.022
p-CREB(S133)	p-GAB1(Y627)	0.022
p-4EBP1(T37/46)	p-GAB1(Y627)	0.022
p-MTOR(S2448)	p-GAB2(S159)	0.022
p-PDGFRB(Y1009)	p-GAB2(S159)	0.022
p-P70S6K(T421/S424)	p-GAB2(S159)	0.022
p-GAB1(Y627)	p-GSK3A(S21)	0.022
p-P38MAPK(T180/Y182)	p-IGF1RB(Y1135/1136)/INSRB	0.022
p-STAT6(Y641)	p-IGF1RB(Y1135/1136)/INSRB	0.022
p-SHC(Y239/240)	p-IRS1(S1101)	0.022
p-RAF(C-)(S259)	p-JAK1(Y1022/1023)	0.022
p-PDK1(S241)	p-KIT(C-)(Y719)	0.022
p-ABL(C-)(Y245)	p-ERK1/2(T202/Y204)	0.022
p-STAT3(S727)	p-SAPK/JNK(T183/Y185)	0.022
p-PLCG2(Y759)	p-MET(Y1349)	0.022
p-MET(Y1349)	p-PDGFRA(Y754)	0.022
p-ERBB4(Y1284)	p-PDK1(S241)	0.022
p-PI3KP85(Y458)P55(Y199)	p-PDK1(S241)	0.022
p-ERK1/2(T202/Y204)	p-PLCG2(Y759)	0.022
p-CRKL(Y207)	p-PKCPAN/G(T514)	0.022
p-SHC(Y239/240)	p-PKCPAN/G(T514)	0.022
p-SAPK/JNK(T183/Y185)	p-PKCD(T505)	0.022
p-FAK(Y576/577)	p-PKCD(T505)	0.022
p-CDC2(Y15)	p-FAK(Y576/577)	0.022
p-MET(Y1234/1235)	p-SHP2(Y542)	0.022
p-SYK(Y525/526)	p-SHP2(Y542)	0.022
p-MTOR(S2448)	p-RAF(C-)(S338)	0.022
p-FOXO1(S319)/FOXO4(S262)	p-S6RIBPROT(S240/244)	0.022
p-IGF1RB(Y1135/1136)/INSRB	p-S6RIBPROT(S240/244)	0.022
p-MEK(1/2)(S217/221)	p-P70S6K(T421/S424)	0.022
p-STAT3(Y705)	p-P70S6K(T421/S424)	0.022
p-AKT(S473)	p-SRC(Y527)	0.022
p-CREB(S133)	p-SRC(Y527)	0.022
p-4EBP1(T37/46)	p-STAT1(Y701)	0.022
p-MET(Y1349)	p-STAT3(S727)	0.022
p-CRKII(Y221)	p-STAT3(Y705)	0.022
p-EGFR(Y845)	p-STAT5(Y694)	0.022
p-PI3KP85(Y458)P55(Y199)	p-STAT5(Y694)	0.022
p-CRKL(Y207)	p-ZAP70(Y319)/SYK(Y352)	0.022
p-PLCG1(Y783)	p-ZAP70(Y319)/SYK(Y352)	0.022
p-FOXO3A(S253)	p-AKT(S473)	0.02
p-RAF(C-)(S259)	p-AKT(S473)	0.02
p-CDC2(Y15)	p-CREB(S133)	0.02
p-STAT3(Y705)	p-CREB(S133)	0.02
p-FGFR1(Y653/654)	p-CRKII(Y221)	0.02
p-FAK(Y576/577)	p-EGFR(Y1068)	0.02
p-ERBB4(Y1284)	p-EGFR(Y1173)	0.02
p-JAK1(Y1022/1023)	p-EGFR(Y1173)	0.02
p-PKCPAN/G(T514)	p-EGFR(Y845)	0.02
p-GSK3A(S21)	p-4EBP1(T37/46)	0.02
p-AKT(S473)	p-ERBB2(Y1221/1222)	0.02
p-STAT1(Y701)	p-ERBB2(Y1221/1222)	0.02
p-PLCG1(Y783)	p-ERBB4(Y1284)	0.02
p-GAB1(Y627)	p-FGFR1(Y653/654)	0.02
p-RAF(C-)(S338)	p-FOXO3A(S253)	0.02
p-EGFR(Y1173)	p-MTOR(S2448)	0.02
p-PDGFRA(Y754)	p-GAB2(S159)	0.02
p-MET(Y1234/1235)	p-GSK3A(S21)	0.02
p-EGFR(Y1086)	p-MEK(1/2)(S217/221)	0.02
p-PDFGRA(Y849)/PDGFRB(Y857)	p-MEK(1/2)(S217/221)	0.02
p-PLCG1(Y783)	p-P38MAPK(T180/Y182)	0.02
p-P90RSK(S380)	p-PDGFRA(Y754)	0.02
p-4EBP1(S65)	p-PDFGRA(Y849)/PDGFRB(Y857)	0.02
p-P90RSK(S380)	p-PDK1(S241)	0.02
p-P38MAPK(T180/Y182)	p-PLCG2(Y759)	0.02
p-GAB1(Y627)	p-PKCPAN/G(T514)	0.02
p-MET(Y1349)	p-PKCPAN/G(T514)	0.02
p-4EBP1(T37/46)	p-PTEN(S380)	0.02
p-P70S6K(T421/S424)	p-PTEN(S380)	0.02
p-STAT3(S727)	p-SHP2(Y542)	0.02
p-IGF1RB(Y1135/1136)/INSRB	p-RAF(C-)(S259)	0.02
p-STAT6(Y641)	p-RAF(C-)(S259)	0.02
p-EGFR(Y845)	p-S6RIBPROT(S240/244)	0.02
p-4EBP1(S65)	p-P90RSK(S380)	0.02
p-STAT6(Y641)	p-P90RSK(S380)	0.02
p-FOXO3A(S253)	p-P70S6K(T421/S424)	0.02
p-P38MAPK(T180/Y182)	p-P70S6K(T421/S424)	0.02
p-IRS1(S1101)	p-SHC(Y239/240)	0.02
p-SHP2(Y542)	p-SRC(Y416)	0.02
p-S6RIBPROT(S240/244)	p-SRC(Y527)	0.02
p-PLCG2(Y759)	p-STAT1(Y701)	0.02
p-PI3KP85(Y458)P55(Y199)	p-STAT3(S727)	0.02
p-FAK(Y576/577)	p-STAT3(S727)	0.02
p-STAT6(Y641)	p-STAT3(S727)	0.02
p-MET(Y1349)	p-STAT3(Y705)	0.02
p-STAT1(Y701)	p-STAT3(Y705)	0.02
p-CREB(S133)	p-STAT5(Y694)	0.02
p-PDGFRB(Y1009)	p-STAT6(Y641)	0.02
p-ABL(C-)(Y245)	p-ZAP70(Y319)/SYK(Y352)	0.02
p-IGF1RB(Y1135/1136)/INSRB	p-PTEN(S380)	0.02
p-4EBP1(S65)	p-CRKII(Y221)	0.018
p-PDK1(S241)	p-CRKII(Y221)	0.018
p-ABL(C-)(Y245)	p-EGFR(Y1173)	0.018
p-RAF(C-)(S259)	p-SRC(Y527)	0.018
p-ERK1/2(T202/Y204)	p-ABL(C-)(Y245)	0.018
p-PKCPAN/G(T514)	p-ABL(C-)(Y245)	0.018
p-ERBB4(Y1284)	p-AKT(S473)	0.018
p-PKCD(T505)	p-AKT(S473)	0.018
p-FOXO3A(S253)	p-CDC2(Y15)	0.018
p-FAK(Y576/577)	p-CDK2(T160)	0.018
p-PTEN(S380)	p-CREB(S133)	0.018
p-ABL(C-)(Y245)	p-CRKII(Y221)	0.018
p-PDGFRA(Y754)	p-CRKII(Y221)	0.018
p-IRS1(S1101)	p-CRKL(Y207)	0.018
p-PKCPAN/G(T514)	p-CRKL(Y207)	0.018
p-JAK1(Y1022/1023)	p-EGFR(Y1068)	0.018
p-PDGFRB(Y1009)	p-EGFR(Y845)	0.018
p-P90RSK(S380)	p-4EBP1(S65)	0.018
p-SRC(Y527)	p-4EBP1(S65)	0.018
p-MTOR(S2448)	p-4EBP1(T37/46)	0.018
p-IRS1(S1101)	p-4EBP1(T37/46)	0.018
p-PTEN(S380)	p-ERBB2(Y1221/1222)	0.018
p-KIT(C-)(Y719)	p-FOXO1(S319)/FOXO4(S262)	0.018
p-PDGFRA(Y754)	p-FOXO3A(S253)	0.018
p-KIT(C-)(Y719)	p-GAB1(Y627)	0.018
p-CDC2(Y15)	p-GAB2(S159)	0.018
p-ERBB4(Y1284)	p-GAB2(S159)	0.018
p-FOXO3A(S253)	p-GAB2(S159)	0.018
p-RAF(C-)(S338)	p-GAB2(S159)	0.018
p-SRC(Y416)	p-GAB2(S159)	0.018
p-P70S6K(T421/S424)	p-GSK3A(S21)	0.018
p-STAT6(Y641)	p-GSK3A(S21)	0.018
p-CRKII(Y221)	p-IGF1RB(Y1135/1136)/INSRB	0.018
p-EGFR(Y1173)	p-JAK1(Y1022/1023)	0.018
p-STAT5(Y694)	p-JAK1(Y1022/1023)	0.018
p-JAK1(Y1022/1023)	p-KIT(C-)(Y719)	0.018
p-SHP2(Y542)	p-KIT(C-)(Y719)	0.018
p-SYK(Y525/526)	p-MEK(1/2)(S217/221)	0.018
p-SHP2(Y542)	p-P38MAPK(T180/Y182)	0.018
p-P38MAPK(T180/Y182)	p-SAPK/JNK(T183/Y185)	0.018
p-PKCD(T505)	p-MET(Y1234/1235)	0.018
p-PYK2(Y402)	p-MET(Y1349)	0.018
p-FGFR1(Y653/654)	p-PDGFRA(Y754)	0.018
p-GAB1(Y627)	p-PDK1(S241)	0.018
p-FOXO3A(S253)	p-PLCG2(Y759)	0.018
p-FOXO3A(S253)	p-PKCPAN/G(T514)	0.018
p-CDC2(Y15)	p-PTEN(S380)	0.018
p-STAT1(Y701)	p-PTEN(S380)	0.018
p-SHC(Y239/240)	p-PYK2(Y402)	0.018
p-ZAP70(Y319)/SYK(Y352)	p-PYK2(Y402)	0.018
p-4EBP1(S65)	p-SHP2(Y542)	0.018
p-ZAP70(Y319)/SYK(Y352)	p-SHP2(Y542)	0.018
p-SYK(Y525/526)	p-RAF(C-)(S259)	0.018
p-ERK1/2(T202/Y204)	p-RAF(C-)(S338)	0.018
p-PYK2(Y402)	p-RAF(C-)(S338)	0.018
p-PYK2(Y402)	p-P90RSK(S380)	0.018
p-FGFR1(Y653/654)	p-P70S6K(T421/S424)	0.018
p-GAB1(Y627)	p-STAT1(Y701)	0.018
p-PLCG1(Y783)	p-STAT1(Y701)	0.018
p-GAB2(S159)	p-STAT3(S727)	0.018
p-SAPK/JNK(T183/Y185)	p-STAT3(S727)	0.018
p-PLCG1(Y783)	p-STAT3(S727)	0.018
p-S6RIBPROT(S240/244)	p-STAT3(S727)	0.018
p-PI3KP85(Y458)P55(Y199)	p-STAT3(Y705)	0.018
p-CRKL(Y207)	p-STAT5(Y694)	0.018
p-PTEN(S380)	p-STAT5(Y694)	0.018
p-4EBP1(S65)	p-STAT6(Y641)	0.018
p-P90RSK(S380)	p-ABL(C-)(Y245)	0.016
p-AKT(S473)	p-CDK2(T160)	0.016
p-FOXO1(S319)/FOXO4(S262)	p-CDK2(T160)	0.016
p-PDGFRA(Y754)	p-CDK2(T160)	0.016
p-STAT3(S727)	p-CDK2(T160)	0.016
p-ERBB2(Y1221/1222)	p-CREB(S133)	0.016
p-FGFR1(Y653/654)	p-CREB(S133)	0.016
p-IGF1RB(Y1135/1136)/INSRB	p-CRKII(Y221)	0.016
p-PKCPAN/G(T514)	p-EGFR(Y1068)	0.016
p-CRKL(Y207)	p-EGFR(Y1173)	0.016
p-FOXO3A(S253)	p-EGFR(Y1173)	0.016
p-ZAP70(Y319)/SYK(Y352)	p-EGFR(Y845)	0.016
p-AKT(S473)	p-4EBP1(S65)	0.016
p-CRKL(Y207)	p-ERBB2(Y1221/1222)	0.016
p-4EBP1(S65)	p-ERBB4(Y1284)	0.016
p-CDC2(Y15)	p-FGFR1(Y653/654)	0.016
p-PDK1(S241)	p-FOXO1(S319)/FOXO4(S262)	0.016
p-STAT3(S727)	p-FOXO1(S319)/FOXO4(S262)	0.016
p-P70S6K(T421/S424)	p-FOXO3A(S253)	0.016
p-GAB1(Y627)	p-MTOR(S2448)	0.016
p-PYK2(Y402)	p-MTOR(S2448)	0.016
p-PDK1(S241)	p-GAB1(Y627)	0.016
p-ABL(C-)(Y245)	p-GAB2(S159)	0.016
p-STAT6(Y641)	p-GAB2(S159)	0.016
p-EGFR(Y845)	p-IRS1(S1101)	0.016
p-CDC2(Y15)	p-KIT(C-)(Y719)	0.016
p-CRKII(Y221)	p-KIT(C-)(Y719)	0.016
p-KIT(C-)(Y719)	p-MEK(1/2)(S217/221)	0.016
p-SRC(Y416)	p-ERK1/2(T202/Y204)	0.016
p-AKT(S473)	p-P38MAPK(T180/Y182)	0.016
p-SYK(Y525/526)	p-P38MAPK(T180/Y182)	0.016
p-AKT(S473)	p-SAPK/JNK(T183/Y185)	0.016
p-ERBB2(Y1221/1222)	p-SAPK/JNK(T183/Y185)	0.016
p-FAK(Y576/577)	p-SAPK/JNK(T183/Y185)	0.016
p-STAT3(Y705)	p-SAPK/JNK(T183/Y185)	0.016
p-CREB(S133)	p-MET(Y1234/1235)	0.016
p-CREB(S133)	p-MET(Y1349)	0.016
p-ERBB2(Y1221/1222)	p-MET(Y1349)	0.016
p-PDFGRA(Y849)/PDGFRB(Y857)	p-PDGFRB(Y1009)	0.016
p-PDGFRA(Y754)	p-PDK1(S241)	0.016
p-CREB(S133)	p-PKCPAN/G(T514)	0.016
p-FGFR1(Y653/654)	p-PKCD(T505)	0.016
p-PTEN(S380)	p-PKCD(T505)	0.016
p-SRC(Y527)	p-PKCD(T505)	0.016
p-P90RSK(S380)	p-PTEN(S380)	0.016
p-FOXO1(S319)/FOXO4(S262)	p-PYK2(Y402)	0.016
p-PDGFRA(Y754)	p-RAF(C-)(S338)	0.016
p-STAT1(Y701)	p-RAF(C-)(S338)	0.016
p-IRS1(S1101)	p-S6RIBPROT(S240/244)	0.016
p-PDFGRA(Y849)/PDGFRB(Y857)	p-S6RIBPROT(S240/244)	0.016
p-FGFR1(Y653/654)	p-P90RSK(S380)	0.016
p-PLCG2(Y759)	p-P90RSK(S380)	0.016
p-SHP2(Y542)	p-P70S6K(T421/S424)	0.016
p-4EBP1(S65)	p-SRC(Y416)	0.016
p-STAT3(S727)	p-SRC(Y416)	0.016
p-EGFR(Y845)	p-STAT1(Y701)	0.016
p-CDK2(T160)	p-STAT3(S727)	0.016
p-PDFGRA(Y849)/PDGFRB(Y857)	p-STAT3(S727)	0.016
p-PKCD(T505)	p-STAT5(Y694)	0.016
p-RAF(C-)(S338)	p-STAT5(Y694)	0.016
p-SHC(Y239/240)	p-STAT5(Y694)	0.016
p-PKCPAN/G(T514)	p-SYK(Y525/526)	0.016
p-PI3KP85(Y458)P55(Y199)	p-ZAP70(Y319)/SYK(Y352)	0.016
p-PDFGRA(Y849)/PDGFRB(Y857)	p-ABL(C-)(Y245)	0.014
p-ZAP70(Y319)/SYK(Y352)	p-AKT(S473)	0.014
p-PDFGRA(Y849)/PDGFRB(Y857)	p-CDK2(T160)	0.014
p-MTOR(S2448)	p-CREB(S133)	0.014
p-STAT6(Y641)	p-CREB(S133)	0.014
p-EGFR(Y845)	p-CRKL(Y207)	0.014
p-SHC(Y239/240)	p-CRKL(Y207)	0.014
p-STAT5(Y694)	p-CRKL(Y207)	0.014
p-STAT6(Y641)	p-CRKL(Y207)	0.014
p-MTOR(S2448)	p-EGFR(Y1068)	0.014
p-S6RIBPROT(S240/244)	p-EGFR(Y1068)	0.014
p-CRKL(Y207)	p-4EBP1(S65)	0.014
p-MEK(1/2)(S217/221)	p-4EBP1(T37/46)	0.014
p-STAT6(Y641)	p-4EBP1(T37/46)	0.014
p-PKCPAN/G(T514)	p-ERBB2(Y1221/1222)	0.014
p-EGFR(Y1173)	p-ERBB4(Y1284)	0.014
p-GAB2(S159)	p-ERBB4(Y1284)	0.014
p-CDK2(T160)	p-FGFR1(Y653/654)	0.014
p-CRKII(Y221)	p-FGFR1(Y653/654)	0.014
p-PTEN(S380)	p-FGFR1(Y653/654)	0.014
p-STAT5(Y694)	p-MTOR(S2448)	0.014
p-CDC2(Y15)	p-GAB1(Y627)	0.014
p-FOXO1(S319)/FOXO4(S262)	p-GAB1(Y627)	0.014
p-P38MAPK(T180/Y182)	p-GAB1(Y627)	0.014
p-STAT5(Y694)	p-GAB1(Y627)	0.014
p-4EBP1(S65)	p-GAB2(S159)	0.014
p-PLCG2(Y759)	p-GAB2(S159)	0.014
p-STAT5(Y694)	p-GAB2(S159)	0.014
p-FGFR1(Y653/654)	p-GSK3A(S21)	0.014
p-AKT(S473)	p-IGF1RB(Y1135/1136)/INSRB	0.014
p-STAT5(Y694)	p-IGF1RB(Y1135/1136)/INSRB	0.014
p-CDK2(T160)	p-IRS1(S1101)	0.014
p-SRC(Y527)	p-KIT(C-)(Y719)	0.014
p-ZAP70(Y319)/SYK(Y352)	p-KIT(C-)(Y719)	0.014
p-EGFR(Y1068)	p-MEK(1/2)(S217/221)	0.014
p-STAT3(Y705)	p-MEK(1/2)(S217/221)	0.014
p-ERBB4(Y1284)	p-ERK1/2(T202/Y204)	0.014
p-GSK3A(S21)	p-ERK1/2(T202/Y204)	0.014
p-STAT3(S727)	p-ERK1/2(T202/Y204)	0.014
p-P70S6K(T421/S424)	p-P38MAPK(T180/Y182)	0.014
p-STAT5(Y694)	p-P38MAPK(T180/Y182)	0.014
p-PYK2(Y402)	p-SAPK/JNK(T183/Y185)	0.014
p-MEK(1/2)(S217/221)	p-MET(Y1234/1235)	0.014
p-STAT1(Y701)	p-MET(Y1234/1235)	0.014
p-ERBB4(Y1284)	p-MET(Y1349)	0.014
p-CREB(S133)	p-PDFGRA(Y849)/PDGFRB(Y857)	0.014
p-EGFR(Y845)	p-PDK1(S241)	0.014
p-SRC(Y416)	p-PDK1(S241)	0.014
p-SYK(Y525/526)	p-PDK1(S241)	0.014
p-FGFR1(Y653/654)	p-PI3KP85(Y458)P55(Y199)	0.014
p-PDFGRA(Y849)/PDGFRB(Y857)	p-PI3KP85(Y458)P55(Y199)	0.014
p-P38MAPK(T180/Y182)	p-PKCPAN/G(T514)	0.014
p-PDK1(S241)	p-PKCPAN/G(T514)	0.014
p-PLCG1(Y783)	p-PKCPAN/G(T514)	0.014
p-CRKII(Y221)	p-PTEN(S380)	0.014
p-PLCG1(Y783)	p-PYK2(Y402)	0.014
p-STAT3(S727)	p-PYK2(Y402)	0.014
p-FGFR1(Y653/654)	p-RAF(C-)(S259)	0.014
p-PLCG2(Y759)	p-RAF(C-)(S338)	0.014
p-FOXO3A(S253)	p-S6RIBPROT(S240/244)	0.014
p-SYK(Y525/526)	p-S6RIBPROT(S240/244)	0.014
p-JAK1(Y1022/1023)	p-P90RSK(S380)	0.014
p-ERBB2(Y1221/1222)	p-P70S6K(T421/S424)	0.014
p-MTOR(S2448)	p-P70S6K(T421/S424)	0.014
p-CDC2(Y15)	p-SRC(Y416)	0.014
p-PDGFRA(Y754)	p-SRC(Y416)	0.014
p-GAB2(S159)	p-SRC(Y527)	0.014
p-EGFR(Y1068)	p-STAT3(Y705)	0.014
p-FOXO1(S319)/FOXO4(S262)	p-STAT5(Y694)	0.014
p-CRKL(Y207)	p-STAT6(Y641)	0.014
p-EGFR(Y1068)	p-SYK(Y525/526)	0.014
p-P70S6K(T421/S424)	p-SYK(Y525/526)	0.014
p-4EBP1(T37/46)	p-CDC2(Y15)	0.014
p-SRC(Y527)	p-EGFR(Y1068)	0.014
p-PTEN(S380)	p-EGFR(Y1173)	0.014
p-FOXO1(S319)/FOXO4(S262)	p-SHP2(Y542)	0.014
p-PLCG2(Y759)	p-S6RIBPROT(S240/244)	0.014
p-SHP2(Y542)	p-S6RIBPROT(S240/244)	0.014
p-SHC(Y239/240)	p-P90RSK(S380)	0.014
p-MTOR(S2448)	p-SRC(Y527)	0.014
p-MET(Y1234/1235)	p-STAT1(Y701)	0.014
p-PDGFRB(Y1009)	p-SYK(Y525/526)	0.014
p-FOXO3A(S253)	p-ABL(C-)(Y245)	0.012
p-PDK1(S241)	p-CDC2(Y15)	0.012
p-ERBB4(Y1284)	p-CDK2(T160)	0.012
p-CRKII(Y221)	p-CREB(S133)	0.012
p-SAPK/JNK(T183/Y185)	p-CREB(S133)	0.012
p-SRC(Y527)	p-CREB(S133)	0.012
p-FAK(Y576/577)	p-CRKII(Y221)	0.012
p-ABL(C-)(Y245)	p-EGFR(Y1068)	0.012
p-SHC(Y239/240)	p-EGFR(Y1068)	0.012
p-4EBP1(S65)	p-EGFR(Y845)	0.012
p-ERBB4(Y1284)	p-EGFR(Y845)	0.012
p-FOXO1(S319)/FOXO4(S262)	p-EGFR(Y845)	0.012
p-JAK1(Y1022/1023)	p-EGFR(Y845)	0.012
p-PDFGRA(Y849)/PDGFRB(Y857)	p-EGFR(Y845)	0.012
p-EGFR(Y845)	p-4EBP1(S65)	0.012
p-FOXO1(S319)/FOXO4(S262)	p-4EBP1(S65)	0.012
p-PLCG1(Y783)	p-4EBP1(T37/46)	0.012
p-PTEN(S380)	p-ERBB4(Y1284)	0.012
p-P70S6K(T421/S424)	p-FGFR1(Y653/654)	0.012
p-MEK(1/2)(S217/221)	p-FOXO1(S319)/FOXO4(S262)	0.012
p-ERBB4(Y1284)	p-FOXO3A(S253)	0.012
p-FGFR1(Y653/654)	p-FOXO3A(S253)	0.012
p-PLCG1(Y783)	p-FOXO3A(S253)	0.012
p-PLCG2(Y759)	p-FOXO3A(S253)	0.012
p-CREB(S133)	p-MTOR(S2448)	0.012
p-RAF(C-)(S338)	p-MTOR(S2448)	0.012
p-MET(Y1349)	p-GAB1(Y627)	0.012
p-PKCPAN/G(T514)	p-GAB1(Y627)	0.012
p-STAT3(Y705)	p-GAB1(Y627)	0.012
p-ERBB4(Y1284)	p-GSK3A(S21)	0.012
p-PDFGRA(Y849)/PDGFRB(Y857)	p-IGF1RB(Y1135/1136)/INSRB	0.012
p-ABL(C-)(Y245)	p-IRS1(S1101)	0.012
p-FGFR1(Y653/654)	p-IRS1(S1101)	0.012
p-PLCG1(Y783)	p-IRS1(S1101)	0.012
p-PLCG2(Y759)	p-JAK1(Y1022/1023)	0.012
p-IGF1RB(Y1135/1136)/INSRB	p-KIT(C-)(Y719)	0.012
p-GAB2(S159)	p-MEK(1/2)(S217/221)	0.012
p-PDK1(S241)	p-MEK(1/2)(S217/221)	0.012
p-ERK1/2(T202/Y204)	p-MET(Y1234/1235)	0.012
p-PDGFRB(Y1009)	p-MET(Y1234/1235)	0.012
p-STAT3(S727)	p-MET(Y1349)	0.012
p-SRC(Y416)	p-PDGFRA(Y754)	0.012
p-STAT3(Y705)	p-PDGFRA(Y754)	0.012
p-STAT6(Y641)	p-PDK1(S241)	0.012
p-PTEN(S380)	p-PI3KP85(Y458)P55(Y199)	0.012
p-SHP2(Y542)	p-PI3KP85(Y458)P55(Y199)	0.012
p-STAT3(S727)	p-PI3KP85(Y458)P55(Y199)	0.012
p-JAK1(Y1022/1023)	p-PLCG2(Y759)	0.012
p-PI3KP85(Y458)P55(Y199)	p-PLCG2(Y759)	0.012
p-PKCPAN/G(T514)	p-PKCD(T505)	0.012
p-MTOR(S2448)	p-PYK2(Y402)	0.012
p-GAB2(S159)	p-SHP2(Y542)	0.012
p-P38MAPK(T180/Y182)	p-SHP2(Y542)	0.012
p-AKT(S473)	p-RAF(C-)(S259)	0.012
p-PLCG2(Y759)	p-RAF(C-)(S259)	0.012
p-PKCPAN/G(T514)	p-RAF(C-)(S259)	0.012
p-GAB1(Y627)	p-RAF(C-)(S338)	0.012
p-SRC(Y416)	p-S6RIBPROT(S240/244)	0.012
p-4EBP1(T37/46)	p-P90RSK(S380)	0.012
p-FOXO3A(S253)	p-P90RSK(S380)	0.012
p-STAT1(Y701)	p-P90RSK(S380)	0.012
p-GAB1(Y627)	p-P70S6K(T421/S424)	0.012
p-SHC(Y239/240)	p-P70S6K(T421/S424)	0.012
p-AKT(S473)	p-SRC(Y416)	0.012
p-IRS1(S1101)	p-SRC(Y527)	0.012
p-JAK1(Y1022/1023)	p-SRC(Y527)	0.012
p-ZAP70(Y319)/SYK(Y352)	p-SRC(Y527)	0.012
p-SHP2(Y542)	p-STAT3(S727)	0.012
p-SAPK/JNK(T183/Y185)	p-STAT3(Y705)	0.012
p-SRC(Y416)	p-STAT3(Y705)	0.012
p-AKT(S473)	p-STAT5(Y694)	0.012
p-ERBB4(Y1284)	p-STAT5(Y694)	0.012
p-P38MAPK(T180/Y182)	p-STAT6(Y641)	0.012
p-SHC(Y239/240)	p-ABL(C-)(Y245)	0.01
p-IRS1(S1101)	p-AKT(S473)	0.01
p-AKT(S473)	p-CDC2(Y15)	0.01
p-GAB1(Y627)	p-CDC2(Y15)	0.01
p-PDGFRB(Y1009)	p-CDC2(Y15)	0.01
p-PKCPAN/G(T514)	p-CDC2(Y15)	0.01
p-SRC(Y416)	p-CDC2(Y15)	0.01
p-GSK3A(S21)	p-CREB(S133)	0.01
p-PKCD(T505)	p-CREB(S133)	0.01
p-STAT5(Y694)	p-CRKII(Y221)	0.01
p-P90RSK(S380)	p-EGFR(Y1068)	0.01
p-MTOR(S2448)	p-EGFR(Y1086)	0.01
p-MET(Y1349)	p-EGFR(Y1086)	0.01
p-ERBB2(Y1221/1222)	p-EGFR(Y1173)	0.01
p-MTOR(S2448)	p-EGFR(Y1173)	0.01
p-PI3KP85(Y458)P55(Y199)	p-EGFR(Y1173)	0.01
p-ABL(C-)(Y245)	p-EGFR(Y845)	0.01
p-FAK(Y576/577)	p-EGFR(Y845)	0.01
p-P70S6K(T421/S424)	p-4EBP1(S65)	0.01
p-CDC2(Y15)	p-4EBP1(T37/46)	0.01
p-CDK2(T160)	p-4EBP1(T37/46)	0.01
p-P38MAPK(T180/Y182)	p-4EBP1(T37/46)	0.01
p-P70S6K(T421/S424)	p-4EBP1(T37/46)	0.01
p-PKCD(T505)	p-ERBB2(Y1221/1222)	0.01
p-SHP2(Y542)	p-ERBB4(Y1284)	0.01
p-STAT3(S727)	p-ERBB4(Y1284)	0.01
p-CRKL(Y207)	p-FOXO1(S319)/FOXO4(S262)	0.01
p-PLCG2(Y759)	p-FOXO1(S319)/FOXO4(S262)	0.01
p-ERBB2(Y1221/1222)	p-MTOR(S2448)	0.01
p-ERBB2(Y1221/1222)	p-GAB1(Y627)	0.01
p-STAT1(Y701)	p-GAB1(Y627)	0.01
p-PLCG1(Y783)	p-GAB2(S159)	0.01
p-ABL(C-)(Y245)	p-GSK3A(S21)	0.01
p-EGFR(Y1086)	p-GSK3A(S21)	0.01
p-SAPK/JNK(T183/Y185)	p-GSK3A(S21)	0.01
p-SRC(Y527)	p-GSK3A(S21)	0.01
p-MET(Y1234/1235)	p-IGF1RB(Y1135/1136)/INSRB	0.01
p-SHP2(Y542)	p-IGF1RB(Y1135/1136)/INSRB	0.01
p-RAF(C-)(S259)	p-IGF1RB(Y1135/1136)/INSRB	0.01
p-S6RIBPROT(S240/244)	p-IGF1RB(Y1135/1136)/INSRB	0.01
p-PLCG2(Y759)	p-IRS1(S1101)	0.01
p-EGFR(Y845)	p-JAK1(Y1022/1023)	0.01
p-P90RSK(S380)	p-JAK1(Y1022/1023)	0.01
p-ERBB4(Y1284)	p-KIT(C-)(Y719)	0.01
p-FOXO1(S319)/FOXO4(S262)	p-KIT(C-)(Y719)	0.01
p-PDFGRA(Y849)/PDGFRB(Y857)	p-KIT(C-)(Y719)	0.01
p-SHC(Y239/240)	p-KIT(C-)(Y719)	0.01
p-IGF1RB(Y1135/1136)/INSRB	p-MEK(1/2)(S217/221)	0.01
p-RAF(C-)(S338)	p-MEK(1/2)(S217/221)	0.01
p-CDK2(T160)	p-ERK1/2(T202/Y204)	0.01
p-PYK2(Y402)	p-P38MAPK(T180/Y182)	0.01
p-CREB(S133)	p-SAPK/JNK(T183/Y185)	0.01
p-CRKL(Y207)	p-SAPK/JNK(T183/Y185)	0.01
p-FOXO3A(S253)	p-MET(Y1234/1235)	0.01
p-CRKII(Y221)	p-MET(Y1349)	0.01
p-FOXO1(S319)/FOXO4(S262)	p-MET(Y1349)	0.01
p-ERBB4(Y1284)	p-PDGFRA(Y754)	0.01
p-KIT(C-)(Y719)	p-PDGFRA(Y754)	0.01
p-CDK2(T160)	p-PDFGRA(Y849)/PDGFRB(Y857)	0.01
p-FGFR1(Y653/654)	p-PDFGRA(Y849)/PDGFRB(Y857)	0.01
p-SAPK/JNK(T183/Y185)	p-PDFGRA(Y849)/PDGFRB(Y857)	0.01
p-P70S6K(T421/S424)	p-PDFGRA(Y849)/PDGFRB(Y857)	0.01
p-PLCG1(Y783)	p-PDK1(S241)	0.01
p-S6RIBPROT(S240/244)	p-PDK1(S241)	0.01
p-4EBP1(T37/46)	p-PLCG1(Y783)	0.01
p-STAT5(Y694)	p-PLCG1(Y783)	0.01
p-CDC2(Y15)	p-PLCG2(Y759)	0.01
p-EGFR(Y845)	p-PKCD(T505)	0.01
p-KIT(C-)(Y719)	p-PKCD(T505)	0.01
p-SRC(Y416)	p-PKCD(T505)	0.01
p-STAT5(Y694)	p-PKCD(T505)	0.01
p-SYK(Y525/526)	p-PKCD(T505)	0.01
p-ZAP70(Y319)/SYK(Y352)	p-PKCD(T505)	0.01
p-4EBP1(S65)	p-PTEN(S380)	0.01
p-FGFR1(Y653/654)	p-PTEN(S380)	0.01
p-FOXO1(S319)/FOXO4(S262)	p-PTEN(S380)	0.01
p-JAK1(Y1022/1023)	p-PTEN(S380)	0.01
p-PI3KP85(Y458)P55(Y199)	p-PTEN(S380)	0.01
p-IRS1(S1101)	p-FAK(Y576/577)	0.01
p-SAPK/JNK(T183/Y185)	p-FAK(Y576/577)	0.01
p-KIT(C-)(Y719)	p-PYK2(Y402)	0.01
p-S6RIBPROT(S240/244)	p-PYK2(Y402)	0.01
p-STAT5(Y694)	p-PYK2(Y402)	0.01
p-CDC2(Y15)	p-RAF(C-)(S259)	0.01
p-FGFR1(Y653/654)	p-RAF(C-)(S338)	0.01
p-MET(Y1234/1235)	p-RAF(C-)(S338)	0.01
p-ERBB4(Y1284)	p-S6RIBPROT(S240/244)	0.01
p-GAB1(Y627)	p-S6RIBPROT(S240/244)	0.01
p-KIT(C-)(Y719)	p-S6RIBPROT(S240/244)	0.01
p-STAT3(S727)	p-S6RIBPROT(S240/244)	0.01
p-P38MAPK(T180/Y182)	p-P90RSK(S380)	0.01
p-SRC(Y416)	p-P90RSK(S380)	0.01
p-STAT5(Y694)	p-P90RSK(S380)	0.01
p-4EBP1(S65)	p-P70S6K(T421/S424)	0.01
p-SAPK/JNK(T183/Y185)	p-P70S6K(T421/S424)	0.01
p-PKCD(T505)	p-P70S6K(T421/S424)	0.01
p-SRC(Y416)	p-P70S6K(T421/S424)	0.01
p-RAF(C-)(S259)	p-SHC(Y239/240)	0.01
p-PTEN(S380)	p-SRC(Y416)	0.01
p-EGFR(Y1068)	p-SRC(Y527)	0.01
p-FOXO1(S319)/FOXO4(S262)	p-SRC(Y527)	0.01
p-RAF(C-)(S338)	p-SRC(Y527)	0.01
p-MTOR(S2448)	p-STAT1(Y701)	0.01
p-MEK(1/2)(S217/221)	p-STAT1(Y701)	0.01
p-PKCD(T505)	p-STAT1(Y701)	0.01
p-PLCG2(Y759)	p-STAT3(S727)	0.01
p-CRKL(Y207)	p-STAT3(Y705)	0.01
p-GAB1(Y627)	p-STAT3(Y705)	0.01
p-GSK3A(S21)	p-STAT3(Y705)	0.01
p-MEK(1/2)(S217/221)	p-STAT5(Y694)	0.01
p-PYK2(Y402)	p-STAT5(Y694)	0.01
p-EGFR(Y845)	p-STAT6(Y641)	0.01
p-FOXO3A(S253)	p-STAT6(Y641)	0.01
p-ABL(C-)(Y245)	p-SYK(Y525/526)	0.01
p-ERK1/2(T202/Y204)	p-SYK(Y525/526)	0.01
p-STAT5(Y694)	p-SYK(Y525/526)	0.01
p-AKT(S473)	p-ZAP70(Y319)/SYK(Y352)	0.01
p-MEK(1/2)(S217/221)	p-ZAP70(Y319)/SYK(Y352)	0.01
p-PKCD(T505)	p-ZAP70(Y319)/SYK(Y352)	0.01
p-S6RIBPROT(S240/244)	p-ZAP70(Y319)/SYK(Y352)	0.01
p-PDK1(S241)	p-ABL(C-)(Y245)	0.008
p-CDC2(Y15)	p-AKT(S473)	0.008
p-CDK2(T160)	p-AKT(S473)	0.008
p-ERBB2(Y1221/1222)	p-AKT(S473)	0.008
p-ERK1/2(T202/Y204)	p-AKT(S473)	0.008
p-SHP2(Y542)	p-AKT(S473)	0.008
p-STAT5(Y694)	p-AKT(S473)	0.008
p-FAK(Y576/577)	p-CDC2(Y15)	0.008
p-FOXO1(S319)/FOXO4(S262)	p-CREB(S133)	0.008
p-KIT(C-)(Y719)	p-CREB(S133)	0.008
p-PDK1(S241)	p-CREB(S133)	0.008
p-CDC2(Y15)	p-CRKL(Y207)	0.008
p-SHP2(Y542)	p-CRKL(Y207)	0.008
p-CDK2(T160)	p-EGFR(Y1068)	0.008
p-PKCD(T505)	p-EGFR(Y1068)	0.008
p-PYK2(Y402)	p-EGFR(Y1068)	0.008
p-SYK(Y525/526)	p-EGFR(Y1068)	0.008
p-PDFGRA(Y849)/PDGFRB(Y857)	p-4EBP1(S65)	0.008
p-STAT3(Y705)	p-4EBP1(S65)	0.008
p-CRKII(Y221)	p-4EBP1(T37/46)	0.008
p-FOXO3A(S253)	p-4EBP1(T37/46)	0.008
p-PDGFRB(Y1009)	p-4EBP1(T37/46)	0.008
p-PKCD(T505)	p-4EBP1(T37/46)	0.008
p-S6RIBPROT(S240/244)	p-4EBP1(T37/46)	0.008
p-MTOR(S2448)	p-ERBB2(Y1221/1222)	0.008
p-PKCD(T505)	p-ERBB4(Y1284)	0.008
p-PDGFRA(Y754)	p-FGFR1(Y653/654)	0.008
p-PDFGRA(Y849)/PDGFRB(Y857)	p-FGFR1(Y653/654)	0.008
p-RAF(C-)(S259)	p-FGFR1(Y653/654)	0.008
p-FOXO3A(S253)	p-FOXO1(S319)/FOXO4(S262)	0.008
p-MET(Y1349)	p-FOXO1(S319)/FOXO4(S262)	0.008
p-GAB1(Y627)	p-FOXO3A(S253)	0.008
p-MEK(1/2)(S217/221)	p-FOXO3A(S253)	0.008
p-PDGFRB(Y1009)	p-FOXO3A(S253)	0.008
p-SHP2(Y542)	p-FOXO3A(S253)	0.008
p-JAK1(Y1022/1023)	p-MTOR(S2448)	0.008
p-MET(Y1234/1235)	p-MTOR(S2448)	0.008
p-PI3KP85(Y458)P55(Y199)	p-MTOR(S2448)	0.008
p-P70S6K(T421/S424)	p-GAB1(Y627)	0.008
p-EGFR(Y1068)	p-GAB2(S159)	0.008
p-AKT(S473)	p-GSK3A(S21)	0.008
p-KIT(C-)(Y719)	p-GSK3A(S21)	0.008
p-SHC(Y239/240)	p-GSK3A(S21)	0.008
p-FGFR1(Y653/654)	p-IGF1RB(Y1135/1136)/INSRB	0.008
p-SHC(Y239/240)	p-IGF1RB(Y1135/1136)/INSRB	0.008
p-SYK(Y525/526)	p-IGF1RB(Y1135/1136)/INSRB	0.008
p-MEK(1/2)(S217/221)	p-IRS1(S1101)	0.008
p-SRC(Y416)	p-IRS1(S1101)	0.008
p-CDK2(T160)	p-JAK1(Y1022/1023)	0.008
p-EGFR(Y1068)	p-JAK1(Y1022/1023)	0.008
p-GAB1(Y627)	p-JAK1(Y1022/1023)	0.008
p-ERK1/2(T202/Y204)	p-JAK1(Y1022/1023)	0.008
p-RAF(C-)(S338)	p-KIT(C-)(Y719)	0.008
p-FAK(Y576/577)	p-MEK(1/2)(S217/221)	0.008
p-SRC(Y416)	p-MEK(1/2)(S217/221)	0.008
p-MET(Y1234/1235)	p-ERK1/2(T202/Y204)	0.008
p-ERBB4(Y1284)	p-P38MAPK(T180/Y182)	0.008
p-S6RIBPROT(S240/244)	p-SAPK/JNK(T183/Y185)	0.008
p-ABL(C-)(Y245)	p-MET(Y1349)	0.008
p-CDC2(Y15)	p-MET(Y1349)	0.008
p-MET(Y1234/1235)	p-MET(Y1349)	0.008
p-RAF(C-)(S338)	p-MET(Y1349)	0.008
p-P90RSK(S380)	p-MET(Y1349)	0.008
p-CRKL(Y207)	p-PDFGRA(Y849)/PDGFRB(Y857)	0.008
p-EGFR(Y1068)	p-PDFGRA(Y849)/PDGFRB(Y857)	0.008
p-PTEN(S380)	p-PDFGRA(Y849)/PDGFRB(Y857)	0.008
p-FGFR1(Y653/654)	p-PDGFRB(Y1009)	0.008
p-ABL(C-)(Y245)	p-PDK1(S241)	0.008
p-PKCD(T505)	p-PI3KP85(Y458)P55(Y199)	0.008
p-FAK(Y576/577)	p-PI3KP85(Y458)P55(Y199)	0.008
p-STAT6(Y641)	p-PI3KP85(Y458)P55(Y199)	0.008
p-ERBB4(Y1284)	p-PLCG1(Y783)	0.008
p-MEK(1/2)(S217/221)	p-PLCG1(Y783)	0.008
p-ERK1/2(T202/Y204)	p-PLCG1(Y783)	0.008
p-PTEN(S380)	p-PLCG2(Y759)	0.008
p-RAF(C-)(S338)	p-PLCG2(Y759)	0.008
p-EGFR(Y845)	p-PKCPAN/G(T514)	0.008
p-ERBB2(Y1221/1222)	p-PKCPAN/G(T514)	0.008
p-IGF1RB(Y1135/1136)/INSRB	p-PKCPAN/G(T514)	0.008
p-RAF(C-)(S338)	p-PKCPAN/G(T514)	0.008
p-STAT6(Y641)	p-PKCPAN/G(T514)	0.008
[truncated: 1,602 more rows]
