# Supplementary material for: The DIONESUS algorithm provides scalable and accurate reconstruction of dynamic phosphoproteomic networks to reveal new drug targets
Source: Royal Society of Chemistry journal article supplement (doi:10.1039/c5ib00065c), 2015-01-01
Supplement: c5ib00065c4.xlsx [file c5ib00065c4.xlsx]

## Sheet: MicrowesternArray-Network2-A431
Table 11. Edge List (DIONESUS) - only phosphosites
Parent	Daughter	Edge Confidence (Normalized VIP score)
p-CDC2(Y15)	p-PDGFRA(Y754)	8.8812
p-MET(Y1234/1235)	p-GAB1(Y627)	7.0806
p-ERBB2(Y1221/1222)	p-CRKII(Y221)	5.6148
p-PYK2(Y402)	p-GAB1(Y627)	5.2849
p-RAF(C-)(S338)	p-CRKII(Y221)	5.2303
p-JAK1(Y1022/1023)	p-ZAP70(Y319)/SYK(Y352)	5.2022
p-EGFR(Y1068)	p-MET(Y1349)	5.0345
p-ERBB4(Y1284)	p-ZAP70(Y319)/SYK(Y352)	4.9741
p-RAF(C-)(S338)	p-RAF(C-)(S259)	4.9666
p-STAT5(Y694)	p-KIT(C-)(Y719)	4.8899
p-STAT3(Y705)	p-ZAP70(Y319)/SYK(Y352)	4.8641
p-PYK2(Y402)	p-PDFGRA(Y849)/PDGFRB(Y857)	4.8353
p-PYK2(Y402)	p-SHP2(Y542)	4.7939
p-RAF(C-)(S259)	p-RAF(C-)(S338)	4.7897
p-PDGFRA(Y754)	p-CDC2(Y15)	4.7619
p-KIT(C-)(Y719)	p-STAT5(Y694)	4.6884
p-STAT1(Y701)	p-CDC2(Y15)	4.5928
p-ERK1/2(T202/Y204)	p-CDC2(Y15)	4.465
p-CRKII(Y221)	p-RAF(C-)(S338)	4.4458
p-AKT(S473)	p-P90RSK(S380)	4.427
p-ERK1/2(T202/Y204)	p-MEK(1/2)(S217/221)	4.3407
p-ABL(C-)(Y245)	p-RAF(C-)(S259)	4.3356
p-GSK3A(S21)	p-IRS1(S1101)	4.3069
p-GSK3A(S21)	p-RAF(C-)(S338)	4.2773
p-PKCPAN/G(T514)	p-CRKII(Y221)	4.265
p-ERBB4(Y1284)	p-PDFGRA(Y849)/PDGFRB(Y857)	4.2367
p-ZAP70(Y319)/SYK(Y352)	p-JAK1(Y1022/1023)	4.2348
p-CREB(S133)	p-CRKL(Y207)	4.231
p-JAK1(Y1022/1023)	p-PDFGRA(Y849)/PDGFRB(Y857)	4.2258
p-FAK(Y576/577)	p-MTOR(S2448)	4.2127
p-FOXO3A(S253)	p-MTOR(S2448)	4.1976
p-4EBP1(S65)	p-4EBP1(T37/46)	4.1792
p-PDGFRB(Y1009)	p-SHP2(Y542)	4.1696
p-GSK3A(S21)	p-RAF(C-)(S259)	4.154
p-STAT1(Y701)	p-PDFGRA(Y849)/PDGFRB(Y857)	4.1084
p-CRKL(Y207)	p-CREB(S133)	4.0942
p-EGFR(Y845)	p-PLCG1(Y783)	4.0793
p-PYK2(Y402)	p-SRC(Y416)	4.0391
p-ZAP70(Y319)/SYK(Y352)	p-PDK1(S241)	4.0318
p-AKT(S473)	p-PKCPAN/G(T514)	4.0254
p-P38MAPK(T180/Y182)	p-MTOR(S2448)	4.0204
p-ERBB4(Y1284)	p-JAK1(Y1022/1023)	4.0008
p-MET(Y1234/1235)	p-PLCG1(Y783)	3.9961
p-MET(Y1234/1235)	p-SRC(Y416)	3.9907
p-PKCPAN/G(T514)	p-AKT(S473)	3.9855
p-PDFGRA(Y849)/PDGFRB(Y857)	p-PYK2(Y402)	3.9619
p-SHP2(Y542)	p-4EBP1(T37/46)	3.8977
p-SRC(Y416)	p-PYK2(Y402)	3.8971
p-PKCPAN/G(T514)	p-P90RSK(S380)	3.8856
p-ABL(C-)(Y245)	p-RAF(C-)(S338)	3.8818
p-SYK(Y525/526)	p-SRC(Y416)	3.8772
p-SYK(Y525/526)	p-PYK2(Y402)	3.8634
p-PKCPAN/G(T514)	p-S6RIBPROT(S240/244)	3.8564
p-STAT6(Y641)	p-PYK2(Y402)	3.8255
p-MET(Y1234/1235)	p-PYK2(Y402)	3.8234
p-MTOR(S2448)	p-FOXO3A(S253)	3.8084
p-SYK(Y525/526)	p-PLCG1(Y783)	3.8051
p-STAT3(Y705)	p-JAK1(Y1022/1023)	3.8038
p-AKT(S473)	p-S6RIBPROT(S240/244)	3.7934
p-S6RIBPROT(S240/244)	p-PKCPAN/G(T514)	3.7809
p-EGFR(Y845)	p-SRC(Y416)	3.7692
p-STAT3(Y705)	p-FAK(Y576/577)	3.7669
p-PLCG2(Y759)	p-PLCG1(Y783)	3.7632
p-PDGFRA(Y754)	p-4EBP1(T37/46)	3.7558
p-EGFR(Y1086)	p-EGFR(Y1068)	3.7487
p-SAPK/JNK(T183/Y185)	p-SHP2(Y542)	3.748
p-RAF(C-)(S338)	p-GSK3A(S21)	3.7288
p-EGFR(Y1173)	p-PLCG1(Y783)	3.7173
p-EGFR(Y1086)	p-KIT(C-)(Y719)	3.7163
p-CRKL(Y207)	p-FOXO3A(S253)	3.7125
p-IRS1(S1101)	p-RAF(C-)(S259)	3.7085
p-RAF(C-)(S259)	p-IRS1(S1101)	3.6959
p-ERBB2(Y1221/1222)	p-SRC(Y416)	3.6861
p-EGFR(Y1086)	p-STAT1(Y701)	3.6748
p-STAT6(Y641)	p-STAT1(Y701)	3.6658
p-GAB2(S159)	p-IRS1(S1101)	3.6639
p-STAT1(Y701)	p-JAK1(Y1022/1023)	3.6637
p-EGFR(Y1086)	p-STAT5(Y694)	3.6583
p-S6RIBPROT(S240/244)	p-AKT(S473)	3.6419
p-MET(Y1234/1235)	p-EGFR(Y1173)	3.64
p-PDFGRA(Y849)/PDGFRB(Y857)	p-JAK1(Y1022/1023)	3.6394
p-PLCG2(Y759)	p-FAK(Y576/577)	3.6298
p-FOXO3A(S253)	p-CRKL(Y207)	3.6282
p-IRS1(S1101)	p-GSK3A(S21)	3.6264
p-P38MAPK(T180/Y182)	p-FOXO3A(S253)	3.6194
p-FGFR1(Y653/654)	p-KIT(C-)(Y719)	3.6124
p-FOXO3A(S253)	p-IRS1(S1101)	3.6109
p-PKCPAN/G(T514)	p-P70S6K(T421/S424)	3.6053
p-PDGFRA(Y754)	p-4EBP1(S65)	3.5963
p-FGFR1(Y653/654)	p-STAT6(Y641)	3.5928
p-PLCG2(Y759)	p-STAT6(Y641)	3.5913
p-S6RIBPROT(S240/244)	p-P90RSK(S380)	3.5909
p-FGFR1(Y653/654)	p-STAT5(Y694)	3.5647
p-FGFR1(Y653/654)	p-FAK(Y576/577)	3.5628
p-EGFR(Y845)	p-EGFR(Y1173)	3.5535
p-MET(Y1234/1235)	p-EGFR(Y845)	3.549
p-PLCG2(Y759)	p-EGFR(Y1173)	3.5464
p-EGFR(Y1086)	p-STAT6(Y641)	3.5422
p-PI3KP85(Y458)P55(Y199)	p-CRKL(Y207)	3.5307
p-EGFR(Y1173)	p-EGFR(Y1068)	3.5249
p-JAK1(Y1022/1023)	p-STAT1(Y701)	3.5248
p-PLCG2(Y759)	p-KIT(C-)(Y719)	3.5199
p-4EBP1(S65)	p-CDC2(Y15)	3.5199
p-ERBB4(Y1284)	p-FAK(Y576/577)	3.5184
p-PLCG1(Y783)	p-EGFR(Y845)	3.5154
p-STAT3(S727)	p-MTOR(S2448)	3.4999
p-STAT6(Y641)	p-FAK(Y576/577)	3.4903
p-P38MAPK(T180/Y182)	p-MEK(1/2)(S217/221)	3.4887
p-RAF(C-)(S259)	p-GSK3A(S21)	3.4867
p-P38MAPK(T180/Y182)	p-CRKL(Y207)	3.4839
p-PYK2(Y402)	p-STAT6(Y641)	3.4806
p-MET(Y1349)	p-EGFR(Y1068)	3.4641
p-FAK(Y576/577)	p-KIT(C-)(Y719)	3.4624
p-CREB(S133)	p-FOXO3A(S253)	3.462
p-STAT1(Y701)	p-STAT5(Y694)	3.4616
p-STAT5(Y694)	p-STAT1(Y701)	3.4581
p-PYK2(Y402)	p-STAT1(Y701)	3.4415
p-STAT3(Y705)	p-STAT6(Y641)	3.4405
p-CRKL(Y207)	p-PI3KP85(Y458)P55(Y199)	3.4386
p-FAK(Y576/577)	p-ABL(C-)(Y245)	3.4365
p-FGFR1(Y653/654)	p-EGFR(Y1086)	3.4352
p-PI3KP85(Y458)P55(Y199)	p-PDGFRB(Y1009)	3.4317
p-SYK(Y525/526)	p-STAT6(Y641)	3.4309
p-PDGFRB(Y1009)	p-PI3KP85(Y458)P55(Y199)	3.4308
p-PDGFRB(Y1009)	p-MEK(1/2)(S217/221)	3.4277
p-SHP2(Y542)	p-PDGFRB(Y1009)	3.427
p-SYK(Y525/526)	p-EGFR(Y845)	3.4069
p-STAT6(Y641)	p-EGFR(Y1086)	3.4056
p-CREB(S133)	p-PI3KP85(Y458)P55(Y199)	3.4028
p-JAK1(Y1022/1023)	p-ERBB4(Y1284)	3.4002
p-STAT3(Y705)	p-ABL(C-)(Y245)	3.3997
p-SRC(Y527)	p-SHP2(Y542)	3.3942
p-PLCG1(Y783)	p-EGFR(Y1173)	3.3924
p-STAT3(Y705)	p-ERBB4(Y1284)	3.3884
p-STAT5(Y694)	p-ABL(C-)(Y245)	3.3882
p-ERBB4(Y1284)	p-ABL(C-)(Y245)	3.3832
p-SHC(Y239/240)	p-MTOR(S2448)	3.3647
p-IGF1RB(Y1135/1136)/INSRB	p-IRS1(S1101)	3.3615
p-SRC(Y527)	p-PTEN(S380)	3.3523
p-RAF(C-)(S259)	p-ABL(C-)(Y245)	3.3511
p-FAK(Y576/577)	p-ERBB4(Y1284)	3.3498
p-SAPK/JNK(T183/Y185)	p-PTEN(S380)	3.3361
p-PLCG2(Y759)	p-FGFR1(Y653/654)	3.3345
p-CDK2(T160)	p-FOXO3A(S253)	3.323
p-PI3KP85(Y458)P55(Y199)	p-CREB(S133)	3.3166
p-SHC(Y239/240)	p-STAT3(S727)	3.316
p-PLCG2(Y759)	p-EGFR(Y1086)	3.3129
p-PDFGRA(Y849)/PDGFRB(Y857)	p-STAT1(Y701)	3.3035
p-EGFR(Y1086)	p-FGFR1(Y653/654)	3.3001
p-P90RSK(S380)	p-AKT(S473)	3.2918
p-ZAP70(Y319)/SYK(Y352)	p-ERBB4(Y1284)	3.2907
p-4EBP1(T37/46)	p-4EBP1(S65)	3.2817
p-STAT6(Y641)	p-FGFR1(Y653/654)	3.2777
p-SHC(Y239/240)	p-MEK(1/2)(S217/221)	3.2764
p-STAT1(Y701)	p-EGFR(Y1086)	3.2633
p-STAT3(Y705)	p-FGFR1(Y653/654)	3.2631
p-CDK2(T160)	p-CRKL(Y207)	3.2574
p-EGFR(Y1173)	p-EGFR(Y845)	3.2532
p-AKT(S473)	p-P70S6K(T421/S424)	3.2443
p-CREB(S133)	p-P70S6K(T421/S424)	3.2382
p-GSK3A(S21)	p-PDK1(S241)	3.2381
p-S6RIBPROT(S240/244)	p-P70S6K(T421/S424)	3.2328
p-SRC(Y416)	p-EGFR(Y845)	3.2245
p-EGFR(Y845)	p-EGFR(Y1068)	3.2212
p-ERBB2(Y1221/1222)	p-ERBB4(Y1284)	3.2183
p-SRC(Y416)	p-EGFR(Y1068)	3.2066
p-STAT5(Y694)	p-4EBP1(T37/46)	3.2043
p-GAB2(S159)	p-GSK3A(S21)	3.1974
p-PI3KP85(Y458)P55(Y199)	p-P70S6K(T421/S424)	3.197
p-SRC(Y527)	p-SAPK/JNK(T183/Y185)	3.1847
p-FOXO3A(S253)	p-CREB(S133)	3.1811
p-SHP2(Y542)	p-SAPK/JNK(T183/Y185)	3.1801
p-FAK(Y576/577)	p-FGFR1(Y653/654)	3.1778
p-SYK(Y525/526)	p-ERBB2(Y1221/1222)	3.1758
p-S6RIBPROT(S240/244)	p-PI3KP85(Y458)P55(Y199)	3.1704
p-SAPK/JNK(T183/Y185)	p-P90RSK(S380)	3.1673
p-P70S6K(T421/S424)	p-PKCPAN/G(T514)	3.1563
p-EGFR(Y1068)	p-EGFR(Y1173)	3.1523
p-MET(Y1234/1235)	p-FGFR1(Y653/654)	3.1467
p-SRC(Y527)	p-SHC(Y239/240)	3.1385
p-MTOR(S2448)	p-P38MAPK(T180/Y182)	3.1377
p-PI3KP85(Y458)P55(Y199)	p-S6RIBPROT(S240/244)	3.131
p-AKT(S473)	p-FOXO1(S319)/FOXO4(S262)	3.1192
p-FOXO3A(S253)	p-CDK2(T160)	3.1159
p-SYK(Y525/526)	p-FGFR1(Y653/654)	3.1129
p-STAT3(S727)	p-FOXO3A(S253)	3.1121
p-PKCPAN/G(T514)	p-FOXO1(S319)/FOXO4(S262)	3.1089
p-JAK1(Y1022/1023)	p-4EBP1(S65)	3.1069
p-FOXO3A(S253)	p-P38MAPK(T180/Y182)	3.1056
p-GSK3A(S21)	p-GAB2(S159)	3.0969
p-STAT5(Y694)	p-EGFR(Y1086)	3.0946
p-PDFGRA(Y849)/PDGFRB(Y857)	p-ERBB4(Y1284)	3.0945
p-PKCPAN/G(T514)	p-PI3KP85(Y458)P55(Y199)	3.0925
p-FAK(Y576/577)	p-STAT3(Y705)	3.0893
p-KIT(C-)(Y719)	p-EGFR(Y1086)	3.0836
p-FOXO3A(S253)	p-STAT3(S727)	3.0826
p-AKT(S473)	p-PI3KP85(Y458)P55(Y199)	3.0824
p-ABL(C-)(Y245)	p-FAK(Y576/577)	3.0779
p-P38MAPK(T180/Y182)	p-CREB(S133)	3.073
p-PI3KP85(Y458)P55(Y199)	p-AKT(S473)	3.071
p-PI3KP85(Y458)P55(Y199)	p-PKCPAN/G(T514)	3.0652
p-CDK2(T160)	p-P70S6K(T421/S424)	3.0624
p-STAT3(S727)	p-SHC(Y239/240)	3.0619
p-RAF(C-)(S338)	p-ABL(C-)(Y245)	3.0615
p-CRKII(Y221)	p-ERBB2(Y1221/1222)	3.0534
p-PTEN(S380)	p-SHP2(Y542)	3.04
p-CRKL(Y207)	p-P38MAPK(T180/Y182)	3.04
p-CDC2(Y15)	p-4EBP1(S65)	3.0384
p-MET(Y1234/1235)	p-ERBB2(Y1221/1222)	3.0297
p-PTEN(S380)	p-SAPK/JNK(T183/Y185)	3.0275
p-SRC(Y527)	p-MEK(1/2)(S217/221)	3.0236
p-SHC(Y239/240)	p-PTEN(S380)	3.0206
p-ABL(C-)(Y245)	p-STAT5(Y694)	3.0179
p-EGFR(Y1173)	p-MET(Y1349)	3.016
p-PDGFRB(Y1009)	p-STAT3(S727)	3.0149
p-CRKL(Y207)	p-P70S6K(T421/S424)	3.0076
p-MEK(1/2)(S217/221)	p-PDGFRB(Y1009)	3.0061
p-IGF1RB(Y1135/1136)/INSRB	p-GSK3A(S21)	3.0054
p-EGFR(Y845)	p-MET(Y1234/1235)	3.0031
p-CREB(S133)	p-CDK2(T160)	3.002
p-EGFR(Y1068)	p-EGFR(Y1086)	2.9989
p-SRC(Y527)	p-PDGFRB(Y1009)	2.9958
p-STAT6(Y641)	p-ERBB2(Y1221/1222)	2.9939
p-IRS1(S1101)	p-GAB2(S159)	2.9888
p-P70S6K(T421/S424)	p-AKT(S473)	2.9826
p-CRKL(Y207)	p-CDK2(T160)	2.9824
p-MTOR(S2448)	p-STAT3(S727)	2.9802
p-CDK2(T160)	p-CREB(S133)	2.978
p-P70S6K(T421/S424)	p-PI3KP85(Y458)P55(Y199)	2.9694
p-PDGFRB(Y1009)	p-SHC(Y239/240)	2.9603
p-FGFR1(Y653/654)	p-ERBB2(Y1221/1222)	2.9532
p-ERBB4(Y1284)	p-ERBB2(Y1221/1222)	2.9518
p-STAT3(Y705)	p-ERBB2(Y1221/1222)	2.9507
p-PDGFRB(Y1009)	p-PTEN(S380)	2.9505
p-PLCG1(Y783)	p-CREB(S133)	2.9479
p-SAPK/JNK(T183/Y185)	p-SRC(Y527)	2.9445
p-P90RSK(S380)	p-PKCPAN/G(T514)	2.9384
p-CRKII(Y221)	p-AKT(S473)	2.9335
p-SYK(Y525/526)	p-MET(Y1234/1235)	2.9319
p-CRKII(Y221)	p-PKCPAN/G(T514)	2.9239
p-P90RSK(S380)	p-SAPK/JNK(T183/Y185)	2.9202
p-FOXO1(S319)/FOXO4(S262)	p-P90RSK(S380)	2.9198
p-P70S6K(T421/S424)	p-S6RIBPROT(S240/244)	2.9184
p-FAK(Y576/577)	p-PLCG2(Y759)	2.9136
p-FGFR1(Y653/654)	p-PLCG2(Y759)	2.9121
p-P38MAPK(T180/Y182)	p-STAT3(S727)	2.9055
p-SHC(Y239/240)	p-PDGFRB(Y1009)	2.9009
p-SRC(Y416)	p-ERBB2(Y1221/1222)	2.9001
p-STAT3(Y705)	p-PLCG2(Y759)	2.8943
p-P70S6K(T421/S424)	p-CREB(S133)	2.8797
p-PKCD(T505)	p-STAT3(S727)	2.8791
p-PKCD(T505)	p-PDK1(S241)	2.8706
p-FGFR1(Y653/654)	p-STAT3(Y705)	2.87
p-STAT6(Y641)	p-PLCG2(Y759)	2.8654
p-GSK3A(S21)	p-IGF1RB(Y1135/1136)/INSRB	2.8498
p-ABL(C-)(Y245)	p-ERBB4(Y1284)	2.8428
p-PLCG1(Y783)	p-MET(Y1234/1235)	2.8397
p-STAT6(Y641)	p-STAT3(Y705)	2.8339
p-MEK(1/2)(S217/221)	p-SHC(Y239/240)	2.8331
p-ERBB4(Y1284)	p-STAT3(Y705)	2.8317
p-MET(Y1234/1235)	p-PLCG2(Y759)	2.828
p-ERBB2(Y1221/1222)	p-SYK(Y525/526)	2.822
p-SRC(Y527)	p-4EBP1(T37/46)	2.8183
p-MET(Y1234/1235)	p-SYK(Y525/526)	2.8084
p-SHC(Y239/240)	p-SRC(Y527)	2.8078
p-SRC(Y527)	p-CRKL(Y207)	2.8063
p-STAT3(S727)	p-PDGFRB(Y1009)	2.8063
p-P90RSK(S380)	p-S6RIBPROT(S240/244)	2.806
p-PLCG2(Y759)	p-MET(Y1234/1235)	2.8009
p-PI3KP85(Y458)P55(Y199)	p-P38MAPK(T180/Y182)	2.7915
p-PLCG2(Y759)	p-STAT3(Y705)	2.7914
p-PTEN(S380)	p-SRC(Y527)	2.7868
p-SYK(Y525/526)	p-PLCG2(Y759)	2.7838
p-PTEN(S380)	p-PDGFRB(Y1009)	2.7819
p-ZAP70(Y319)/SYK(Y352)	p-STAT3(Y705)	2.7787
p-CRKII(Y221)	p-S6RIBPROT(S240/244)	2.7668
p-S6RIBPROT(S240/244)	p-FOXO1(S319)/FOXO4(S262)	2.7636
p-CRKII(Y221)	p-FOXO1(S319)/FOXO4(S262)	2.7572
p-P70S6K(T421/S424)	p-CDK2(T160)	2.7564
p-PTEN(S380)	p-SHC(Y239/240)	2.7551
p-EGFR(Y1173)	p-MET(Y1234/1235)	2.7507
p-CREB(S133)	p-P38MAPK(T180/Y182)	2.7474
p-SHC(Y239/240)	p-SAPK/JNK(T183/Y185)	2.7463
p-GAB2(S159)	p-IGF1RB(Y1135/1136)/INSRB	2.745
p-PTEN(S380)	p-MEK(1/2)(S217/221)	2.7424
p-FGFR1(Y653/654)	p-MET(Y1234/1235)	2.7415
p-ERBB2(Y1221/1222)	p-MET(Y1234/1235)	2.7406
p-SRC(Y416)	p-MET(Y1234/1235)	2.74
p-PYK2(Y402)	p-MET(Y1234/1235)	2.7378
p-MEK(1/2)(S217/221)	p-P38MAPK(T180/Y182)	2.7319
p-EGFR(Y1086)	p-PLCG2(Y759)	2.7258
p-PDGFRB(Y1009)	p-SAPK/JNK(T183/Y185)	2.7246
p-GAB1(Y627)	p-MET(Y1349)	2.7235
p-SAPK/JNK(T183/Y185)	p-SHC(Y239/240)	2.7223
p-IGF1RB(Y1135/1136)/INSRB	p-GAB2(S159)	2.7155
p-MET(Y1234/1235)	p-STAT3(Y705)	2.7061
p-PDK1(S241)	p-GSK3A(S21)	2.7035
p-P38MAPK(T180/Y182)	p-SHC(Y239/240)	2.6982
p-IRS1(S1101)	p-IGF1RB(Y1135/1136)/INSRB	2.6947
p-EGFR(Y1173)	p-PLCG2(Y759)	2.6945
p-GSK3A(S21)	p-4EBP1(S65)	2.6905
p-SYK(Y525/526)	p-STAT3(Y705)	2.6897
p-ERBB2(Y1221/1222)	p-STAT3(Y705)	2.6879
p-P90RSK(S380)	p-FOXO1(S319)/FOXO4(S262)	2.6785
p-SRC(Y416)	p-SYK(Y525/526)	2.6761
p-MTOR(S2448)	p-SHC(Y239/240)	2.6717
p-PLCG1(Y783)	p-PLCG2(Y759)	2.6692
p-SRC(Y527)	p-P38MAPK(T180/Y182)	2.6687
p-PDGFRB(Y1009)	p-SRC(Y527)	2.6619
p-PI3KP85(Y458)P55(Y199)	p-CDK2(T160)	2.6613
p-PLCG2(Y759)	p-SYK(Y525/526)	2.6585
p-PYK2(Y402)	p-SYK(Y525/526)	2.6344
p-SRC(Y416)	p-MET(Y1349)	2.628
p-FGFR1(Y653/654)	p-SYK(Y525/526)	2.606
p-STAT6(Y641)	p-SYK(Y525/526)	2.6032
p-P38MAPK(T180/Y182)	p-SRC(Y527)	2.5909
p-P38MAPK(T180/Y182)	p-CDK2(T160)	2.586
p-SHC(Y239/240)	p-P38MAPK(T180/Y182)	2.5725
p-SAPK/JNK(T183/Y185)	p-PDGFRB(Y1009)	2.5692
p-EGFR(Y845)	p-SYK(Y525/526)	2.5686
p-EGFR(Y1068)	p-EGFR(Y845)	2.5675
p-PDGFRA(Y754)	p-IGF1RB(Y1135/1136)/INSRB	2.5619
p-STAT3(Y705)	p-SYK(Y525/526)	2.5467
p-PLCG1(Y783)	p-SYK(Y525/526)	2.5422
p-SRC(Y527)	p-STAT3(S727)	2.5361
p-CRKL(Y207)	p-SRC(Y527)	2.5159
p-FOXO1(S319)/FOXO4(S262)	p-AKT(S473)	2.509
p-FOXO1(S319)/FOXO4(S262)	p-PKCPAN/G(T514)	2.4886
p-PKCD(T505)	p-IGF1RB(Y1135/1136)/INSRB	2.4876
p-SRC(Y416)	p-FOXO1(S319)/FOXO4(S262)	2.4444
p-IRS1(S1101)	p-STAT3(S727)	2.4328
p-CDK2(T160)	p-PDK1(S241)	2.431
p-CDK2(T160)	p-P38MAPK(T180/Y182)	2.4269
p-MEK(1/2)(S217/221)	p-PTEN(S380)	2.4205
p-IGF1RB(Y1135/1136)/INSRB	p-4EBP1(S65)	2.4136
p-SHP2(Y542)	p-PTEN(S380)	2.4021
p-ERK1/2(T202/Y204)	p-SHC(Y239/240)	2.392
p-P38MAPK(T180/Y182)	p-4EBP1(S65)	2.3778
p-FOXO1(S319)/FOXO4(S262)	p-S6RIBPROT(S240/244)	2.34
p-MEK(1/2)(S217/221)	p-4EBP1(S65)	2.3176
p-FOXO3A(S253)	p-PDK1(S241)	2.3047
p-MEK(1/2)(S217/221)	p-SAPK/JNK(T183/Y185)	2.2793
p-SHP2(Y542)	p-SRC(Y527)	2.2766
p-IRS1(S1101)	p-PDK1(S241)	2.2621
p-RAF(C-)(S338)	p-PDK1(S241)	2.2566
p-MEK(1/2)(S217/221)	p-SRC(Y527)	2.2501
p-P90RSK(S380)	p-IGF1RB(Y1135/1136)/INSRB	2.1975
p-S6RIBPROT(S240/244)	p-CDK2(T160)	2.183
p-IRS1(S1101)	p-FOXO1(S319)/FOXO4(S262)	2.1727
p-PKCPAN/G(T514)	p-CDK2(T160)	2.1274
p-PI3KP85(Y458)P55(Y199)	p-SRC(Y527)	2.1174
p-GAB2(S159)	p-PDK1(S241)	2.0446
p-RAF(C-)(S259)	p-PDK1(S241)	2.0385
p-GAB2(S159)	p-FOXO1(S319)/FOXO4(S262)	2.0258
p-STAT3(S727)	p-SRC(Y527)	2.012
p-GAB2(S159)	p-MET(Y1349)	1.9823
p-STAT3(S727)	p-PTEN(S380)	1.9795
p-RAF(C-)(S259)	p-GAB2(S159)	1.9787
p-4EBP1(S65)	p-IGF1RB(Y1135/1136)/INSRB	1.9675
p-RAF(C-)(S338)	p-GAB2(S159)	1.9427
p-PTEN(S380)	p-STAT3(S727)	1.9278
p-SHP2(Y542)	p-GAB2(S159)	1.9115
p-SAPK/JNK(T183/Y185)	p-FOXO1(S319)/FOXO4(S262)	1.9068
p-PDK1(S241)	p-CDK2(T160)	1.8589
p-SAPK/JNK(T183/Y185)	p-GAB2(S159)	1.8574
p-SRC(Y527)	p-CDK2(T160)	1.8515
p-ABL(C-)(Y245)	p-SRC(Y527)	1.7933
p-ABL(C-)(Y245)	p-PTEN(S380)	1.691
p-PDGFRA(Y754)	p-GAB2(S159)	1.6865
p-GAB2(S159)	p-SAPK/JNK(T183/Y185)	1.6777
p-PDK1(S241)	p-GAB2(S159)	1.6391
p-STAT3(Y705)	p-PTEN(S380)	1.6262
p-SHC(Y239/240)	p-MET(Y1349)	1.6188
p-ABL(C-)(Y245)	p-SAPK/JNK(T183/Y185)	1.5339
p-SAPK/JNK(T183/Y185)	p-ABL(C-)(Y245)	1.5338
p-PTEN(S380)	p-ABL(C-)(Y245)	1.3886
p-FOXO1(S319)/FOXO4(S262)	p-GAB2(S159)	1.2863
p-RAF(C-)(S259)	p-PTEN(S380)	1.2368
p-RAF(C-)(S259)	p-SAPK/JNK(T183/Y185)	1.2025
p-PDK1(S241)	p-ZAP70(Y319)/SYK(Y352)	1.0778
p-SAPK/JNK(T183/Y185)	p-RAF(C-)(S259)	1.0723
p-KIT(C-)(Y719)	p-FOXO1(S319)/FOXO4(S262)	1.0257
