# Supplementary material for: The DIONESUS algorithm provides scalable and accurate reconstruction of dynamic phosphoproteomic networks to reveal new drug targets
Source: Royal Society of Chemistry journal article supplement (doi:10.1039/c5ib00065c), 2015-01-01
Supplement: c5ib00065c6.xlsx [file c5ib00065c6.xlsx]

## Sheet: 130923_PriorKnowledgeList
ABL1	P00519	P00520	Kinase	Cytosol	CRKL	P46109	P47941	NA	NA	binding	7493940	BIND
ABL1	P00519	P00520	Kinase	Cytosol	CRKL	P46109	P47941	NA	NA	binding	7493940	ncbi_hprd
ABL1	P00519	P00520	Kinase	Cytosol	CRKL	P46109	P47941	NA	NA	binding	7926767	ncbi_hprd
ABL1	P00519	P00520	Kinase	Cytosol	CRKL	P46109	P47941	NA	NA	binding	8083188	ncbi_hprd
ABL1	P00519	P00520	Kinase	Cytosol	CRKL	P46109	P47941	NA	NA	binding	8978305	ncbi_hprd
ABL1	P00519	P00520	Kinase	Cytosol	CRKL	P46109	P47941	NA	NA	binding	9820532	ncbi_hprd
ABL1	P00519	P00520	Kinase	Cytosol	CRKL	P46109	P47941	NA	NA	binding	10592173	kegg_mammalian
ABL1	P00519	P00520	Kinase	Cytosol	STAT5A	P42229	P42230	NA	Nucleus	binding	10592173	kegg_mammalian
ABL1	P00519	P00520	Kinase	Cytosol	SHC1	P29353	P98083	NA	Cytosol	phosphorylation	8112292	SAVI
ABL1	P00519	P00520	Kinase	Cytosol	SHC1	P29353	P98083	NA	Cytosol	phosphorylation	10592173	kegg_mammalian
ABL1	P46108	Q64010	NA	Cytosol	CRK	P00519	P00520	Kinase	Cytosol	binding	10592173	kegg_mammalian
ABL1	P23458	P52332	NA	NA	JAK1	P00519	P00520	Kinase	Cytosol	Binding	9774693	ncbi_hprd
ABL1	P23458	P52332	NA	NA	JAK1	P00519	P00520	Kinase	Cytosol	Binding	12130510	BIND
ABL1	P23458	P52332	NA	NA	JAK1	P00519	P00520	Kinase	Cytosol	Binding	12130510	ncbi_hprd
ABL1	P43403	P43404	NA	Cytosol	ZAP70	P00519	P00520	Kinase	Cytosol	Binding	7760813	BIND
ABL1	P43403	P43404	NA	Cytosol	ZAP70	P00519	P00520	Kinase	Cytosol	Binding	7760813	ncbi_hprd
AKT1	P31749	P31750	NA	Cytosol	IRS1	P35568	P35569	Adapter	Cytosol	Binding	10497255	BIND
AKT1	P31749	P31750	NA	Cytosol	IRS1	P35568	P35569	Adapter	Cytosol	Binding	10497255	ncbi_hprd
AKT1	P31749	P31750	NA	Cytosol	GAB2	Q9UQC2	Q9Z1S8	NA	NA	Binding	11782427	BIND
AKT1	P31749	P31750	NA	Cytosol	GAB2	Q9UQC2	Q9Z1S8	NA	NA	Binding	11782427	ncbi_hprd
AKT1	P31749	P31750	NA	Cytosol	RPS6KB1	P23443	Q8BSK8	Kinase	Cytosol	Binding	11438723	MINT
AKT1	P31749	P31750	NA	Cytosol	RPS6KB1	P23443	Q8BSK8	Kinase	Cytosol	Binding	11438723	ncbi_hprd
AKT1	P31749	P31750	NA	Cytosol	FRAP1	P42345	Q9JLN9	Kinase	Cytosol	Binding	11438723	MINT
AKT1	P31749	P31750	NA	Cytosol	FOXO4	NA	NA	NA	NA	Binding	11313479	ncbi_hprd
AKT1	P31749	P31750	NA	Cytosol	FOXO4	NA	NA	NA	NA	Binding	15688030	ncbi_hprd
AKT1	P31749	P31750	NA	Cytosol	RAF1	P04049	Q99N57	NA	Cytosol	Phosphorylation	10576742	BIND
AKT1	P31749	P31750	NA	Cytosol	RAF1	P04049	Q99N57	NA	Cytosol	Phosphorylation	10576742	SAVI
AKT1	P31749	P31750	NA	Cytosol	RAF1	P04049	Q99N57	NA	Cytosol	Phosphorylation	10576742	ncbi_hprd
AKT1	P31749	P31750	NA	Cytosol	RAF1	P04049	Q99N57	NA	Cytosol	Phosphorylation	16189514	BIND
AKT1	P31749	P31750	NA	Cytosol	RAF1	P04049	Q99N57	NA	Cytosol	Phosphorylation	16189514	vidal
AKT1	P31749	P31750	NA	Cytosol	RAF1	P04049	Q99N57	NA	Cytosol	Phosphorylation	16189514	ncbi_hprd
AKT1	P31749	P31750	NA	Cytosol	FOXO1A	Q12778	Q9R1E0	TF	Nucleus	Phosphorylation	10102273	SAVI
AKT1	P31749	P31750	NA	Cytosol	FOXO1A	Q12778	Q9R1E0	TF	Nucleus	Phosphorylation	10358075	SAVI
AKT1	P31749	P31750	NA	Cytosol	GSK3A	P49840	NA	Kinase	Cytosol	Phosphorylation	8524413	SAVI
AKT1	P60484	O08586	NA	Cytosol	PTEN	P31749	P31750	NA	Cytosol	binding	10592173	kegg_mammalian
CREB1	P16220	Q01147	NA	Nucleus	MAPK14	Q16539	P47811	NA	Cytosol	NA	11377386	BIND
CREB1	P16220	Q01147	NA	Nucleus	MAPK14	Q16539	P47811	NA	Cytosol	NA	11377386	ncbi_hprd
CREB1	P16220	Q01147	NA	Nucleus	MAPK14	Q16539	P47811	NA	Cytosol	NA	16189514	BIND
CREB1	P16220	Q01147	NA	Nucleus	MAPK14	Q16539	P47811	NA	Cytosol	NA	16189514	vidal
CREB1	P16220	Q01147	NA	Nucleus	MAPK14	Q16539	P47811	NA	Cytosol	NA	16189514	ncbi_hprd
CRK	P46108	Q64010	NA	Cytosol	CRKL	P46109	P47941	NA	NA	Binding	9614078	BIND
CRK	P46108	Q64010	NA	Cytosol	CRKL	P46109	P47941	NA	NA	Binding	9614078	ncbi_hprd
CRK	P46108	Q64010	NA	Cytosol	MAPK8	P45983	Q91Y86	Kinase	Nucleus	binding	10592173	kegg_mammalian
CRK	P46108	Q64010	NA	Cytosol	MAPK8	P45983	Q91Y86	Kinase	Nucleus	binding	11432831	BIND
CRK	P46108	Q64010	NA	Cytosol	MAPK8	P45983	Q91Y86	Kinase	Nucleus	binding	11432831	ncbi_hprd
CRK	P46108	Q64010	NA	Cytosol	SHC1	P29353	P98083	NA	Cytosol	Binding	8662907	SAVI
CRK	P46108	Q64010	NA	Cytosol	ABL1	P00519	P00520	Kinase	Cytosol	binding	10592173	kegg_mammalian
CRK	P46108	Q64010	NA	Cytosol	PDGFRA	P16234	P26618	NA	NA	NA	9546424	BIND
CRK	P46108	Q64010	NA	Cytosol	PDGFRA	P16234	P26618	NA	NA	NA	9546424	ncbi_hprd
CRK	P46108	Q64010	NA	Cytosol	PDGFRA	P16234	P26618	NA	NA	NA	10733900	BIND
CRK	P46108	Q64010	NA	Cytosol	PDGFRA	P16234	P26618	NA	NA	NA	10733900	ncbi_hprd
CRK	P46108	Q64010	NA	Cytosol	PDGFRA	P16234	P26618	NA	NA	NA	16189514	BIND
CRK	P46108	Q64010	NA	Cytosol	PDGFRA	P16234	P26618	NA	NA	NA	16189514	vidal
CRK	P46108	Q64010	NA	Cytosol	PDGFRA	P16234	P26618	NA	NA	NA	16189514	ncbi_hprd
CRK	P45984	Q9WTU6	NA	NA	MAPK9	P46108	Q64010	NA	Cytosol	binding	10592173	kegg_mammalian
CRK	Q13480	Q9QYY0	Adapter	Cytosol	GAB1	P46108	Q64010	NA	Cytosol	binding	10592173	kegg_mammalian
CRK	Q13480	Q9QYY0	Adapter	Cytosol	GAB1	P46108	Q64010	NA	Cytosol	binding	12138161	BIND
CRK	Q13480	Q9QYY0	Adapter	Cytosol	GAB1	P46108	Q64010	NA	Cytosol	binding	12138161	ncbi_hprd
CRK	Q14289	Q9QVP9	Kinase	Cytosol	PTK2B	P46108	Q64010	NA	Cytosol	Binding	10329689	BIND
CRK	Q14289	Q9QVP9	Kinase	Cytosol	PTK2B	P46108	Q64010	NA	Cytosol	Binding	10329689	ncbi_hprd
CRK	P53779	Q61831	NA	NA	MAPK10	P46108	Q64010	NA	Cytosol	binding	10592173	kegg_mammalian
CRK	P09619	P05622	NA	Membrane	PDGFRB	P46108	Q64010	NA	Cytosol	NA	2173144	ncbi_hprd
CRK	P09619	P05622	NA	Membrane	PDGFRB	P46108	Q64010	NA	Cytosol	NA	10733900	BIND
CRK	P09619	P05622	NA	Membrane	PDGFRB	P46108	Q64010	NA	Cytosol	NA	10733900	ncbi_hprd
CRK	P09619	P05622	NA	Membrane	PDGFRB	P46108	Q64010	NA	Cytosol	NA	16189514	BIND
CRK	P09619	P05622	NA	Membrane	PDGFRB	P46108	Q64010	NA	Cytosol	NA	16189514	vidal
CRK	P09619	P05622	NA	Membrane	PDGFRB	P46108	Q64010	NA	Cytosol	NA	16189514	ncbi_hprd
CRK	P43403	P43404	NA	Cytosol	ZAP70	P46108	Q64010	NA	Cytosol	NA	10419455	BIND
CRK	P43403	P43404	NA	Cytosol	ZAP70	P46108	Q64010	NA	Cytosol	NA	10419455	ncbi_hprd
CRK	P43403	P43404	NA	Cytosol	ZAP70	P46108	Q64010	NA	Cytosol	NA	16189514	BIND
CRK	P43403	P43404	NA	Cytosol	ZAP70	P46108	Q64010	NA	Cytosol	NA	16189514	vidal
CRK	P43403	P43404	NA	Cytosol	ZAP70	P46108	Q64010	NA	Cytosol	NA	16189514	ncbi_hprd
CRKL	P43405	P48025	NA	Cytosol	SYK	P46109	P47941	NA	NA	Binding	11313252	BIND
CRKL	P43405	P48025	NA	Cytosol	SYK	P46109	P47941	NA	NA	Binding	11313252	ncbi_hprd
CRKL	P10721	P05532	Adapter	Cytosol	KIT	P46109	P47941	NA	NA	Binding	9092574	BIND
CRKL	P10721	P05532	Adapter	Cytosol	KIT	P46109	P47941	NA	NA	Binding	9092574	ncbi_hprd
CRKL	P10721	P05532	Adapter	Cytosol	KIT	P46109	P47941	NA	NA	Binding	11071635	ncbi_hprd
CRKL	P45983	Q91Y86	Kinase	Nucleus	MAPK8	P46109	P47941	NA	NA	binding	10592173	kegg_mammalian
CRKL	P45984	Q9WTU6	NA	NA	MAPK9	P46109	P47941	NA	NA	binding	10592173	kegg_mammalian
CRKL	P00519	P00520	Kinase	Cytosol	ABL1	P46109	P47941	NA	NA	binding	7493940	BIND
CRKL	P00519	P00520	Kinase	Cytosol	ABL1	P46109	P47941	NA	NA	binding	7493940	ncbi_hprd
CRKL	P00519	P00520	Kinase	Cytosol	ABL1	P46109	P47941	NA	NA	binding	7926767	ncbi_hprd
CRKL	P00519	P00520	Kinase	Cytosol	ABL1	P46109	P47941	NA	NA	binding	8083188	ncbi_hprd
CRKL	P00519	P00520	Kinase	Cytosol	ABL1	P46109	P47941	NA	NA	binding	8978305	ncbi_hprd
CRKL	P00519	P00520	Kinase	Cytosol	ABL1	P46109	P47941	NA	NA	binding	9820532	ncbi_hprd
CRKL	P00519	P00520	Kinase	Cytosol	ABL1	P46109	P47941	NA	NA	binding	10592173	kegg_mammalian
CRKL	Q06124	P35235	NA	Cytosol	PTPN11	P46109	P47941	NA	NA	Binding	9344843	BIND
CRKL	Q06124	P35235	NA	Cytosol	PTPN11	P46109	P47941	NA	NA	Binding	9344843	ncbi_hprd
CRKL	P46108	Q64010	NA	Cytosol	CRK	P46109	P47941	NA	NA	Binding	9614078	BIND
CRKL	P46108	Q64010	NA	Cytosol	CRK	P46109	P47941	NA	NA	Binding	9614078	ncbi_hprd
CRKL	P29353	P98083	NA	Cytosol	SHC1	P46109	P47941	NA	NA	Binding	9344843	BIND
CRKL	P29353	P98083	NA	Cytosol	SHC1	P46109	P47941	NA	NA	Binding	9344843	ncbi_hprd
CRKL	P42229	P42230	NA	Nucleus	STAT5A	P46109	P47941	NA	NA	Binding	9837784	BIND
CRKL	P42229	P42230	NA	Nucleus	STAT5A	P46109	P47941	NA	NA	Binding	9837784	ncbi_hprd
CRKL	P42229	P42230	NA	Nucleus	STAT5A	P46109	P47941	NA	NA	Binding	11167825	BIND
CRKL	P42229	P42230	NA	Nucleus	STAT5A	P46109	P47941	NA	NA	Binding	11167825	ncbi_hprd
CRKL	Q13480	Q9QYY0	Adapter	Cytosol	GAB1	P46109	P47941	NA	NA	binding	10592173	kegg_mammalian
CRKL	Q13480	Q9QYY0	Adapter	Cytosol	GAB1	P46109	P47941	NA	NA	binding	10753869	BIND
CRKL	Q13480	Q9QYY0	Adapter	Cytosol	GAB1	P46109	P47941	NA	NA	binding	10753869	ncbi_hprd
CRKL	Q9UQC2	Q9Z1S8	NA	NA	GAB2	P46109	P47941	NA	NA	Binding	11334882	BIND
CRKL	Q9UQC2	Q9Z1S8	NA	NA	GAB2	P46109	P47941	NA	NA	Binding	11334882	ncbi_hprd
CRKL	P16234	P26618	NA	NA	PDGFRA	P46109	P47941	NA	NA	Binding	9546424	BIND
CRKL	P16234	P26618	NA	NA	PDGFRA	P46109	P47941	NA	NA	Binding	9546424	ncbi_hprd
CRKL	O00459	O08908	NA	NA	PIK3R2	P46109	P47941	NA	NA	Binding	9092574	BIND
CRKL	O00459	O08908	NA	NA	PIK3R2	P46109	P47941	NA	NA	Binding	9092574	ncbi_hprd
CRKL	P53779	Q61831	NA	NA	MAPK10	P46109	P47941	NA	NA	binding	10592173	kegg_mammalian
EGFR	P00533	Q01279	NA	Membrane	PDGFRB	P09619	P05622	NA	Membrane	Binding	9506992	BIND
EGFR	P00533	Q01279	NA	Membrane	PDGFRB	P09619	P05622	NA	Membrane	Binding	9506992	ncbi_hprd
EGFR	P00533	Q01279	NA	Membrane	GAB1	Q13480	Q9QYY0	Adapter	Cytosol	Binding	11432805	BIND
EGFR	P00533	Q01279	NA	Membrane	GAB1	Q13480	Q9QYY0	Adapter	Cytosol	Binding	11432805	ncbi_hprd
EGFR	P00533	Q01279	NA	Membrane	PTPN11	Q06124	P35235	NA	Cytosol	Binding	7673163	BIND
EGFR	P00533	Q01279	NA	Membrane	PTPN11	Q06124	P35235	NA	Cytosol	Binding	7673163	ncbi_hprd
EGFR	P00533	Q01279	NA	Membrane	PTPN11	Q06124	P35235	NA	Cytosol	Binding	16273093	ncbi_hprd
EGFR	P00533	Q01279	NA	Membrane	PTPN11	Q06124	P35235	NA	Cytosol	Binding	16729043	ncbi_hprd
EGFR	P00533	Q01279	NA	Membrane	SRC	P12931	P05480	NA	Cytosol	binding	10592173	kegg_mammalian
EGFR	P00533	Q01279	NA	Membrane	SRC	P12931	P05480	NA	Cytosol	binding	10971656	BIND
EGFR	P00533	Q01279	NA	Membrane	SRC	P12931	P05480	NA	Cytosol	binding	10971656	ncbi_hprd
EGFR	P00533	Q01279	NA	Membrane	STAT1	P42224	P42225	NA	Nucleus	Binding	12070153	BIND
EGFR	P00533	Q01279	NA	Membrane	STAT1	P42224	P42225	NA	Nucleus	Binding	12070153	ncbi_hprd
EGFR	P00533	Q01279	NA	Membrane	PIK3R2	O00459	O08908	NA	NA	binding	10592173	kegg_mammalian
EGFR	P00533	Q01279	NA	Membrane	PIK3R3	Q92569	Q64143	NA	NA	binding	10592173	kegg_mammalian
EGFR	P00533	Q01279	NA	Membrane	JAK1	P23458	P52332	NA	NA	binding	10592173	kegg_mammalian
EGFR	P00533	Q01279	NA	Membrane	SHC1	P29353	P98083	NA	Cytosol	bindng	1623525	ncbi_hprd
EGFR	P00533	Q01279	NA	Membrane	SHC1	P29353	P98083	NA	Cytosol	bindng	7681824	SAVI
EGFR	P00533	Q01279	NA	Membrane	SHC1	P29353	P98083	NA	Cytosol	bindng	7708014	IntAct
EGFR	P00533	Q01279	NA	Membrane	SHC1	P29353	P98083	NA	Cytosol	bindng	7798194	IntAct
EGFR	P00533	Q01279	NA	Membrane	SHC1	P29353	P98083	NA	Cytosol	bindng	8577769	ncbi_hprd
EGFR	P00533	Q01279	NA	Membrane	SHC1	P29353	P98083	NA	Cytosol	bindng	8610109	ncbi_hprd
EGFR	P00533	Q01279	NA	Membrane	SHC1	P29353	P98083	NA	Cytosol	bindng	8662998	MINT
EGFR	P00533	Q01279	NA	Membrane	SHC1	P29353	P98083	NA	Cytosol	bindng	8808684	SAVI
EGFR	P00533	Q01279	NA	Membrane	SHC1	P29353	P98083	NA	Cytosol	bindng	8887653	IntAct
EGFR	P00533	Q01279	NA	Membrane	SHC1	P29353	P98083	NA	Cytosol	bindng	8887653	ncbi_hprd
EGFR	P00533	Q01279	NA	Membrane	SHC1	P29353	P98083	NA	Cytosol	bindng	8943228	ncbi_hprd
EGFR	P00533	Q01279	NA	Membrane	SHC1	P29353	P98083	NA	Cytosol	bindng	9544989	BIND
EGFR	P00533	Q01279	NA	Membrane	SHC1	P29353	P98083	NA	Cytosol	bindng	9544989	ncbi_hprd
EGFR	P00533	Q01279	NA	Membrane	SHC1	P29353	P98083	NA	Cytosol	bindng	10592173	kegg_mammalian
EGFR	P00533	Q01279	NA	Membrane	SHC1	P29353	P98083	NA	Cytosol	bindng	12577067	BIND
EGFR	P00533	Q01279	NA	Membrane	SHC1	P29353	P98083	NA	Cytosol	bindng	16273093	ncbi_hprd
EGFR	P00533	Q01279	NA	Membrane	SHC1	P29353	P98083	NA	Cytosol	bindng	16729043	ncbi_hprd
EGFR	P00533	Q01279	NA	Membrane	ERBB2	P04626	P70424	Receptor	Membrane	bindng	7683250	IntAct
EGFR	P00533	Q01279	NA	Membrane	ERBB2	P04626	P70424	Receptor	Membrane	bindng	7708014	IntAct
EGFR	P00533	Q01279	NA	Membrane	ERBB2	P04626	P70424	Receptor	Membrane	bindng	10572067	IntAct
EGFR	P00533	Q01279	NA	Membrane	ERBB2	P04626	P70424	Receptor	Membrane	bindng	10592173	kegg_mammalian
EGFR	P00533	Q01279	NA	Membrane	ERBB2	P04626	P70424	Receptor	Membrane	bindng	11500850	BIND
EGFR	P00533	Q01279	NA	Membrane	ERBB2	P04626	P70424	Receptor	Membrane	bindng	11500850	ncbi_hprd
EGFR	P00533	Q01279	NA	Membrane	ERBB2	P04626	P70424	Receptor	Membrane	bindng	15652750	ncbi_hprd
EGFR	P00533	Q01279	NA	Membrane	ERBB2	P04626	P70424	Receptor	Membrane	bindng	16516204	ncbi_hprd
EGFR	P00533	Q01279	NA	Membrane	ERBB4	Q15303	Q61527	Adapter	Cytosol	bindng	7683250	IntAct
EGFR	P00533	Q01279	NA	Membrane	ERBB4	Q15303	Q61527	Adapter	Cytosol	bindng	7708014	IntAct
EGFR	P00533	Q01279	NA	Membrane	ERBB4	Q15303	Q61527	Adapter	Cytosol	bindng	9569041	IntAct
EGFR	P00533	Q01279	NA	Membrane	ERBB4	Q15303	Q61527	Adapter	Cytosol	bindng	10572067	IntAct
EGFR	P00533	Q01279	NA	Membrane	STAT5A	P42229	P42230	NA	Nucleus	phosphorylation	10358079	BIND
EGFR	P00533	Q01279	NA	Membrane	STAT5A	P42229	P42230	NA	Nucleus	phosphorylation	10358079	ncbi_hprd
EGFR	P00533	Q01279	NA	Membrane	STAT5A	P42229	P42230	NA	Nucleus	phosphorylation	10592173	kegg_mammalian
EGFR	P00533	Q01279	NA	Membrane	STAT5A	P42229	P42230	NA	Nucleus	phosphorylation	16729043	ncbi_hprd
EGFR	P00533	Q01279	NA	Membrane	CRK	P46108	Q64010	NA	Cytosol	phosphorylation	8662907	SAVI
EGFR	P00533	Q01279	NA	Membrane	CRK	P46108	Q64010	NA	Cytosol	phosphorylation	9642287	BIND
EGFR	P00533	Q01279	NA	Membrane	CRK	P46108	Q64010	NA	Cytosol	phosphorylation	9642287	ncbi_hprd
EGFR	P00533	Q01279	NA	Membrane	CRK	P46108	Q64010	NA	Cytosol	phosphorylation	10592173	kegg_mammalian
EGFR	P00533	Q01279	NA	Membrane	CRK	P46108	Q64010	NA	Cytosol	phosphorylation	16729043	ncbi_hprd
EGFR	P00533	Q01279	NA	Membrane	PTK2B	Q14289	Q9QVP9	Kinase	Cytosol	Phosphorylation	10777553	BIND
EGFR	P00533	Q01279	NA	Membrane	PTK2B	Q14289	Q9QVP9	Kinase	Cytosol	Phosphorylation	10777553	ncbi_hprd
EGFR	P00533	Q01279	NA	Membrane	PTK2B	Q14289	Q9QVP9	Kinase	Cytosol	Phosphorylation	11274221	SAVI
EGFR	P00533	Q01279	NA	Membrane	PLCG2	P16885	NA	NA	NA	phosphorylation	10592173	kegg_mammalian
EGFR	P00533	Q01279	NA	Membrane	CRKL	P46109	P47941	NA	NA	phosphorylation	10592173	kegg_mammalian
ERBB2	P04626	P70424	Receptor	Membrane	PIK3R2	O00459	O08908	NA	NA	binding	1334406	BIND
ERBB2	P04626	P70424	Receptor	Membrane	PIK3R2	O00459	O08908	NA	NA	binding	1334406	ncbi_hprd
ERBB2	P04626	P70424	Receptor	Membrane	PIK3R2	O00459	O08908	NA	NA	binding	10592173	kegg_mammalian
ERBB2	P04626	P70424	Receptor	Membrane	PIK3R2	O00459	O08908	NA	NA	binding	16273093	ncbi_hprd
ERBB2	P04626	P70424	Receptor	Membrane	SHC1	P29353	P98083	NA	Cytosol	binding	8026468	SAVI
ERBB2	P04626	P70424	Receptor	Membrane	SHC1	P29353	P98083	NA	Cytosol	binding	9710588	BIND
ERBB2	P04626	P70424	Receptor	Membrane	SHC1	P29353	P98083	NA	Cytosol	binding	9710588	ncbi_hprd
ERBB2	P04626	P70424	Receptor	Membrane	SHC1	P29353	P98083	NA	Cytosol	binding	10085134	ncbi_hprd
ERBB2	P04626	P70424	Receptor	Membrane	SHC1	P29353	P98083	NA	Cytosol	binding	10592173	kegg_mammalian
ERBB2	P04626	P70424	Receptor	Membrane	SHC1	P29353	P98083	NA	Cytosol	binding	16273093	ncbi_hprd
ERBB2	P04626	P70424	Receptor	Membrane	SHC1	P29353	P98083	NA	Cytosol	binding	16729043	ncbi_hprd
ERBB2	P04626	P70424	Receptor	Membrane	SRC	P12931	P05480	NA	Cytosol	Binding	7542762	BIND
ERBB2	P04626	P70424	Receptor	Membrane	SRC	P12931	P05480	NA	Cytosol	Binding	7542762	ncbi_hprd
ERBB2	P04626	P70424	Receptor	Membrane	SRC	P12931	P05480	NA	Cytosol	Binding	15788656	ncbi_hprd
ERBB2	P04626	P70424	Receptor	Membrane	PLCG2	P16885	NA	NA	NA	binding	10592173	kegg_mammalian
ERBB2	P04626	P70424	Receptor	Membrane	PIK3R3	Q92569	Q64143	NA	NA	binding	10592173	kegg_mammalian
ERBB2	P04626	P70424	Receptor	Membrane	JAK1	P23458	P52332	NA	NA	binding	10592173	kegg_mammalian
ERBB2	P04626	P70424	Receptor	Membrane	ERBB4	Q15303	Q61527	Adapter	Cytosol	bindng	7683250	IntAct
ERBB2	P04626	P70424	Receptor	Membrane	ERBB4	Q15303	Q61527	Adapter	Cytosol	bindng	7708014	IntAct
ERBB2	P04626	P70424	Receptor	Membrane	ERBB4	Q15303	Q61527	Adapter	Cytosol	bindng	10572067	IntAct
ERBB2	Q14289	Q9QVP9	Kinase	Cytosol	PTK2B	P04626	P70424	Receptor	Membrane	Binding	10713673	BIND
ERBB2	Q14289	Q9QVP9	Kinase	Cytosol	PTK2B	P04626	P70424	Receptor	Membrane	Binding	10713673	ncbi_hprd
ERBB2	P19174	Q62077	Phospholipase	Cytosol	PLCG1	P04626	P70424	Receptor	Membrane	binding	1676673	BIND
ERBB2	P19174	Q62077	Phospholipase	Cytosol	PLCG1	P04626	P70424	Receptor	Membrane	binding	1676673	ncbi_hprd
ERBB2	P19174	Q62077	Phospholipase	Cytosol	PLCG1	P04626	P70424	Receptor	Membrane	binding	1683701	BIND
ERBB2	P19174	Q62077	Phospholipase	Cytosol	PLCG1	P04626	P70424	Receptor	Membrane	binding	1683701	ncbi_hprd
ERBB2	P19174	Q62077	Phospholipase	Cytosol	PLCG1	P04626	P70424	Receptor	Membrane	binding	10592173	kegg_mammalian
ERBB2	P19174	Q62077	Phospholipase	Cytosol	PLCG1	P04626	P70424	Receptor	Membrane	binding	16273093	ncbi_hprd
ERBB2	P00533	Q01279	NA	Membrane	EGFR	P04626	P70424	Receptor	Membrane	bindng	7683250	IntAct
ERBB2	P00533	Q01279	NA	Membrane	EGFR	P04626	P70424	Receptor	Membrane	bindng	7708014	IntAct
ERBB2	P00533	Q01279	NA	Membrane	EGFR	P04626	P70424	Receptor	Membrane	bindng	10572067	IntAct
ERBB2	P00533	Q01279	NA	Membrane	EGFR	P04626	P70424	Receptor	Membrane	bindng	10592173	kegg_mammalian
ERBB2	P00533	Q01279	NA	Membrane	EGFR	P04626	P70424	Receptor	Membrane	bindng	11500850	BIND
ERBB2	P00533	Q01279	NA	Membrane	EGFR	P04626	P70424	Receptor	Membrane	bindng	11500850	ncbi_hprd
ERBB2	P00533	Q01279	NA	Membrane	EGFR	P04626	P70424	Receptor	Membrane	bindng	15652750	ncbi_hprd
ERBB2	P00533	Q01279	NA	Membrane	EGFR	P04626	P70424	Receptor	Membrane	bindng	16516204	ncbi_hprd
ERBB4	Q15303	Q61527	Adapter	Cytosol	PLCG1	P19174	Q62077	Phospholipase	Cytosol	binding	10592173	kegg_mammalian
ERBB4	Q15303	Q61527	Adapter	Cytosol	PLCG2	P16885	NA	NA	NA	binding	10592173	kegg_mammalian
ERBB4	Q15303	Q61527	Adapter	Cytosol	STAT5A	P42229	P42230	NA	Nucleus	phosphorylation	10592173	kegg_mammalian
ERBB4	Q15303	Q61527	Adapter	Cytosol	STAT5A	P42229	P42230	NA	Nucleus	phosphorylation	15534001	BIND
ERBB4	P00533	Q01279	NA	Membrane	EGFR	Q15303	Q61527	Adapter	Cytosol	bindng	7683250	IntAct
ERBB4	P00533	Q01279	NA	Membrane	EGFR	Q15303	Q61527	Adapter	Cytosol	bindng	7708014	IntAct
ERBB4	P00533	Q01279	NA	Membrane	EGFR	Q15303	Q61527	Adapter	Cytosol	bindng	9569041	IntAct
ERBB4	P00533	Q01279	NA	Membrane	EGFR	Q15303	Q61527	Adapter	Cytosol	bindng	10572067	IntAct
ERBB4	P04626	P70424	Receptor	Membrane	ERBB2	Q15303	Q61527	Adapter	Cytosol	bindng	7683250	IntAct
ERBB4	P04626	P70424	Receptor	Membrane	ERBB2	Q15303	Q61527	Adapter	Cytosol	bindng	7708014	IntAct
ERBB4	P04626	P70424	Receptor	Membrane	ERBB2	Q15303	Q61527	Adapter	Cytosol	bindng	10572067	IntAct
FGFR1	P11362	P16092	NA	NA	PIK3R2	O00459	O08908	NA	NA	binding	10592173	kegg_mammalian
FGFR1	P11362	P16092	NA	NA	PIK3R3	Q92569	Q64143	NA	NA	binding	10592173	kegg_mammalian
FGFR1	P11362	P16092	NA	NA	SHC1	P29353	P98083	NA	Cytosol	NA	7514169	BIND
FGFR1	P11362	P16092	NA	NA	SHC1	P29353	P98083	NA	Cytosol	NA	7514169	ncbi_hprd
FGFR1	P11362	P16092	NA	NA	SHC1	P29353	P98083	NA	Cytosol	NA	16189514	BIND
FGFR1	P11362	P16092	NA	NA	SHC1	P29353	P98083	NA	Cytosol	NA	16189514	vidal
FGFR1	P11362	P16092	NA	NA	SHC1	P29353	P98083	NA	Cytosol	NA	16189514	ncbi_hprd
FOXO1A	Q12778	Q9R1E0	TF	Nucleus	SRC	P12931	P05480	NA	Cytosol	Binding	10973497	BIND
FOXO4	P31749	P31750	NA	Cytosol	AKT1	NA	NA	NA	NA	Binding	11313479	ncbi_hprd
FOXO4	P31749	P31750	NA	Cytosol	AKT1	NA	NA	NA	NA	Binding	15688030	ncbi_hprd
FRAP1	P42345	Q9JLN9	Kinase	Cytosol	RPS6KA1	Q15418	P18653	NA	Cytosol	Binding	11914378	MINT
FRAP1	P42345	Q9JLN9	Kinase	Cytosol	RPS6KB1	P23443	Q8BSK8	Kinase	Cytosol	Phosphorylation	11500364	SAVI
FRAP1	P42345	Q9JLN9	Kinase	Cytosol	RPS6KB1	P23443	Q8BSK8	Kinase	Cytosol	Phosphorylation	12820960	SAVI
FRAP1	P42345	Q9JLN9	Kinase	Cytosol	RPS6KB1	P23443	Q8BSK8	Kinase	Cytosol	Phosphorylation	12842888	SAVI
FRAP1	P31749	P31750	NA	Cytosol	AKT1	P42345	Q9JLN9	Kinase	Cytosol	Binding	11438723	MINT
FRAP1	O15530	Q9Z2A0	NA	Cytosol	PDPK1	P42345	Q9JLN9	Kinase	Cytosol	Binding	11438723	MINT
GAB1	Q13480	Q9QYY0	Adapter	Cytosol	CRK	P46108	Q64010	NA	Cytosol	binding	10592173	kegg_mammalian
GAB1	Q13480	Q9QYY0	Adapter	Cytosol	CRK	P46108	Q64010	NA	Cytosol	binding	12138161	BIND
GAB1	Q13480	Q9QYY0	Adapter	Cytosol	CRK	P46108	Q64010	NA	Cytosol	binding	12138161	ncbi_hprd
GAB1	Q13480	Q9QYY0	Adapter	Cytosol	CRKL	P46109	P47941	NA	NA	binding	10592173	kegg_mammalian
GAB1	Q13480	Q9QYY0	Adapter	Cytosol	CRKL	P46109	P47941	NA	NA	binding	10753869	BIND
GAB1	Q13480	Q9QYY0	Adapter	Cytosol	CRKL	P46109	P47941	NA	NA	binding	10753869	ncbi_hprd
GAB1	Q13480	Q9QYY0	Adapter	Cytosol	PLCG2	P16885	NA	NA	NA	Binding	11507676	BIND
GAB1	Q13480	Q9QYY0	Adapter	Cytosol	PLCG2	P16885	NA	NA	NA	Binding	11507676	ncbi_hprd
GAB1	Q13480	Q9QYY0	Adapter	Cytosol	PIK3R2	O00459	O08908	NA	NA	binding	10592173	kegg_mammalian
GAB1	Q13480	Q9QYY0	Adapter	Cytosol	PIK3R3	Q92569	Q64143	NA	NA	binding	10592173	kegg_mammalian
GAB1	Q13480	Q9QYY0	Adapter	Cytosol	PTPN11	Q06124	P35235	NA	Cytosol	bindng	7708014	IntAct
GAB1	Q13480	Q9QYY0	Adapter	Cytosol	PTPN11	Q06124	P35235	NA	Cytosol	bindng	7940758	IntAct
GAB1	Q13480	Q9QYY0	Adapter	Cytosol	PTPN11	Q06124	P35235	NA	Cytosol	bindng	9658397	IntAct
GAB1	Q13480	Q9QYY0	Adapter	Cytosol	PTPN11	Q06124	P35235	NA	Cytosol	bindng	10592173	kegg_mammalian
GAB1	Q13480	Q9QYY0	Adapter	Cytosol	PTPN11	Q06124	P35235	NA	Cytosol	bindng	10967325	IntAct
GAB1	Q13480	Q9QYY0	Adapter	Cytosol	PTPN11	Q06124	P35235	NA	Cytosol	bindng	11125103	IntAct
GAB1	Q13480	Q9QYY0	Adapter	Cytosol	PTPN11	Q06124	P35235	NA	Cytosol	bindng	11940581	BIND
GAB1	Q13480	Q9QYY0	Adapter	Cytosol	PTPN11	Q06124	P35235	NA	Cytosol	bindng	11940581	ncbi_hprd
GAB1	Q13480	Q9QYY0	Adapter	Cytosol	PTPN11	Q06124	P35235	NA	Cytosol	bindng	12582165	ncbi_hprd
GAB1	Q13480	Q9QYY0	Adapter	Cytosol	PTPN11	Q06124	P35235	NA	Cytosol	bindng	12634794	IntAct
GAB1	Q13480	Q9QYY0	Adapter	Cytosol	PTPN11	Q06124	P35235	NA	Cytosol	bindng	14665621	ncbi_hprd
GAB1	Q13480	Q9QYY0	Adapter	Cytosol	PTPN11	Q06124	P35235	NA	Cytosol	bindng	14701753	SAVI
GAB1	Q13480	Q9QYY0	Adapter	Cytosol	PTPN11	Q06124	P35235	NA	Cytosol	bindng	14701753	ncbi_hprd
GAB1	Q13480	Q9QYY0	Adapter	Cytosol	MET	P08581	P16056	NA	NA	phosphorylation	10592173	kegg_mammalian
GAB1	Q13480	Q9QYY0	Adapter	Cytosol	MET	P08581	P16056	NA	NA	phosphorylation	10995442	BIND
GAB1	Q13480	Q9QYY0	Adapter	Cytosol	MET	P08581	P16056	NA	NA	phosphorylation	10995442	ncbi_hprd
GAB1	Q13480	Q9QYY0	Adapter	Cytosol	MET	P08581	P16056	NA	NA	phosphorylation	11894096	ncbi_hprd
GAB1	P00533	Q01279	NA	Membrane	EGFR	Q13480	Q9QYY0	Adapter	Cytosol	Binding	11432805	BIND
GAB1	P00533	Q01279	NA	Membrane	EGFR	Q13480	Q9QYY0	Adapter	Cytosol	Binding	11432805	ncbi_hprd
GAB1	P19174	Q62077	Phospholipase	Cytosol	PLCG1	Q13480	Q9QYY0	Adapter	Cytosol	Binding	8596638	BIND
GAB1	P19174	Q62077	Phospholipase	Cytosol	PLCG1	Q13480	Q9QYY0	Adapter	Cytosol	Binding	8596638	ncbi_hprd
GAB1	P19174	Q62077	Phospholipase	Cytosol	PLCG1	Q13480	Q9QYY0	Adapter	Cytosol	Binding	11507676	ncbi_hprd
GAB2	Q9UQC2	Q9Z1S8	NA	NA	CRKL	P46109	P47941	NA	NA	Binding	11334882	BIND
GAB2	Q9UQC2	Q9Z1S8	NA	NA	CRKL	P46109	P47941	NA	NA	Binding	11334882	ncbi_hprd
GAB2	Q9UQC2	Q9Z1S8	NA	NA	PLCG2	P16885	NA	NA	NA	Binding	12135708	BIND
GAB2	Q9UQC2	Q9Z1S8	NA	NA	PLCG2	P16885	NA	NA	NA	Binding	12135708	ncbi_hprd
GAB2	Q9UQC2	Q9Z1S8	NA	NA	SRC	P12931	P05480	NA	Cytosol	Binding	10391903	BIND
GAB2	Q9UQC2	Q9Z1S8	NA	NA	SRC	P12931	P05480	NA	Cytosol	Binding	10391903	ncbi_hprd
GAB2	Q9UQC2	Q9Z1S8	NA	NA	PIK3R2	O00459	O08908	NA	NA	binding	10592173	kegg_mammalian
GAB2	Q9UQC2	Q9Z1S8	NA	NA	PIK3R3	Q92569	Q64143	NA	NA	binding	10592173	kegg_mammalian
GAB2	P43405	P48025	NA	Cytosol	SYK	Q9UQC2	Q9Z1S8	NA	NA	binding	10592173	kegg_mammalian
GAB2	P27361	Q63844	NA	NA	MAPK3	Q9UQC2	Q9Z1S8	NA	NA	Binding	15356145	MINT
GAB2	P31749	P31750	NA	Cytosol	AKT1	Q9UQC2	Q9Z1S8	NA	NA	Binding	11782427	BIND
GAB2	P31749	P31750	NA	Cytosol	AKT1	Q9UQC2	Q9Z1S8	NA	NA	Binding	11782427	ncbi_hprd
GAB2	Q06124	P35235	NA	Cytosol	PTPN11	Q9UQC2	Q9Z1S8	NA	NA	binding	10068651	BIND
GAB2	Q06124	P35235	NA	Cytosol	PTPN11	Q9UQC2	Q9Z1S8	NA	NA	binding	10068651	ncbi_hprd
GAB2	Q06124	P35235	NA	Cytosol	PTPN11	Q9UQC2	Q9Z1S8	NA	NA	binding	10592173	kegg_mammalian
GAB2	Q06124	P35235	NA	Cytosol	PTPN11	Q9UQC2	Q9Z1S8	NA	NA	binding	11287610	BIND
GAB2	Q06124	P35235	NA	Cytosol	PTPN11	Q9UQC2	Q9Z1S8	NA	NA	binding	11287610	ncbi_hprd
GAB2	P29353	P98083	NA	Cytosol	SHC1	Q9UQC2	Q9Z1S8	NA	NA	Binding	10704825	MINT
GAB2	P43403	P43404	NA	Cytosol	ZAP70	Q9UQC2	Q9Z1S8	NA	NA	Binding	11572860	BIND
GAB2	P43403	P43404	NA	Cytosol	ZAP70	Q9UQC2	Q9Z1S8	NA	NA	Binding	11572860	ncbi_hprd
GSK3A	P49840	NA	Kinase	Cytosol	CREB1	P16220	Q01147	NA	Nucleus	Phosphorylation	7798217	SAVI
IGF1R	P08069	Q60751	Receptor	Cytosol	PIK3R2	O00459	O08908	NA	NA	binding	10592173	kegg_mammalian
IGF1R	P08069	Q60751	Receptor	Cytosol	PLCG1	P19174	Q62077	Phospholipase	Cytosol	binding	10592173	kegg_mammalian
IGF1R	P08069	Q60751	Receptor	Cytosol	PLCG2	P16885	NA	NA	NA	binding	10592173	kegg_mammalian
IGF1R	P08069	Q60751	Receptor	Cytosol	IRS1	P35568	P35569	Adapter	Cytosol	bindng	7541045	ncbi_hprd
IGF1R	P08069	Q60751	Receptor	Cytosol	IRS1	P35568	P35569	Adapter	Cytosol	bindng	7559507	BIND
IGF1R	P08069	Q60751	Receptor	Cytosol	IRS1	P35568	P35569	Adapter	Cytosol	bindng	7559507	DIP
IGF1R	P08069	Q60751	Receptor	Cytosol	IRS1	P35568	P35569	Adapter	Cytosol	bindng	7559507	ncbi_hprd
IGF1R	P08069	Q60751	Receptor	Cytosol	IRS1	P35568	P35569	Adapter	Cytosol	bindng	7940758	IntAct
IGF1R	P08069	Q60751	Receptor	Cytosol	IRS1	P35568	P35569	Adapter	Cytosol	bindng	8776723	SAVI
IGF1R	P08069	Q60751	Receptor	Cytosol	IRS1	P35568	P35569	Adapter	Cytosol	bindng	10026153	ncbi_hprd
IGF1R	P08069	Q60751	Receptor	Cytosol	IRS1	P35568	P35569	Adapter	Cytosol	bindng	10967325	IntAct
IGF1R	P08069	Q60751	Receptor	Cytosol	IRS1	P35568	P35569	Adapter	Cytosol	bindng	12634794	IntAct
IGF1R	P08069	Q60751	Receptor	Cytosol	IRS1	P35568	P35569	Adapter	Cytosol	bindng	15629149	IntAct
IGF1R	Q06124	P35235	NA	Cytosol	PTPN11	P08069	Q60751	Receptor	Cytosol	Binding	7642582	BIND
IGF1R	Q06124	P35235	NA	Cytosol	PTPN11	P08069	Q60751	Receptor	Cytosol	Binding	7642582	ncbi_hprd
IGF1R	Q06124	P35235	NA	Cytosol	PTPN11	P08069	Q60751	Receptor	Cytosol	Binding	8895367	DIP
IGF1R	P23458	P52332	NA	NA	JAK1	P08069	Q60751	Receptor	Cytosol	Binding	9492017	BIND
IGF1R	P23458	P52332	NA	NA	JAK1	P08069	Q60751	Receptor	Cytosol	Binding	9492017	ncbi_hprd
IGF1R	Q92569	Q64143	NA	NA	PIK3R3	P08069	Q60751	Receptor	Cytosol	binding	9415396	BIND
IGF1R	Q92569	Q64143	NA	NA	PIK3R3	P08069	Q60751	Receptor	Cytosol	binding	9415396	ncbi_hprd
IGF1R	Q92569	Q64143	NA	NA	PIK3R3	P08069	Q60751	Receptor	Cytosol	binding	9524259	BIND
IGF1R	Q92569	Q64143	NA	NA	PIK3R3	P08069	Q60751	Receptor	Cytosol	binding	9524259	ncbi_hprd
IGF1R	Q92569	Q64143	NA	NA	PIK3R3	P08069	Q60751	Receptor	Cytosol	binding	10592173	kegg_mammalian
IGF1R	P29353	P98083	NA	Cytosol	SHC1	P08069	Q60751	Receptor	Cytosol	bindng	7541045	ncbi_hprd
IGF1R	P29353	P98083	NA	Cytosol	SHC1	P08069	Q60751	Receptor	Cytosol	bindng	7940758	IntAct
IGF1R	P29353	P98083	NA	Cytosol	SHC1	P08069	Q60751	Receptor	Cytosol	bindng	8776723	BIND
IGF1R	P29353	P98083	NA	Cytosol	SHC1	P08069	Q60751	Receptor	Cytosol	bindng	8776723	SAVI
IGF1R	P29353	P98083	NA	Cytosol	SHC1	P08069	Q60751	Receptor	Cytosol	bindng	8776723	ncbi_hprd
IGF1R	P29353	P98083	NA	Cytosol	SHC1	P08069	Q60751	Receptor	Cytosol	bindng	10592173	kegg_mammalian
IGF1R	P29353	P98083	NA	Cytosol	SHC1	P08069	Q60751	Receptor	Cytosol	bindng	10967325	IntAct
IGF1R	P29353	P98083	NA	Cytosol	SHC1	P08069	Q60751	Receptor	Cytosol	bindng	12634794	IntAct
IGF1R	P29353	P98083	NA	Cytosol	SHC1	P08069	Q60751	Receptor	Cytosol	bindng	15629149	IntAct
IRS1	P31749	P31750	NA	Cytosol	AKT1	P35568	P35569	Adapter	Cytosol	Binding	10497255	BIND
IRS1	P31749	P31750	NA	Cytosol	AKT1	P35568	P35569	Adapter	Cytosol	Binding	10497255	ncbi_hprd
IRS1	Q06124	P35235	NA	Cytosol	PTPN11	P35568	P35569	Adapter	Cytosol	Binding	8505282	BIND
IRS1	Q06124	P35235	NA	Cytosol	PTPN11	P35568	P35569	Adapter	Cytosol	Binding	8505282	ncbi_hprd
IRS1	Q06124	P35235	NA	Cytosol	PTPN11	P35568	P35569	Adapter	Cytosol	Binding	9756938	BIND
IRS1	Q06124	P35235	NA	Cytosol	PTPN11	P35568	P35569	Adapter	Cytosol	Binding	9756938	ncbi_hprd
IRS1	P29353	P98083	NA	Cytosol	SHC1	P35568	P35569	Adapter	Cytosol	Binding	7499194	BIND
IRS1	P29353	P98083	NA	Cytosol	SHC1	P35568	P35569	Adapter	Cytosol	Binding	7499194	ncbi_hprd
IRS1	P29353	P98083	NA	Cytosol	SHC1	P35568	P35569	Adapter	Cytosol	Binding	9202037	ncbi_hprd
IRS1	P08069	Q60751	Receptor	Cytosol	IGF1R	P35568	P35569	Adapter	Cytosol	bindng	7541045	ncbi_hprd
IRS1	P08069	Q60751	Receptor	Cytosol	IGF1R	P35568	P35569	Adapter	Cytosol	bindng	7559507	BIND
IRS1	P08069	Q60751	Receptor	Cytosol	IGF1R	P35568	P35569	Adapter	Cytosol	bindng	7559507	DIP
IRS1	P08069	Q60751	Receptor	Cytosol	IGF1R	P35568	P35569	Adapter	Cytosol	bindng	7559507	ncbi_hprd
IRS1	P08069	Q60751	Receptor	Cytosol	IGF1R	P35568	P35569	Adapter	Cytosol	bindng	7940758	IntAct
IRS1	P08069	Q60751	Receptor	Cytosol	IGF1R	P35568	P35569	Adapter	Cytosol	bindng	8776723	SAVI
IRS1	P08069	Q60751	Receptor	Cytosol	IGF1R	P35568	P35569	Adapter	Cytosol	bindng	10026153	ncbi_hprd
IRS1	P08069	Q60751	Receptor	Cytosol	IGF1R	P35568	P35569	Adapter	Cytosol	bindng	10967325	IntAct
IRS1	P08069	Q60751	Receptor	Cytosol	IGF1R	P35568	P35569	Adapter	Cytosol	bindng	12634794	IntAct
IRS1	P08069	Q60751	Receptor	Cytosol	IGF1R	P35568	P35569	Adapter	Cytosol	bindng	15629149	IntAct
IRS1	O00459	O08908	NA	NA	PIK3R2	P35568	P35569	Adapter	Cytosol	compound	10592173	kegg_mammalian
IRS1	O00459	O08908	NA	NA	PIK3R2	P35568	P35569	Adapter	Cytosol	compound	11120660	BIND
IRS1	O00459	O08908	NA	NA	PIK3R2	P35568	P35569	Adapter	Cytosol	compound	11120660	ncbi_hprd
IRS1	O00459	O08908	NA	NA	PIK3R2	P35568	P35569	Adapter	Cytosol	compound	11172806	ncbi_hprd
IRS1	Q92569	Q64143	NA	NA	PIK3R3	P35568	P35569	Adapter	Cytosol	compound	7542745	BIND
IRS1	Q92569	Q64143	NA	NA	PIK3R3	P35568	P35569	Adapter	Cytosol	compound	7542745	ncbi_hprd
IRS1	Q92569	Q64143	NA	NA	PIK3R3	P35568	P35569	Adapter	Cytosol	compound	9415396	BIND
IRS1	Q92569	Q64143	NA	NA	PIK3R3	P35568	P35569	Adapter	Cytosol	compound	9415396	ncbi_hprd
IRS1	Q92569	Q64143	NA	NA	PIK3R3	P35568	P35569	Adapter	Cytosol	compound	10417350	BIND
IRS1	Q92569	Q64143	NA	NA	PIK3R3	P35568	P35569	Adapter	Cytosol	compound	10417350	ncbi_hprd
IRS1	Q92569	Q64143	NA	NA	PIK3R3	P35568	P35569	Adapter	Cytosol	compound	10592173	kegg_mammalian
JAK1	P23458	P52332	NA	NA	PTK2B	Q14289	Q9QVP9	Kinase	Cytosol	Binding	10702271	BIND
JAK1	P23458	P52332	NA	NA	PTK2B	Q14289	Q9QVP9	Kinase	Cytosol	Binding	10702271	ncbi_hprd
JAK1	P23458	P52332	NA	NA	IGF1R	P08069	Q60751	Receptor	Cytosol	Binding	9492017	BIND
JAK1	P23458	P52332	NA	NA	IGF1R	P08069	Q60751	Receptor	Cytosol	Binding	9492017	ncbi_hprd
JAK1	P23458	P52332	NA	NA	ABL1	P00519	P00520	Kinase	Cytosol	Binding	9774693	ncbi_hprd
JAK1	P23458	P52332	NA	NA	ABL1	P00519	P00520	Kinase	Cytosol	Binding	12130510	BIND
JAK1	P23458	P52332	NA	NA	ABL1	P00519	P00520	Kinase	Cytosol	Binding	12130510	ncbi_hprd
JAK1	P23458	P52332	NA	NA	RAF1	P04049	Q99N57	NA	Cytosol	Binding	9446616	BIND
JAK1	P23458	P52332	NA	NA	RAF1	P04049	Q99N57	NA	Cytosol	Binding	9446616	ncbi_hprd
JAK1	P23458	P52332	NA	NA	PTPN11	Q06124	P35235	NA	Cytosol	phosphorylation	8995399	BIND
JAK1	P23458	P52332	NA	NA	PTPN11	Q06124	P35235	NA	Cytosol	phosphorylation	8995399	ncbi_hprd
JAK1	P23458	P52332	NA	NA	PTPN11	Q06124	P35235	NA	Cytosol	phosphorylation	10592173	kegg_mammalian
JAK1	P23458	P52332	NA	NA	PTPN11	Q06124	P35235	NA	Cytosol	phosphorylation	11036942	BIND
JAK1	P23458	P52332	NA	NA	PTPN11	Q06124	P35235	NA	Cytosol	phosphorylation	11036942	ncbi_hprd
JAK1	P23458	P52332	NA	NA	PTPN11	Q06124	P35235	NA	Cytosol	phosphorylation	12403768	BIND
JAK1	P23458	P52332	NA	NA	PTPN11	Q06124	P35235	NA	Cytosol	phosphorylation	12403768	ncbi_hprd
JAK1	P23458	P52332	NA	NA	STAT3	P40763	P42227	NA	NA	phosphorylation	10592173	kegg_mammalian
JAK1	P23458	P52332	NA	NA	STAT3	P40763	P42227	NA	NA	phosphorylation	11464862	MINT
JAK1	P23458	P52332	NA	NA	STAT3	P40763	P42227	NA	NA	phosphorylation	11722592	BIND
JAK1	P23458	P52332	NA	NA	STAT3	P40763	P42227	NA	NA	phosphorylation	11722592	ncbi_hprd
JAK1	P23458	P52332	NA	NA	STAT3	P40763	P42227	NA	NA	phosphorylation	11751884	ncbi_hprd
JAK1	P23458	P52332	NA	NA	STAT1	P42224	P42225	NA	Nucleus	phosphorylation	10592173	kegg_mammalian
JAK1	P23458	P52332	NA	NA	STAT1	P42224	P42225	NA	Nucleus	phosphorylation	11722592	BIND
JAK1	P23458	P52332	NA	NA	STAT1	P42224	P42225	NA	Nucleus	phosphorylation	11722592	ncbi_hprd
JAK1	P23458	P52332	NA	NA	STAT5A	P42229	P42230	NA	Nucleus	phosphorylation	10592173	kegg_mammalian
JAK1	P23458	P52332	NA	NA	STAT5A	P42229	P42230	NA	Nucleus	phosphorylation	11722592	BIND
JAK1	P23458	P52332	NA	NA	STAT5A	P42229	P42230	NA	Nucleus	phosphorylation	11722592	ncbi_hprd
JAK1	P23458	P52332	NA	NA	STAT6	P42226	P52633	NA	NA	phosphorylation	10592173	kegg_mammalian
JAK1	P23458	P52332	NA	NA	PIK3R2	O00459	O08908	NA	NA	phosphorylation	10592173	kegg_mammalian
JAK1	P23458	P52332	NA	NA	PIK3R3	Q92569	Q64143	NA	NA	phosphorylation	10592173	kegg_mammalian
JAK1	P00533	Q01279	NA	Membrane	EGFR	P23458	P52332	NA	NA	binding	10592173	kegg_mammalian
JAK1	P43405	P48025	NA	Cytosol	SYK	P23458	P52332	NA	NA	Binding	10825200	BIND
JAK1	P43405	P48025	NA	Cytosol	SYK	P23458	P52332	NA	NA	Binding	10825200	ncbi_hprd
JAK1	P04626	P70424	Receptor	Membrane	ERBB2	P23458	P52332	NA	NA	binding	10592173	kegg_mammalian
KIT	P10721	P05532	Adapter	Cytosol	CRKL	P46109	P47941	NA	NA	Binding	9092574	BIND
KIT	P10721	P05532	Adapter	Cytosol	CRKL	P46109	P47941	NA	NA	Binding	9092574	ncbi_hprd
KIT	P10721	P05532	Adapter	Cytosol	CRKL	P46109	P47941	NA	NA	Binding	11071635	ncbi_hprd
KIT	P10721	P05532	Adapter	Cytosol	PIK3R2	O00459	O08908	NA	NA	binding	7537096	BIND
KIT	P10721	P05532	Adapter	Cytosol	PIK3R2	O00459	O08908	NA	NA	binding	7537096	ncbi_hprd
KIT	P10721	P05532	Adapter	Cytosol	PIK3R2	O00459	O08908	NA	NA	binding	10022833	ncbi_hprd
KIT	P10721	P05532	Adapter	Cytosol	PIK3R2	O00459	O08908	NA	NA	binding	10592173	kegg_mammalian
KIT	P10721	P05532	Adapter	Cytosol	STAT1	P42224	P42225	NA	Nucleus	Binding	9355737	BIND
KIT	P10721	P05532	Adapter	Cytosol	STAT1	P42224	P42225	NA	Nucleus	Binding	9355737	ncbi_hprd
KIT	P10721	P05532	Adapter	Cytosol	PTPN11	Q06124	P35235	NA	Cytosol	Binding	7523381	BIND
KIT	P10721	P05532	Adapter	Cytosol	PTPN11	Q06124	P35235	NA	Cytosol	Binding	7523381	ncbi_hprd
KIT	P10721	P05532	Adapter	Cytosol	PTPN11	Q06124	P35235	NA	Cytosol	Binding	9528781	BIND
KIT	P10721	P05532	Adapter	Cytosol	PTPN11	Q06124	P35235	NA	Cytosol	Binding	9528781	ncbi_hprd
KIT	P10721	P05532	Adapter	Cytosol	PIK3R3	Q92569	Q64143	NA	NA	binding	10592173	kegg_mammalian
KIT	P10721	P05532	Adapter	Cytosol	STAT3	P40763	P42227	NA	NA	binding	10592173	kegg_mammalian
KIT	P10721	P05532	Adapter	Cytosol	STAT5A	P42229	P42230	NA	Nucleus	binding	10592173	kegg_mammalian
KIT	P19174	Q62077	Phospholipase	Cytosol	PLCG1	P10721	P05532	Adapter	Cytosol	Binding	7536744	BIND
KIT	P19174	Q62077	Phospholipase	Cytosol	PLCG1	P10721	P05532	Adapter	Cytosol	Binding	7536744	ncbi_hprd
KIT	P19174	Q62077	Phospholipase	Cytosol	PLCG1	P10721	P05532	Adapter	Cytosol	Binding	10022833	ncbi_hprd
KIT	P19174	Q62077	Phospholipase	Cytosol	PLCG1	P10721	P05532	Adapter	Cytosol	Binding	11071635	ncbi_hprd
MAP2K1	Q02750	P31938	NA	NA	MAPK14	Q16539	P47811	NA	Cytosol	Binding	12697810	BIND
MAP2K1	Q02750	P31938	NA	NA	MAPK14	Q16539	P47811	NA	Cytosol	Binding	12697810	ncbi_hprd
MAP2K1	Q02750	P31938	NA	NA	RAF1	P04049	Q99N57	NA	Cytosol	phosphorylation	1326789	DIP
MAP2K1	Q02750	P31938	NA	NA	RAF1	P04049	Q99N57	NA	Cytosol	phosphorylation	8621729	ncbi_hprd
MAP2K1	Q02750	P31938	NA	NA	RAF1	P04049	Q99N57	NA	Cytosol	phosphorylation	10592173	kegg_mammalian
MAP2K1	Q02750	P31938	NA	NA	RAF1	P04049	Q99N57	NA	Cytosol	phosphorylation	10757792	ncbi_hprd
MAP2K1	Q02750	P31938	NA	NA	RAF1	P04049	Q99N57	NA	Cytosol	phosphorylation	11604401	BIND
MAP2K1	Q02750	P31938	NA	NA	RAF1	P04049	Q99N57	NA	Cytosol	phosphorylation	11604401	ncbi_hprd
MAP2K1	Q02750	P31938	NA	NA	RAF1	P04049	Q99N57	NA	Cytosol	phosphorylation	14724641	ncbi_hprd
MAP2K1	Q02750	P31938	NA	NA	RAF1	P04049	Q99N57	NA	Cytosol	phosphorylation	15866172	ncbi_hprd
MAP2K1	Q02750	P31938	NA	NA	MAPK8	P45983	Q91Y86	Kinase	Nucleus	phosphorylation	10592173	kegg_mammalian
MAP2K1	Q02750	P31938	NA	NA	MAPK9	P45984	Q9WTU6	NA	NA	phosphorylation	10592173	kegg_mammalian
MAP2K1	Q02750	P31938	NA	NA	MAPK10	P53779	Q61831	NA	NA	phosphorylation	10592173	kegg_mammalian
MAP2K2	P36507	Q63932	NA	NA	RAF1	P04049	Q99N57	NA	Cytosol	NA	10592173	kegg_mammalian
MAP2K2	P36507	Q63932	NA	NA	RAF1	P04049	Q99N57	NA	Cytosol	NA	16189514	BIND
MAP2K2	P36507	Q63932	NA	NA	RAF1	P04049	Q99N57	NA	Cytosol	NA	16189514	vidal
MAP2K2	P36507	Q63932	NA	NA	MAPK3	P27361	Q63844	NA	NA	phosphorylation	8226933	BIND
MAP2K2	P36507	Q63932	NA	NA	MAPK3	P27361	Q63844	NA	NA	phosphorylation	8226933	ncbi_hprd
MAP2K2	P36507	Q63932	NA	NA	MAPK3	P27361	Q63844	NA	NA	phosphorylation	8626767	BIND
MAP2K2	P36507	Q63932	NA	NA	MAPK3	P27361	Q63844	NA	NA	phosphorylation	8626767	ncbi_hprd
MAP2K2	P36507	Q63932	NA	NA	MAPK3	P27361	Q63844	NA	NA	phosphorylation	9006895	ncbi_hprd
MAP2K2	P36507	Q63932	NA	NA	MAPK3	P27361	Q63844	NA	NA	phosphorylation	10592173	kegg_mammalian
MAP2K2	P36507	Q63932	NA	NA	MAPK3	P27361	Q63844	NA	NA	phosphorylation	11134045	ncbi_hprd
MAP2K2	P36507	Q63932	NA	NA	MAPK1	P28482	P63085	Kinase	Cytosol	phosphorylation	10592173	kegg_mammalian
MAP2K2	P36507	Q63932	NA	NA	MAPK1	P28482	P63085	Kinase	Cytosol	phosphorylation	11134045	ncbi_hprd
MAP2K2	P36507	Q63932	NA	NA	MAPK1	P28482	P63085	Kinase	Cytosol	phosphorylation	11823456	BIND
MAP2K2	P36507	Q63932	NA	NA	MAPK1	P28482	P63085	Kinase	Cytosol	phosphorylation	11823456	ncbi_hprd
MAPK1	P28482	P63085	Kinase	Cytosol	STAT5A	P42229	P42230	NA	Nucleus	Binding	10194762	BIND
MAPK1	P28482	P63085	Kinase	Cytosol	STAT5A	P42229	P42230	NA	Nucleus	Binding	10194762	ncbi_hprd
MAPK1	P28482	P63085	Kinase	Cytosol	STAT5A	P42229	P42230	NA	Nucleus	Binding	10996427	BIND
MAPK1	P28482	P63085	Kinase	Cytosol	STAT5A	P42229	P42230	NA	Nucleus	Binding	10996427	ncbi_hprd
MAPK1	P28482	P63085	Kinase	Cytosol	SHC1	P29353	P98083	NA	Cytosol	Binding	10996427	BIND
MAPK1	P28482	P63085	Kinase	Cytosol	SHC1	P29353	P98083	NA	Cytosol	Binding	10996427	ncbi_hprd
MAPK1	P28482	P63085	Kinase	Cytosol	MAPK14	Q16539	P47811	NA	Cytosol	Binding	12697810	BIND
MAPK1	P28482	P63085	Kinase	Cytosol	MAPK14	Q16539	P47811	NA	Cytosol	Binding	12697810	ncbi_hprd
MAPK1	P28482	P63085	Kinase	Cytosol	MAPK14	Q16539	P47811	NA	Cytosol	Binding	17255949	ncbi_hprd
MAPK1	P28482	P63085	Kinase	Cytosol	MAP2K1	Q02750	P31938	NA	NA	phosphorylation	10592173	kegg_mammalian
MAPK1	P28482	P63085	Kinase	Cytosol	MAP2K1	Q02750	P31938	NA	NA	phosphorylation	11352917	BIND
MAPK1	P28482	P63085	Kinase	Cytosol	MAP2K1	Q02750	P31938	NA	NA	phosphorylation	11741894	BIND
MAPK1	P28482	P63085	Kinase	Cytosol	MAP2K1	Q02750	P31938	NA	NA	phosphorylation	11823456	BIND
MAPK1	P28482	P63085	Kinase	Cytosol	RPS6KA1	Q15418	P18653	NA	Cytosol	Phosphorylation	8202512	SAVI
MAPK1	P28482	P63085	Kinase	Cytosol	RPS6KA1	Q15418	P18653	NA	Cytosol	Phosphorylation	9915826	BIND
MAPK1	P28482	P63085	Kinase	Cytosol	RPS6KA1	Q15418	P18653	NA	Cytosol	Phosphorylation	9915826	ncbi_hprd
MAPK1	P28482	P63085	Kinase	Cytosol	RPS6KA1	Q15418	P18653	NA	Cytosol	Phosphorylation	10592173	kegg_mammalian
MAPK1	P28482	P63085	Kinase	Cytosol	RPS6KA1	Q15418	P18653	NA	Cytosol	Phosphorylation	11500364	SAVI
MAPK1	P28482	P63085	Kinase	Cytosol	RPS6KA1	Q15418	P18653	NA	Cytosol	Phosphorylation	12594221	BIND
MAPK1	P28482	P63085	Kinase	Cytosol	RPS6KA1	Q15418	P18653	NA	Cytosol	Phosphorylation	12594221	ncbi_hprd
MAPK1	P28482	P63085	Kinase	Cytosol	RPS6KA1	Q15418	P18653	NA	Cytosol	Phosphorylation	12832467	BIND
MAPK1	P28482	P63085	Kinase	Cytosol	RPS6KA1	Q15418	P18653	NA	Cytosol	Phosphorylation	12832467	ncbi_hprd
MAPK10	P53779	Q61831	NA	NA	CRK	P46108	Q64010	NA	Cytosol	binding	10592173	kegg_mammalian
MAPK10	P53779	Q61831	NA	NA	CRKL	P46109	P47941	NA	NA	binding	10592173	kegg_mammalian
MAPK10	P53779	Q61831	NA	NA	IRS1	P35568	P35569	Adapter	Cytosol	phosphorylation	10592173	kegg_mammalian
MAPK11	Q16539	P47811	NA	Cytosol	MAPK14	Q15759	Q9WUI1	NA	NA	bindng	10967325	IntAct
MAPK11	Q16539	P47811	NA	Cytosol	MAPK14	Q15759	Q9WUI1	NA	NA	bindng	12634794	IntAct
MAPK11	Q16539	P47811	NA	Cytosol	MAPK14	Q15759	Q9WUI1	NA	NA	bindng	15102471	IntAct
MAPK12	Q16539	P47811	NA	Cytosol	MAPK14	P53778	O08911	NA	Cytosol	bindng	10967325	IntAct
MAPK12	Q16539	P47811	NA	Cytosol	MAPK14	P53778	O08911	NA	Cytosol	bindng	12634794	IntAct
MAPK12	Q16539	P47811	NA	Cytosol	MAPK14	P53778	O08911	NA	Cytosol	bindng	15102471	IntAct
MAPK14	Q16539	P47811	NA	Cytosol	MAPK12	P53778	O08911	NA	Cytosol	bindng	10967325	IntAct
MAPK14	Q16539	P47811	NA	Cytosol	MAPK12	P53778	O08911	NA	Cytosol	bindng	12634794	IntAct
MAPK14	Q16539	P47811	NA	Cytosol	MAPK12	P53778	O08911	NA	Cytosol	bindng	15102471	IntAct
MAPK14	Q16539	P47811	NA	Cytosol	MAPK11	Q15759	Q9WUI1	NA	NA	bindng	10967325	IntAct
MAPK14	Q16539	P47811	NA	Cytosol	MAPK11	Q15759	Q9WUI1	NA	NA	bindng	12634794	IntAct
MAPK14	Q16539	P47811	NA	Cytosol	MAPK11	Q15759	Q9WUI1	NA	NA	bindng	15102471	IntAct
MAPK14	Q16539	P47811	NA	Cytosol	STAT1	P42224	P42225	NA	Nucleus	Phosphorylation	10201984	SAVI
MAPK14	P28482	P63085	Kinase	Cytosol	MAPK1	Q16539	P47811	NA	Cytosol	Binding	12697810	BIND
MAPK14	P28482	P63085	Kinase	Cytosol	MAPK1	Q16539	P47811	NA	Cytosol	Binding	12697810	ncbi_hprd
MAPK14	P28482	P63085	Kinase	Cytosol	MAPK1	Q16539	P47811	NA	Cytosol	Binding	17255949	ncbi_hprd
MAPK14	P27361	Q63844	NA	NA	MAPK3	Q16539	P47811	NA	Cytosol	Binding	12697810	BIND
MAPK14	P27361	Q63844	NA	NA	MAPK3	Q16539	P47811	NA	Cytosol	Binding	12697810	ncbi_hprd
MAPK14	Q02750	P31938	NA	NA	MAP2K1	Q16539	P47811	NA	Cytosol	Binding	12697810	BIND
MAPK14	Q02750	P31938	NA	NA	MAP2K1	Q16539	P47811	NA	Cytosol	Binding	12697810	ncbi_hprd
MAPK14	P16220	Q01147	NA	Nucleus	CREB1	Q16539	P47811	NA	Cytosol	NA	11377386	BIND
MAPK14	P16220	Q01147	NA	Nucleus	CREB1	Q16539	P47811	NA	Cytosol	NA	11377386	ncbi_hprd
MAPK14	P16220	Q01147	NA	Nucleus	CREB1	Q16539	P47811	NA	Cytosol	NA	16189514	BIND
MAPK14	P16220	Q01147	NA	Nucleus	CREB1	Q16539	P47811	NA	Cytosol	NA	16189514	vidal
MAPK14	P16220	Q01147	NA	Nucleus	CREB1	Q16539	P47811	NA	Cytosol	NA	16189514	ncbi_hprd
MAPK3	P27361	Q63844	NA	NA	MAPK14	Q16539	P47811	NA	Cytosol	Binding	12697810	BIND
MAPK3	P27361	Q63844	NA	NA	MAPK14	Q16539	P47811	NA	Cytosol	Binding	12697810	ncbi_hprd
MAPK3	P27361	Q63844	NA	NA	GAB2	Q9UQC2	Q9Z1S8	NA	NA	Binding	15356145	MINT
MAPK3	P27361	Q63844	NA	NA	RPS6KA1	Q15418	P18653	NA	Cytosol	phosphorylation	9915826	MINT
MAPK3	P27361	Q63844	NA	NA	RPS6KA1	Q15418	P18653	NA	Cytosol	phosphorylation	9915826	ncbi_hprd
MAPK3	P27361	Q63844	NA	NA	RPS6KA1	Q15418	P18653	NA	Cytosol	phosphorylation	10592173	kegg_mammalian
MAPK3	P27361	Q63844	NA	NA	RPS6KA1	Q15418	P18653	NA	Cytosol	phosphorylation	12832467	BIND
MAPK3	P27361	Q63844	NA	NA	RPS6KA1	Q15418	P18653	NA	Cytosol	phosphorylation	12832467	ncbi_hprd
MAPK3	P27361	Q63844	NA	NA	MAP2K1	Q02750	P31938	NA	NA	phosphorylation	8226933	BIND
MAPK3	P27361	Q63844	NA	NA	MAP2K1	Q02750	P31938	NA	NA	phosphorylation	8226933	ncbi_hprd
MAPK3	P27361	Q63844	NA	NA	MAP2K1	Q02750	P31938	NA	NA	phosphorylation	8626767	BIND
MAPK3	P27361	Q63844	NA	NA	MAP2K1	Q02750	P31938	NA	NA	phosphorylation	8626767	ncbi_hprd
MAPK3	P27361	Q63844	NA	NA	MAP2K1	Q02750	P31938	NA	NA	phosphorylation	9006895	ncbi_hprd
MAPK3	P27361	Q63844	NA	NA	MAP2K1	Q02750	P31938	NA	NA	phosphorylation	10592173	kegg_mammalian
MAPK3	P27361	Q63844	NA	NA	MAP2K1	Q02750	P31938	NA	NA	phosphorylation	10748187	BIND
MAPK3	P27361	Q63844	NA	NA	MAP2K1	Q02750	P31938	NA	NA	phosphorylation	10748187	ncbi_hprd
MAPK3	P27361	Q63844	NA	NA	MAP2K1	Q02750	P31938	NA	NA	phosphorylation	11134045	ncbi_hprd
MAPK8	P45983	Q91Y86	Kinase	Nucleus	CRKL	P46109	P47941	NA	NA	binding	10592173	kegg_mammalian
MAPK8	P45983	Q91Y86	Kinase	Nucleus	IRS1	P35568	P35569	Adapter	Cytosol	Phosphorylation	10592173	kegg_mammalian
MAPK8	P45983	Q91Y86	Kinase	Nucleus	IRS1	P35568	P35569	Adapter	Cytosol	Phosphorylation	10722755	BIND
MAPK8	P45983	Q91Y86	Kinase	Nucleus	IRS1	P35568	P35569	Adapter	Cytosol	Phosphorylation	10722755	ncbi_hprd
MAPK8	P45983	Q91Y86	Kinase	Nucleus	IRS1	P35568	P35569	Adapter	Cytosol	Phosphorylation	11606564	BIND
MAPK8	P45983	Q91Y86	Kinase	Nucleus	IRS1	P35568	P35569	Adapter	Cytosol	Phosphorylation	11606564	ncbi_hprd
MAPK8	P45983	Q91Y86	Kinase	Nucleus	IRS1	P35568	P35569	Adapter	Cytosol	Phosphorylation	12417588	BIND
MAPK8	P45983	Q91Y86	Kinase	Nucleus	IRS1	P35568	P35569	Adapter	Cytosol	Phosphorylation	12417588	ncbi_hprd
MAPK8	P45983	Q91Y86	Kinase	Nucleus	IRS1	P35568	P35569	Adapter	Cytosol	Phosphorylation	16055440	SAVI
MAPK8	P46108	Q64010	NA	Cytosol	CRK	P45983	Q91Y86	Kinase	Nucleus	binding	10592173	kegg_mammalian
MAPK8	P46108	Q64010	NA	Cytosol	CRK	P45983	Q91Y86	Kinase	Nucleus	binding	11432831	BIND
MAPK8	P46108	Q64010	NA	Cytosol	CRK	P45983	Q91Y86	Kinase	Nucleus	binding	11432831	ncbi_hprd
MAPK9	P45984	Q9WTU6	NA	NA	CRK	P46108	Q64010	NA	Cytosol	binding	10592173	kegg_mammalian
MAPK9	P45984	Q9WTU6	NA	NA	CRKL	P46109	P47941	NA	NA	binding	10592173	kegg_mammalian
MAPK9	P45984	Q9WTU6	NA	NA	IRS1	P35568	P35569	Adapter	Cytosol	phosphorylation	10592173	kegg_mammalian
MAPK9	P45984	Q9WTU6	NA	NA	IRS1	P35568	P35569	Adapter	Cytosol	phosphorylation	12417588	BIND
MAPK9	P45984	Q9WTU6	NA	NA	IRS1	P35568	P35569	Adapter	Cytosol	phosphorylation	12417588	ncbi_hprd
MET	P08581	P16056	NA	NA	STAT3	P40763	P42227	NA	NA	Binding	9440692	BIND
MET	P08581	P16056	NA	NA	STAT3	P40763	P42227	NA	NA	Binding	9440692	ncbi_hprd
MET	P08581	P16056	NA	NA	SHC1	P29353	P98083	NA	Cytosol	binding	7731718	BIND
MET	P08581	P16056	NA	NA	SHC1	P29353	P98083	NA	Cytosol	binding	7731718	ncbi_hprd
MET	P08581	P16056	NA	NA	SHC1	P29353	P98083	NA	Cytosol	binding	10592173	kegg_mammalian
MET	P08581	P16056	NA	NA	SRC	P12931	P05480	NA	Cytosol	Binding	9837958	BIND
MET	P08581	P16056	NA	NA	SRC	P12931	P05480	NA	Cytosol	Binding	9837958	ncbi_hprd
MET	P08581	P16056	NA	NA	PIK3R2	O00459	O08908	NA	NA	binding	10592173	kegg_mammalian
MET	P08581	P16056	NA	NA	PIK3R3	Q92569	Q64143	NA	NA	binding	10592173	kegg_mammalian
MET	Q06124	P35235	NA	Cytosol	PTPN11	P08581	P16056	NA	NA	Binding	8662733	BIND
MET	Q06124	P35235	NA	Cytosol	PTPN11	P08581	P16056	NA	NA	Binding	8662733	ncbi_hprd
PDGFRA	P16234	P26618	NA	NA	CRKL	P46109	P47941	NA	NA	Binding	9546424	BIND
PDGFRA	P16234	P26618	NA	NA	CRKL	P46109	P47941	NA	NA	Binding	9546424	ncbi_hprd
PDGFRA	P16234	P26618	NA	NA	PLCG2	P16885	NA	NA	NA	binding	10592173	kegg_mammalian
PDGFRA	P16234	P26618	NA	NA	PIK3R2	O00459	O08908	NA	NA	binding	10592173	kegg_mammalian
PDGFRA	P16234	P26618	NA	NA	PIK3R3	Q92569	Q64143	NA	NA	binding	10592173	kegg_mammalian
PDGFRA	P16234	P26618	NA	NA	SHC1	P29353	P98083	NA	Cytosol	binding	10592173	kegg_mammalian
PDGFRA	P16234	P26618	NA	NA	SRC	P12931	P05480	NA	Cytosol	binding	10592173	kegg_mammalian
PDGFRA	P16234	P26618	NA	NA	PTPN11	Q06124	P35235	NA	Cytosol	NA	8943348	BIND
PDGFRA	P16234	P26618	NA	NA	PTPN11	Q06124	P35235	NA	Cytosol	NA	16189514	BIND
PDGFRA	P16234	P26618	NA	NA	PTPN11	Q06124	P35235	NA	Cytosol	NA	16189514	vidal
PDGFRA	P19174	Q62077	Phospholipase	Cytosol	PLCG1	P16234	P26618	NA	NA	binding	7535778	BIND
PDGFRA	P19174	Q62077	Phospholipase	Cytosol	PLCG1	P16234	P26618	NA	NA	binding	7535778	ncbi_hprd
PDGFRA	P19174	Q62077	Phospholipase	Cytosol	PLCG1	P16234	P26618	NA	NA	binding	10592173	kegg_mammalian
PDGFRA	P46108	Q64010	NA	Cytosol	CRK	P16234	P26618	NA	NA	NA	9546424	BIND
PDGFRA	P46108	Q64010	NA	Cytosol	CRK	P16234	P26618	NA	NA	NA	9546424	ncbi_hprd
PDGFRA	P46108	Q64010	NA	Cytosol	CRK	P16234	P26618	NA	NA	NA	10733900	BIND
PDGFRA	P46108	Q64010	NA	Cytosol	CRK	P16234	P26618	NA	NA	NA	10733900	ncbi_hprd
PDGFRA	P46108	Q64010	NA	Cytosol	CRK	P16234	P26618	NA	NA	NA	16189514	BIND
PDGFRA	P46108	Q64010	NA	Cytosol	CRK	P16234	P26618	NA	NA	NA	16189514	vidal
PDGFRA	P46108	Q64010	NA	Cytosol	CRK	P16234	P26618	NA	NA	NA	16189514	ncbi_hprd
PDGFRA	P09619	P05622	NA	Membrane	PDGFRB	P16234	P26618	NA	NA	NA	1847074	BIND
PDGFRA	P09619	P05622	NA	Membrane	PDGFRB	P16234	P26618	NA	NA	NA	2161888	BIND
PDGFRA	P09619	P05622	NA	Membrane	PDGFRB	P16234	P26618	NA	NA	NA	2542288	BIND
PDGFRA	P09619	P05622	NA	Membrane	PDGFRB	P16234	P26618	NA	NA	NA	7523122	BIND
PDGFRA	P09619	P05622	NA	Membrane	PDGFRB	P16234	P26618	NA	NA	NA	16189514	BIND
PDGFRA	P09619	P05622	NA	Membrane	PDGFRB	P16234	P26618	NA	NA	NA	16189514	vidal
PDGFRB	P09619	P05622	NA	Membrane	PLCG2	P16885	NA	NA	NA	binding	10592173	kegg_mammalian
PDGFRB	P09619	P05622	NA	Membrane	PIK3R2	O00459	O08908	NA	NA	binding	10592173	kegg_mammalian
PDGFRB	P09619	P05622	NA	Membrane	PDGFRA	P16234	P26618	NA	NA	NA	1847074	BIND
PDGFRB	P09619	P05622	NA	Membrane	PDGFRA	P16234	P26618	NA	NA	NA	2161888	BIND
PDGFRB	P09619	P05622	NA	Membrane	PDGFRA	P16234	P26618	NA	NA	NA	2542288	BIND
PDGFRB	P09619	P05622	NA	Membrane	PDGFRA	P16234	P26618	NA	NA	NA	7523122	BIND
PDGFRB	P09619	P05622	NA	Membrane	PDGFRA	P16234	P26618	NA	NA	NA	16189514	BIND
PDGFRB	P09619	P05622	NA	Membrane	PDGFRA	P16234	P26618	NA	NA	NA	16189514	vidal
PDGFRB	P09619	P05622	NA	Membrane	SHC1	P29353	P98083	NA	Cytosol	NA	8195171	BIND
PDGFRB	P09619	P05622	NA	Membrane	SHC1	P29353	P98083	NA	Cytosol	NA	8195171	ncbi_hprd
PDGFRB	P09619	P05622	NA	Membrane	SHC1	P29353	P98083	NA	Cytosol	NA	8890167	ncbi_hprd
PDGFRB	P09619	P05622	NA	Membrane	SHC1	P29353	P98083	NA	Cytosol	NA	10592173	kegg_mammalian
PDGFRB	P09619	P05622	NA	Membrane	SHC1	P29353	P98083	NA	Cytosol	NA	16189514	BIND
PDGFRB	P09619	P05622	NA	Membrane	SHC1	P29353	P98083	NA	Cytosol	NA	16189514	vidal
PDGFRB	P09619	P05622	NA	Membrane	SHC1	P29353	P98083	NA	Cytosol	NA	16189514	ncbi_hprd
PDGFRB	P09619	P05622	NA	Membrane	CRK	P46108	Q64010	NA	Cytosol	NA	2173144	ncbi_hprd
PDGFRB	P09619	P05622	NA	Membrane	CRK	P46108	Q64010	NA	Cytosol	NA	10733900	BIND
PDGFRB	P09619	P05622	NA	Membrane	CRK	P46108	Q64010	NA	Cytosol	NA	10733900	ncbi_hprd
PDGFRB	P09619	P05622	NA	Membrane	CRK	P46108	Q64010	NA	Cytosol	NA	16189514	BIND
PDGFRB	P09619	P05622	NA	Membrane	CRK	P46108	Q64010	NA	Cytosol	NA	16189514	vidal
PDGFRB	P09619	P05622	NA	Membrane	CRK	P46108	Q64010	NA	Cytosol	NA	16189514	ncbi_hprd
PDGFRB	P09619	P05622	NA	Membrane	RAF1	P04049	Q99N57	NA	Cytosol	NA	2475255	BIND
PDGFRB	P09619	P05622	NA	Membrane	RAF1	P04049	Q99N57	NA	Cytosol	NA	2475255	ncbi_hprd
PDGFRB	P09619	P05622	NA	Membrane	RAF1	P04049	Q99N57	NA	Cytosol	NA	16189514	BIND
PDGFRB	P09619	P05622	NA	Membrane	RAF1	P04049	Q99N57	NA	Cytosol	NA	16189514	vidal
PDGFRB	P09619	P05622	NA	Membrane	RAF1	P04049	Q99N57	NA	Cytosol	NA	16189514	ncbi_hprd
PDGFRB	P09619	P05622	NA	Membrane	SRC	P12931	P05480	NA	Cytosol	NA	10592173	kegg_mammalian
PDGFRB	P09619	P05622	NA	Membrane	SRC	P12931	P05480	NA	Cytosol	NA	16189514	BIND
PDGFRB	P09619	P05622	NA	Membrane	SRC	P12931	P05480	NA	Cytosol	NA	16189514	vidal
PDGFRB	P09619	P05622	NA	Membrane	PIK3R3	Q92569	Q64143	NA	NA	NA	10592173	kegg_mammalian
PDGFRB	P09619	P05622	NA	Membrane	PIK3R3	Q92569	Q64143	NA	NA	NA	16189514	BIND
PDGFRB	P09619	P05622	NA	Membrane	PIK3R3	Q92569	Q64143	NA	NA	NA	16189514	vidal
PDGFRB	P00533	Q01279	NA	Membrane	EGFR	P09619	P05622	NA	Membrane	Binding	9506992	BIND
PDGFRB	P00533	Q01279	NA	Membrane	EGFR	P09619	P05622	NA	Membrane	Binding	9506992	ncbi_hprd
PDGFRB	Q06124	P35235	NA	Cytosol	PTPN11	P09619	P05622	NA	Membrane	NA	7688466	SAVI
PDGFRB	Q06124	P35235	NA	Cytosol	PTPN11	P09619	P05622	NA	Membrane	NA	7691811	BIND
PDGFRB	Q06124	P35235	NA	Cytosol	PTPN11	P09619	P05622	NA	Membrane	NA	8226787	SAVI
PDGFRB	Q06124	P35235	NA	Cytosol	PTPN11	P09619	P05622	NA	Membrane	NA	16189514	BIND
PDGFRB	Q06124	P35235	NA	Cytosol	PTPN11	P09619	P05622	NA	Membrane	NA	16189514	vidal
PDPK1	O15530	Q9Z2A0	NA	Cytosol	PRKCD	Q05655	P28867	NA	NA	Binding	11781095	BIND
PDPK1	O15530	Q9Z2A0	NA	Cytosol	PRKCD	Q05655	P28867	NA	NA	Binding	11781095	ncbi_hprd
PDPK1	O15530	Q9Z2A0	NA	Cytosol	FRAP1	P42345	Q9JLN9	Kinase	Cytosol	Binding	11438723	MINT
PDPK1	O15530	Q9Z2A0	NA	Cytosol	AKT1	P31749	P31750	NA	Cytosol	Phosphorylation	9094314	SAVI
PDPK1	O15530	Q9Z2A0	NA	Cytosol	AKT1	P31749	P31750	NA	Cytosol	Phosphorylation	10592173	kegg_mammalian
PDPK1	O15530	Q9Z2A0	NA	Cytosol	AKT1	P31749	P31750	NA	Cytosol	Phosphorylation	11438723	MINT
PDPK1	O15530	Q9Z2A0	NA	Cytosol	AKT1	P31749	P31750	NA	Cytosol	Phosphorylation	11825911	BIND
PDPK1	O15530	Q9Z2A0	NA	Cytosol	AKT1	P31749	P31750	NA	Cytosol	Phosphorylation	11825911	ncbi_hprd
PDPK1	O15530	Q9Z2A0	NA	Cytosol	AKT1	P31749	P31750	NA	Cytosol	Phosphorylation	15718470	ncbi_hprd
PDPK1	O15530	Q9Z2A0	NA	Cytosol	AKT1	P31749	P31750	NA	Cytosol	Phosphorylation	16189514	BIND
PDPK1	O15530	Q9Z2A0	NA	Cytosol	AKT1	P31749	P31750	NA	Cytosol	Phosphorylation	16189514	vidal
PDPK1	O15530	Q9Z2A0	NA	Cytosol	AKT1	P31749	P31750	NA	Cytosol	Phosphorylation	16189514	ncbi_hprd
PDPK1	O15530	Q9Z2A0	NA	Cytosol	RPS6KB1	P23443	Q8BSK8	Kinase	Cytosol	Phosphorylation	9427642	SAVI
PDPK1	O15530	Q9Z2A0	NA	Cytosol	RPS6KB1	P23443	Q8BSK8	Kinase	Cytosol	Phosphorylation	10592173	kegg_mammalian
PDPK1	O15530	Q9Z2A0	NA	Cytosol	RPS6KB1	P23443	Q8BSK8	Kinase	Cytosol	Phosphorylation	11438723	MINT
PDPK1	O15530	Q9Z2A0	NA	Cytosol	RPS6KB1	P23443	Q8BSK8	Kinase	Cytosol	Phosphorylation	11438723	ncbi_hprd
PDPK1	O15530	Q9Z2A0	NA	Cytosol	RPS6KA1	Q15418	P18653	NA	Cytosol	Phosphorylation	10480933	SAVI
PDPK1	O00459	O08908	NA	NA	PIK3R2	O15530	Q9Z2A0	NA	Cytosol	binding	10592173	kegg_mammalian
PDPK1	Q92569	Q64143	NA	NA	PIK3R3	O15530	Q9Z2A0	NA	Cytosol	binding	10592173	kegg_mammalian
PIK3R2	O00459	O08908	NA	NA	SHC1	P29353	P98083	NA	Cytosol	Binding	8662998	BIND
PIK3R2	O00459	O08908	NA	NA	SHC1	P29353	P98083	NA	Cytosol	Binding	8662998	ncbi_hprd
PIK3R2	O00459	O08908	NA	NA	CRKL	P46109	P47941	NA	NA	Binding	9092574	BIND
PIK3R2	O00459	O08908	NA	NA	CRKL	P46109	P47941	NA	NA	Binding	9092574	ncbi_hprd
PIK3R2	O00459	O08908	NA	NA	PDPK1	O15530	Q9Z2A0	NA	Cytosol	binding	10592173	kegg_mammalian
PIK3R2	O00459	O08908	NA	NA	IRS1	P35568	P35569	Adapter	Cytosol	compound	10592173	kegg_mammalian
PIK3R2	O00459	O08908	NA	NA	IRS1	P35568	P35569	Adapter	Cytosol	compound	11120660	BIND
PIK3R2	O00459	O08908	NA	NA	IRS1	P35568	P35569	Adapter	Cytosol	compound	11120660	ncbi_hprd
PIK3R2	O00459	O08908	NA	NA	IRS1	P35568	P35569	Adapter	Cytosol	compound	11172806	ncbi_hprd
PIK3R2	P12931	P05480	NA	Cytosol	SRC	O00459	O08908	NA	NA	binding	10592173	kegg_mammalian
PIK3R2	P00533	Q01279	NA	Membrane	EGFR	O00459	O08908	NA	NA	binding	10592173	kegg_mammalian
PIK3R2	P43405	P48025	NA	Cytosol	SYK	O00459	O08908	NA	NA	binding	10592173	kegg_mammalian
PIK3R2	P43405	P48025	NA	Cytosol	SYK	O00459	O08908	NA	NA	binding	15536084	MINT
PIK3R2	P10721	P05532	Adapter	Cytosol	KIT	O00459	O08908	NA	NA	binding	7537096	BIND
PIK3R2	P10721	P05532	Adapter	Cytosol	KIT	O00459	O08908	NA	NA	binding	7537096	ncbi_hprd
PIK3R2	P10721	P05532	Adapter	Cytosol	KIT	O00459	O08908	NA	NA	binding	10022833	ncbi_hprd
PIK3R2	P10721	P05532	Adapter	Cytosol	KIT	O00459	O08908	NA	NA	binding	10592173	kegg_mammalian
PIK3R2	P08069	Q60751	Receptor	Cytosol	IGF1R	O00459	O08908	NA	NA	binding	10592173	kegg_mammalian
PIK3R2	P08581	P16056	NA	NA	MET	O00459	O08908	NA	NA	binding	10592173	kegg_mammalian
PIK3R2	P11362	P16092	NA	NA	FGFR1	O00459	O08908	NA	NA	binding	10592173	kegg_mammalian
PIK3R2	Q13480	Q9QYY0	Adapter	Cytosol	GAB1	O00459	O08908	NA	NA	binding	10592173	kegg_mammalian
PIK3R2	Q9UQC2	Q9Z1S8	NA	NA	GAB2	O00459	O08908	NA	NA	binding	10592173	kegg_mammalian
PIK3R2	P16234	P26618	NA	NA	PDGFRA	O00459	O08908	NA	NA	binding	10592173	kegg_mammalian
PIK3R2	P09619	P05622	NA	Membrane	PDGFRB	O00459	O08908	NA	NA	binding	10592173	kegg_mammalian
PIK3R2	P43403	P43404	NA	Cytosol	ZAP70	O00459	O08908	NA	NA	binding	10592173	kegg_mammalian
PIK3R2	P04626	P70424	Receptor	Membrane	ERBB2	O00459	O08908	NA	NA	binding	1334406	BIND
PIK3R2	P04626	P70424	Receptor	Membrane	ERBB2	O00459	O08908	NA	NA	binding	1334406	ncbi_hprd
PIK3R2	P04626	P70424	Receptor	Membrane	ERBB2	O00459	O08908	NA	NA	binding	10592173	kegg_mammalian
PIK3R2	P04626	P70424	Receptor	Membrane	ERBB2	O00459	O08908	NA	NA	binding	16273093	ncbi_hprd
PIK3R3	Q92569	Q64143	NA	NA	IGF1R	P08069	Q60751	Receptor	Cytosol	binding	9415396	BIND
PIK3R3	Q92569	Q64143	NA	NA	IGF1R	P08069	Q60751	Receptor	Cytosol	binding	9415396	ncbi_hprd
PIK3R3	Q92569	Q64143	NA	NA	IGF1R	P08069	Q60751	Receptor	Cytosol	binding	9524259	BIND
PIK3R3	Q92569	Q64143	NA	NA	IGF1R	P08069	Q60751	Receptor	Cytosol	binding	9524259	ncbi_hprd
PIK3R3	Q92569	Q64143	NA	NA	IGF1R	P08069	Q60751	Receptor	Cytosol	binding	10592173	kegg_mammalian
PIK3R3	Q92569	Q64143	NA	NA	PDPK1	O15530	Q9Z2A0	NA	Cytosol	binding	10592173	kegg_mammalian
PIK3R3	Q92569	Q64143	NA	NA	IRS1	P35568	P35569	Adapter	Cytosol	compound	7542745	BIND
PIK3R3	Q92569	Q64143	NA	NA	IRS1	P35568	P35569	Adapter	Cytosol	compound	7542745	ncbi_hprd
PIK3R3	Q92569	Q64143	NA	NA	IRS1	P35568	P35569	Adapter	Cytosol	compound	9415396	BIND
PIK3R3	Q92569	Q64143	NA	NA	IRS1	P35568	P35569	Adapter	Cytosol	compound	9415396	ncbi_hprd
PIK3R3	Q92569	Q64143	NA	NA	IRS1	P35568	P35569	Adapter	Cytosol	compound	10417350	BIND
PIK3R3	Q92569	Q64143	NA	NA	IRS1	P35568	P35569	Adapter	Cytosol	compound	10417350	ncbi_hprd
PIK3R3	Q92569	Q64143	NA	NA	IRS1	P35568	P35569	Adapter	Cytosol	compound	10592173	kegg_mammalian
PIK3R3	P12931	P05480	NA	Cytosol	SRC	Q92569	Q64143	NA	NA	binding	10592173	kegg_mammalian
PIK3R3	P00533	Q01279	NA	Membrane	EGFR	Q92569	Q64143	NA	NA	binding	10592173	kegg_mammalian
PIK3R3	P43405	P48025	NA	Cytosol	SYK	Q92569	Q64143	NA	NA	binding	10592173	kegg_mammalian
PIK3R3	P10721	P05532	Adapter	Cytosol	KIT	Q92569	Q64143	NA	NA	binding	10592173	kegg_mammalian
PIK3R3	P08581	P16056	NA	NA	MET	Q92569	Q64143	NA	NA	binding	10592173	kegg_mammalian
PIK3R3	P11362	P16092	NA	NA	FGFR1	Q92569	Q64143	NA	NA	binding	10592173	kegg_mammalian
PIK3R3	Q13480	Q9QYY0	Adapter	Cytosol	GAB1	Q92569	Q64143	NA	NA	binding	10592173	kegg_mammalian
PIK3R3	Q9UQC2	Q9Z1S8	NA	NA	GAB2	Q92569	Q64143	NA	NA	binding	10592173	kegg_mammalian
PIK3R3	P16234	P26618	NA	NA	PDGFRA	Q92569	Q64143	NA	NA	binding	10592173	kegg_mammalian
PIK3R3	P43403	P43404	NA	Cytosol	ZAP70	Q92569	Q64143	NA	NA	binding	10592173	kegg_mammalian
PIK3R3	P04626	P70424	Receptor	Membrane	ERBB2	Q92569	Q64143	NA	NA	binding	10592173	kegg_mammalian
PIK3R3	P09619	P05622	NA	Membrane	PDGFRB	Q92569	Q64143	NA	NA	NA	10592173	kegg_mammalian
PIK3R3	P09619	P05622	NA	Membrane	PDGFRB	Q92569	Q64143	NA	NA	NA	16189514	BIND
PIK3R3	P09619	P05622	NA	Membrane	PDGFRB	Q92569	Q64143	NA	NA	NA	16189514	vidal
PLCG1	P19174	Q62077	Phospholipase	Cytosol	KIT	P10721	P05532	Adapter	Cytosol	Binding	7536744	BIND
PLCG1	P19174	Q62077	Phospholipase	Cytosol	KIT	P10721	P05532	Adapter	Cytosol	Binding	7536744	ncbi_hprd
PLCG1	P19174	Q62077	Phospholipase	Cytosol	KIT	P10721	P05532	Adapter	Cytosol	Binding	10022833	ncbi_hprd
PLCG1	P19174	Q62077	Phospholipase	Cytosol	KIT	P10721	P05532	Adapter	Cytosol	Binding	11071635	ncbi_hprd
PLCG1	P19174	Q62077	Phospholipase	Cytosol	GAB1	Q13480	Q9QYY0	Adapter	Cytosol	Binding	8596638	BIND
PLCG1	P19174	Q62077	Phospholipase	Cytosol	GAB1	Q13480	Q9QYY0	Adapter	Cytosol	Binding	8596638	ncbi_hprd
PLCG1	P19174	Q62077	Phospholipase	Cytosol	GAB1	Q13480	Q9QYY0	Adapter	Cytosol	Binding	11507676	ncbi_hprd
PLCG1	P19174	Q62077	Phospholipase	Cytosol	PLCG2	P16885	NA	NA	NA	Binding	8885868	BIND
PLCG1	P19174	Q62077	Phospholipase	Cytosol	PLCG2	P16885	NA	NA	NA	Binding	8885868	ncbi_hprd
PLCG1	P19174	Q62077	Phospholipase	Cytosol	PDGFRA	P16234	P26618	NA	NA	binding	7535778	BIND
PLCG1	P19174	Q62077	Phospholipase	Cytosol	PDGFRA	P16234	P26618	NA	NA	binding	7535778	ncbi_hprd
PLCG1	P19174	Q62077	Phospholipase	Cytosol	PDGFRA	P16234	P26618	NA	NA	binding	10592173	kegg_mammalian
PLCG1	P19174	Q62077	Phospholipase	Cytosol	ERBB2	P04626	P70424	Receptor	Membrane	binding	1676673	BIND
PLCG1	P19174	Q62077	Phospholipase	Cytosol	ERBB2	P04626	P70424	Receptor	Membrane	binding	1676673	ncbi_hprd
PLCG1	P19174	Q62077	Phospholipase	Cytosol	ERBB2	P04626	P70424	Receptor	Membrane	binding	1683701	BIND
PLCG1	P19174	Q62077	Phospholipase	Cytosol	ERBB2	P04626	P70424	Receptor	Membrane	binding	1683701	ncbi_hprd
PLCG1	P19174	Q62077	Phospholipase	Cytosol	ERBB2	P04626	P70424	Receptor	Membrane	binding	10592173	kegg_mammalian
PLCG1	P19174	Q62077	Phospholipase	Cytosol	ERBB2	P04626	P70424	Receptor	Membrane	binding	16273093	ncbi_hprd
PLCG1	P19174	Q62077	Phospholipase	Cytosol	ZAP70	P43403	P43404	NA	Cytosol	Binding	7629168	BIND
PLCG1	P19174	Q62077	Phospholipase	Cytosol	ZAP70	P43403	P43404	NA	Cytosol	Binding	7629168	ncbi_hprd
PLCG1	P19174	Q62077	Phospholipase	Cytosol	PRKCG	P05129	P63318	NA	NA	binding	10592173	kegg_mammalian
PLCG1	P19174	Q62077	Phospholipase	Cytosol	SYK	P43405	P48025	NA	Cytosol	Phosphorylation	7744830	SAVI
PLCG1	P19174	Q62077	Phospholipase	Cytosol	SYK	P43405	P48025	NA	Cytosol	Phosphorylation	7831290	DIP
PLCG1	P19174	Q62077	Phospholipase	Cytosol	SYK	P43405	P48025	NA	Cytosol	Phosphorylation	7831290	ncbi_hprd
PLCG1	P19174	Q62077	Phospholipase	Cytosol	SYK	P43405	P48025	NA	Cytosol	Phosphorylation	8657103	SAVI
PLCG1	P19174	Q62077	Phospholipase	Cytosol	SYK	P43405	P48025	NA	Cytosol	Phosphorylation	8885868	BIND
PLCG1	P19174	Q62077	Phospholipase	Cytosol	SYK	P43405	P48025	NA	Cytosol	Phosphorylation	8885868	ncbi_hprd
PLCG1	P19174	Q62077	Phospholipase	Cytosol	SYK	P43405	P48025	NA	Cytosol	Phosphorylation	10592173	kegg_mammalian
PLCG1	P19174	Q62077	Phospholipase	Cytosol	SRC	P12931	P05480	NA	Cytosol	Phosphorylation	7510703	BIND
PLCG1	P19174	Q62077	Phospholipase	Cytosol	SRC	P12931	P05480	NA	Cytosol	Phosphorylation	7510703	ncbi_hprd
PLCG1	P19174	Q62077	Phospholipase	Cytosol	SRC	P12931	P05480	NA	Cytosol	Phosphorylation	7682059	SAVI
PLCG1	P19174	Q62077	Phospholipase	Cytosol	SRC	P12931	P05480	NA	Cytosol	Phosphorylation	8388373	SAVI
PLCG1	P19174	Q62077	Phospholipase	Cytosol	PDGFRB	P09619	P05622	NA	Membrane	Phosphorylation	2173144	ncbi_hprd
PLCG1	P19174	Q62077	Phospholipase	Cytosol	PDGFRB	P09619	P05622	NA	Membrane	Phosphorylation	2472219	SAVI
PLCG1	P19174	Q62077	Phospholipase	Cytosol	PDGFRB	P09619	P05622	NA	Membrane	Phosphorylation	7486683	DIP
PLCG1	P19174	Q62077	Phospholipase	Cytosol	PDGFRB	P09619	P05622	NA	Membrane	Phosphorylation	7592796	ncbi_hprd
PLCG1	P19174	Q62077	Phospholipase	Cytosol	PDGFRB	P09619	P05622	NA	Membrane	Phosphorylation	7689724	ncbi_hprd
PLCG1	P19174	Q62077	Phospholipase	Cytosol	PDGFRB	P09619	P05622	NA	Membrane	Phosphorylation	7876130	ncbi_hprd
PLCG1	P19174	Q62077	Phospholipase	Cytosol	PDGFRB	P09619	P05622	NA	Membrane	Phosphorylation	8388538	ncbi_hprd
PLCG1	P19174	Q62077	Phospholipase	Cytosol	PDGFRB	P09619	P05622	NA	Membrane	Phosphorylation	8443409	BIND
PLCG1	P19174	Q62077	Phospholipase	Cytosol	PDGFRB	P09619	P05622	NA	Membrane	Phosphorylation	8443409	ncbi_hprd
PLCG1	P19174	Q62077	Phospholipase	Cytosol	PDGFRB	P09619	P05622	NA	Membrane	Phosphorylation	8890167	ncbi_hprd
PLCG1	P19174	Q62077	Phospholipase	Cytosol	PDGFRB	P09619	P05622	NA	Membrane	Phosphorylation	10592173	kegg_mammalian
PLCG1	P19174	Q62077	Phospholipase	Cytosol	EGFR	P00533	Q01279	NA	Membrane	Phosphorylation	2173144	ncbi_hprd
PLCG1	P19174	Q62077	Phospholipase	Cytosol	EGFR	P00533	Q01279	NA	Membrane	Phosphorylation	2176151	ncbi_hprd
PLCG1	P19174	Q62077	Phospholipase	Cytosol	EGFR	P00533	Q01279	NA	Membrane	Phosphorylation	2472219	SAVI
PLCG1	P19174	Q62077	Phospholipase	Cytosol	EGFR	P00533	Q01279	NA	Membrane	Phosphorylation	9207933	BIND
PLCG1	P19174	Q62077	Phospholipase	Cytosol	EGFR	P00533	Q01279	NA	Membrane	Phosphorylation	9207933	ncbi_hprd
PLCG1	P19174	Q62077	Phospholipase	Cytosol	EGFR	P00533	Q01279	NA	Membrane	Phosphorylation	10592173	kegg_mammalian
PLCG1	P19174	Q62077	Phospholipase	Cytosol	EGFR	P00533	Q01279	NA	Membrane	Phosphorylation	16273093	ncbi_hprd
PLCG1	P08069	Q60751	Receptor	Cytosol	IGF1R	P19174	Q62077	Phospholipase	Cytosol	binding	10592173	kegg_mammalian
PLCG1	Q15303	Q61527	Adapter	Cytosol	ERBB4	P19174	Q62077	Phospholipase	Cytosol	binding	10592173	kegg_mammalian
PLCG2	P16885	NA	NA	NA	SHC1	P29353	P98083	NA	Cytosol	Binding	10623845	BIND
PLCG2	P16885	NA	NA	NA	SHC1	P29353	P98083	NA	Cytosol	Binding	10623845	ncbi_hprd
PLCG2	P16885	NA	NA	NA	PRKCG	P05129	P63318	NA	NA	binding	10592173	kegg_mammalian
PLCG2	P08069	Q60751	Receptor	Cytosol	IGF1R	P16885	NA	NA	NA	binding	10592173	kegg_mammalian
PLCG2	Q13480	Q9QYY0	Adapter	Cytosol	GAB1	P16885	NA	NA	NA	Binding	11507676	BIND
PLCG2	Q13480	Q9QYY0	Adapter	Cytosol	GAB1	P16885	NA	NA	NA	Binding	11507676	ncbi_hprd
PLCG2	Q9UQC2	Q9Z1S8	NA	NA	GAB2	P16885	NA	NA	NA	Binding	12135708	BIND
PLCG2	Q9UQC2	Q9Z1S8	NA	NA	GAB2	P16885	NA	NA	NA	Binding	12135708	ncbi_hprd
PLCG2	P16234	P26618	NA	NA	PDGFRA	P16885	NA	NA	NA	binding	10592173	kegg_mammalian
PLCG2	P09619	P05622	NA	Membrane	PDGFRB	P16885	NA	NA	NA	binding	10592173	kegg_mammalian
PLCG2	P04626	P70424	Receptor	Membrane	ERBB2	P16885	NA	NA	NA	binding	10592173	kegg_mammalian
PLCG2	Q15303	Q61527	Adapter	Cytosol	ERBB4	P16885	NA	NA	NA	binding	10592173	kegg_mammalian
PLCG2	P19174	Q62077	Phospholipase	Cytosol	PLCG1	P16885	NA	NA	NA	Binding	8885868	BIND
PLCG2	P19174	Q62077	Phospholipase	Cytosol	PLCG1	P16885	NA	NA	NA	Binding	8885868	ncbi_hprd
PRKCD	Q05655	P28867	NA	NA	PTK2B	Q14289	Q9QVP9	Kinase	Cytosol	Binding	11352632	BIND
PRKCD	Q05655	P28867	NA	NA	PTK2B	Q14289	Q9QVP9	Kinase	Cytosol	Binding	11352632	ncbi_hprd
PRKCD	Q05655	P28867	NA	NA	SHC1	P29353	P98083	NA	Cytosol	Binding	12024011	BIND
PRKCD	Q05655	P28867	NA	NA	SHC1	P29353	P98083	NA	Cytosol	Binding	12024011	ncbi_hprd
PRKCD	Q05655	P28867	NA	NA	IRS1	P35568	P35569	Adapter	Cytosol	phosphorylation	10592173	kegg_mammalian
PRKCD	Q05655	P28867	NA	NA	IRS1	P35568	P35569	Adapter	Cytosol	phosphorylation	12031982	BIND
PRKCD	Q05655	P28867	NA	NA	IRS1	P35568	P35569	Adapter	Cytosol	phosphorylation	12031982	ncbi_hprd
PRKCD	Q05655	P28867	NA	NA	RAF1	P04049	Q99N57	NA	Cytosol	phosphorylation	10592173	kegg_mammalian
PRKCD	O15530	Q9Z2A0	NA	Cytosol	PDPK1	Q05655	P28867	NA	NA	Binding	11781095	BIND
PRKCD	O15530	Q9Z2A0	NA	Cytosol	PDPK1	Q05655	P28867	NA	NA	Binding	11781095	ncbi_hprd
PRKCG	P05129	P63318	NA	NA	RAF1	P04049	Q99N57	NA	Cytosol	phosphorylation	10592173	kegg_mammalian
PRKCG	P19174	Q62077	Phospholipase	Cytosol	PLCG1	P05129	P63318	NA	NA	binding	10592173	kegg_mammalian
PRKCG	P16885	NA	NA	NA	PLCG2	P05129	P63318	NA	NA	binding	10592173	kegg_mammalian
PTEN	P60484	O08586	NA	Cytosol	AKT1	P31749	P31750	NA	Cytosol	binding	10592173	kegg_mammalian
PTK2B	Q14289	Q9QVP9	Kinase	Cytosol	SHC1	P29353	P98083	NA	Cytosol	Binding	7544443	BIND
PTK2B	Q14289	Q9QVP9	Kinase	Cytosol	SHC1	P29353	P98083	NA	Cytosol	Binding	7544443	ncbi_hprd
PTK2B	Q14289	Q9QVP9	Kinase	Cytosol	SRC	P12931	P05480	NA	Cytosol	Binding	8849729	BIND
PTK2B	Q14289	Q9QVP9	Kinase	Cytosol	SRC	P12931	P05480	NA	Cytosol	Binding	8849729	SAVI
PTK2B	Q14289	Q9QVP9	Kinase	Cytosol	SRC	P12931	P05480	NA	Cytosol	Binding	8849729	ncbi_hprd
PTK2B	Q14289	Q9QVP9	Kinase	Cytosol	SRC	P12931	P05480	NA	Cytosol	Binding	9560226	SAVI
PTK2B	Q14289	Q9QVP9	Kinase	Cytosol	SRC	P12931	P05480	NA	Cytosol	Binding	10329689	SAVI
PTK2B	Q14289	Q9QVP9	Kinase	Cytosol	SRC	P12931	P05480	NA	Cytosol	Binding	10777553	BIND
PTK2B	Q14289	Q9QVP9	Kinase	Cytosol	SRC	P12931	P05480	NA	Cytosol	Binding	10777553	ncbi_hprd
PTK2B	Q14289	Q9QVP9	Kinase	Cytosol	SRC	P12931	P05480	NA	Cytosol	Binding	11274221	SAVI
PTK2B	Q14289	Q9QVP9	Kinase	Cytosol	PTPN11	Q06124	P35235	NA	Cytosol	Binding	10880513	BIND
PTK2B	Q14289	Q9QVP9	Kinase	Cytosol	PTPN11	Q06124	P35235	NA	Cytosol	Binding	10880513	ncbi_hprd
PTK2B	Q14289	Q9QVP9	Kinase	Cytosol	ERBB2	P04626	P70424	Receptor	Membrane	Binding	10713673	BIND
PTK2B	Q14289	Q9QVP9	Kinase	Cytosol	ERBB2	P04626	P70424	Receptor	Membrane	Binding	10713673	ncbi_hprd
PTK2B	Q14289	Q9QVP9	Kinase	Cytosol	CRK	P46108	Q64010	NA	Cytosol	Binding	10329689	BIND
PTK2B	Q14289	Q9QVP9	Kinase	Cytosol	CRK	P46108	Q64010	NA	Cytosol	Binding	10329689	ncbi_hprd
PTK2B	P43405	P48025	NA	Cytosol	SYK	Q14289	Q9QVP9	Kinase	Cytosol	Binding	10747947	BIND
PTK2B	P43405	P48025	NA	Cytosol	SYK	Q14289	Q9QVP9	Kinase	Cytosol	Binding	10747947	ncbi_hprd
PTK2B	P23458	P52332	NA	NA	JAK1	Q14289	Q9QVP9	Kinase	Cytosol	Binding	10702271	BIND
PTK2B	P23458	P52332	NA	NA	JAK1	Q14289	Q9QVP9	Kinase	Cytosol	Binding	10702271	ncbi_hprd
PTK2B	Q05655	P28867	NA	NA	PRKCD	Q14289	Q9QVP9	Kinase	Cytosol	Binding	11352632	BIND
PTK2B	Q05655	P28867	NA	NA	PRKCD	Q14289	Q9QVP9	Kinase	Cytosol	Binding	11352632	ncbi_hprd
PTK2B	P43403	P43404	NA	Cytosol	ZAP70	Q14289	Q9QVP9	Kinase	Cytosol	Binding	10867021	BIND
PTK2B	P43403	P43404	NA	Cytosol	ZAP70	Q14289	Q9QVP9	Kinase	Cytosol	Binding	10867021	ncbi_hprd
PTPN11	Q06124	P35235	NA	Cytosol	GAB2	Q9UQC2	Q9Z1S8	NA	NA	binding	10068651	BIND
PTPN11	Q06124	P35235	NA	Cytosol	GAB2	Q9UQC2	Q9Z1S8	NA	NA	binding	10068651	ncbi_hprd
PTPN11	Q06124	P35235	NA	Cytosol	GAB2	Q9UQC2	Q9Z1S8	NA	NA	binding	10592173	kegg_mammalian
PTPN11	Q06124	P35235	NA	Cytosol	GAB2	Q9UQC2	Q9Z1S8	NA	NA	binding	11287610	BIND
PTPN11	Q06124	P35235	NA	Cytosol	GAB2	Q9UQC2	Q9Z1S8	NA	NA	binding	11287610	ncbi_hprd
PTPN11	Q06124	P35235	NA	Cytosol	MET	P08581	P16056	NA	NA	Binding	8662733	BIND
PTPN11	Q06124	P35235	NA	Cytosol	MET	P08581	P16056	NA	NA	Binding	8662733	ncbi_hprd
PTPN11	Q06124	P35235	NA	Cytosol	CRKL	P46109	P47941	NA	NA	Binding	9344843	BIND
PTPN11	Q06124	P35235	NA	Cytosol	CRKL	P46109	P47941	NA	NA	Binding	9344843	ncbi_hprd
PTPN11	Q06124	P35235	NA	Cytosol	IGF1R	P08069	Q60751	Receptor	Cytosol	Binding	7642582	BIND
PTPN11	Q06124	P35235	NA	Cytosol	IGF1R	P08069	Q60751	Receptor	Cytosol	Binding	7642582	ncbi_hprd
PTPN11	Q06124	P35235	NA	Cytosol	IGF1R	P08069	Q60751	Receptor	Cytosol	Binding	8895367	DIP
PTPN11	Q06124	P35235	NA	Cytosol	IRS1	P35568	P35569	Adapter	Cytosol	Binding	8505282	BIND
PTPN11	Q06124	P35235	NA	Cytosol	IRS1	P35568	P35569	Adapter	Cytosol	Binding	8505282	ncbi_hprd
PTPN11	Q06124	P35235	NA	Cytosol	IRS1	P35568	P35569	Adapter	Cytosol	Binding	9756938	BIND
PTPN11	Q06124	P35235	NA	Cytosol	IRS1	P35568	P35569	Adapter	Cytosol	Binding	9756938	ncbi_hprd
PTPN11	Q06124	P35235	NA	Cytosol	SHC1	P29353	P98083	NA	Cytosol	NA	10650943	BIND
PTPN11	Q06124	P35235	NA	Cytosol	SHC1	P29353	P98083	NA	Cytosol	NA	10650943	ncbi_hprd
PTPN11	Q06124	P35235	NA	Cytosol	SHC1	P29353	P98083	NA	Cytosol	NA	16189514	BIND
PTPN11	Q06124	P35235	NA	Cytosol	SHC1	P29353	P98083	NA	Cytosol	NA	16189514	vidal
PTPN11	Q06124	P35235	NA	Cytosol	SHC1	P29353	P98083	NA	Cytosol	NA	16189514	ncbi_hprd
PTPN11	Q06124	P35235	NA	Cytosol	PDGFRB	P09619	P05622	NA	Membrane	NA	7688466	SAVI
PTPN11	Q06124	P35235	NA	Cytosol	PDGFRB	P09619	P05622	NA	Membrane	NA	7691811	BIND
PTPN11	Q06124	P35235	NA	Cytosol	PDGFRB	P09619	P05622	NA	Membrane	NA	8226787	SAVI
PTPN11	Q06124	P35235	NA	Cytosol	PDGFRB	P09619	P05622	NA	Membrane	NA	16189514	BIND
PTPN11	Q06124	P35235	NA	Cytosol	PDGFRB	P09619	P05622	NA	Membrane	NA	16189514	vidal
PTPN11	Q06124	P35235	NA	Cytosol	STAT5A	P42229	P42230	NA	Nucleus	NA	10617656	ncbi_hprd
PTPN11	Q06124	P35235	NA	Cytosol	STAT5A	P42229	P42230	NA	Nucleus	NA	12060651	BIND
PTPN11	Q06124	P35235	NA	Cytosol	STAT5A	P42229	P42230	NA	Nucleus	NA	12060651	ncbi_hprd
PTPN11	Q06124	P35235	NA	Cytosol	STAT5A	P42229	P42230	NA	Nucleus	NA	16189514	BIND
PTPN11	Q06124	P35235	NA	Cytosol	STAT5A	P42229	P42230	NA	Nucleus	NA	16189514	vidal
PTPN11	Q06124	P35235	NA	Cytosol	STAT5A	P42229	P42230	NA	Nucleus	NA	16189514	ncbi_hprd
PTPN11	Q06124	P35235	NA	Cytosol	STAT3	P40763	P42227	NA	NA	NA	11594781	BIND
PTPN11	Q06124	P35235	NA	Cytosol	STAT3	P40763	P42227	NA	NA	NA	11594781	ncbi_hprd
PTPN11	Q06124	P35235	NA	Cytosol	STAT3	P40763	P42227	NA	NA	NA	16189514	BIND
PTPN11	Q06124	P35235	NA	Cytosol	STAT3	P40763	P42227	NA	NA	NA	16189514	vidal
PTPN11	Q06124	P35235	NA	Cytosol	STAT3	P40763	P42227	NA	NA	NA	16189514	ncbi_hprd
PTPN11	P00533	Q01279	NA	Membrane	EGFR	Q06124	P35235	NA	Cytosol	Binding	7673163	BIND
PTPN11	P00533	Q01279	NA	Membrane	EGFR	Q06124	P35235	NA	Cytosol	Binding	7673163	ncbi_hprd
PTPN11	P00533	Q01279	NA	Membrane	EGFR	Q06124	P35235	NA	Cytosol	Binding	16273093	ncbi_hprd
PTPN11	P00533	Q01279	NA	Membrane	EGFR	Q06124	P35235	NA	Cytosol	Binding	16729043	ncbi_hprd
PTPN11	P10721	P05532	Adapter	Cytosol	KIT	Q06124	P35235	NA	Cytosol	Binding	7523381	BIND
PTPN11	P10721	P05532	Adapter	Cytosol	KIT	Q06124	P35235	NA	Cytosol	Binding	7523381	ncbi_hprd
PTPN11	P10721	P05532	Adapter	Cytosol	KIT	Q06124	P35235	NA	Cytosol	Binding	9528781	BIND
PTPN11	P10721	P05532	Adapter	Cytosol	KIT	Q06124	P35235	NA	Cytosol	Binding	9528781	ncbi_hprd
PTPN11	Q14289	Q9QVP9	Kinase	Cytosol	PTK2B	Q06124	P35235	NA	Cytosol	Binding	10880513	BIND
PTPN11	Q14289	Q9QVP9	Kinase	Cytosol	PTK2B	Q06124	P35235	NA	Cytosol	Binding	10880513	ncbi_hprd
PTPN11	Q13480	Q9QYY0	Adapter	Cytosol	GAB1	Q06124	P35235	NA	Cytosol	bindng	7708014	IntAct
PTPN11	Q13480	Q9QYY0	Adapter	Cytosol	GAB1	Q06124	P35235	NA	Cytosol	bindng	7940758	IntAct
PTPN11	Q13480	Q9QYY0	Adapter	Cytosol	GAB1	Q06124	P35235	NA	Cytosol	bindng	9658397	IntAct
PTPN11	Q13480	Q9QYY0	Adapter	Cytosol	GAB1	Q06124	P35235	NA	Cytosol	bindng	10592173	kegg_mammalian
PTPN11	Q13480	Q9QYY0	Adapter	Cytosol	GAB1	Q06124	P35235	NA	Cytosol	bindng	10967325	IntAct
PTPN11	Q13480	Q9QYY0	Adapter	Cytosol	GAB1	Q06124	P35235	NA	Cytosol	bindng	11125103	IntAct
PTPN11	Q13480	Q9QYY0	Adapter	Cytosol	GAB1	Q06124	P35235	NA	Cytosol	bindng	11940581	BIND
PTPN11	Q13480	Q9QYY0	Adapter	Cytosol	GAB1	Q06124	P35235	NA	Cytosol	bindng	11940581	ncbi_hprd
PTPN11	Q13480	Q9QYY0	Adapter	Cytosol	GAB1	Q06124	P35235	NA	Cytosol	bindng	12582165	ncbi_hprd
PTPN11	Q13480	Q9QYY0	Adapter	Cytosol	GAB1	Q06124	P35235	NA	Cytosol	bindng	12634794	IntAct
PTPN11	Q13480	Q9QYY0	Adapter	Cytosol	GAB1	Q06124	P35235	NA	Cytosol	bindng	14665621	ncbi_hprd
PTPN11	Q13480	Q9QYY0	Adapter	Cytosol	GAB1	Q06124	P35235	NA	Cytosol	bindng	14701753	SAVI
PTPN11	Q13480	Q9QYY0	Adapter	Cytosol	GAB1	Q06124	P35235	NA	Cytosol	bindng	14701753	ncbi_hprd
PTPN11	P16234	P26618	NA	NA	PDGFRA	Q06124	P35235	NA	Cytosol	NA	8943348	BIND
PTPN11	P16234	P26618	NA	NA	PDGFRA	Q06124	P35235	NA	Cytosol	NA	16189514	BIND
PTPN11	P16234	P26618	NA	NA	PDGFRA	Q06124	P35235	NA	Cytosol	NA	16189514	vidal
RAF1	P04049	Q99N57	NA	Cytosol	SRC	P12931	P05480	NA	Cytosol	NA	7517401	BIND
RAF1	P04049	Q99N57	NA	Cytosol	SRC	P12931	P05480	NA	Cytosol	NA	7517401	ncbi_hprd
RAF1	P04049	Q99N57	NA	Cytosol	SRC	P12931	P05480	NA	Cytosol	NA	16189514	BIND
RAF1	P04049	Q99N57	NA	Cytosol	SRC	P12931	P05480	NA	Cytosol	NA	16189514	vidal
RAF1	P04049	Q99N57	NA	Cytosol	SRC	P12931	P05480	NA	Cytosol	NA	16189514	ncbi_hprd
RAF1	P23458	P52332	NA	NA	JAK1	P04049	Q99N57	NA	Cytosol	Binding	9446616	BIND
RAF1	P23458	P52332	NA	NA	JAK1	P04049	Q99N57	NA	Cytosol	Binding	9446616	ncbi_hprd
RAF1	P36507	Q63932	NA	NA	MAP2K2	P04049	Q99N57	NA	Cytosol	NA	10592173	kegg_mammalian
RAF1	P36507	Q63932	NA	NA	MAP2K2	P04049	Q99N57	NA	Cytosol	NA	16189514	BIND
RAF1	P36507	Q63932	NA	NA	MAP2K2	P04049	Q99N57	NA	Cytosol	NA	16189514	vidal
RAF1	P09619	P05622	NA	Membrane	PDGFRB	P04049	Q99N57	NA	Cytosol	NA	2475255	BIND
RAF1	P09619	P05622	NA	Membrane	PDGFRB	P04049	Q99N57	NA	Cytosol	NA	2475255	ncbi_hprd
RAF1	P09619	P05622	NA	Membrane	PDGFRB	P04049	Q99N57	NA	Cytosol	NA	16189514	BIND
RAF1	P09619	P05622	NA	Membrane	PDGFRB	P04049	Q99N57	NA	Cytosol	NA	16189514	vidal
RAF1	P09619	P05622	NA	Membrane	PDGFRB	P04049	Q99N57	NA	Cytosol	NA	16189514	ncbi_hprd
RPS6KA1	Q15418	P18653	NA	Cytosol	CREB1	P16220	Q01147	NA	Nucleus	phosphorylation	8688081	SAVI
RPS6KA1	P42345	Q9JLN9	Kinase	Cytosol	FRAP1	Q15418	P18653	NA	Cytosol	Binding	11914378	MINT
RPS6KB1	P23443	Q8BSK8	Kinase	Cytosol	RPS6	P62753	P62754	NA	NA	phosphorylation	10592173	kegg_mammalian
RPS6KB1	P23443	Q8BSK8	Kinase	Cytosol	RPS6	P62753	P62754	NA	NA	phosphorylation	11438723	MINT
RPS6KB1	P23443	Q8BSK8	Kinase	Cytosol	RPS6	P62753	P62754	NA	NA	phosphorylation	11438723	ncbi_hprd
RPS6KB1	P23443	Q8BSK8	Kinase	Cytosol	RPS6	P62753	P62754	NA	NA	phosphorylation	12586835	ncbi_hprd
RPS6KB1	P31749	P31750	NA	Cytosol	AKT1	P23443	Q8BSK8	Kinase	Cytosol	Binding	11438723	MINT
RPS6KB1	P31749	P31750	NA	Cytosol	AKT1	P23443	Q8BSK8	Kinase	Cytosol	Binding	11438723	ncbi_hprd
SHC1	P29353	P98083	NA	Cytosol	CRKL	P46109	P47941	NA	NA	Binding	9344843	BIND
SHC1	P29353	P98083	NA	Cytosol	CRKL	P46109	P47941	NA	NA	Binding	9344843	ncbi_hprd
SHC1	P29353	P98083	NA	Cytosol	IRS1	P35568	P35569	Adapter	Cytosol	Binding	7499194	BIND
SHC1	P29353	P98083	NA	Cytosol	IRS1	P35568	P35569	Adapter	Cytosol	Binding	7499194	ncbi_hprd
SHC1	P29353	P98083	NA	Cytosol	IRS1	P35568	P35569	Adapter	Cytosol	Binding	9202037	ncbi_hprd
SHC1	P29353	P98083	NA	Cytosol	GAB2	Q9UQC2	Q9Z1S8	NA	NA	Binding	10704825	MINT
SHC1	P29353	P98083	NA	Cytosol	IGF1R	P08069	Q60751	Receptor	Cytosol	bindng	7541045	ncbi_hprd
SHC1	P29353	P98083	NA	Cytosol	IGF1R	P08069	Q60751	Receptor	Cytosol	bindng	7940758	IntAct
SHC1	P29353	P98083	NA	Cytosol	IGF1R	P08069	Q60751	Receptor	Cytosol	bindng	8776723	BIND
SHC1	P29353	P98083	NA	Cytosol	IGF1R	P08069	Q60751	Receptor	Cytosol	bindng	8776723	SAVI
SHC1	P29353	P98083	NA	Cytosol	IGF1R	P08069	Q60751	Receptor	Cytosol	bindng	8776723	ncbi_hprd
SHC1	P29353	P98083	NA	Cytosol	IGF1R	P08069	Q60751	Receptor	Cytosol	bindng	10592173	kegg_mammalian
SHC1	P29353	P98083	NA	Cytosol	IGF1R	P08069	Q60751	Receptor	Cytosol	bindng	10967325	IntAct
SHC1	P29353	P98083	NA	Cytosol	IGF1R	P08069	Q60751	Receptor	Cytosol	bindng	12634794	IntAct
SHC1	P29353	P98083	NA	Cytosol	IGF1R	P08069	Q60751	Receptor	Cytosol	bindng	15629149	IntAct
SHC1	P29353	P98083	NA	Cytosol	SRC	P12931	P05480	NA	Cytosol	Phosphorylation	1409579	SAVI
SHC1	P29353	P98083	NA	Cytosol	SRC	P12931	P05480	NA	Cytosol	Phosphorylation	7516469	MINT
SHC1	P29353	P98083	NA	Cytosol	SRC	P12931	P05480	NA	Cytosol	Phosphorylation	10329689	SAVI
SHC1	P29353	P98083	NA	Cytosol	SRC	P12931	P05480	NA	Cytosol	Phosphorylation	16189514	BIND
SHC1	P29353	P98083	NA	Cytosol	SRC	P12931	P05480	NA	Cytosol	Phosphorylation	16189514	vidal
SHC1	P43405	P48025	NA	Cytosol	SYK	P29353	P98083	NA	Cytosol	binding	10592173	kegg_mammalian
SHC1	P28482	P63085	Kinase	Cytosol	MAPK1	P29353	P98083	NA	Cytosol	Binding	10996427	BIND
SHC1	P28482	P63085	Kinase	Cytosol	MAPK1	P29353	P98083	NA	Cytosol	Binding	10996427	ncbi_hprd
SHC1	P46108	Q64010	NA	Cytosol	CRK	P29353	P98083	NA	Cytosol	Binding	8662907	SAVI
SHC1	P08581	P16056	NA	NA	MET	P29353	P98083	NA	Cytosol	binding	7731718	BIND
SHC1	P08581	P16056	NA	NA	MET	P29353	P98083	NA	Cytosol	binding	7731718	ncbi_hprd
SHC1	P08581	P16056	NA	NA	MET	P29353	P98083	NA	Cytosol	binding	10592173	kegg_mammalian
SHC1	Q05655	P28867	NA	NA	PRKCD	P29353	P98083	NA	Cytosol	Binding	12024011	BIND
SHC1	Q05655	P28867	NA	NA	PRKCD	P29353	P98083	NA	Cytosol	Binding	12024011	ncbi_hprd
SHC1	Q14289	Q9QVP9	Kinase	Cytosol	PTK2B	P29353	P98083	NA	Cytosol	Binding	7544443	BIND
SHC1	Q14289	Q9QVP9	Kinase	Cytosol	PTK2B	P29353	P98083	NA	Cytosol	Binding	7544443	ncbi_hprd
SHC1	P16234	P26618	NA	NA	PDGFRA	P29353	P98083	NA	Cytosol	binding	10592173	kegg_mammalian
SHC1	O00459	O08908	NA	NA	PIK3R2	P29353	P98083	NA	Cytosol	Binding	8662998	BIND
SHC1	O00459	O08908	NA	NA	PIK3R2	P29353	P98083	NA	Cytosol	Binding	8662998	ncbi_hprd
SHC1	P04626	P70424	Receptor	Membrane	ERBB2	P29353	P98083	NA	Cytosol	binding	8026468	SAVI
SHC1	P04626	P70424	Receptor	Membrane	ERBB2	P29353	P98083	NA	Cytosol	binding	9710588	BIND
SHC1	P04626	P70424	Receptor	Membrane	ERBB2	P29353	P98083	NA	Cytosol	binding	9710588	ncbi_hprd
SHC1	P04626	P70424	Receptor	Membrane	ERBB2	P29353	P98083	NA	Cytosol	binding	10085134	ncbi_hprd
SHC1	P04626	P70424	Receptor	Membrane	ERBB2	P29353	P98083	NA	Cytosol	binding	10592173	kegg_mammalian
SHC1	P04626	P70424	Receptor	Membrane	ERBB2	P29353	P98083	NA	Cytosol	binding	16273093	ncbi_hprd
SHC1	P04626	P70424	Receptor	Membrane	ERBB2	P29353	P98083	NA	Cytosol	binding	16729043	ncbi_hprd
SHC1	P16885	NA	NA	NA	PLCG2	P29353	P98083	NA	Cytosol	Binding	10623845	BIND
SHC1	P16885	NA	NA	NA	PLCG2	P29353	P98083	NA	Cytosol	Binding	10623845	ncbi_hprd
SHC1	P00533	Q01279	NA	Membrane	EGFR	P29353	P98083	NA	Cytosol	bindng	1623525	ncbi_hprd
SHC1	P00533	Q01279	NA	Membrane	EGFR	P29353	P98083	NA	Cytosol	bindng	7681824	SAVI
SHC1	P00533	Q01279	NA	Membrane	EGFR	P29353	P98083	NA	Cytosol	bindng	7708014	IntAct
SHC1	P00533	Q01279	NA	Membrane	EGFR	P29353	P98083	NA	Cytosol	bindng	7798194	IntAct
SHC1	P00533	Q01279	NA	Membrane	EGFR	P29353	P98083	NA	Cytosol	bindng	8577769	ncbi_hprd
SHC1	P00533	Q01279	NA	Membrane	EGFR	P29353	P98083	NA	Cytosol	bindng	8610109	ncbi_hprd
SHC1	P00533	Q01279	NA	Membrane	EGFR	P29353	P98083	NA	Cytosol	bindng	8662998	MINT
SHC1	P00533	Q01279	NA	Membrane	EGFR	P29353	P98083	NA	Cytosol	bindng	8808684	SAVI
SHC1	P00533	Q01279	NA	Membrane	EGFR	P29353	P98083	NA	Cytosol	bindng	8887653	IntAct
SHC1	P00533	Q01279	NA	Membrane	EGFR	P29353	P98083	NA	Cytosol	bindng	8887653	ncbi_hprd
SHC1	P00533	Q01279	NA	Membrane	EGFR	P29353	P98083	NA	Cytosol	bindng	8943228	ncbi_hprd
SHC1	P00533	Q01279	NA	Membrane	EGFR	P29353	P98083	NA	Cytosol	bindng	9544989	BIND
SHC1	P00533	Q01279	NA	Membrane	EGFR	P29353	P98083	NA	Cytosol	bindng	9544989	ncbi_hprd
SHC1	P00533	Q01279	NA	Membrane	EGFR	P29353	P98083	NA	Cytosol	bindng	10592173	kegg_mammalian
SHC1	P00533	Q01279	NA	Membrane	EGFR	P29353	P98083	NA	Cytosol	bindng	12577067	BIND
SHC1	P00533	Q01279	NA	Membrane	EGFR	P29353	P98083	NA	Cytosol	bindng	16273093	ncbi_hprd
SHC1	P00533	Q01279	NA	Membrane	EGFR	P29353	P98083	NA	Cytosol	bindng	16729043	ncbi_hprd
SHC1	Q06124	P35235	NA	Cytosol	PTPN11	P29353	P98083	NA	Cytosol	NA	10650943	BIND
SHC1	Q06124	P35235	NA	Cytosol	PTPN11	P29353	P98083	NA	Cytosol	NA	10650943	ncbi_hprd
SHC1	Q06124	P35235	NA	Cytosol	PTPN11	P29353	P98083	NA	Cytosol	NA	16189514	BIND
SHC1	Q06124	P35235	NA	Cytosol	PTPN11	P29353	P98083	NA	Cytosol	NA	16189514	vidal
SHC1	Q06124	P35235	NA	Cytosol	PTPN11	P29353	P98083	NA	Cytosol	NA	16189514	ncbi_hprd
SHC1	P11362	P16092	NA	NA	FGFR1	P29353	P98083	NA	Cytosol	NA	7514169	BIND
SHC1	P11362	P16092	NA	NA	FGFR1	P29353	P98083	NA	Cytosol	NA	7514169	ncbi_hprd
SHC1	P11362	P16092	NA	NA	FGFR1	P29353	P98083	NA	Cytosol	NA	16189514	BIND
SHC1	P11362	P16092	NA	NA	FGFR1	P29353	P98083	NA	Cytosol	NA	16189514	vidal
SHC1	P11362	P16092	NA	NA	FGFR1	P29353	P98083	NA	Cytosol	NA	16189514	ncbi_hprd
SHC1	P09619	P05622	NA	Membrane	PDGFRB	P29353	P98083	NA	Cytosol	NA	8195171	BIND
SHC1	P09619	P05622	NA	Membrane	PDGFRB	P29353	P98083	NA	Cytosol	NA	8195171	ncbi_hprd
SHC1	P09619	P05622	NA	Membrane	PDGFRB	P29353	P98083	NA	Cytosol	NA	8890167	ncbi_hprd
SHC1	P09619	P05622	NA	Membrane	PDGFRB	P29353	P98083	NA	Cytosol	NA	10592173	kegg_mammalian
SHC1	P09619	P05622	NA	Membrane	PDGFRB	P29353	P98083	NA	Cytosol	NA	16189514	BIND
SHC1	P09619	P05622	NA	Membrane	PDGFRB	P29353	P98083	NA	Cytosol	NA	16189514	vidal
SHC1	P09619	P05622	NA	Membrane	PDGFRB	P29353	P98083	NA	Cytosol	NA	16189514	ncbi_hprd
SHC1	P43403	P43404	NA	Cytosol	ZAP70	P29353	P98083	NA	Cytosol	NA	8761298	BIND
SHC1	P43403	P43404	NA	Cytosol	ZAP70	P29353	P98083	NA	Cytosol	NA	8761298	ncbi_hprd
SHC1	P43403	P43404	NA	Cytosol	ZAP70	P29353	P98083	NA	Cytosol	NA	9685404	BIND
SHC1	P43403	P43404	NA	Cytosol	ZAP70	P29353	P98083	NA	Cytosol	NA	9685404	ncbi_hprd
SHC1	P43403	P43404	NA	Cytosol	ZAP70	P29353	P98083	NA	Cytosol	NA	10592173	kegg_mammalian
SHC1	P43403	P43404	NA	Cytosol	ZAP70	P29353	P98083	NA	Cytosol	NA	16189514	BIND
SHC1	P43403	P43404	NA	Cytosol	ZAP70	P29353	P98083	NA	Cytosol	NA	16189514	vidal
SHC1	P43403	P43404	NA	Cytosol	ZAP70	P29353	P98083	NA	Cytosol	NA	16189514	ncbi_hprd
SRC	P12931	P05480	NA	Cytosol	PIK3R2	O00459	O08908	NA	NA	binding	10592173	kegg_mammalian
SRC	P12931	P05480	NA	Cytosol	PIK3R3	Q92569	Q64143	NA	NA	binding	10592173	kegg_mammalian
SRC	P12931	P05480	NA	Cytosol	STAT3	P40763	P42227	NA	NA	NA	8657134	BIND
SRC	P12931	P05480	NA	Cytosol	STAT3	P40763	P42227	NA	NA	NA	8657134	ncbi_hprd
SRC	P12931	P05480	NA	Cytosol	STAT3	P40763	P42227	NA	NA	NA	16189514	BIND
SRC	P12931	P05480	NA	Cytosol	STAT3	P40763	P42227	NA	NA	NA	16189514	vidal
SRC	P12931	P05480	NA	Cytosol	STAT3	P40763	P42227	NA	NA	NA	16189514	ncbi_hprd
SRC	P12931	P05480	NA	Cytosol	STAT1	P42224	P42225	NA	Nucleus	NA	9344858	BIND
SRC	P12931	P05480	NA	Cytosol	STAT1	P42224	P42225	NA	Nucleus	NA	9344858	ncbi_hprd
SRC	P12931	P05480	NA	Cytosol	STAT1	P42224	P42225	NA	Nucleus	NA	16189514	BIND
SRC	P12931	P05480	NA	Cytosol	STAT1	P42224	P42225	NA	Nucleus	NA	16189514	vidal
SRC	P12931	P05480	NA	Cytosol	STAT1	P42224	P42225	NA	Nucleus	NA	16189514	ncbi_hprd
SRC	P00533	Q01279	NA	Membrane	EGFR	P12931	P05480	NA	Cytosol	binding	10592173	kegg_mammalian
SRC	P00533	Q01279	NA	Membrane	EGFR	P12931	P05480	NA	Cytosol	binding	10971656	BIND
SRC	P00533	Q01279	NA	Membrane	EGFR	P12931	P05480	NA	Cytosol	binding	10971656	ncbi_hprd
SRC	P08581	P16056	NA	NA	MET	P12931	P05480	NA	Cytosol	Binding	9837958	BIND
SRC	P08581	P16056	NA	NA	MET	P12931	P05480	NA	Cytosol	Binding	9837958	ncbi_hprd
SRC	Q9UQC2	Q9Z1S8	NA	NA	GAB2	P12931	P05480	NA	Cytosol	Binding	10391903	BIND
SRC	Q9UQC2	Q9Z1S8	NA	NA	GAB2	P12931	P05480	NA	Cytosol	Binding	10391903	ncbi_hprd
SRC	Q14289	Q9QVP9	Kinase	Cytosol	PTK2B	P12931	P05480	NA	Cytosol	Binding	8849729	BIND
SRC	Q14289	Q9QVP9	Kinase	Cytosol	PTK2B	P12931	P05480	NA	Cytosol	Binding	8849729	SAVI
SRC	Q14289	Q9QVP9	Kinase	Cytosol	PTK2B	P12931	P05480	NA	Cytosol	Binding	8849729	ncbi_hprd
SRC	Q14289	Q9QVP9	Kinase	Cytosol	PTK2B	P12931	P05480	NA	Cytosol	Binding	9560226	SAVI
SRC	Q14289	Q9QVP9	Kinase	Cytosol	PTK2B	P12931	P05480	NA	Cytosol	Binding	10329689	SAVI
SRC	Q14289	Q9QVP9	Kinase	Cytosol	PTK2B	P12931	P05480	NA	Cytosol	Binding	10777553	BIND
SRC	Q14289	Q9QVP9	Kinase	Cytosol	PTK2B	P12931	P05480	NA	Cytosol	Binding	10777553	ncbi_hprd
SRC	Q14289	Q9QVP9	Kinase	Cytosol	PTK2B	P12931	P05480	NA	Cytosol	Binding	11274221	SAVI
SRC	P16234	P26618	NA	NA	PDGFRA	P12931	P05480	NA	Cytosol	binding	10592173	kegg_mammalian
SRC	Q12778	Q9R1E0	TF	Nucleus	FOXO1A	P12931	P05480	NA	Cytosol	Binding	10973497	BIND
SRC	P04626	P70424	Receptor	Membrane	ERBB2	P12931	P05480	NA	Cytosol	Binding	7542762	BIND
SRC	P04626	P70424	Receptor	Membrane	ERBB2	P12931	P05480	NA	Cytosol	Binding	7542762	ncbi_hprd
SRC	P04626	P70424	Receptor	Membrane	ERBB2	P12931	P05480	NA	Cytosol	Binding	15788656	ncbi_hprd
SRC	P04049	Q99N57	NA	Cytosol	RAF1	P12931	P05480	NA	Cytosol	NA	7517401	BIND
SRC	P04049	Q99N57	NA	Cytosol	RAF1	P12931	P05480	NA	Cytosol	NA	7517401	ncbi_hprd
SRC	P04049	Q99N57	NA	Cytosol	RAF1	P12931	P05480	NA	Cytosol	NA	16189514	BIND
SRC	P04049	Q99N57	NA	Cytosol	RAF1	P12931	P05480	NA	Cytosol	NA	16189514	vidal
SRC	P04049	Q99N57	NA	Cytosol	RAF1	P12931	P05480	NA	Cytosol	NA	16189514	ncbi_hprd
SRC	P42229	P42230	NA	Nucleus	STAT5A	P12931	P05480	NA	Cytosol	NA	10358079	BIND
SRC	P42229	P42230	NA	Nucleus	STAT5A	P12931	P05480	NA	Cytosol	NA	10358079	ncbi_hprd
SRC	P42229	P42230	NA	Nucleus	STAT5A	P12931	P05480	NA	Cytosol	NA	16189514	BIND
SRC	P42229	P42230	NA	Nucleus	STAT5A	P12931	P05480	NA	Cytosol	NA	16189514	vidal
SRC	P42229	P42230	NA	Nucleus	STAT5A	P12931	P05480	NA	Cytosol	NA	16189514	ncbi_hprd
SRC	P09619	P05622	NA	Membrane	PDGFRB	P12931	P05480	NA	Cytosol	NA	10592173	kegg_mammalian
SRC	P09619	P05622	NA	Membrane	PDGFRB	P12931	P05480	NA	Cytosol	NA	16189514	BIND
SRC	P09619	P05622	NA	Membrane	PDGFRB	P12931	P05480	NA	Cytosol	NA	16189514	vidal
STAT1	P00533	Q01279	NA	Membrane	EGFR	P42224	P42225	NA	Nucleus	Binding	12070153	BIND
STAT1	P00533	Q01279	NA	Membrane	EGFR	P42224	P42225	NA	Nucleus	Binding	12070153	ncbi_hprd
STAT1	P10721	P05532	Adapter	Cytosol	KIT	P42224	P42225	NA	Nucleus	Binding	9355737	BIND
STAT1	P10721	P05532	Adapter	Cytosol	KIT	P42224	P42225	NA	Nucleus	Binding	9355737	ncbi_hprd
STAT1	P12931	P05480	NA	Cytosol	SRC	P42224	P42225	NA	Nucleus	NA	9344858	BIND
STAT1	P12931	P05480	NA	Cytosol	SRC	P42224	P42225	NA	Nucleus	NA	9344858	ncbi_hprd
STAT1	P12931	P05480	NA	Cytosol	SRC	P42224	P42225	NA	Nucleus	NA	16189514	BIND
STAT1	P12931	P05480	NA	Cytosol	SRC	P42224	P42225	NA	Nucleus	NA	16189514	vidal
STAT1	P12931	P05480	NA	Cytosol	SRC	P42224	P42225	NA	Nucleus	NA	16189514	ncbi_hprd
STAT1	P40763	P42227	NA	NA	STAT3	P42224	P42225	NA	Nucleus	NA	11594781	ncbi_hprd
STAT1	P40763	P42227	NA	NA	STAT3	P42224	P42225	NA	Nucleus	NA	11722592	ncbi_hprd
STAT1	P40763	P42227	NA	NA	STAT3	P42224	P42225	NA	Nucleus	NA	12070153	BIND
STAT1	P40763	P42227	NA	NA	STAT3	P42224	P42225	NA	Nucleus	NA	12070153	ncbi_hprd
STAT1	P40763	P42227	NA	NA	STAT3	P42224	P42225	NA	Nucleus	NA	16189514	BIND
STAT1	P40763	P42227	NA	NA	STAT3	P42224	P42225	NA	Nucleus	NA	16189514	vidal
STAT1	P40763	P42227	NA	NA	STAT3	P42224	P42225	NA	Nucleus	NA	16189514	ncbi_hprd
STAT3	P40763	P42227	NA	NA	STAT1	P42224	P42225	NA	Nucleus	NA	11594781	ncbi_hprd
STAT3	P40763	P42227	NA	NA	STAT1	P42224	P42225	NA	Nucleus	NA	11722592	ncbi_hprd
STAT3	P40763	P42227	NA	NA	STAT1	P42224	P42225	NA	Nucleus	NA	12070153	BIND
STAT3	P40763	P42227	NA	NA	STAT1	P42224	P42225	NA	Nucleus	NA	12070153	ncbi_hprd
STAT3	P40763	P42227	NA	NA	STAT1	P42224	P42225	NA	Nucleus	NA	16189514	BIND
STAT3	P40763	P42227	NA	NA	STAT1	P42224	P42225	NA	Nucleus	NA	16189514	vidal
STAT3	P40763	P42227	NA	NA	STAT1	P42224	P42225	NA	Nucleus	NA	16189514	ncbi_hprd
STAT3	P40763	P42227	NA	NA	SYK	P43405	P48025	NA	Cytosol	NA	10825200	BIND
STAT3	P40763	P42227	NA	NA	SYK	P43405	P48025	NA	Cytosol	NA	10825200	ncbi_hprd
STAT3	P40763	P42227	NA	NA	SYK	P43405	P48025	NA	Cytosol	NA	16189514	BIND
STAT3	P40763	P42227	NA	NA	SYK	P43405	P48025	NA	Cytosol	NA	16189514	vidal
STAT3	P40763	P42227	NA	NA	SYK	P43405	P48025	NA	Cytosol	NA	16189514	ncbi_hprd
STAT3	P10721	P05532	Adapter	Cytosol	KIT	P40763	P42227	NA	NA	binding	10592173	kegg_mammalian
STAT3	P08581	P16056	NA	NA	MET	P40763	P42227	NA	NA	Binding	9440692	BIND
STAT3	P08581	P16056	NA	NA	MET	P40763	P42227	NA	NA	Binding	9440692	ncbi_hprd
STAT3	P12931	P05480	NA	Cytosol	SRC	P40763	P42227	NA	NA	NA	8657134	BIND
STAT3	P12931	P05480	NA	Cytosol	SRC	P40763	P42227	NA	NA	NA	8657134	ncbi_hprd
STAT3	P12931	P05480	NA	Cytosol	SRC	P40763	P42227	NA	NA	NA	16189514	BIND
STAT3	P12931	P05480	NA	Cytosol	SRC	P40763	P42227	NA	NA	NA	16189514	vidal
STAT3	P12931	P05480	NA	Cytosol	SRC	P40763	P42227	NA	NA	NA	16189514	ncbi_hprd
STAT3	Q06124	P35235	NA	Cytosol	PTPN11	P40763	P42227	NA	NA	NA	11594781	BIND
STAT3	Q06124	P35235	NA	Cytosol	PTPN11	P40763	P42227	NA	NA	NA	11594781	ncbi_hprd
STAT3	Q06124	P35235	NA	Cytosol	PTPN11	P40763	P42227	NA	NA	NA	16189514	BIND
STAT3	Q06124	P35235	NA	Cytosol	PTPN11	P40763	P42227	NA	NA	NA	16189514	vidal
STAT3	Q06124	P35235	NA	Cytosol	PTPN11	P40763	P42227	NA	NA	NA	16189514	ncbi_hprd
STAT5A	P42229	P42230	NA	Nucleus	CRKL	P46109	P47941	NA	NA	Binding	9837784	BIND
STAT5A	P42229	P42230	NA	Nucleus	CRKL	P46109	P47941	NA	NA	Binding	9837784	ncbi_hprd
STAT5A	P42229	P42230	NA	Nucleus	CRKL	P46109	P47941	NA	NA	Binding	11167825	BIND
STAT5A	P42229	P42230	NA	Nucleus	CRKL	P46109	P47941	NA	NA	Binding	11167825	ncbi_hprd
STAT5A	P42229	P42230	NA	Nucleus	SYK	P43405	P48025	NA	Cytosol	NA	10825200	BIND
STAT5A	P42229	P42230	NA	Nucleus	SYK	P43405	P48025	NA	Cytosol	NA	10825200	ncbi_hprd
STAT5A	P42229	P42230	NA	Nucleus	SYK	P43405	P48025	NA	Cytosol	NA	16189514	BIND
STAT5A	P42229	P42230	NA	Nucleus	SYK	P43405	P48025	NA	Cytosol	NA	16189514	vidal
STAT5A	P42229	P42230	NA	Nucleus	SYK	P43405	P48025	NA	Cytosol	NA	16189514	ncbi_hprd
STAT5A	P42229	P42230	NA	Nucleus	SRC	P12931	P05480	NA	Cytosol	NA	10358079	BIND
STAT5A	P42229	P42230	NA	Nucleus	SRC	P12931	P05480	NA	Cytosol	NA	10358079	ncbi_hprd
STAT5A	P42229	P42230	NA	Nucleus	SRC	P12931	P05480	NA	Cytosol	NA	16189514	BIND
STAT5A	P42229	P42230	NA	Nucleus	SRC	P12931	P05480	NA	Cytosol	NA	16189514	vidal
STAT5A	P42229	P42230	NA	Nucleus	SRC	P12931	P05480	NA	Cytosol	NA	16189514	ncbi_hprd
STAT5A	P10721	P05532	Adapter	Cytosol	KIT	P42229	P42230	NA	Nucleus	binding	10592173	kegg_mammalian
STAT5A	P28482	P63085	Kinase	Cytosol	MAPK1	P42229	P42230	NA	Nucleus	Binding	10194762	BIND
STAT5A	P28482	P63085	Kinase	Cytosol	MAPK1	P42229	P42230	NA	Nucleus	Binding	10194762	ncbi_hprd
STAT5A	P28482	P63085	Kinase	Cytosol	MAPK1	P42229	P42230	NA	Nucleus	Binding	10996427	BIND
STAT5A	P28482	P63085	Kinase	Cytosol	MAPK1	P42229	P42230	NA	Nucleus	Binding	10996427	ncbi_hprd
STAT5A	P00519	P00520	Kinase	Cytosol	ABL1	P42229	P42230	NA	Nucleus	binding	10592173	kegg_mammalian
STAT5A	Q06124	P35235	NA	Cytosol	PTPN11	P42229	P42230	NA	Nucleus	NA	10617656	ncbi_hprd
STAT5A	Q06124	P35235	NA	Cytosol	PTPN11	P42229	P42230	NA	Nucleus	NA	12060651	BIND
STAT5A	Q06124	P35235	NA	Cytosol	PTPN11	P42229	P42230	NA	Nucleus	NA	12060651	ncbi_hprd
STAT5A	Q06124	P35235	NA	Cytosol	PTPN11	P42229	P42230	NA	Nucleus	NA	16189514	BIND
STAT5A	Q06124	P35235	NA	Cytosol	PTPN11	P42229	P42230	NA	Nucleus	NA	16189514	vidal
STAT5A	Q06124	P35235	NA	Cytosol	PTPN11	P42229	P42230	NA	Nucleus	NA	16189514	ncbi_hprd
SYK	P43405	P48025	NA	Cytosol	PTK2B	Q14289	Q9QVP9	Kinase	Cytosol	Binding	10747947	BIND
SYK	P43405	P48025	NA	Cytosol	PTK2B	Q14289	Q9QVP9	Kinase	Cytosol	Binding	10747947	ncbi_hprd
SYK	P43405	P48025	NA	Cytosol	JAK1	P23458	P52332	NA	NA	Binding	10825200	BIND
SYK	P43405	P48025	NA	Cytosol	JAK1	P23458	P52332	NA	NA	Binding	10825200	ncbi_hprd
SYK	P43405	P48025	NA	Cytosol	CRKL	P46109	P47941	NA	NA	Binding	11313252	BIND
SYK	P43405	P48025	NA	Cytosol	CRKL	P46109	P47941	NA	NA	Binding	11313252	ncbi_hprd
SYK	P43405	P48025	NA	Cytosol	PIK3R2	O00459	O08908	NA	NA	binding	10592173	kegg_mammalian
SYK	P43405	P48025	NA	Cytosol	PIK3R2	O00459	O08908	NA	NA	binding	15536084	MINT
SYK	P43405	P48025	NA	Cytosol	PIK3R3	Q92569	Q64143	NA	NA	binding	10592173	kegg_mammalian
SYK	P43405	P48025	NA	Cytosol	SHC1	P29353	P98083	NA	Cytosol	binding	10592173	kegg_mammalian
SYK	P43405	P48025	NA	Cytosol	GAB2	Q9UQC2	Q9Z1S8	NA	NA	binding	10592173	kegg_mammalian
SYK	P43405	P48025	NA	Cytosol	SRC	P12931	P05480	NA	Cytosol	Phosphorylation	7513017	BIND
SYK	P43405	P48025	NA	Cytosol	SRC	P12931	P05480	NA	Cytosol	Phosphorylation	7513017	SAVI
SYK	P43405	P48025	NA	Cytosol	SRC	P12931	P05480	NA	Cytosol	Phosphorylation	7513017	ncbi_hprd
SYK	P43405	P48025	NA	Cytosol	SRC	P12931	P05480	NA	Cytosol	Phosphorylation	16189514	BIND
SYK	P43405	P48025	NA	Cytosol	SRC	P12931	P05480	NA	Cytosol	Phosphorylation	16189514	vidal
SYK	P43405	P48025	NA	Cytosol	SRC	P12931	P05480	NA	Cytosol	Phosphorylation	16189514	ncbi_hprd
SYK	P43405	P48025	NA	Cytosol	PLCG2	P16885	NA	NA	NA	phosphorylation	10592173	kegg_mammalian
SYK	P40763	P42227	NA	NA	STAT3	P43405	P48025	NA	Cytosol	NA	10825200	BIND
SYK	P40763	P42227	NA	NA	STAT3	P43405	P48025	NA	Cytosol	NA	10825200	ncbi_hprd
SYK	P40763	P42227	NA	NA	STAT3	P43405	P48025	NA	Cytosol	NA	16189514	BIND
SYK	P40763	P42227	NA	NA	STAT3	P43405	P48025	NA	Cytosol	NA	16189514	vidal
SYK	P40763	P42227	NA	NA	STAT3	P43405	P48025	NA	Cytosol	NA	16189514	ncbi_hprd
SYK	P42229	P42230	NA	Nucleus	STAT5A	P43405	P48025	NA	Cytosol	NA	10825200	BIND
SYK	P42229	P42230	NA	Nucleus	STAT5A	P43405	P48025	NA	Cytosol	NA	10825200	ncbi_hprd
SYK	P42229	P42230	NA	Nucleus	STAT5A	P43405	P48025	NA	Cytosol	NA	16189514	BIND
SYK	P42229	P42230	NA	Nucleus	STAT5A	P43405	P48025	NA	Cytosol	NA	16189514	vidal
SYK	P42229	P42230	NA	Nucleus	STAT5A	P43405	P48025	NA	Cytosol	NA	16189514	ncbi_hprd
ZAP70	P43403	P43404	NA	Cytosol	PTK2B	Q14289	Q9QVP9	Kinase	Cytosol	Binding	10867021	BIND
ZAP70	P43403	P43404	NA	Cytosol	PTK2B	Q14289	Q9QVP9	Kinase	Cytosol	Binding	10867021	ncbi_hprd
ZAP70	P43403	P43404	NA	Cytosol	GAB2	Q9UQC2	Q9Z1S8	NA	NA	Binding	11572860	BIND
ZAP70	P43403	P43404	NA	Cytosol	GAB2	Q9UQC2	Q9Z1S8	NA	NA	Binding	11572860	ncbi_hprd
ZAP70	P43403	P43404	NA	Cytosol	ABL1	P00519	P00520	Kinase	Cytosol	Binding	7760813	BIND
ZAP70	P43403	P43404	NA	Cytosol	ABL1	P00519	P00520	Kinase	Cytosol	Binding	7760813	ncbi_hprd
ZAP70	P43403	P43404	NA	Cytosol	PIK3R2	O00459	O08908	NA	NA	binding	10592173	kegg_mammalian
ZAP70	P43403	P43404	NA	Cytosol	PIK3R3	Q92569	Q64143	NA	NA	binding	10592173	kegg_mammalian
ZAP70	P43403	P43404	NA	Cytosol	CRK	P46108	Q64010	NA	Cytosol	NA	10419455	BIND
ZAP70	P43403	P43404	NA	Cytosol	CRK	P46108	Q64010	NA	Cytosol	NA	10419455	ncbi_hprd
ZAP70	P43403	P43404	NA	Cytosol	CRK	P46108	Q64010	NA	Cytosol	NA	16189514	BIND
ZAP70	P43403	P43404	NA	Cytosol	CRK	P46108	Q64010	NA	Cytosol	NA	16189514	vidal
ZAP70	P43403	P43404	NA	Cytosol	CRK	P46108	Q64010	NA	Cytosol	NA	16189514	ncbi_hprd
ZAP70	P43403	P43404	NA	Cytosol	SHC1	P29353	P98083	NA	Cytosol	NA	8761298	BIND
ZAP70	P43403	P43404	NA	Cytosol	SHC1	P29353	P98083	NA	Cytosol	NA	8761298	ncbi_hprd
ZAP70	P43403	P43404	NA	Cytosol	SHC1	P29353	P98083	NA	Cytosol	NA	9685404	BIND
ZAP70	P43403	P43404	NA	Cytosol	SHC1	P29353	P98083	NA	Cytosol	NA	9685404	ncbi_hprd
ZAP70	P43403	P43404	NA	Cytosol	SHC1	P29353	P98083	NA	Cytosol	NA	10592173	kegg_mammalian
ZAP70	P43403	P43404	NA	Cytosol	SHC1	P29353	P98083	NA	Cytosol	NA	16189514	BIND
ZAP70	P43403	P43404	NA	Cytosol	SHC1	P29353	P98083	NA	Cytosol	NA	16189514	vidal
ZAP70	P43403	P43404	NA	Cytosol	SHC1	P29353	P98083	NA	Cytosol	NA	16189514	ncbi_hprd
ZAP70	P43403	P43404	NA	Cytosol	MAPK14	Q16539	P47811	NA	Cytosol	phosphorylation	10592173	kegg_mammalian
ZAP70	P43403	P43404	NA	Cytosol	MAPK11	Q15759	Q9WUI1	NA	NA	phosphorylation	10592173	kegg_mammalian
ZAP70	P43403	P43404	NA	Cytosol	MAPK13	O15264	Q9Z1B7	NA	NA	phosphorylation	10592173	kegg_mammalian
ZAP70	P43403	P43404	NA	Cytosol	MAPK12	P53778	O08911	NA	Cytosol	phosphorylation	10592173	kegg_mammalian
ZAP70	P19174	Q62077	Phospholipase	Cytosol	PLCG1	P43403	P43404	NA	Cytosol	Binding	7629168	BIND
ZAP70	P19174	Q62077	Phospholipase	Cytosol	PLCG1	P43403	P43404	NA	Cytosol	Binding	7629168	ncbi_hprd
