# Supplementary material for: The DIONESUS algorithm provides scalable and accurate reconstruction of dynamic phosphoproteomic networks to reveal new drug targets
Source: Royal Society of Chemistry journal article supplement (doi:10.1039/c5ib00065c), 2015-01-01
Supplement: c5ib00065c7.xlsx [file c5ib00065c7.xlsx]

## Sheet: Supplementary Table 1
Supplementary Table 2: Antibody information
Antibody Name	Gene Name	Full Name	Antibody #	Company	Catalog Number	Lot Number	Monoclonal/ Polyclonal	Species	Dilution	Band Size (kDa)
p-ABL(C-)(Y245)	ABL1	v-akt murine thymoma viral oncogene homolog 1	P7	Cell Signaling	2861	1	Polyclonal	Rabbit	1:500	135
p-AKT(S473)	AKT1	v-akt murine thymoma viral oncogene homolog 1	P9	Cell Signaling	4058	5	Polyclonal	Rabbit	1:500	60
p-CDC2(Y15)	CDC2	Cell division cycle 2, G1 to S and G2 to M	P20	Cell Signaling	9111	8	Polyclonal	Rabbit	1:500	34
p-CDK2(T160)	CDK2	cyclin-dependent kinase 2	P21	Cell Signaling	2561	2	Polyclonal	Rabbit	1:500	33
p-CREB(S133)	CREB1	CAMP responsive element binding protein 1	P30	Cell Signaling	9198	4	Polyclonal	Rabbit	1:500	43
p-CRKII(Y221)	CRK	v-crk sarcoma virus CT10 oncogene homolog (avian)	P31	Cell Signaling	3491	2	Polyclonal	Rabbit	1:500	42
p-CRKL(Y207)	CRKL	v-crk sarcoma virus CT10 oncogene homolog (avian)-like	P32	Cell Signaling	3181	6	Polyclonal	Rabbit	1:500	39
p-EGFR(Y1068)	EGFR	epidermal growth factor receptor (erythroblastic leukemia viral (v-erb-b) oncogene homolog, avian)	P34	Invitrogen (Biosource)	44-788ZG	305	Polyclonal	Rabbit	1:10000	175
p-EGFR(Y1086)	EGFR	epidermal growth factor receptor (erythroblastic leukemia viral (v-erb-b) oncogene homolog, avian)	P35	Invitrogen (Biosource)	44-790ZG	402	Polyclonal	Rabbit	1:10000	175
p-EGFR(Y1173)	EGFR	epidermal growth factor receptor (erythroblastic leukemia viral (v-erb-b) oncogene homolog, avian)	F5	Santa Cruz	sc-12351	F2806	Polyclonal	Rabbit	1:1000	175
p-EGFR(Y845)	EGFR	epidermal growth factor receptor (erythroblastic leukemia viral (v-erb-b) oncogene homolog, avian)	P33	Invitrogen (Biosource)	44-784ZG	307	Polyclonal	Rabbit	1:10000	175
p-ERBB2(Y1221/1222)	ERBB2	V-erb-b2 erythroblastic leukemia viral oncogene homolog 2, neuro/glioblastoma derived oncogene homolog (avian)	P38	Cell Signaling	2243	4	Polyclonal	Rabbit	1:500	185
p-ERBB4(Y1284)	ERBB4	V-erb-a erythroblastic leukemia viral oncogene homolog 4 (avian)	P41	Cell Signaling	4757	2	Polyclonal	Rabbit	1:500	180
p-ERK1/2(T202/Y204)	MAPK1	Mitogen-activated protein kinase 1/3	P42	Cell Signaling	9106S	27	Monoclonal	Mouse	1:500	40,42
p-ERK1/2(T202/Y204)	MAPK3	Mitogen-activated protein kinase 1/3	P42	Cell Signaling	9106S	27	Monoclonal	Mouse	1:500	40,42
p-FAK(Y576/577)	PTK2	Protein tyrosine kinase 2	P45	Cell Signaling	3281	5	Polyclonal	Rabbit	1:500	125
p-FGFR1(Y653/654)	FGFR1	Fibroblast growth factor receptor 1	P46	Cell Signaling	3471	4	Polyclonal	Rabbit	1:500	145
p-FOXO1(S319)/FOXO4(S262)	FOXO1A	Forkhead box O1/Forkhead Box 04	P48	Cell Signaling	2487	1	Polyclonal	Rabbit	1:500	78-82
p-FOXO1(S319)/FOXO4(S262)	FOXO4	Forkhead box O1/Forkhead Box 04	P48	Cell Signaling	2487	1	Polyclonal	Rabbit	1:500	78-82
p-FOXO3A(S253)	FOXO3A	Forkhead box O3a	P50	Cell Signaling	9466	1	Polyclonal	Rabbit	1:500	95
p-GAB1(Y627)	GAB1	GRB2-associated binding protein 1	P52	Cell Signaling	3231	4	Polyclonal	Rabbit	1:500	110
p-GAB2(S159)	GAB2	GRB2-associated binding protein 2	P53	Cell Signaling	3884	1	Polyclonal	Rabbit	1:500	98
p-GSK3A(S21)	GSK3A	Glycogen synthase kinase 3 alpha	P55	Cell Signaling	9316	6	Polyclonal	Rabbit	1:500	51
p-IGF1RB(Y1135/1136)/INSRB	IGF1R	Insulin-like growth factor 1 receptor/Insulin Receptor	P57	Cell Signaling	3024	7	Polyclonal	Rabbit	1:500	95
p-IRS1(S1101)	IRS1	Insulin receptor substrate 1	P61	Cell Signaling	2385	2	Polyclonal	Rabbit	1:500	180
p-JAK1(Y1022/1023)	JAK1	Janus kinase 1	P63	Cell Signaling	3331	3	Polyclonal	Rabbit	1:500	130
p-KIT(C-)(Y719)	KIT	V-kit Hardy-Zuckerman 4 feline sarcoma viral oncogene homolog	P25	Cell Signaling	3391	8	Polyclonal	Rabbit	1:500	145
p-MEK(1/2)(S217/221)	MAP2K1	Mitogen-activated protein kinase kinase 1/2	P66	Cell Signaling	2454P	3	Polyclonal	Rabbit	1:500	45
p-MEK(1/2)(S217/221)	MAP2K2	Mitogen-activated protein kinase kinase 1/2	P66	Cell Signaling	2454P	3	Polyclonal	Rabbit	1:500	45
p-MET(Y1234/1235)	MET	Met proto-oncogene (hepatocyte growth factor receptor)	P69	Cell Signaling	3129	2	Polyclonal	Rabbit	1:500	170145
p-MET(Y1349)	MET	Met proto-oncogene (hepatocyte growth factor receptor)	P70	Cell Signaling	3133	2	Polyclonal	Rabbit	1:500	170145
p-MTOR(S2448)	FRAP1	FK506 binding protein 12-rapamycin associated protein 1	P72	Cell Signaling	2971	4	Polyclonal	Rabbit	1:500	289
p-P38MAPK(T180/Y182)	MAPK11	Mitogen-activated Protein Kinase 11/12/13/14	P75/76	Cell Signaling	9216	4	Monoclonal	Mouse	1:500	40
p-P38MAPK(T180/Y182)	MAPK12	Mitogen-activated Protein Kinase 11/12/13/14	P75/76	Cell Signaling	9216	4	Monoclonal	Mouse	1:500	40
p-P38MAPK(T180/Y182)	MAPK13	Mitogen-activated Protein Kinase 11/12/13/14	P75/76	Cell Signaling	9216	4	Monoclonal	Mouse	1:500	40
p-P38MAPK(T180/Y182)	MAPK14	Mitogen-activated Protein Kinase 11/12/13/14	P75/76	Cell Signaling	9216	4	Monoclonal	Mouse	1:500	40
p-P70S6K(T421/S424)	RPS6KB1	Ribosomal protein S6 kinase, 70kDaa, polypeptide 1	P79	Cell Signaling	9204	1	Polyclonal	Rabbit	1:500	85
p-P90RSK(S380)	RPS6KA1	Ribosomal protein S6 kinase, 90kDaa, polypeptide 5	P81	Cell Signaling	9341	6	Polyclonal	Rabbit	1:500	90
p-PDFGRA(Y849)/PDGFRB(Y857)	PDGFRA	Platelet-derived growth factor receptor, alpha polypeptide	P83	Cell Signaling	3170	1	Polyclonal	Rabbit	1:500	190
p-PDFGRA(Y849)/PDGFRB(Y857)	PDGFRB	Platelet-derived growth factor receptor, alpha polypeptide	P83	Cell Signaling	3170	1	Polyclonal	Rabbit	1:500	190
p-PDGFRA(Y754)	PDGFRA	Platelet-derived growth factor receptor, alpha polypeptide	P84	Cell Signaling	2992	2	Polyclonal	Rabbit	1:500	190,70
p-PDGFRB(Y1009)	PDGFRB	Platelet-derived growth factor receptor, beta polypeptide	P86/87	Cell Signaling	3124	1	Polyclonal	Rabbit	1:500	190
p-PDK1(S241)	PDPK1	3-phosphoinositide dependent protein kinase-1	P88	Cell Signaling	3061	7	Polyclonal	Rabbit	1:500	58-68
p-PI3KP85(Y458)P55(Y199)	PIK3R2	Phosphoinositide-3-kinase, regulatory subunit 2 (p85 beta)	P89	Cell Signaling	4228	2	Polyclonal	Rabbit	1:500	85
p-PI3KP85(Y458)P55(Y199)	PIK3R3	Phosphoinositide-3-kinase, regulatory subunit 2 (p85 beta)	P89	Cell Signaling	4228	2	Polyclonal	Rabbit	1:500	85
p-PKCD(T505)	PRKCD	Protein kinase C, delta	P97	Cell Signaling	9374	3	Polyclonal	Rabbit	1:500	78
p-PKCPAN/G(T514)	PRKCG	Protein kinase C, gamma	P98	Cell Signaling	9379	1	Polyclonal	Rabbit	1:500	78,80,82,84
p-PLCG1(Y783)	PLCG1	Phospholipase C, gamma 1	P103	Cell Signaling	2821	3	Polyclonal	Rabbit	1:500	155
p-PLCG2(Y759)	PLCG2	Phospholipase C, gamma 2	P105	Cell Signaling	3874	1	Polyclonal	Rabbit	1:500	150
p-PTEN(S380)	PTEN	Phosphatase and tensin homolog	P106	Cell Signaling	9551	5	Polyclonal	Rabbit	1:500	54
p-PYK2(Y402)	PTK2B	PTK2B protein tyrosine kinase 2 beta	P108	Cell Signaling	3291	3	Polyclonal	Rabbit	1:500	116
p-RAF(C-)(S289/296/301)	RAF1	V-raf-1 murine leukemia viral oncogene homolog 1	P28	Cell Signaling	9431	1	Polyclonal	Rabbit	1:500	74
p-RAF(C-)(S338)	RAF1	V-raf-1 murine leukemia viral oncogene homolog 1	P29	Cell Signaling	9427	3	Polyclonal	Rabbit	1:500	74
p-S6RIBPROT(S240/244)	RPS6	Ribosomal protein S6	P112	Cell Signaling	2215	2	Polyclonal	Rabbit	1:500	32
p-SAPK/JNK(T183/Y185)	MAPK8	C-Jun N-terminal kinase	P113/114	Cell Signaling	4671	3	Polyclonal	Rabbit	1:500	54
p-SAPK/JNK(T183/Y185)	MAPK9	C-Jun N-terminal kinase	P113/114	Cell Signaling	4671	3	Polyclonal	Rabbit	1:500	54
p-SAPK/JNK(T183/Y185)	MAPK10	C-Jun N-terminal kinase	P113/114	Cell Signaling	4671	3	Polyclonal	Rabbit	1:500	54
p-SHC(Y239/240)	SHC1	SHC (Src homology 2 domain containing) transforming protein 1	P136	Cell Signaling	2434	3	Polyclonal	Rabbit	1:500	66
p-SHP2(Y542)	PTPN11	Similar to Tyrosine-protein phosphatase non-receptor type 2	P118	Cell Signaling	3751	2	Polyclonal	Rabbit	1:500	72
p-SRC(Y416)	SRC	Rous sarcoma oncogene	P121	Cell Signaling	2101	14	Polyclonal	Rabbit	1:500	60
p-SRC(Y527)	SRC	Rous sarcoma oncogene	P122	Cell Signaling	2105	6	Polyclonal	Rabbit	1:500	60
p-STAT1(Y701)	STAT1	signal transducer and activator of transcription 1	P123/124	Cell Signaling	9171	6	Polyclonal	Rabbit	1:500	91
p-STAT3(S727)	STAT3	signal transducer and activator of transcription 3	P126	Cell Signaling	9134	5	Polyclonal	Rabbit	1:500	86
p-STAT3(Y705)	STAT3	signal transducer and activator of transcription 3	P129	Cell Signaling	9131	8	Polyclonal	Rabbit	1:500	86
p-STAT5(Y694)	STAT5A	signal transducer and activator of transcription 5A	P130	Cell Signaling	9351	3	Polyclonal	Rabbit	1:500	92
p-STAT6(Y641)	STAT6	signal transducer and activator of transcription 6 (predicted)	P131	Cell Signaling	9361	9	Polyclonal	Rabbit	1:500	100
p-SYK(Y525/526)	SYK	spleen tyrosine kinase	P133	Cell Signaling	2710	6	Polyclonal	Rabbit	1:500	72
p-4EBP1(S65)	EIF4EBP1	eukaryotic translation initiation factor 4E binding protein 1	P2/3	Cell Signaling	9456	1	Polyclonal	Rabbit	1:500	15-20
p-4EBP1(T37/46)	EIF4EBP1	eukaryotic translation initiation factor 4E binding protein 1	P4	Cell Signaling	2855	6	Polyclonal	Rabbit	1:500	15-20
p-ZAP70(Y319)/SYK(Y352)	ZAP70	zeta-chain (TCR) associated protein kinase 70 (mapped)	P134	Cell Signaling	2701	4	Polyclonal	Rabbit	1:500	70
