# Supplementary material for: The DIONESUS algorithm provides scalable and accurate reconstruction of dynamic phosphoproteomic networks to reveal new drug targets
Source: Royal Society of Chemistry journal article supplement (doi:10.1039/c5ib00065c), 2015-01-01
Supplement: c5ib00065c8.xlsx [file c5ib00065c8.xlsx]

## Sheet: Sheet1
Supplementary Table 3: Raw input matrix for clustering and linear regression
120123	Media X1	EGF200 X1	EGF200+Insulin200 X1	HGF200 X1	HGF200+Insulin200 X1	Insulin200 X1	IGF200 X1	Media X2	EGF200 X2	EGF200 PP2 X2	EGF200 U73122 X2	EGF200 Wortmannin X2	Media X3	EGF200 X3	EGF200 Aprotinin X3	EGF200 GM6001 X3	EGF200 TAPI-1 X3	Media X4	EGF200 X4	EGF200 CAPE X4	EGF200 N-Acetylcysteine X4	Media X5	EGF200 X5	EGF200 DPI X5	EGF200 Clostridium Toxin B X5	EGF200 PHPS2 X5	Media X6	EGF200 X6	EGF200 DPI X6	EGF200 PP2 X6	EGF200 EMBPTP1BI X6
Experiment#	1	1	1	1	1	1	1	2	2	2	2	2	3	3	3	3	3	4	4	4	4	5	5	5	5	5	6	6	6	6	6
Inhibitor Name										PP2	U73122	Wortmannin			Aprotinin	GM6001	TAPI-1			CAPE	N-Acetylcysteine			DPI	Clostridium Toxin B	PHPS2			DPI	PP2	EMBPTP1BI
Inhibitor Concentration										10 uM	10 uM	10 uM			1 ug/mL	25 uM	100 uM			10 uM	30 mM			25 uM	2 ng/mL	20 uM			10 uM	200 nM	25 uM
Growth Factor	Media	EGF	EGF+Insulin	HGF	HGF+Insulin	Insulin	IGF	Media	EGF	EGF	EGF	EGF	Media	EGF	EGF	EGF	EGF	Media	EGF	EGF	EGF	Media	EGF	EGF	EGF	EGF	Media	EGF	EGF	EGF	EGF
Growth Factor Concentration(ng/mL)		200	200200	200	200200	200	200		200	200	200	200		200	200	200	200		200	200	200		200	200	200	200		200	200	200	200
log10(Fold Change in Phosphorylation from Time -30 min)
p-AKT(S473)[15m]	0.457949	0.562173	0.763436	0.847757	0.824143	0.640629	0.916781	0.345272	0.614605	0.215129	0.281244	-0.406851	1.25592	1.19505	1.13325	1.14842	1.08475	1.12294	1.00486	0.834749	0.750652	0.0598169	-0.066941	0.108148	0.132746	0.294421	0.631467	0.87523	0.77936	0.506931	0.447475
p-S6RIBPROT(S240/244)[15m]	0.433717	0.557411	0.679063	0.53868	0.558848	0.535276	0.582691	0.402474	0.412823	-0.12688	0.0935311	-0.151596	1.23036	1.13094	1.01783	0.995388	0.949461	1.03715	0.852916	0.667295	0.999437	0.144433	0.233201	0.25922	0.133479	0.310674	0.922204	1.12638	0.703124	0.770581	0.645706
p-EGFR(Y1086)[05m]	0.219056	0.913059	1.11315	0.218217	0.226904	0.185293	0.0859603	0.0407203	1.5909	0.867059	1.06712	1.4352	0.150502	1.70185	1.80368	1.7065	1.54351	0.347782	1.39452	1.22129	1.39065	0.292459	1.84073	1.85664	1.59101	1.84462	0.236509	1.78903	1.75514	1.57147	1.74607
p-EGFR(Y1086)[15m]	0.158353	1.01242	1.31837	-0.0245799	0.0822339	0.0415764	0.193642	0.066077	1.74474	0.997551	1.18307	1.30256	0.287335	1.49732	1.60797	1.57215	1.60434	0.464421	1.1269	1.15393	1.23597	0.571661	2.00363	1.95562	1.85879	2.11798	0.365533	1.68642	1.53852	1.36552	1.40748
p-CDK2(T160)[15m]	0.413579	0.481751	0.583111	0.612749	0.538566	0.515694	0.664307	0.12184	0.172196	0.110742	0.0611904	0.0966475	0.86561	0.726754	0.674597	0.763156	0.672777	0.704149	0.464359	0.413911	0.822966	0	0	0	0	0	1.0152	1.03744	1.07359	1.02408	0.980544
p-AKT(S473)[05m]	0.361913	0.432899	0.638576	0.876622	0.84418	0.764304	0.823841	0.387546	0.393002	0.0253358	-0.0102754	-0.559776	1.11584	1.00956	1.02994	1.06625	0.888659	0.770512	0.826714	0.750714	0.337646	-0.118881	0.0721575	0.12471	0.0123746	0.238367	0.686375	0.785997	0.806882	0.614017	0.740463
p-STAT1(Y701)[05m]	0.0657489	0.248144	0.249444	0.0708302	0.0397699	-0.0175222	0.0894357	0.0261114	0.918652	0.20981	0.673523	0.861594	0.207906	0.975677	1.05868	1.02328	1.03903	0.240343	1.00213	1.03159	0.43393	0.109123	1.32348	1.36981	1.17831	1.55212	0.0441004	0.925048	0.785876	0.488567	0.886972
p-CDK2(T160)[05m]	0.394423	0.408888	0.554225	0.538142	0.587662	0.506658	0.58857	0.0872378	0.0829286	0.127454	0.055538	0.0290768	0.779685	0.773779	0.786186	0.712692	0.569073	0.672684	0.74973	0.749894	0.694674	0	0	0	0	0	1.13038	1.09511	1.15017	0.98362	1.13273
p-PDK1(S241)[15m]	0.421373	0.380828	0.306404	0.352664	0.335586	0.391678	0.485322	0.134657	0.14786	0.109148	0.199492	0.154781	0.310305	-0.198758	-0.785262	-0.433694	-0.0529102	0.328602	0.146318	0.256609	0.412971	0.477912	0.403198	0.332101	0.303169	0.479844	0.531927	0.516294	0.443717	0.474656	0.380658
p-PKCPAN/G(T514)[05m]	0.332507	0.377027	0.642269	0.650481	0.66937	0.544012	0.674617	0.0994338	0.128183	0.101577	0.110489	0.0376246	1.0291	1.09833	1.09392	1.01255	0.785049	0.783868	0.785179	0.729265	0.403159	0.0267422	-0.0299157	0.0279965	-0.125028	-0.0589919	0.665212	0.740195	0.866559	0.514159	0.650638
p-RAF(C-)(S338)[15m]	0.362773	0.387478	0.478642	0.702629	0.669592	0.700261	0.43339	0.068582	0.0637155	0.0411384	0.0206266	0.0258824	0.727035	0.793611	0.798662	0.780024	0.73497	0.171802	0.0735906	-0.051368	0.692136	0.728068	0.796846	0.783517	0.806708	0.766981	0.456698	0.611068	0.588977	0.445805	0.393337
p-PKCPAN/G(T514)[15m]	0.495572	0.602163	0.737924	0.713444	0.490604	0.566409	0.646141	0.0969227	0.203796	0.0435204	0.0462549	0.0724813	1.26215	0.947935	0.947139	1.13987	1.01508	1.06641	0.96999	0.795642	0.779757	-0.125223	-0.366099	-0.22455	-0.246739	-0.116658	0.440473	0.612863	0.758031	0.642525	0.590547
p-PLCG2(Y759)[05m]	-0.016863	0.665366	0.61818	-0.0212809	0.00432167	-0.0639727	-0.0483063	0.0488124	0.776617	0.332076	0.480097	0.632465	0.116802	0.936295	1.07656	1.12945	1.20879	0.267034	0.77947	0.825603	1.01341	0.12693	1.10653	1.1428	0.860713	1.05756	0.198585	1.29446	1.22704	1.04003	1.21352
p-PLCG2(Y759)[15m]	0.0424466	0.547579	0.879423	0.0194416	-0.0590239	-0.111653	-0.00708262	-0.0404965	0.775693	0.244721	0.432874	0.470732	0.288636	1.18946	1.13065	1.08343	1.08007	0.334345	0.880742	0.803576	0.753361	0.21687	1.12596	1.1567	0.972122	1.29266	0.149027	1.21773	1.0956	0.878773	0.970988
p-P38MAPK(T180/Y182)[00m]	-0.587198	-0.587198	-0.587198	-0.587198	-0.587198	-0.587198	-0.587198	-0.0671917	-0.0671917	-0.523159	-0.0304781	0.158022	0.463389	0.463389	0.589926	0.49464	0.538733	0.705106	0.705106	0.564647	0.373976	-0.020666	-0.020666	0.105652	-0.186045	-0.0724066	0.222087	0.222087	0.472206	0.25844	0.449822
p-EGFR(Y1068)[15m]	0.0175982	0.653647	0.811301	-0.445237	-0.228028	-0.237049	-0.163128	0.154514	1.51997	1.1104	1.14481	1.25839	0.366413	0.93311	1.02645	1.02156	1.02623	-0.283548	0.382054	0.479744	0.539242	0.457714	1.25222	1.27788	1.10986	1.3237	0.141307	0.930959	0.857515	0.762163	0.841776
p-RAF(C-)(S338)[05m]	0.133877	0.212993	0.479638	0.745727	0.776397	0.637882	0.62353	-0.0199637	-0.034638	-0.0322727	-0.0067465	0.0327911	0.749988	0.884538	0.853764	0.785145	0.606448	0.316524	0.383863	0.176739	0.327666	0.763468	0.8883	0.885963	0.805068	0.614603	0.574617	0.783769	0.764982	0.588473	0.731589
p-EGFR(Y845)[05m]	0.146488	0.808093	0.771906	-0.0579134	-0.00658545	-0.0821973	-0.0495588	-0.142314	0.913265	0.457156	0.647739	0.699093	0.11701	0.987933	1.08247	1.04599	0.998578	0.100172	0.561409	0.52772	0.525454	-0.10126	0.679638	0.659739	0.627489	0.673619	0.29141	0.854825	0.79864	0.641415	0.752428
p-MEK(1/2)(S217/221)[00m]	-0.360225	-0.360225	-0.360225	-0.360225	-0.360225	-0.360225	-0.360225	-0.0671981	-0.0671981	-0.209314	0.0181156	-0.117785	-0.189277	-0.189277	-0.215316	-0.234679	-0.0428095	0.108954	0.108954	0.0731548	-0.0840069	-0.084587	-0.084587	-0.160295	-0.12042	-0.184739	-0.132436	-0.132436	0.0071199	0.0234036	0.103295
p-GAB2(S159)[15m]	0.446852	0.283328	0.390913	0.435896	0.726794	0.650995	0.724191	0.286367	0.432681	0.192494	0.278103	0.198918	0.218295	0.300591	0.230747	0.176199	0.0933764	-0.217143	-0.321034	-0.265233	-0.0929888	0.187896	0.291703	0.193888	0.191896	0.108264	0.248002	0.335479	0.269391	0.136844	0.0655915
p-MET(Y1234/1235)[05m]	0.179131	0.864771	0.864997	0.0743597	0.0668884	-0.0949327	-0.0446689	-0.0213578	0.904882	0.608554	0.704104	0.800365	0.202637	1.12094	1.28107	1.32217	1.17756	0.0326716	0.587316	0.67934	0.708616	0.190692	0.950566	1.03469	0.904323	1.00107	0.233345	1.11455	1.10022	0.96185	1.10614
p-STAT1(Y701)[15m]	0.16995	0.210604	0.335194	0.179464	0.0769692	0.0514968	0.164335	-5.65292e-05	0.781607	0.102006	0.54204	0.577473	0.215077	1.08646	1.13827	1.24729	1.16546	0.303678	1.01303	1.01264	0.656951	0.540529	1.35388	1.46151	1.05402	1.46379	-0.0570624	0.900906	0.880939	0.412658	0.642803
p-GAB2(S159)[05m]	0.304864	0.203631	0.3382	0.674854	0.640936	0.665526	0.60482	0.198182	0.226365	0.167566	0.218624	0.148483	0.242447	0.189442	0.189747	0.20303	0.116547	-0.0500838	-0.0443577	-0.220754	-0.0294963	0.198898	0.142625	0.166561	0.179305	0.0870721	0.259081	0.376276	0.407648	0.424369	0.38082
p-PDK1(S241)[05m]	0.13531	0.139912	0.37369	0.619999	0.51033	0.582413	0.537028	0.117401	0.0977362	0.174467	0.128799	0.169776	0.653228	0.600029	0.599576	0.501428	0.328666	0.259771	0.446842	0.297432	0.469206	0.391865	0.462399	0.473669	0.375365	0.374142	0.474016	0.553688	0.621127	0.546891	0.577876
p-EGFR(Y1068)[05m]	0.066512	0.58386	0.763726	-0.0194242	0.0385391	0.0289305	-0.213272	-0.00755673	1.42998	0.846398	1.13836	1.32165	0.266711	0.983729	1.00262	0.915575	0.856419	-0.107179	0.709141	0.484326	0.660008	0.358216	1.10797	1.12527	0.962513	1.04275	0.141975	1.06012	1.09415	0.911017	0.975151
p-ERK(T202/Y204)[05m]	-0.401516	0.260751	0.329158	0.568668	0.628227	0.257562	0.100977	0.52305	0.828122	0.470799	0.456653	0.776996	0.503099	0.703841	0.677012	0.664402	0.487401	0.621553	0.851503	0.775508	0.910317	0.641327	0.918338	0.982717	0.832299	0.848069	0.244868	0.760324	0.689075	0.625925	0.660517
p-PDFGRA(Y849)/…[15m]	0.0338455	0.494106	0.686888	-0.164508	-0.155387	-0.10046	0.0746296	0	0	0	0	0	0.501241	1.27481	1.32459	1.24721	0.986227	0.28154	0.868018	0.917609	0.909435	0.478803	1.30969	1.29253	1.24976	1.0114	0.198268	0.848442	0.712917	0.518668	0.754905
p-EGFR(Y1173)[05m]	0.309896	0.83628	0.856615	-0.0562513	-0.0857327	-0.117979	-0.134062	0.15882	0.922131	0.750862	0.812431	0.801263	-0.149155	0.923636	0.868975	0.882037	0.984362	0.181823	0.779816	0.750406	0.808944	0.148748	1.0434	1.07301	0.778871	0.837224	0.262135	0.850918	0.92147	0.773646	1.00037
p-FGFR1(Y653/654)[05m]	0.10673	0.437222	0.471556	0.00797374	0.087132	-0.012382	0.428374	-0.0107317	0.628851	0.279491	0.418079	0.566597	0.0294775	0.836618	0.885839	0.912372	0.904571	0.110185	0.300296	0.406926	0.100572	-0.00633858	0.800946	0.968554	0.712131	0.995772	0.379532	1.01409	1.02697	0.810151	1.03883
p-PDFGRA(Y849)/…[05m]	0.0268803	0.4372	0.618185	0.125632	0.229733	0.127629	0.0263229	0	0	0	0	0	0.47451	1.36273	1.42932	1.41956	1.2797	0.603713	1.31365	1.11607	1.21267	0.488626	1.40438	1.45774	1.44668	1.28425	0.173446	0.966981	0.923108	0.659035	0.94164
p-FAK(Y576/577)[15m]	0.0783162	0.192863	0.312276	-0.181025	-0.150957	-0.118348	0.0406272	0.00864353	0.14504	-0.0333099	0.0259737	0.0438383	0.45643	1.05715	1.11221	1.0428	0.939258	-0.313094	0.257086	0.32312	0.346448	0.468251	1.11695	1.12665	1.13441	1.0434	0.478114	1.10936	1.01578	0.851224	0.874689
p-PLCG1(Y783)[05m]	0.0682181	0.700632	0.699996	-0.0351867	0.0179935	-0.011187	-0.0128083	0.136482	0.653009	0.440424	0.47754	0.560071	0.438301	0.936369	0.964622	0.888445	1.07503	-0.0128054	0.2983	0.374674	0.26822	-0.0845711	0.518446	0.569304	0.397564	0.506016	-0.0426925	0.976442	0.93011	0.715686	0.940166
p-EGFR(Y845)[15m]	0.0533846	0.691755	0.938913	0.0249706	-0.034901	-0.0597663	-0.00571002	0.00537243	0.893508	0.378527	0.584473	0.601118	0.0458868	1.01974	0.961715	0.965568	0.878468	0.13957	0.418728	0.378438	0.380694	0.231956	0.583596	0.659515	0.517932	0.755897	0.15928	0.684983	0.642282	0.49487	0.518144
p-PLCG1(Y783)[15m]	0.0984291	0.602215	0.849325	0.0640646	0.032718	-0.0203513	0.0302302	0.028386	0.637568	0.331095	0.429538	0.413775	0.354122	1.09648	0.873741	0.91476	0.850217	0.00374221	0.600392	0.542686	0.468986	-0.010073	0.483317	0.537865	0.398378	0.6839	0.0733846	0.909669	0.833706	0.633012	0.698218
p-GSK3A(S21)[05m]	0.113615	0.237914	0.413304	0.727641	0.720146	0.723042	0.572712	0.156189	0.256125	0.0542018	-0.0136456	0.0167216	0.585006	0.521566	0.576739	0.455047	0.259168	-0.129486	0.111238	0.165027	-0.0802314	0.350498	0.501494	0.558212	0.347837	0.450704	0.239303	0.470278	0.421207	0.348949	0.332803
p-FOXO1(S319)/…[00m]	-0.25934	-0.25934	-0.25934	-0.25934	-0.25934	-0.25934	-0.25934	0.0310956	0.0310956	0.0111908	0.0695185	0.03863	-0.0042488	-0.0042488	0.0714109	0.150675	0.223683	0.15016	0.15016	0.00678837	-0.369124	0	0	0	0	0	-0.0957179	-0.0957179	-0.106154	-0.0113336	0.0558629
p-MET(Y1234/1235)[15m]	0.118455	0.731998	1.01841	0.127846	0.125507	0.0207572	0.0808471	0.0513455	0.94998	0.538242	0.671609	0.705177	0.393867	1.1428	1.07939	1.19416	1.01457	0.210218	0.612612	0.632067	0.502572	0.299071	0.907267	0.970476	0.8283	1.13501	0.301989	1.10937	1.01402	0.78385	0.795612
p-IGF1RB (Y1135/1136) /…[05m]	0.347765	0.532226	0.640581	0.684361	0.739711	0.784038	1.26659	0.119395	0.256011	0.179985	0.203464	0.185436	0.130386	0.718969	0.760699	0.547045	0.415443	0.302913	0.444899	0.437188	0.293017	0.352321	0.790265	0.807032	0.635875	0.683402	0.186534	0.543039	0.57486	0.38596	0.4425
p-PYK2(Y402)[05m]	-0.0182546	0.267726	0.291467	0.0152872	-0.0280984	0.000254342	0.0124247	0.256306	0.629266	0.338601	0.488502	0.474828	0.25418	0.990188	1.06967	1.02669	0.92253	0.118097	0.762479	0.783437	0.829386	0.233687	0.914797	0.936135	0.817995	0.972072	0.138777	0.690091	0.675923	0.477858	0.762102
p-ERK(T202/Y204)[00m]	-0.193564	-0.193564	-0.193564	-0.193564	-0.193564	-0.193564	-0.193564	0.0748006	0.0748006	-0.192506	0.114683	-0.13972	-0.154016	-0.154016	-0.135107	-0.0641629	-0.040018	0.30561	0.30561	0.192942	0.249458	0.0270668	0.0270668	0.173244	0.0640838	0.126572	-0.195813	-0.195813	-0.019896	-0.10424	-0.0737572
p-KIT(C-)(Y719)[05m]	-0.105951	0.233151	0.22183	-0.114997	-0.0577655	-0.125768	-0.1719	0.0999542	0.407281	0.212491	0.242706	0.32856	0	0	0	0	0	0.135869	0.387028	0.465841	0.527554	-0.120465	0.679425	0.857403	0.674401	0.766207	0.0161055	0.789327	0.860545	0.505147	0.86093
p-STAT6(Y641)[15m]	0.431193	0.526851	0.558931	0.399566	0.402841	0.439715	0.587143	0.020797	0.828101	0.25628	0.481132	0.502667	0.548687	1.13884	1.30292	1.47842	1.41572	0.137114	0.951409	1.00265	1.08619	0.502852	1.43035	1.38583	1.23834	1.58944	0.414909	1.34807	1.21971	1.05612	1.10359
p-STAT6(Y641)[05m]	0.124131	0.414818	0.522641	0.622317	0.585459	0.551572	0.494771	0.00655143	0.696071	0.25824	0.439838	0.649781	0.696325	1.37811	1.42414	1.36618	1.20543	0.530533	1.25802	1.0565	1.13789	0.322591	1.32179	1.36518	1.16989	1.32275	0.395824	1.29574	1.34252	1.23588	1.40231
p-MEK(1/2)(S217/221)[15m]	-0.481686	-0.0910478	0.129854	0.206671	0.230718	-0.521452	-0.323741	-0.0892354	0.212837	0.125078	0.088505	0.0391163	-0.101639	0.287374	0.147893	0.221592	0.429521	0.308009	0.522661	0.398057	0.819806	-0.207826	-0.0404559	0.159326	0.0375197	0.312854	-0.00357864	0.462613	0.485791	0.276115	0.208809
p-PKCD(T505)[15m]	0.515137	0.443954	0.426343	0.339448	0.323013	0.405915	0.591306	0	0	0	0	0	0.372848	0.469429	0.513385	0.553476	0.560921	0.549607	0.479354	0.682177	0.667215	0.524721	0.578741	0.550159	0.466209	0.749067	0.400929	0.508364	0.452097	0.265158	0.253683
p-SRC(Y416)[05m]	-0.0438665	0.00342557	-0.041569	-0.0765955	0.0889282	-0.0360724	0.0207571	-0.0692167	0.870999	0.534289	0.581461	0.694382	0.194399	1.05631	1.12859	1.12701	1.0725	0.441278	0.468728	0.520825	0.509465	0.0463356	0.76182	0.920168	0.674767	0.949359	0.303397	0.671057	0.485121	0.524815	0.639806
p-EGFR(Y1173)[15m]	0.0990178	0.777197	0.964596	-0.155764	0.0873281	0.00587946	-0.0141223	0.127156	0.91524	0.775456	0.832814	0.791012	0.343845	1.1237	0.992664	0.919261	0.955055	0.384758	0.60753	0.55903	0.541213	0.0602511	0.774637	0.893164	0.691738	1.05253	0.329274	0.955024	0.728477	0.789123	0.849798
p-S6RIBPROT(S240/244)[05m]	0.166751	0.388932	0.467881	0.432049	0.519993	0.386393	0.49168	0.12184	0.0438356	-0.298873	-0.159077	-0.455459	1.04285	1.03976	1.08482	0.958203	0.829314	0.825194	0.797418	0.745529	0.605597	0.0351355	0.125518	0.313899	-0.0610007	0.387231	0.516788	0.699379	0.633481	0.66844	0.830225
p-FGFR1(Y653/654)[15m]	0.0938795	0.395901	0.614301	0.149989	0.0485702	0.0954378	0.397273	0.0241862	0.706177	0.261624	0.42061	0.430002	0.182326	0.871792	0.86738	0.966991	0.969112	0.0134144	0.303102	0.35989	0.235668	0.22774	0.947253	0.998701	0.802563	1.20951	0.40378	0.994047	0.867725	0.688197	0.765891
p-GAB1(Y627)[00m]	-0.0844973	-0.0844973	-0.0844973	-0.0844973	-0.0844973	-0.0844973	-0.0844973	-0.00886085	-0.00886085	-0.0902263	0.0885127	-0.0161462	0.136143	0.136143	0.233512	0.235856	0.194799	0.100688	0.100688	0.193304	0.0212457	-0.171917	-0.171917	-0.112007	-0.210156	-0.0642162	-0.0324181	-0.0324181	0.0826344	0.11101	0.179534
p-P38MAPK(T180/Y182)[05m]	-0.369143	-0.250381	0.047127	0.299346	0.305735	0.346497	0.163393	0.238934	0.393223	0.0473374	0.17059	0.288402	0.594382	0.619484	0.660929	0.711753	0.412341	0.81931	1.02439	0.942819	0.702004	0.31188	0.461758	0.53028	0.0731818	0.344814	0.73423	1.05125	1.04654	0.690032	1.06313
p-FOXO3A(S253)[05m]	0.00754983	0.0928373	0.221593	0.487345	0.461224	0.470562	0.39136	0.017686	0.0897494	0.104532	0.184567	0.124552	0.4097	0.442046	0.505729	0.345315	0.358069	0.466123	0.612938	0.602177	0.339605	0.33011	0.377956	0.390657	0.277213	0.168629	0.501112	0.696026	0.867956	0.737306	0.81697
p-SAPK/JNK(T183/Y185)[00m]	-0.179012	-0.179012	-0.179012	-0.179012	-0.179012	-0.179012	-0.179012	0.0188871	0.0188871	-0.0215781	0.0758653	0.0760137	0.0644654	0.0644654	0.111941	0.150182	0.188881	0.181849	0.181849	0.231611	0.355854	-0.0831768	-0.0831768	-0.136751	-0.129082	-0.0849965	-0.0927243	-0.0927243	-0.156241	-0.277578	-0.113
p-RAF(C-)(S259)[15m]	0.226559	0.0908801	0.148647	0.151908	0.189436	0.265209	0.412701	0.189036	0.349207	0.211764	0.212128	0.245967	0.494527	0.476527	0.525245	0.484638	0.399689	-0.141724	-0.266449	-0.146591	0.0897041	0.503797	0.484132	0.51095	0.508875	0.444897	0.368201	0.427213	0.394829	0.320634	0.213138
p-SHP2(Y542)[05m]	0.0571016	0.311354	0.364922	0.181617	0.198203	0.097629	0.186441	0.0107616	0.670165	0.287781	0.40311	0.546017	0.644939	1.01058	1.05178	1.11273	0.897449	0.462718	1.14048	1.24446	1.40071	0.0497986	0.978679	1.0907	0.891182	1.15499	0.344048	0.901445	0.779137	0.671596	0.876002
p-IGF1RB (Y1135/1136) /…[15m]	0.677044	0.633479	0.68372	0.593336	0.619357	0.64214	1.26872	0.00122938	0.423508	0.110915	0.214922	0.217106	0.128588	0.351204	0.55406	0.62533	0.802636	0.357503	0.358761	0.499385	0.408566	0.503924	0.77687	0.753291	0.651331	0.899324	0.126117	0.397967	0.336982	0.364135	0.386016
p-CDK2(T160)[00m]	0.129325	0.129325	0.129325	0.129325	0.129325	0.129325	0.129325	-0.00895246	-0.00895246	-0.0225366	0.0522047	0.128374	0.696077	0.696077	0.773952	0.612142	0.665002	0.682512	0.682512	0.427399	0.479071	0	0	0	0	0	1.04834	1.04834	1.1223	1.08421	1.16445
p-PDGFRB(Y1009)[05m]	0.142861	0.447177	0.47468	0.107135	0.148554	0.118492	0.157273	0.017012	0.397257	0.0857452	0.213501	0.247834	0.198672	0.747165	0.839242	0.781518	0.956755	0.196088	1.05508	1.0506	1.19458	0.0235129	0.323157	0.362655	0.279818	0.436258	0.156636	0.905829	0.851126	0.650469	0.909922
p-FOXO3A(S253)[15m]	0.245246	0.235498	0.284492	0.212116	0.224767	0.228281	0.392698	0.249113	0.432312	0.224876	0.281959	0.16929	0.36411	0.428771	0.562963	0.497784	0.514037	0.394908	0.362823	0.502908	0.445338	0.220286	0.181477	0.342927	0.353542	0.353533	0.497659	0.609122	0.675295	0.513247	0.455898
p-KIT(C-)(Y719)[00m]	-0.150374	-0.150374	-0.150374	-0.150374	-0.150374	-0.150374	-0.150374	0.0382648	0.0382648	0.0281522	0.0938654	0.0714236	0	0	0	0	0	0.0448745	0.0448745	0.210594	0.0215555	-0.169387	-0.169387	-0.281156	-0.272372	-0.242543	-0.0227642	-0.0227642	0.0238362	0.0801973	0.137103
p-FAK(Y576/577)[05m]	-0.0362124	0.205412	0.32657	0.122815	0.193362	0.103426	0.074936	-0.0318825	0.0309131	0.038742	0.0743106	0.0399114	0.261414	0.918618	0.947558	0.946692	0.871311	0.2116	0.657332	0.489246	0.540851	0.258911	0.984998	1.05277	1.02421	0.945345	0.476094	1.27887	1.29131	1.07584	1.19811
p-IGF1RB (Y1135/1136) /…[00m]	0.517486	0.517486	0.517486	0.517486	0.517486	0.517486	0.517486	0.0385466	0.0385466	0.127397	0.186392	0.141124	0.109921	0.109921	0.242266	0.276087	0.281037	0.442589	0.442589	0.452733	-0.0544736	0.211704	0.211704	0.300715	0.152037	0.270345	-0.0558014	-0.0558014	0.0150289	0.00556562	0.11382
p-KIT(C-)(Y719)[15m]	-0.0833977	0.178154	0.295055	-0.0506696	-0.131195	-0.225315	-0.165437	0.028466	0.420263	0.144826	0.185358	0.183939	0	0	0	0	0	0.289402	0.428399	0.358959	0.249999	0.119374	0.746287	0.85634	0.653999	1.00075	0.0464465	0.899957	0.752941	0.540016	0.549836
p-RAF(C-)(S259)[05m]	-0.0164172	-0.0493244	0.131436	0.389958	0.466874	0.472821	0.389488	-0.101434	-0.0477765	-0.0140106	0.0163458	0.0254507	0.508417	0.472266	0.474171	0.394039	0.258206	0.00124588	0.0227471	-0.0265135	-0.0471654	0.526072	0.489435	0.49758	0.416574	0.268873	0.428333	0.545004	0.549862	0.486796	0.506088
p-ERBB4(Y1284)[15m]	0.112628	0.0985826	0.152223	-0.0620175	-0.0978539	-0.0247371	0.121094	-0.0305397	0.165198	-0.0979313	-0.0143876	-0.0486362	0.399684	0.647939	0.769636	0.675956	0.599088	-0.110069	0.00737543	0.0989389	-0.146944	0.39942	0.631342	0.756972	0.717338	0.649815	-0.0583187	0.424793	0.326728	0.156383	0.263675
p-4EBP1(S65)[05m]	0.263434	0.21396	0.0655861	0.299315	0.401712	0.352648	0.196249	0.268193	0.255196	0.0714956	0.0255128	-0.126586	0.100613	0.203452	0.270464	0.239727	0.250101	0	0	0	0	0.193374	0.0984114	0.226083	-0.210382	0.313821	0	0	0	0	0
p-MET(Y1349)[00m]	0.00743907	0.00743907	0.00743907	0.00743907	0.00743907	0.00743907	0.00743907	-0.212457	-0.212457	-0.191934	-0.276438	-0.206823	0.0943175	0.0943175	0.127357	0.0864582	0.134184	0.0348042	0.0348042	-0.00175203	-0.10893	0.0775771	0.0775771	0.127937	0.0559033	0.108449	0.0157035	0.0157035	0.0611054	-0.0176025	-0.0406624
p-ERBB4(Y1284)[05m]	0.00804301	0.0333275	0.202534	0.113112	0.102262	0.148779	0.0555225	-0.163215	-0.110227	-0.188364	-0.0303052	-0.0707299	0.226278	0.463765	0.59039	0.605962	0.5793	0.108031	0.412305	0.288711	0.256851	0.328261	0.616772	0.652781	0.656115	0.569717	0.0462892	0.653719	0.678916	0.451018	0.60484
p-SYK(Y525/526)[05m]	0.0228409	0.391637	0.466513	0.18274	0.243994	0.28786	0.284617	0.189327	0.782048	0.468953	0.598314	0.614202	0.351359	0.98865	1.15172	1.26078	1.12879	0.301883	0.460574	0.391675	0.395621	0.172142	0.980983	0.98842	0.873683	0.910333	0.118472	1.00179	1.03006	0.725565	0.985161
p-STAT3(Y705)[15m]	0.121525	0.365063	0.507753	-0.00146763	-0.0794477	0.0601785	0.178066	0.153422	0.440078	0.177405	0.211379	0.265158	0.160129	0.642135	0.812988	0.811868	0.767517	0	0	0	0	0.184686	0.681163	0.806964	0.869908	0.796001	0.122098	0.749901	0.624463	0.40975	0.591363
p-SHP2(Y542)[15m]	0.207703	0.34117	0.458752	0.354451	0.223312	0.206073	0.255608	0.0405301	0.707862	0.23022	0.382203	0.383732	0.55233	1.00378	0.957334	1.07678	0.930843	1.20359	1.35932	1.28448	1.05812	0.300737	1.13726	1.15269	1.06661	1.34232	0.330561	0.862816	0.846719	0.632268	0.714365
p-PKCD(T505)[05m]	0.16192	0.299474	0.429656	0.516323	0.659436	0.59396	0.49583	0	0	0	0	0	0.308403	0.705682	0.800547	0.669854	0.590578	0.517694	0.675662	0.695688	0.573244	0.347272	0.669485	0.676547	0.541777	0.569974	0.446355	0.674159	0.673057	0.580595	0.595893
p-ERBB2(Y1221/1222)[05m]	0.075585	0.209511	0.241296	0.288716	0.328175	0.324078	0.226148	-0.156844	0.0860965	-0.109818	-0.0877321	0.0188591	0.320897	1.011	1.35331	1.27975	1.18252	0.126667	0.410621	0.347624	0.372624	0.350804	1.03954	1.03577	0.810848	1.005	0.455817	1.04927	1.09255	0.875829	1.09741
p-PTEN(S380)[00m]	-0.0686948	-0.0686948	-0.0686948	-0.0686948	-0.0686948	-0.0686948	-0.0686948	0.0284094	0.0284094	0.00105009	0.0478459	0.0356043	0.0099103	0.0099103	0.0039399	0.0625527	0.138989	-0.0198015	-0.0198015	-0.192685	-0.0268204	-0.143439	-0.143439	-0.150957	-0.147858	-0.153253	-0.0606929	-0.0606929	0.00372998	0.104429	0.134906
p-PDGFRB(Y1009)[00m]	0.128512	0.128512	0.128512	0.128512	0.128512	0.128512	0.128512	-0.00448838	-0.00448838	-0.105773	-0.00380499	0.0109302	-0.135947	-0.135947	-0.0940322	-0.0342238	0.514716	-0.0620231	-0.0620231	0.0157231	0.00770391	-0.132602	-0.132602	-0.0724498	-0.246273	-0.0527004	0.0926869	0.0926869	0.118576	0.0713468	0.260322
p-SRC(Y416)[15m]	0.047585	-0.0425416	-0.012601	-0.0465274	-0.0735976	-0.00138492	0.0625838	0.097919	0.951268	0.497607	0.548829	0.550297	0.215041	1.06673	1.04203	1.01706	0.991334	0.527589	0.493602	0.467509	0.410505	0.0325952	0.834835	0.883238	0.701937	1.0372	0.345788	0.667124	0.673954	0.367017	0.396757
p-ZAP70(Y319)/SYK(Y352)[15m]	0.431507	0.753917	0.958017	0.24253	0.363408	0.403814	0.595039	-0.0865743	0.540085	0.11736	0.302275	0.329963	0.364951	0.955698	1.14814	1.16413	1.0119	-0.0802768	0.460295	0.43211	0.341226	0.40168	0.993298	1.13712	1.20264	1.05967	0.214277	0.976863	0.705482	0.395661	0.693189
p-FOXO1(S319)/…[05m]	-0.229102	-0.0994563	0.00867095	0.0280231	0.00941587	-0.00156309	0.0330254	0.0594339	0.0690843	0.0617332	0.0699344	-0.017333	0.232403	0.223523	0.320831	0.355494	0.3529	-0.0527649	-0.0257227	0.00302461	-0.168596	0	0	0	0	0	-0.067624	-0.126265	0.0270198	-0.177404	-0.0410107
p-STAT1(Y701)[00m]	-0.0584328	-0.0584328	-0.0584328	-0.0584328	-0.0584328	-0.0584328	-0.0584328	0.0123907	0.0123907	-0.0470537	0.0369272	0.0250789	0.0450857	0.0450857	0.1404	0.10083	0.19646	-0.0275066	-0.0275066	-0.0608679	-0.012518	-0.0692888	-0.0692888	-0.0778487	-0.0979251	-0.0536173	0.0687082	0.0687082	0.104076	0.0121174	0.0907998
p-MET(Y1349)[15m]	0.228092	0.247466	0.421035	0.303386	0.261369	0.130223	0.297361	0.648436	1.02099	0.877265	1.01365	1.13372	0.142793	0.509534	0.591758	0.597019	0.537098	-0.0461908	-0.0267678	0.0387508	0.106967	0.0966746	0.527747	0.583351	0.638501	0.581278	-0.0602222	0.161573	0.106069	0.296418	0.337693
p-GSK3A(S21)[15m]	0.405052	0.375801	0.346165	0.446621	0.515463	0.384811	0.564178	0.0671438	0.301446	0.0288984	0.130989	-0.137354	0.280096	0.202489	0.423283	0.390446	0.38497	-0.137369	-0.0702485	-0.11564	0.169609	0.348337	0.486908	0.518004	0.441742	0.601168	0.151339	0.485265	0.489863	0.448668	0.392509
p-4EBP1(T37/46)[00m]	0.117943	0.117943	0.117943	0.117943	0.117943	0.117943	0.117943	0.0038248	0.0038248	-0.259035	-0.0976829	-0.311491	-0.012183	-0.012183	-0.0812473	-0.00101531	0.0563204	-0.113865	-0.113865	-0.057787	0.0178165	-0.134487	-0.134487	-0.184858	-0.249055	-0.182693	0.127186	0.127186	0.0817057	0.172801	0.230204
p-STAT5(Y694)[05m]	-0.0832206	0.224119	0.233219	0.0327127	0.0524526	-0.0488848	0.076559	0.0402461	0.238923	0.0664084	0.179678	0.167205	0	0	0	0	0	0.151281	0.331327	0.319256	0.115227	-0.014522	0.723681	0.871331	0.627157	0.968266	0.241353	0.746527	0.640831	0.375652	0.79278
p-P70S6K(T421/S424)[05m]	0.118807	0.168717	0.22839	0.334253	0.285558	0.187125	0.186362	0.106607	0.157224	0.124272	0.155168	0.0649883	0.432357	0.424251	0.474791	0.367278	0.224471	0.154738	0.0803204	0.0973694	0.0289796	0.0498056	0.192186	0.22933	0.150111	0.08093	0.448958	0.516927	0.428555	0.159239	0.354863
p-SYK(Y525/526)[00m]	-0.120422	-0.120422	-0.120422	-0.120422	-0.120422	-0.120422	-0.120422	0.0133546	0.0133546	0.00742746	0.0799988	0.135838	-0.0130591	-0.0130591	-0.2482	0.0810673	0.391359	0.298087	0.298087	0.197846	0.0722228	0.0803259	0.0803259	0.0839341	0.251416	0.276408	0.0516815	0.0516815	0.0872641	0.225081	0.287374
p-P70S6K(T421/S424)[00m]	-0.064896	-0.064896	-0.064896	-0.064896	-0.064896	-0.064896	-0.064896	0.0334923	0.0334923	0.00591089	0.0804121	0.0607174	0.123021	0.123021	0.317645	0.271488	0.224894	0.0340022	0.0340022	-0.0502646	-0.0381693	-0.200506	-0.200506	-0.227266	-0.19534	-0.0577605	0.107264	0.107264	0.266931	0.411571	0.503227
p-CRKII(Y221)[05m]	0.0279939	0.258907	0.467403	0.605675	0.652004	0.624089	0.46107	0	0	0	0	0	0.876258	1.07371	1.08114	1.08065	0.933475	0.190013	0.424853	0.411895	0.361254	0.44504	0.632815	0.757287	0.627242	0.65778	0.340284	0.661059	0.61403	0.501456	0.60721
p-SRC(Y416)[00m]	-0.0861085	-0.0861085	-0.0861085	-0.0861085	-0.0861085	-0.0861085	-0.0861085	-0.0138167	-0.0138167	-0.0938913	0.0139492	0.0207961	0.0439812	0.0439812	0.113743	0.111674	0.22432	0.172778	0.172778	0.243972	0.290256	-0.0260412	-0.0260412	-0.0548918	0.0243034	0.0860437	0.157658	0.157658	0.227892	0.255636	0.326817
p-CRKL(Y207)[00m]	0.068907	0.068907	0.068907	0.068907	0.068907	0.068907	0.068907	-0.0555393	-0.0555393	-0.272332	0.0480913	-0.02523	0.150972	0.150972	0.152232	0.146897	0.217816	0.156131	0.156131	0.14331	0.0821895	-0.151376	-0.151376	-0.198661	-0.199342	-0.16801	0.176089	0.176089	0.151225	0.178378	0.378939
p-STAT5(Y694)[00m]	-0.0949542	-0.0949542	-0.0949542	-0.0949542	-0.0949542	-0.0949542	-0.0949542	0.0122021	0.0122021	-0.0200465	0.0380678	0.0260851	0	0	0	0	0	0.238302	0.238302	0.107724	-0.114036	-0.0880149	-0.0880149	-0.097318	-0.0880068	-0.0817136	0.0284667	0.0284667	0.151113	0.187501	0.261852
p-FGFR1(Y653/654)[00m]	-0.0839437	-0.0839437	-0.0839437	-0.0839437	-0.0839437	-0.0839437	-0.0839437	0.00702177	0.00702177	-0.0466975	0.0798172	-0.0270696	-0.00275652	-0.00275652	0.0564544	-0.0738363	0.0571062	0.0211671	0.0211671	0.144477	-0.0103791	-0.198561	-0.198561	-0.199475	-0.202514	-0.159249	0.321506	0.321506	0.332871	0.408712	0.452255
p-P90RSK(S380)[15m]	0.198023	0.235528	0.395235	0.452231	0.430849	0.23041	0.424992	0.0134295	0.133304	-0.00402763	0.068749	0.0867387	0.426489	0.460058	0.388062	0.422679	0.404701	0.619809	0.566957	0.42166	0.36486	0.262247	0.268157	0.276647	0.166914	0.412827	-0.0202602	0.300748	0.293546	0.112626	0.229372
p-STAT3(Y705)[00m]	0.143045	0.143045	0.143045	0.143045	0.143045	0.143045	0.143045	-6.99298e-05	-6.99298e-05	-0.01037	-0.00876649	0.0912152	-0.191991	-0.191991	-0.0639088	-0.0127617	0.105495	0	0	0	0	-0.178501	-0.178501	-0.0373841	-0.0116462	0.113425	0.0770768	0.0770768	0.0941414	0.0456115	0.0393301
p-4EBP1(S65)[00m]	0.297547	0.297547	0.297547	0.297547	0.297547	0.297547	0.297547	-0.0279643	-0.0279643	-0.239688	-0.0899325	-0.318484	0.10223	0.10223	0.0656283	0.0560417	0.0744052	0	0	0	0	-0.0227326	-0.0227326	-0.0973153	-0.126561	-0.0161909	0	0	0	0	0
p-ERBB4(Y1284)[00m]	0.00183193	0.00183193	0.00183193	0.00183193	0.00183193	0.00183193	0.00183193	-0.000424985	-0.000424985	-0.0432355	-0.150979	-0.172032	0.0559431	0.0559431	0.127616	0.189848	0.264685	0.100053	0.100053	0.136098	-0.00509601	0.0959215	0.0959215	0.17787	0.190299	0.304719	-0.0479203	-0.0479203	-0.0659589	-0.137138	0.00780806
p-CREB(S133)[05m]	0.270226	0.365691	0.161809	0.336079	0.235638	0.381909	0.277385	0.172145	0.233896	0.0907759	0.150109	0.148029	0.409798	0.436226	0.420457	0.451398	0.367749	0.0909883	0.149637	0.292178	0.360848	-0.0415643	0.132777	0.240075	0.0218918	0.140708	0.53567	0.644158	0.60589	0.642018	0.66233
p-IRS1(S1101)[00m]	0.169098	0.169098	0.169098	0.169098	0.169098	0.169098	0.169098	-0.138862	-0.138862	-0.181954	-0.192025	-0.136514	-0.0537907	-0.0537907	0.00844866	0.0353171	0.0824408	0.0426611	0.0426611	0.0799256	-0.010967	0.0213457	0.0213457	0.0965644	0.0912605	0.124807	0.0743784	0.0743784	0.136425	0.0624599	0.0603822
p-JAK1(Y1022/1023)[00m]	0.155264	0.155264	0.155264	0.155264	0.155264	0.155264	0.155264	-0.0626187	-0.0626187	-0.103065	-0.0671532	-0.0575162	-0.0304077	-0.0304077	0.165566	0.0507203	0.373703	0.154029	0.154029	0.156822	-0.10971	0.0628705	0.0628705	0.271133	0.116889	0.446626	-0.0116589	-0.0116589	0.0372466	-0.102422	-0.102602
p-P90RSK(S380)[05m]	0.172721	0.230204	0.284978	0.501022	0.473811	0.414282	0.388824	0.0902597	0.154885	0.0545987	0.1035	0.0367297	0.439215	0.46102	0.467436	0.411745	0.286125	0.330448	0.209168	0.249396	0.260349	-0.0096525	0.248489	0.344634	0.174119	0.312344	0.104099	0.381618	0.370799	0.076089	0.363478
p-SYK(Y525/526)[15m]	0.292819	0.371903	0.552413	0.326614	0.151337	0.129866	0.0785823	0.0832209	0.659488	0.307679	0.409591	0.35192	0.515951	1.12227	1.01546	1.28227	1.0962	0.389885	0.617358	0.479167	0.492263	0.258969	0.814024	0.859691	0.72733	1.06853	0.211064	1.01075	0.956872	0.724081	0.725394
p-PLCG1(Y783)[00m]	0.10599	0.10599	0.10599	0.10599	0.10599	0.10599	0.10599	0.00405537	0.00405537	-0.0305402	0.0664362	0.0879731	0.298971	0.298971	0.288546	0.323552	0.572819	-0.0446796	-0.0446796	0.00141418	-0.0555843	-0.155616	-0.155616	-0.154345	-0.301979	-0.0794777	-0.00125814	-0.00125814	0.00136299	0.101552	0.227251
p-CDC2(Y15)[05m]	0.0326462	0.0851577	0.165241	0.324776	0.36147	0.327789	0.199047	0.00883385	0.111363	0.0827593	0.108697	0.0610661	0.433668	0.446881	0.406656	0.389843	0.372116	0.542589	0.630851	0.48675	0.33174	0.349936	0.533799	0.582783	0.416164	0.467818	0.236103	0.403695	0.31315	0.273446	0.312446
p-P90RSK(S380)[00m]	-0.0227918	-0.0227918	-0.0227918	-0.0227918	-0.0227918	-0.0227918	-0.0227918	0.0151295	0.0151295	-0.0456805	0.0535814	-0.00745115	0.242295	0.242295	0.197453	0.167488	0.153361	0.300622	0.300622	0.242954	0.0586301	-0.172228	-0.172228	-0.185221	-0.126415	-0.137431	-0.0230185	-0.0230185	0.0271308	-0.0192297	0.0890014
p-PI3KP85(Y458)P55(Y199)[00m]	-0.107684	-0.107684	-0.107684	-0.107684	-0.107684	-0.107684	-0.107684	0.0175111	0.0175111	-0.0396433	0.0921477	0.0302849	0.216221	0.216221	0.289333	0.222386	0.204693	0.104151	0.104151	0.137067	0.358875	-0.129081	-0.129081	-0.248235	-0.206719	-0.263969	0.0791617	0.0791617	0.213423	0.291722	0.40018
p-CRKII(Y221)[00m]	-0.0425241	-0.0425241	-0.0425241	-0.0425241	-0.0425241	-0.0425241	-0.0425241	0	0	0	0	0	0.357007	0.357007	0.513204	0.526296	0.660887	0.0780637	0.0780637	0.109743	-0.0236143	0.0492461	0.0492461	0.150097	0.0718039	0.266943	0.113408	0.113408	0.254426	0.198781	0.256359
p-CRKII(Y221)[15m]	0.292279	0.450838	0.54204	0.341026	0.33841	0.267288	0.482932	0	0	0	0	0	0.869569	0.815495	0.845149	0.92658	0.918904	0.204504	0.146209	0.247346	0.148811	0.53108	0.774239	0.71454	0.552001	0.842766	0.304974	0.61548	0.547925	0.340967	0.401661
p-GAB2(S159)[00m]	0.322133	0.322133	0.322133	0.322133	0.322133	0.322133	0.322133	0.0196892	0.0196892	0.0800019	0.0897425	0.155424	0.0142727	0.0142727	0.0147086	0.0635194	0.0914353	-0.05239	-0.05239	-0.0810665	-0.114823	0.015212	0.015212	0.039297	0.0350657	0.0574033	0.162058	0.162058	0.252477	0.203942	0.238187
p-SHC(Y239/240)[05m]	0.0150292	0.11192	0.266486	0.328147	0.342165	0.274298	0.253213	0.119819	0.360591	0.174948	0.33512	0.372376	0.315352	0.275975	0.307616	0.251731	0.178277	0.482218	0.817292	0.688966	0.677677	0.320567	0.312179	0.262412	0.217028	0.143399	0.00338944	0.447751	0.457468	0.354104	0.418956
p-SRC(Y527)[00m]	0.00805841	0.00805841	0.00805841	0.00805841	0.00805841	0.00805841	0.00805841	-0.0393847	-0.0393847	-0.167548	0.0123615	0.041355	0.0724287	0.0724287	0.0459982	0.0937144	0.109404	0.269192	0.269192	0.217805	0.239683	-0.0965449	-0.0965449	-0.179021	-0.117128	-0.115624	0.129314	0.129314	0.165274	0.188812	0.276252
p-IRS1(S1101)[05m]	0.124013	0.233581	0.367585	0.437352	0.508922	0.444165	0.384542	-0.0479364	0.0503206	0.0738031	0.132506	0.00937786	0.106116	0.0946887	0.185026	0.119785	0.0997115	0.0800348	0.185397	0.0824239	0.169297	0.229016	0.218415	0.266795	0.237842	0.202512	0.105084	0.402467	0.470802	0.295652	0.403502
p-S6RIBPROT(S240/244)[00m]	-0.0757974	-0.0757974	-0.0757974	-0.0757974	-0.0757974	-0.0757974	-0.0757974	-0.130119	-0.130119	-0.46594	-0.362655	-0.453089	0.857115	0.857115	1.20135	0.788743	0.652579	-0.0928017	-0.0928017	-0.269086	0.459456	-0.0623892	-0.0623892	-0.256795	-0.0985467	-0.108228	0.322678	0.322678	0.430063	0.558922	0.6274
p-PYK2(Y402)[15m]	-0.0473107	0.172214	0.416154	0.0819014	0.0580775	-0.0154112	0.0583972	0.169594	0.56829	0.242494	0.392845	0.367737	0.417835	0.96077	0.912796	0.962066	0.813898	0.607174	0.816541	0.751064	0.713981	0.336281	0.776397	0.814394	0.697296	0.931227	0.316347	0.823564	0.77419	0.398434	0.476153
p-ABL(C-)(Y245)[00m]	0	0	0	0	0	0	0	0	0	0	0	0	0.0134021	0.0134021	0.0329848	0.0210961	0.106765	0.00067523	0.00067523	0.00122458	-0.245983	0.0907676	0.0907676	0.190078	0.0868526	0.167457	0.114334	0.114334	0.177432	0.1985	0.288095
p-PDGFRA(Y754)[15m]	0.521202	0.533344	0.545664	0.381508	0.456604	0.432825	0.549173	0.0407591	0.744982	0.0487624	0.330509	0.371464	0.506921	0.534103	0.574033	0.447566	0.439239	0.0268408	0.347231	0.461848	0.544278	0.377694	0.730937	0.817084	0.738684	0.921388	0.223976	0.404164	0.292854	0.205254	0.209927
p-EGFR(Y1173)[00m]	0.258129	0.258129	0.258129	0.258129	0.258129	0.258129	0.258129	0.0492575	0.0492575	0.0853961	0.13806	0.173844	0.143682	0.143682	-0.113829	-0.0399116	0.193624	0.13713	0.13713	0.220147	0.0466172	0.00562358	0.00562358	0.0186416	0.0343389	0.102447	0.251871	0.251871	0.17131	0.429084	0.540155
p-EGFR(Y845)[00m]	0.162721	0.162721	0.162721	0.162721	0.162721	0.162721	0.162721	0.0145107	0.0145107	-0.286029	0.0675497	0.0639895	-0.0578812	-0.0578812	-0.0300525	0.0547604	0.349025	0.0703628	0.0703628	0.112603	-0.0671251	0.027676	0.027676	-0.0295759	-0.017699	0.034453	0.296797	0.296797	0.279495	0.267177	0.500787
p-ZAP70(Y319)/SYK(Y352)[05m]	0.068972	0.459641	0.634638	0.472851	0.550864	0.582751	0.466069	-0.256095	0.189421	-0.204679	0.121734	0.129858	0.355741	0.785375	0.850034	0.82214	0.682906	0.0919399	0.588899	0.40328	0.255486	0.377537	0.851994	0.925921	0.911113	0.75307	0.261992	0.877567	0.747726	0.542988	0.833694
p-PTEN(S380)[15m]	0.0895155	0.135491	0.271582	0.221912	0.194559	0.301509	0.206248	0.0626443	0.161913	0.128446	0.113937	0.0910668	0.00218422	0.0245334	-0.0412742	-0.0413756	-0.0881156	0.245168	0.418731	0.384755	0.609104	-0.108194	-0.175169	0.0166423	-0.0652002	0.0622679	0.0846473	0.106658	0.0803972	0.023719	-0.148898
p-CREB(S133)[00m]	0.0675344	0.0675344	0.0675344	0.0675344	0.0675344	0.0675344	0.0675344	0.0965989	0.0965989	-0.0460052	0.0416431	0.0123314	0.0558748	0.0558748	0.079522	0.191662	0.268535	-0.0104946	-0.0104946	0.00192687	-0.110112	-0.149001	-0.149001	-0.209909	-0.282453	-0.254085	0.210316	0.210316	0.323117	0.373173	0.448988
p-SHP2(Y542)[00m]	-0.0347842	-0.0347842	-0.0347842	-0.0347842	-0.0347842	-0.0347842	-0.0347842	-0.0384012	-0.0384012	-0.0611998	0.0143126	-0.0108777	0.254461	0.254461	0.40797	0.25807	0.413902	0.239293	0.239293	0.24277	0.234154	-0.109312	-0.109312	-0.136784	-0.239881	-0.0760345	0.226289	0.226289	0.336726	0.309084	0.375758
p-FOXO1(S319)/…[15m]	-0.0648365	-0.101661	0.0092342	0.000841427	-0.0664982	-0.137827	0.0284261	-0.0562024	0.0241076	-0.0230836	0.00873639	0.0168644	0.343412	0.303904	0.246405	0.242866	0.247722	0.366981	0.294477	0.218922	0.150105	0	0	0	0	0	-0.0202969	0.0511128	0.0450812	-0.0525789	-0.215079
p-PDGFRA(Y754)[05m]	0.1707	0.336236	0.414532	0.504319	0.592964	0.576723	0.530078	0.0194084	0.451677	0.159573	0.433679	0.446858	0.363956	0.457786	0.548555	0.55821	0.529786	0.155864	0.676282	0.619334	0.613941	0.281878	0.667057	0.707773	0.436117	0.586413	0.30823	0.502272	0.532631	0.376986	0.454929
p-MTOR(S2448)[00m]	0.0209797	0.0209797	0.0209797	0.0209797	0.0209797	0.0209797	0.0209797	-0.0872881	-0.0872881	-0.0903591	-0.0976896	-0.0469546	0.0619762	0.0619762	0.125347	0.096346	0.16213	0.249614	0.249614	0.156125	0.105092	0.0804441	0.0804441	0.152958	0.105347	0.177301	0.115889	0.115889	0.142295	0.126696	0.317916
p-ERBB2(Y1221/1222)[15m]	0.215207	0.268246	0.31154	0.0600479	0.101343	0.0684334	0.162134	-0.167234	0.167454	-0.207264	-0.0327018	-0.0604368	0.953033	1.17326	1.17451	1.16362	1.1282	0.0745233	0.170707	0.223916	0.270682	0.452053	1.07477	1.00492	0.863451	1.13555	0.771244	1.04001	0.980751	0.782458	0.714638
p-PLCG2(Y759)[00m]	0.020904	0.020904	0.020904	0.020904	0.020904	0.020904	0.020904	0.00163329	0.00163329	-0.0357647	0.042073	0.0349272	0.0324572	0.0324572	0.0665725	0.125846	0.303383	0.0833023	0.0833023	0.253245	0.169234	0.0519877	0.0519877	0.00684404	-0.0997059	-0.015668	0.155928	0.155928	0.113231	0.329507	0.378433
p-PDGFRB(Y1009)[15m]	0.142472	0.412037	0.645626	0.274767	0.183504	0.200003	0.275362	-0.0168019	0.496513	0.0476145	0.210254	0.193575	0.304883	0.942431	0.783701	0.886751	0.747984	0.372682	1.05214	0.923463	0.848426	0.0466491	0.440753	0.480359	0.406059	0.670019	0.514631	0.823787	0.751965	0.546736	0.607566
p-FAK(Y576/577)[00m]	0.0960141	0.0960141	0.0960141	0.0960141	0.0960141	0.0960141	0.0960141	-0.110731	-0.110731	-0.0374591	-0.0812097	-0.0444343	0.0264492	0.0264492	0.0481864	0.0630388	0.275291	0.0582551	0.0582551	0.194537	0.129436	-0.00580023	-0.00580023	0.0358563	0.0617742	0.299832	0.268921	0.268921	0.436451	0.428219	0.520191
p-GSK3A(S21)[00m]	0.110652	0.110652	0.110652	0.110652	0.110652	0.110652	0.110652	-0.0301849	-0.0301849	-0.0981963	0.0216638	-0.0751325	0.231663	0.231663	0.277251	0.310705	0.358722	0.0830036	0.0830036	0.0595669	-0.318266	0.119438	0.119438	0.211984	0.13565	0.23322	0.150166	0.150166	0.12856	0.0133532	0.223581
p-STAT3(S727)[05m]	-0.0176931	0.162075	0.141507	0.226655	0.312363	0.304983	0.233601	0.0523443	0.051616	0.0950688	0.0847869	-0.093042	0.253373	0.220447	0.245237	0.188287	0.17929	0.0642848	0.617415	0.260659	0.373165	0.205138	0.198865	0.221777	0.143575	0.0713789	0.208867	0.360509	0.435863	0.238273	0.302697
p-4EBP1(T37/46)[15m]	-0.116809	-0.260333	-0.0979434	-0.0797396	0.136454	0.00812123	0.0494091	0.323763	0.417449	-0.0699881	0.149401	-0.245914	0.1409	0.141088	0.0741102	0.0695312	0.0891106	0.398684	0.296637	0.236499	0.142061	0.273983	0.207629	0.319503	0.206364	0.476682	0.105462	0.124266	0.00640486	-0.0643577	-0.198605
p-PDGFRA(Y754)[00m]	0.315065	0.315065	0.315065	0.315065	0.315065	0.315065	0.315065	0.011999	0.011999	0.046453	-0.00583166	0.049292	0.0769597	0.0769597	0.185199	0.24557	0.328193	0.113144	0.113144	0.0507899	-0.206651	-0.0123186	-0.0123186	0.0816909	0.0336896	0.196644	0.00231782	0.00231782	0.194122	0.244039	0.329894
p-P38MAPK(T180/Y182)[15m]	-0.254124	0.138856	0.21857	-0.0326593	0.0365989	-0.226144	0.00944601	0.0480558	0.321289	-0.0524726	0.445237	0.578072	0.435483	0.627543	0.717799	0.761748	0.649987	0.630567	0.760394	0.890585	0.946025	0.284847	0.556103	0.397802	0.15835	0.423806	0.75312	0.90588	1.09882	0.512199	0.708249
p-PKCPAN/G(T514)[00m]	0.0994399	0.0994399	0.0994399	0.0994399	0.0994399	0.0994399	0.0994399	0.0265714	0.0265714	0.0175277	0.0840076	0.0508428	0.861657	0.861657	1.06629	0.850703	0.673506	0.678773	0.678773	0.3796	0.169239	-0.0994248	-0.0994248	0.00489054	-0.0983496	-0.0533659	0.464919	0.464919	0.637499	0.633223	0.761195
p-ZAP70(Y319)/SYK(Y352)[00m]	0.202059	0.202059	0.202059	0.202059	0.202059	0.202059	0.202059	-0.054808	-0.054808	0.126731	-0.0707692	-0.270816	0.102528	0.102528	0.179313	0.1857	0.251617	0.20052	0.20052	0.150039	-0.0786282	0.125094	0.125094	0.217832	0.1979	0.275506	0.0844081	0.0844081	0.149522	0.0855304	0.196665
p-ERK(T202/Y204)[15m]	-0.377086	0.11179	0.18392	0.226292	0.319056	-0.551043	-0.233761	0.131012	0.588306	0.397126	0.375588	0.249454	0.188057	0.391981	0.343077	0.309335	0.289858	0.262402	0.517399	0.578933	0.763433	0.309468	0.737739	0.819192	0.750911	0.921927	-0.0699562	0.518786	0.40082	0.365447	0.25539
p-MET(Y1234/1235)[00m]	0.207742	0.207742	0.207742	0.207742	0.207742	0.207742	0.207742	0.00504801	0.00504801	-0.00944789	0.0539666	0.0455475	0.108666	0.108666	0.0680692	0.1478	0.267576	0.0350043	0.0350043	0.159249	-0.0660699	0.0656093	0.0656093	-0.0852644	-0.0959411	0.0471471	0.21173	0.21173	0.154294	0.39993	0.456003
p-MEK(1/2)(S217/221)[05m]	-0.487978	0.285555	0.36243	0.409215	0.428406	0.0358089	0.0019465	0.33895	0.592799	0.286538	0.115214	0.47485	0.198337	0.579605	0.557855	0.590152	0.370535	0.294651	0.584087	0.604537	0.873901	0.248504	0.44364	0.569841	0.326667	0.434785	0.24719	0.741648	0.684277	0.565095	0.736662
p-RAF(C-)(S338)[00m]	0.115132	0.115132	0.115132	0.115132	0.115132	0.115132	0.115132	0.0395939	0.0395939	0.00133555	-0.0171351	-0.00886799	0.422382	0.422382	0.550392	0.420129	0.406233	0.265756	0.265756	0.137336	0.0439196	0.425308	0.425308	0.589122	0.41767	0.438627	0.325556	0.325556	0.489986	0.326865	0.455307
p-SAPK/JNK(T183/Y185)[15m]	0.116015	0.169749	0.246862	0.119851	0.0735501	-0.0269212	-0.000914353	-0.0727474	0.0548402	-0.0593415	0.124805	0.143505	0.263715	0.227402	0.149504	0.166321	0.15853	0.717283	0.845206	0.711828	0.808668	0.0285044	0.115808	0.295977	0.076186	0.351285	-0.322683	-0.0738814	0.145129	-0.131382	-0.0148218
p-STAT3(S727)[00m]	0.163928	0.163928	0.163928	0.163928	0.163928	0.163928	0.163928	0.000883289	0.000883289	0.0308576	0.0292429	0.100626	0.100252	0.100252	0.179627	0.13238	0.168416	0.112922	0.112922	0.0643629	-0.102208	0.0882694	0.0882694	0.18756	0.0981351	0.119835	0.0275349	0.0275349	0.146306	0.0827633	0.132791
p-P70S6K(T421/S424)[15m]	-0.00580426	0.118787	0.240175	0.292981	0.284522	0.0949172	0.150334	0.0284959	0.12617	0.0361724	0.085103	0.062688	0.601363	0.357733	0.318519	0.515582	0.49957	0.10835	0.17947	0.0770533	0.245168	0.0394291	-0.252869	-0.278818	-0.156712	0.188509	0.153577	0.402882	0.275334	0.123516	0.24427
p-PDK1(S241)[00m]	0.177189	0.177189	0.177189	0.177189	0.177189	0.177189	0.177189	0.0312315	0.0312315	0.0496817	0.0604725	0.0820662	0.322301	0.322301	0.460064	0.491754	0.546913	0.388175	0.388175	0.00180558	0.139849	0.168802	0.168802	0.293782	0.198739	0.358475	0.248096	0.248096	0.347694	0.267052	0.420462
p-STAT3(S727)[15m]	0.141863	0.0194095	0.00732635	-0.0858841	0.00448892	0.107986	0.287513	-0.032208	0.135871	0.00567714	0.0506936	0.0386413	0.17244	0.189998	0.316857	0.197617	0.17268	-0.0538811	0.296548	0.389792	0.334793	0.0672977	0.0912504	0.1908	0.111306	0.0956076	0.199706	0.293471	0.217171	0.185873	0.131086
p-PTEN(S380)[05m]	0.091822	0.110691	0.112598	0.0979463	0.0410596	-0.013178	0.13917	0.0596543	0.110923	0.0581397	0.0457289	0.00162048	0.0813324	0.0810315	0.0398777	0.0489579	0.0788934	0.196342	0.480459	0.518379	0.685505	-0.139613	-0.0247264	0.0423959	-0.105828	-0.0530598	0.0500675	0.0179621	0.0769534	0.0456302	0.0709669
p-EGFR(Y1068)[00m]	0.238414	0.238414	0.238414	0.238414	0.238414	0.238414	0.238414	0.0917902	0.0917902	0.157261	0.134306	0.147325	0.075913	0.075913	0.157419	0.16778	0.278168	0.157731	0.157731	0.133495	-0.2569	0.134277	0.134277	0.301806	0.23254	0.359328	0.0795376	0.0795376	0.0852783	0.200851	0.272244
p-EGFR(Y1086)[00m]	0.240875	0.240875	0.240875	0.240875	0.240875	0.240875	0.240875	0.00403498	0.00403498	-0.0674729	-0.0792397	0.010797	0.0912545	0.0912545	0.120826	0.116859	0.310403	0.219354	0.219354	0.311807	0.182839	0.172711	0.172711	0.263231	0.13009	0.301321	0.150255	0.150255	0.106013	0.306516	0.381805
p-IRS1(S1101)[15m]	0.368683	0.388004	0.392548	0.208422	0.15473	0.224152	0.380618	0.0112169	0.126533	0.0288345	0.106656	0.121326	0.262373	0.24308	0.327779	0.205864	0.221981	-0.0369613	-0.0283015	0.188641	0.233069	0.362416	0.268498	0.334056	0.255318	0.265256	0.0765014	0.338725	0.327559	0.263407	0.267818
p-PKCD(T505)[00m]	0.142331	0.142331	0.142331	0.142331	0.142331	0.142331	0.142331	0	0	0	0	0	-0.00768787	-0.00768787	0.0400048	0.0504372	0.192824	0.244549	0.244549	0.339722	0.297585	0.0683039	0.0683039	0.154101	0.0801822	0.210319	0.0187567	0.0187567	0.12582	0.178771	0.345201
p-PYK2(Y402)[00m]	-0.0308069	-0.0308069	-0.0308069	-0.0308069	-0.0308069	-0.0308069	-0.0308069	0.0692566	0.0692566	0.105034	0.242305	0.258577	0.0647357	0.0647357	0.16314	0.191801	0.221855	0.143667	0.143667	-0.0118116	-0.194796	0.121751	0.121751	0.0806052	0.17519	0.126118	0.12844	0.12844	0.201359	0.131149	0.223448
p-STAT3(Y705)[05m]	0.0755245	0.250131	0.381265	0.144013	0.243589	0.210516	0.122624	0.0832861	0.200832	0.126042	0.227626	0.257392	0.466367	0.676903	0.775938	0.713248	0.651167	0	0	0	0	0.2213	0.686732	0.779098	0.724181	0.651357	0.066931	0.880118	0.889368	0.593827	0.86075
p-4EBP1(T37/46)[05m]	0.0657118	0.0820271	-0.13056	-0.0100007	-0.00520271	0.0112689	-0.051101	0.350481	0.339184	-0.0855415	0.136722	-0.128049	0.0974421	0.0415725	0.0415806	0.0448058	0.114711	0.14409	-0.0158541	0.213102	0.28883	-0.0396573	0.066671	0.255092	0.174467	0.265413	0.1463	0.130889	-0.0376199	0.163325	0.128603
p-GAB1(Y627)[15m]	0.239229	0.225856	0.476664	0.468708	0.288431	0.222504	0.251102	0.170505	0.524602	0.365824	0.369256	0.330146	0.187235	0.475479	0.389225	0.439237	0.511547	0.444944	0.507836	0.57736	0.409209	0.0479803	0.465239	0.501309	0.322981	0.648213	0.0973944	0.511768	0.476561	0.309961	0.198161
p-CDC2(Y15)[00m]	0.153573	0.153573	0.153573	0.153573	0.153573	0.153573	0.153573	-0.0175113	-0.0175113	-0.0482501	0.0102866	0.0345697	0.16172	0.16172	0.143513	0.192167	0.37837	0.408746	0.408746	0.444135	0.254836	0.0842969	0.0842969	0.101394	0.0762813	0.204449	0.106413	0.106413	0.0606096	0.11789	0.16839
p-SHC(Y239/240)[00m]	0.0774536	0.0774536	0.0774536	0.0774536	0.0774536	0.0774536	0.0774536	0.0211289	0.0211289	-0.0752351	0.0517973	0.0528067	0.12985	0.12985	0.136086	0.202116	0.242412	0.487399	0.487399	0.421384	0.178915	0.122429	0.122429	0.241347	0.178664	0.234919	0.0809734	0.0809734	0.129963	0.0261157	0.00483769
p-FOXO3A(S253)[00m]	0.18784	0.18784	0.18784	0.18784	0.18784	0.18784	0.18784	-0.0123192	-0.0123192	-0.0363497	-0.0409093	-0.0453944	0.242106	0.242106	0.292017	0.21201	0.312175	0.48449	0.48449	0.421511	0.0869215	0.0223136	0.0223136	0.199635	0.233949	0.259187	0.328482	0.328482	0.375282	0.33561	0.485261
p-ERBB2(Y1221/1222)[00m]	0.158083	0.158083	0.158083	0.158083	0.158083	0.158083	0.158083	-0.145366	-0.145366	-0.18185	-0.164341	-0.146134	0.11882	0.11882	0.229458	0.33499	0.472137	0.0356068	0.0356068	0.0963918	0.024776	0.124556	0.124556	0.244951	0.18633	0.323839	0.540888	0.540888	0.572925	0.41797	0.403961
p-GAB1(Y627)[05m]	0.0236946	0.219842	0.341275	0.115642	0.232267	0.12512	0.157403	0.0856226	0.500684	0.349541	0.396329	0.330259	0.290418	0.645729	0.735034	0.655534	0.606887	0.117214	0.385498	0.621369	0.455881	0.0597508	0.447181	0.551592	0.238874	0.342047	0.0976669	0.468953	0.47742	0.39127	0.47639
p-AKT(S473)[00m]	0.18168	0.18168	0.18168	0.18168	0.18168	0.18168	0.18168	-0.066689	-0.066689	-0.363316	0.0653066	-0.534391	0.950848	0.950848	0.913251	0.814763	0.771691	0.761266	0.761266	0.409485	-0.0112212	-0.263479	-0.263479	-0.295023	-0.321787	-0.233293	0.443114	0.443114	0.502434	0.384689	0.625329
p-SRC(Y527)[15m]	-0.0447229	-0.0401965	0.0905644	0.0776144	0.0908555	0.0630819	0.0737049	0.0873	0.198185	0.046767	0.062558	0.0330745	0.130186	0.111337	0.12478	0.127558	0.103411	0.482413	0.452611	0.452567	0.447743	-0.0472226	-0.102673	0.0603884	-0.0803868	0.0940235	0.17049	0.311826	0.275416	0.149383	0.088986
p-ABL(C-)(Y245)[15m]	0	0	0	0	0	0	0	0	0	0	0	0	0.303945	0.272396	0.33026	0.239583	0.28023	-0.34778	-0.323582	-0.230602	-0.199488	0.381508	0.503601	0.465068	0.368229	0.468985	0.202539	0.283784	0.235357	0.224608	0.161294
p-CRKL(Y207)[05m]	0.127715	0.219951	0.1712	0.20292	0.172719	0.175804	0.142974	0.15265	0.25774	0.0844149	0.170669	0.164189	0.267818	0.317631	0.297376	0.284786	0.305073	0.26304	0.351153	0.431392	0.268322	9.98049e-05	0.167391	0.309794	0.0572552	0.136279	0.375319	0.529701	0.501775	0.506541	0.547107
p-4EBP1(S65)[15m]	0.18987	-0.060145	0.0432984	0.081262	0.322813	0.233122	0.293935	0.131214	0.136635	-0.0564646	0.127756	-0.224817	0.302855	0.298973	0.374946	0.309887	0.362413	0	0	0	0	0.248196	0.569863	0.630723	0.392247	0.828236	0	0	0	0	0
p-RAF(C-)(S259)[00m]	0.116142	0.116142	0.116142	0.116142	0.116142	0.116142	0.116142	-0.176044	-0.176044	-0.100815	-0.198966	-0.140898	0.26403	0.26403	0.349472	0.272275	0.28053	0.00896135	0.00896135	-0.132312	-0.171048	0.301825	0.301825	0.407126	0.285539	0.313987	0.264832	0.264832	0.352332	0.282146	0.410857
p-SHC(Y239/240)[15m]	0.25815	0.32644	0.300605	0.164039	0.110849	0.148833	0.208632	0.12402	0.572001	0.302815	0.41924	0.375304	0.267362	0.319984	0.375671	0.271987	0.310626	0.308449	0.509418	0.611697	0.658567	0.209455	0.197436	0.312035	0.334008	0.183862	0.0199714	0.39839	0.313913	0.173774	0.249574
p-JAK1(Y1022/1023)[05m]	0.0850555	0.352713	0.562236	0.549265	0.59248	0.564278	0.56792	-0.0254606	0.155408	0.0601256	0.245118	0.224688	0.341328	0.638955	0.876709	0.735804	0.805299	0.120968	0.481872	0.433795	0.382398	0.39355	0.866503	0.95576	0.872481	0.898142	-0.189868	0.588192	0.674736	0.370277	0.666069
p-PDFGRA(Y849)/…[00m]	0.16574	0.16574	0.16574	0.16574	0.16574	0.16574	0.16574	0	0	0	0	0	0.0729422	0.0729422	0.193875	0.20843	0.348778	0.412687	0.412687	0.504115	0.3757	0.109291	0.109291	0.246835	0.199706	0.376282	0.043503	0.043503	0.0433709	0.126572	0.20933
p-MET(Y1349)[05m]	-0.0796025	0.0903687	0.249671	0.514202	0.546719	0.262882	0.216514	0.295379	0.549954	0.190526	0.379108	-0.125254	0.167201	0.513069	0.541418	0.493022	0.394974	0.0516875	0.18529	0.204201	0.171679	0.1474	0.548551	0.597544	0.522429	0.426388	-0.00813038	0.360984	0.295394	0.0908552	0.189545
p-SRC(Y527)[05m]	0.0392826	0.0624311	0.00665804	0.0827163	0.0441918	0.0462078	0.0488691	0.0653857	0.114156	0.0212526	0.0993773	0.0619206	0.197531	0.208039	0.221928	0.162679	0.132087	0.406692	0.539517	0.544791	0.461244	-0.0867708	0.0218562	0.101026	-0.0109463	0.0134674	0.241137	0.22928	0.240002	0.187368	0.23622
p-SAPK/JNK(T183/Y185)[05m]	-0.11058	0.0528026	0.122676	0.0237964	0.0492225	0.0781714	0.11554	0.0951911	0.144825	0.0617493	0.133882	0.101773	0.276772	0.282262	0.27586	0.234847	0.176267	0.571724	0.603464	0.659738	0.622726	0.100199	0.207219	0.19776	0.148655	0.337351	-0.0868629	-0.143548	-0.0438386	-0.0938658	-0.108839
p-MTOR(S2448)[05m]	-0.101813	-0.116917	0.045956	0.0933216	0.179114	0.152994	0.0524986	-0.0179156	0.073216	0.0905677	0.185981	0.111442	0.272747	0.23689	0.334109	0.213894	0.201813	0.333528	0.536594	0.441902	0.437159	0.308517	0.300778	0.347249	0.267954	0.254822	0.335082	0.667127	0.616567	0.449594	0.595229
p-ABL(C-)(Y245)[05m]	0	0	0	0	0	0	0	0	0	0	0	0	0.134046	0.170821	0.169196	0.0480908	0.241061	-0.111686	0.0105162	-0.170431	-0.115056	0.300487	0.482008	0.607481	0.323786	0.352316	0.243539	0.469646	0.432293	0.375451	0.393326
p-STAT6(Y641)[00m]	0.195238	0.195238	0.195238	0.195238	0.195238	0.195238	0.195238	-0.0153007	-0.0153007	-0.0514291	-0.0141403	-0.00857805	0.0428172	0.0428172	0.237312	0.229381	0.529754	0.464397	0.464397	0.500686	0.314907	0.173981	0.173981	0.246987	0.144435	0.242511	0.176096	0.176096	0.204258	0.335463	0.538559
p-PI3KP85(Y458)P55(Y199)[15m]	0.08122	0.171804	0.304597	0.301772	0.204552	0.21963	0.26376	0.013606	0.192349	-0.06308	0.071491	0.0666526	0.427403	0.63765	0.577895	0.709327	0.586117	0.555806	0.483938	0.351123	0.294774	-0.0944104	0.0576653	0.0784683	-0.0165225	0.205725	0.468263	0.686558	0.670898	0.462636	0.371095
p-JAK1(Y1022/1023)[15m]	0.551247	0.598806	0.611517	0.460924	0.311551	0.376454	0.378738	0.0832753	0.332006	0.00643984	0.115363	0.0982914	0.377738	0.880747	1.01317	0.943752	0.839283	0.0830231	0.266823	0.379244	0.219523	0.407791	0.980424	1.07309	1.04226	0.913253	0.0905472	0.516335	0.436794	0.26395	0.369283
p-CRKL(Y207)[15m]	0.0242228	0.0673006	0.22296	0.170558	0.25879	0.108362	0.18496	-0.0154445	0.136728	-0.015051	0.115737	0.0545238	0.19259	0.385838	0.294163	0.318065	0.387619	0.350769	0.365473	0.4033	0.169859	-0.0739388	0.0529854	0.204004	-0.00470669	0.134058	0.355885	0.629904	0.536687	0.348802	0.30665
p-STAT5(Y694)[15m]	0.037978	0.189526	0.387277	0.161628	0.0654098	0.0869748	0.102214	-0.0224972	0.309794	0.0029818	0.127086	0.138579	0	0	0	0	0	0.42812	0.442084	0.283258	0.342894	0.26536	0.954885	0.846553	0.576437	1.08627	0.259228	0.781827	0.72485	0.360949	0.506733
p-CDC2(Y15)[15m]	0.177086	0.113124	0.13584	0.0268754	0.143451	0.0366122	0.174507	-0.149549	0.320932	-0.00979823	0.114409	0.213857	0.359882	0.359342	0.45967	0.45319	0.381911	0.165063	0.29981	0.357709	0.327291	0.427495	0.663295	0.621166	0.500065	0.712287	0.165012	0.272293	0.269604	0.27545	0.251113
p-CREB(S133)[15m]	-0.122055	0.182574	0.318474	0.255422	0.432345	0.134266	0.0961952	0.00790399	0.12818	3.93355e-05	0.145592	0.0502332	0.176756	0.555781	0.547817	0.565897	0.525424	0.266669	0.491256	0.510704	0.459587	-0.00310698	-0.000631842	0.133427	-0.060826	0.0528682	0.435188	0.731192	0.671044	0.444127	0.363183
p-PI3KP85(Y458)P55(Y199)[05m]	0.0599276	0.176065	0.235009	0.245656	0.272962	0.176822	0.216769	0.0671848	0.287916	0.126775	0.262291	0.191442	0.308975	0.69055	0.729962	0.714306	0.578276	0.480767	0.512942	0.491824	0.647237	-0.220197	0.107732	0.185286	0.023459	0.11957	0.38989	0.577631	0.633697	0.406742	0.624455
p-MTOR(S2448)[15m]	0.0465764	0.0295771	0.0596348	-0.142833	-0.0754123	-0.145164	0.0728627	0.113401	0.394902	0.178295	0.236264	0.29328	0.302936	0.318542	0.437263	0.3666	0.435382	0.190146	0.206105	0.324018	0.413257	0.307964	0.319389	0.399616	0.42844	0.466103	0.244179	0.467296	0.352888	0.27528	0.343187
Cell Viability in Comparison to Media Alone (24 Hr)	1	0.350854	0.33	0.919591	1.1047	0.701603	0.788482	1	0.328758	0.972694	0.151439	0.281132	1	0.328758	0.302386	0.1225	0.0248	1	0.3752	0.036	0.5821	1	0.2936	0.263548	0.152621	0.045	1	0.293593	0.316928	0.442933	0.301224
Cell Viability in Comparison to Media Alone (StErr)	0.0489	0.0388	0.0463	0.0938	0.0151	0.0179	0.0741	0.0368	0.0818	0.1053	0.0044	0.0132	0.0368	0.0818	0.0988	0.0825	0.0248	0.0957	0.2072	0.031995	0	0.1515	0.018123	0.0377	0.038451	0.0698	0.0417	0.018123	0.0377	0.09739	0.03604
