# Supplementary material for: The DIONESUS algorithm provides scalable and accurate reconstruction of dynamic phosphoproteomic networks to reveal new drug targets
Source: Royal Society of Chemistry journal article supplement (doi:10.1039/c5ib00065c), 2015-01-01
Supplement: c5ib00065c9.xlsx [file c5ib00065c9.xlsx]

## Sheet: Sheet1
Table 4: Pearson correlation coefficients
	Variable association with viability: In order of highest absolute value of Pearson Correlation Coefficient (R)			Variable association with viability: In order of highest Pearson Correlation Coefficient (R)			Correlation Matrix (Pearson Correlation Coefficients between variables (R))
	Metric	R		Metric	R		Metric	p-4EBP1(S65)[00m]	p-4EBP1(S65)[05m]	p-4EBP1(S65)[15m]	p-4EBP1(T37/46)[00m]	p-4EBP1(T37/46)[05m]	p-4EBP1(T37/46)[15m]	p-ABL(C-)(Y245)[00m]	p-ABL(C-)(Y245)[05m]	p-ABL(C-)(Y245)[15m]	p-AKT(S473)[00m]	p-AKT(S473)[05m]	p-AKT(S473)[15m]	p-CDC2(Y15)[00m]	p-CDC2(Y15)[05m]	p-CDC2(Y15)[15m]	p-CDK2(T160)[00m]	p-CDK2(T160)[05m]	p-CDK2(T160)[15m]	p-CREB(S133)[00m]	p-CREB(S133)[05m]	p-CREB(S133)[15m]	p-CRKII(Y221)[00m]	p-CRKII(Y221)[05m]	p-CRKII(Y221)[15m]	p-CRKL(Y207)[00m]	p-CRKL(Y207)[05m]	p-CRKL(Y207)[15m]	p-EGFR(Y1068)[00m]	p-EGFR(Y1068)[05m]	p-EGFR(Y1068)[15m]	p-EGFR(Y1086)[00m]	p-EGFR(Y1086)[05m]	p-EGFR(Y1086)[15m]	p-EGFR(Y1173)[00m]	p-EGFR(Y1173)[05m]	p-EGFR(Y1173)[15m]	p-EGFR(Y845)[00m]	p-EGFR(Y845)[05m]	p-EGFR(Y845)[15m]	p-ERBB2(Y1221/1222)[00m]	p-ERBB2(Y1221/1222)[05m]	p-ERBB2(Y1221/1222)[15m]
	p-EGFR(Y1086)[05m]	-0.863216		p-GAB2(S159)[05m]	0.357884		p-4EBP1(S65)[00m]	1	0.708317	0.422098	0.813045	0.10304	-0.0270002	0.0960003	-0.194752	-0.0281537	0.140417	0.537971	0.520567	0.503915	0.165951	-0.074005	-0.28689	0.229009	0.332882	0.266563	0.372958	-0.0617714	-0.381953	0.302955	0.372673	0.444554	0.0947352	0.0720891	0.62934	-0.564762	-0.573675	0.762712	-0.649483	-0.651456	0.613182	-0.46956	-0.502974	0.523736	-0.409743	-0.336478	0.254015	-0.273504	-0.250926
	p-EGFR(Y1086)[15m]	-0.856754		p-GAB2(S159)[15m]	0.316024		p-4EBP1(S65)[05m]	0.708317	1	0.677415	0.587266	0.527914	0.442281	0.3933	0.0289165	0.235374	-0.172893	0.331739	0.303415	0.324608	0.15855	-0.0943455	-0.501982	-0.138506	-0.030269	0.327521	0.286087	-0.226976	-0.0550336	0.133046	0.191749	0.0830252	0.147839	-0.179101	0.733646	-0.36647	-0.268543	0.541883	-0.607555	-0.560262	0.443544	-0.336919	-0.373751	0.309766	-0.498606	-0.279378	-0.0863918	-0.424881	-0.410251
	p-STAT1(Y701)[05m]	-0.851694		p-PDK1(S241)[15m]	0.293986		p-4EBP1(S65)[15m]	0.422098	0.677415	1	0.170811	0.371007	0.546642	0.381026	0.317542	0.559259	-0.266891	0.0372472	0.0104469	0.135016	0.320187	0.415435	-0.618938	-0.464238	-0.384934	-0.20114	-0.172763	-0.557988	0.181944	0.313024	0.471623	-0.285579	-0.3587	-0.432415	0.509163	-0.283605	-0.112798	0.309373	-0.462008	-0.307212	0.0154755	-0.392658	-0.366332	-0.00550371	-0.493808	-0.287973	-0.0515966	-0.0671288	0.0548759
	p-MET(Y1234/1235)[05m]	-0.844553		p-4EBP1(S65)[00m]	0.288788		p-4EBP1(T37/46)[00m]	0.813045	0.587266	0.170811	1	0.281793	-0.0883904	0.196146	-0.0486028	-0.0325171	0.160505	0.587492	0.461056	0.216653	-0.145352	-0.373953	0.0745405	0.502077	0.60298	0.673592	0.759277	0.13263	-0.406803	0.112428	0.107667	0.61752	0.509933	0.25573	0.463038	-0.486074	-0.508903	0.638414	-0.547161	-0.610279	0.753278	-0.354618	-0.421673	0.755107	-0.352558	-0.367366	0.413908	-0.208732	-0.207668
	p-MET(Y1234/1235)[15m]	-0.840251		p-4EBP1(S65)[05m]	0.245369		p-4EBP1(T37/46)[05m]	0.10304	0.527914	0.371007	0.281793	1	0.714055	0.307179	0.0415617	0.064115	-0.223381	0.0747932	0.0739041	0.13951	-0.0421489	-0.20156	-0.219393	-0.177923	-0.113246	0.295182	0.268454	-0.243358	-0.022225	-0.422653	-0.319148	0.0254915	0.464171	-0.138953	0.288132	-0.123086	0.0387907	0.131215	-0.279597	-0.190226	0.208461	0.0271953	-0.03841	0.1423	-0.299266	-0.184021	-0.327473	-0.556081	-0.393022
	p-PLCG2(Y759)[15m]	-0.83609		p-GAB2(S159)[00m]	0.220046		p-4EBP1(T37/46)[15m]	-0.0270002	0.442281	0.546642	-0.0883904	0.714055	1	0.245837	0.0831224	0.108491	-0.195021	0.0295306	0.115877	0.240245	0.441233	0.115651	-0.322797	-0.333977	-0.332829	-0.132788	-0.241535	-0.190204	0.0572997	-0.180902	-0.155276	-0.25115	0.068105	-0.0781629	0.191654	-0.207189	-0.048041	0.0141951	-0.383226	-0.211564	-0.134591	-0.226083	-0.205954	-0.142576	-0.510777	-0.261996	-0.402359	-0.460721	-0.307654
	p-EGFR(Y845)[05m]	-0.835868		p-4EBP1(T37/46)[00m]	0.19525		p-ABL(C-)(Y245)[00m]	0.0960003	0.3933	0.381026	0.196146	0.307179	0.245837	1	0.703479	0.584989	-0.477667	-0.244813	-0.38908	-0.0915062	0.0413964	0.145756	-0.167942	-0.183422	-0.166349	0.336807	0.192755	-0.489579	-0.0266263	-0.182851	0.0325925	-0.161148	0.2362	-0.215639	0.700305	0.0858368	0.164185	0.332836	-0.205903	-0.0801185	0.485592	-0.00686021	-0.0500264	0.417927	-0.257656	-0.120493	0.197836	-0.158088	-0.0963272
	p-PLCG2(Y759)[05m]	-0.831438		p-PTEN(S380)[15m]	0.157335		p-ABL(C-)(Y245)[05m]	-0.194752	0.0289165	0.317542	-0.0486028	0.0415617	0.0831224	0.703479	1	0.837754	-0.464927	-0.410236	-0.575026	-0.507949	-0.0149593	0.351549	-0.00528125	-0.222057	-0.199277	-0.00586669	0.0391369	-0.402063	0.102518	0.0813419	0.288226	-0.443266	-0.0793123	-0.333378	0.138968	0.191938	0.257685	-0.0180919	0.0383114	0.151232	-0.00610972	0.0135867	-0.0480856	0.132835	-0.144785	-0.0469524	0.399583	0.366788	0.463381
	p-EGFR(Y1173)[05m]	-0.825258		p-IGF1RB (Y1135/1136) /…[00m]	0.117389		p-ABL(C-)(Y245)[15m]	-0.0281537	0.235374	0.559259	-0.0325171	0.064115	0.108491	0.584989	0.837754	1	-0.442879	-0.340521	-0.452757	-0.48251	-0.0604392	0.472673	-0.251611	-0.373506	-0.295765	-0.0888877	-0.0107817	-0.497016	0.351422	0.303299	0.566579	-0.487632	-0.315794	-0.536629	0.209621	0.170867	0.313561	-0.0474743	-0.0853829	0.0838474	-0.0954448	-0.0823415	-0.0473151	-0.0181947	-0.120169	0.0537323	0.28192	0.309048	0.528217
	p-PYK2(Y402)[05m]	-0.809879		p-EGFR(Y1173)[00m]	0.105087		p-AKT(S473)[00m]	0.140417	-0.172893	-0.266891	0.160505	-0.223381	-0.195021	-0.477667	-0.464927	-0.442879	1	0.746799	0.767396	0.219523	0.117194	-0.346568	0.637172	0.673208	0.638791	0.201753	0.274711	0.445615	0.280475	0.341761	0.193246	0.636673	0.211201	0.517313	-0.283486	-0.513647	-0.554054	-0.0626824	-0.351167	-0.463916	-0.023612	-0.425151	-0.250639	0.0554087	-0.140142	-0.31896	0.194411	0.151737	0.24412
	p-EGFR(Y845)[15m]	-0.809169		p-CDK2(T160)[15m]	0.0976334		p-AKT(S473)[05m]	0.537971	0.331739	0.0372472	0.587492	0.0747932	0.0295306	-0.244813	-0.410236	-0.340521	0.746799	1	0.923894	0.309288	0.189647	-0.544937	0.361162	0.696632	0.713897	0.426882	0.523064	0.461072	0.0288037	0.453177	0.211546	0.599885	0.396666	0.535848	0.0905737	-0.781557	-0.773538	0.281948	-0.683779	-0.787643	0.293719	-0.667737	-0.54327	0.27584	-0.504611	-0.573982	0.244789	-0.0575739	-0.0555643
	p-STAT1(Y701)[15m]	-0.797511		p-AKT(S473)[05m]	0.0744574		p-AKT(S473)[15m]	0.520567	0.303415	0.0104469	0.461056	0.0739041	0.115877	-0.38908	-0.575026	-0.452757	0.767396	0.923894	1	0.456727	0.24625	-0.449744	0.283735	0.606476	0.648678	0.282602	0.352017	0.447443	0.0403011	0.337522	0.182752	0.574442	0.285693	0.52879	0.0512439	-0.722393	-0.702034	0.224785	-0.680745	-0.725201	0.211803	-0.60332	-0.445157	0.125719	-0.426766	-0.46029	0.0757601	-0.245498	-0.152341
	p-EGFR(Y1173)[15m]	-0.796676		p-AKT(S473)[15m]	0.0680912		p-CDC2(Y15)[00m]	0.503915	0.324608	0.135016	0.216653	0.13951	0.240245	-0.0915062	-0.507949	-0.48251	0.219523	0.309288	0.456727	1	0.588795	0.0920353	-0.125207	0.159238	0.146881	-0.0847361	-0.0627185	-0.00581005	-0.23989	-0.0243768	-0.00547488	0.408992	0.110101	0.21019	0.406203	-0.569158	-0.569499	0.693054	-0.553403	-0.528735	0.388713	-0.360088	-0.429852	0.248702	-0.439849	-0.428893	-0.0612511	-0.477381	-0.466414
	p-PLCG1(Y783)[15m]	-0.791062		p-PKCPAN/G(T514)[15m]	0.0530853		p-CDC2(Y15)[05m]	0.165951	0.15855	0.320187	-0.145352	-0.0421489	0.441233	0.0413964	-0.0149593	-0.0604392	0.117194	0.189647	0.24625	0.588795	1	0.341496	-0.089919	0.00924864	-0.051427	-0.438642	-0.315111	0.0241275	-0.104456	0.391854	0.170885	-0.0362385	-0.146868	0.122749	0.143881	-0.509884	-0.542462	0.354837	-0.533709	-0.485283	-0.0227704	-0.624826	-0.598057	-0.109221	-0.676222	-0.601846	-0.0135468	-0.0832303	-0.105708
	p-FGFR1(Y653/654)[15m]	-0.78802		p-CDK2(T160)[05m]	0.0387937		p-CDC2(Y15)[15m]	-0.074005	-0.0943455	0.415435	-0.373953	-0.20156	0.115651	0.145756	0.351549	0.472673	-0.346568	-0.544937	-0.449744	0.0920353	0.341496	1	-0.347773	-0.484431	-0.494345	-0.665292	-0.551245	-0.538459	0.098589	0.113127	0.401675	-0.429256	-0.623149	-0.480676	-0.00225611	0.157822	0.207849	0.112957	0.0618813	0.231022	-0.295982	-0.0471695	-0.0996522	-0.24515	-0.0177049	0.0527997	0.073478	0.200185	0.394448
	p-SYK(Y525/526)[05m]	-0.781192		p-IRS1(S1101)[05m]	0.0386195		p-CDK2(T160)[00m]	-0.28689	-0.501982	-0.618938	0.0745405	-0.219393	-0.322797	-0.167942	-0.00528125	-0.251611	0.637172	0.361162	0.283735	-0.125207	-0.089919	-0.347773	1	0.825773	0.75886	0.385918	0.48843	0.552458	0.150299	0.0391435	-0.118328	0.516481	0.511378	0.605772	-0.473602	-0.229844	-0.311915	-0.174292	-0.0755542	-0.206089	0.0706733	-0.177237	-0.104107	0.214357	-0.0335329	-0.292519	0.48969	0.308971	0.358103
	p-EGFR(Y1068)[05m]	-0.780727		p-PKCPAN/G(T514)[05m]	0.0366176		p-CDK2(T160)[05m]	0.229009	-0.138506	-0.464238	0.502077	-0.177923	-0.333977	-0.183422	-0.222057	-0.373506	0.673208	0.696632	0.606476	0.159238	0.00924864	-0.484431	0.825773	1	0.955777	0.529312	0.695693	0.654737	-0.14076	0.192238	-0.0200345	0.729341	0.617695	0.739654	-0.166908	-0.539	-0.627131	0.210423	-0.413408	-0.5612	0.411687	-0.417186	-0.364697	0.440157	-0.255761	-0.488874	0.567319	0.0909904	0.100203
	p-FGFR1(Y653/654)[05m]	-0.779955		p-GSK3A(S21)[05m]	0.0254177		p-CDK2(T160)[15m]	0.332882	-0.030269	-0.384934	0.60298	-0.113246	-0.332829	-0.166349	-0.199277	-0.295765	0.638791	0.713897	0.648678	0.146881	-0.051427	-0.494345	0.75886	0.955777	1	0.594619	0.758166	0.57121	-0.104878	0.217575	0.0689421	0.746815	0.591999	0.66633	-0.100435	-0.555985	-0.625959	0.251414	-0.480446	-0.603751	0.465314	-0.460788	-0.37593	0.4711	-0.27909	-0.47193	0.562627	0.0399473	0.0947553
	p-STAT6(Y641)[15m]	-0.77674		p-MET(Y1234/1235)[00m]	0.0195592		p-CREB(S133)[00m]	0.266563	0.327521	-0.20114	0.673592	0.295182	-0.132788	0.336807	-0.00586669	-0.0888877	0.201753	0.426882	0.282602	-0.0847361	-0.438642	-0.665292	0.385918	0.529312	0.594619	1	0.828111	0.23924	-0.0315267	-0.19893	-0.254351	0.604754	0.775953	0.3652	0.330885	-0.123078	-0.149587	0.184448	-0.252355	-0.363607	0.669482	-0.0486725	-0.0457219	0.652307	-0.0921803	-0.166575	0.2094	-0.249795	-0.279671
	p-GAB1(Y627)[05m]	-0.746911		p-STAT3(Y705)[00m]	0.0188595		p-CREB(S133)[05m]	0.372958	0.286087	-0.172763	0.759277	0.268454	-0.241535	0.192755	0.0391369	-0.0107817	0.274711	0.523064	0.352017	-0.0627185	-0.315111	-0.551245	0.48843	0.695693	0.758166	0.828111	1	0.302518	-0.113318	0.0192372	-0.0788388	0.632508	0.787591	0.397274	0.174979	-0.305551	-0.33949	0.263417	-0.372289	-0.506034	0.643947	-0.236464	-0.239433	0.593094	-0.200444	-0.370182	0.44138	-0.0981051	-0.0503965
	p-EGFR(Y1068)[15m]	-0.743175		p-IRS1(S1101)[00m]	0.0175826		p-CREB(S133)[15m]	-0.0617714	-0.226976	-0.557988	0.13263	-0.243358	-0.190204	-0.489579	-0.402063	-0.497016	0.445615	0.461072	0.447443	-0.00581005	0.0241275	-0.538459	0.552458	0.654737	0.57121	0.23924	0.302518	1	-0.165755	0.179122	-0.25866	0.391616	0.370955	0.775504	-0.425828	-0.212469	-0.365388	-0.179693	-0.058292	-0.224247	-0.01014	-0.171361	-0.102312	0.110216	0.00947592	-0.127272	0.223635	0.104109	-0.0565643
	p-PLCG1(Y783)[05m]	-0.742124		p-PDK1(S241)[05m]	0.0136506		p-CRKII(Y221)[00m]	-0.381953	-0.0550336	0.181944	-0.406803	-0.022225	0.0572997	-0.0266263	0.102518	0.351422	0.280475	0.0288037	0.0403011	-0.23989	-0.104456	0.098589	0.150299	-0.14076	-0.104878	-0.0315267	-0.113318	-0.165755	1	0.289852	0.368452	-0.180339	-0.263687	-0.246967	-0.179816	0.0275596	0.188019	-0.424289	-0.0319121	0.0193289	-0.443289	-0.0881898	0.0856833	-0.363475	0.0348581	0.0462901	-0.0499299	0.307206	0.47598
	p-SYK(Y525/526)[15m]	-0.730895		p-PDGFRA(Y754)[00m]	0.00713279		p-CRKII(Y221)[05m]	0.302955	0.133046	0.313024	0.112428	-0.422653	-0.180902	-0.182851	0.0813419	0.303299	0.341761	0.453177	0.337522	-0.0243768	0.391854	0.113127	0.0391435	0.192238	0.217575	-0.19893	0.0192372	0.179122	0.289852	1	0.730861	0.0203336	-0.376994	-0.0185043	-0.0617013	-0.500157	-0.507812	0.137767	-0.426335	-0.475675	-0.148627	-0.702444	-0.563404	-0.0575543	-0.430179	-0.391751	0.374124	0.539023	0.476979
	p-SHP2(Y542)[05m]	-0.715697		p-S6RIBPROT(S240/244)[15m]	0.0057887		p-CRKII(Y221)[15m]	0.372673	0.191749	0.471623	0.107667	-0.319148	-0.155276	0.0325925	0.288226	0.566579	0.193246	0.211546	0.182752	-0.00547488	0.170885	0.401675	-0.118328	-0.0200345	0.0689421	-0.254351	-0.0788388	-0.25866	0.368452	0.730861	1	-0.119242	-0.510054	-0.284446	0.12189	-0.387286	-0.249402	0.220997	-0.416699	-0.288418	-0.124619	-0.473442	-0.355815	-0.0117993	-0.269317	-0.148175	0.436942	0.417694	0.638787
	p-ZAP70(Y319)/SYK(Y352)[15m]	-0.714236		p-CREB(S133)[00m]	-0.0051807		p-CRKL(Y207)[00m]	0.444554	0.0830252	-0.285579	0.61752	0.0254915	-0.25115	-0.161148	-0.443266	-0.487632	0.636673	0.599885	0.574442	0.408992	-0.0362385	-0.429256	0.516481	0.729341	0.746815	0.604754	0.632508	0.391616	-0.180339	0.0203336	-0.119242	1	0.582357	0.572402	0.106843	-0.45241	-0.576717	0.363865	-0.427209	-0.583166	0.588915	-0.350163	-0.317635	0.653363	-0.192735	-0.384431	0.260893	-0.204111	-0.19054
	p-STAT6(Y641)[05m]	-0.709109		p-ZAP70(Y319)/SYK(Y352)[00m]	-0.0145491		p-CRKL(Y207)[05m]	0.0947352	0.147839	-0.3587	0.509933	0.464171	0.068105	0.2362	-0.0793123	-0.315794	0.211201	0.396666	0.285693	0.110101	-0.146868	-0.623149	0.511378	0.617695	0.591999	0.775953	0.787591	0.370955	-0.263687	-0.376994	-0.510054	0.582357	1	0.559576	0.142611	-0.199462	-0.246245	0.183482	-0.259715	-0.373428	0.607828	-0.0517891	-0.0946655	0.511638	-0.20212	-0.347596	0.120781	-0.405826	-0.379122
	p-PYK2(Y402)[15m]	-0.70446		p-P70S6K(T421/S424)[05m]	-0.0151398		p-CRKL(Y207)[15m]	0.0720891	-0.179101	-0.432415	0.25573	-0.138953	-0.0781629	-0.215639	-0.333378	-0.536629	0.517313	0.535848	0.52879	0.21019	0.122749	-0.480676	0.605772	0.739654	0.66633	0.3652	0.397274	0.775504	-0.246967	-0.0185043	-0.284446	0.572402	0.559576	1	-0.14832	-0.364579	-0.497473	0.0155159	-0.258451	-0.377208	0.265586	-0.308038	-0.202549	0.324585	-0.145051	-0.339791	0.323024	-0.082602	-0.127135
	p-SRC(Y416)[05m]	-0.699512		p-P70S6K(T421/S424)[15m]	-0.0160607		p-EGFR(Y1068)[00m]	0.62934	0.733646	0.509163	0.463038	0.288132	0.191654	0.700305	0.138968	0.209621	-0.283486	0.0905737	0.0512439	0.406203	0.143881	-0.00225611	-0.473602	-0.166908	-0.100435	0.330885	0.174979	-0.425828	-0.179816	-0.0617013	0.12189	0.106843	0.142611	-0.14832	1	-0.188537	-0.129619	0.671057	-0.450814	-0.361199	0.692065	-0.154004	-0.174081	0.482727	-0.311199	-0.154809	0.0210263	-0.460476	-0.463991
	p-STAT3(Y705)[15m]	-0.691815		p-RAF(C-)(S259)[05m]	-0.0195745		p-EGFR(Y1068)[05m]	-0.564762	-0.36647	-0.283605	-0.486074	-0.123086	-0.207189	0.0858368	0.191938	0.170867	-0.513647	-0.781557	-0.722393	-0.569158	-0.509884	0.157822	-0.229844	-0.539	-0.555985	-0.123078	-0.305551	-0.212469	0.0275596	-0.500157	-0.387286	-0.45241	-0.199462	-0.364579	-0.188537	1	0.933817	-0.577783	0.84566	0.877235	-0.260404	0.823862	0.825245	-0.335532	0.796546	0.801787	-0.391519	-0.0362292	-0.0279652
	p-SRC(Y416)[15m]	-0.67118		p-4EBP1(T37/46)[15m]	-0.0416762		p-EGFR(Y1068)[15m]	-0.573675	-0.268543	-0.112798	-0.508903	0.0387907	-0.048041	0.164185	0.257685	0.313561	-0.554054	-0.773538	-0.702034	-0.569499	-0.542462	0.207849	-0.311915	-0.627131	-0.625959	-0.149587	-0.33949	-0.365388	0.188019	-0.507812	-0.249402	-0.576717	-0.246245	-0.497473	-0.129619	0.933817	1	-0.579122	0.746866	0.872104	-0.317324	0.821178	0.855362	-0.409702	0.74005	0.806499	-0.424628	-0.0858272	0.0341876
	p-PDFGRA(Y849)/…[15m]	-0.658942		p-AKT(S473)[00m]	-0.0460359		p-EGFR(Y1086)[00m]	0.762712	0.541883	0.309373	0.638414	0.131215	0.0141951	0.332836	-0.0180919	-0.0474743	-0.0626824	0.281948	0.224785	0.693054	0.354837	0.112957	-0.174292	0.210423	0.251414	0.184448	0.263417	-0.179693	-0.424289	0.137767	0.220997	0.363865	0.183482	0.0155159	0.671057	-0.577783	-0.579122	1	-0.580493	-0.572746	0.709558	-0.405161	-0.558584	0.632155	-0.529724	-0.474651	0.35286	-0.212127	-0.283751
	p-PDGFRB(Y1009)[15m]	-0.648167		p-PTEN(S380)[05m]	-0.0552967		p-EGFR(Y1086)[05m]	-0.649483	-0.607555	-0.462008	-0.547161	-0.279597	-0.383226	-0.205903	0.0383114	-0.0853829	-0.351167	-0.683779	-0.680745	-0.553403	-0.533709	0.0618813	-0.0755542	-0.413408	-0.480446	-0.252355	-0.372289	-0.058292	-0.0319121	-0.426335	-0.416699	-0.427209	-0.259715	-0.258451	-0.450814	0.84566	0.746866	-0.580493	1	0.928778	-0.434105	0.831884	0.753735	-0.384987	0.837268	0.7451	-0.285479	0.276721	0.0966603
	p-PDGFRB(Y1009)[05m]	-0.634731		p-PDGFRB(Y1009)[00m]	-0.05952		p-EGFR(Y1086)[15m]	-0.651456	-0.560262	-0.307212	-0.610279	-0.190226	-0.211564	-0.0801185	0.151232	0.0838474	-0.463916	-0.787643	-0.725201	-0.528735	-0.485283	0.231022	-0.206089	-0.5612	-0.603751	-0.363607	-0.506034	-0.224247	0.0193289	-0.475675	-0.288418	-0.583166	-0.373428	-0.377208	-0.361199	0.877235	0.872104	-0.572746	0.928778	1	-0.474241	0.856468	0.83198	-0.435709	0.831448	0.832121	-0.303159	0.171139	0.144407
	p-PDFGRA(Y849)/…[05m]	-0.634251		p-SRC(Y527)[15m]	-0.0598045		p-EGFR(Y1173)[00m]	0.613182	0.443544	0.0154755	0.753278	0.208461	-0.134591	0.485592	-0.00610972	-0.0954448	-0.023612	0.293719	0.211803	0.388713	-0.0227704	-0.295982	0.0706733	0.411687	0.465314	0.669482	0.643947	-0.01014	-0.443289	-0.148627	-0.124619	0.588915	0.607828	0.265586	0.692065	-0.260404	-0.317324	0.709558	-0.434105	-0.474241	1	-0.181623	-0.213811	0.759035	-0.278597	-0.326556	0.259429	-0.456267	-0.456974
	p-SHP2(Y542)[15m]	-0.63195		p-P90RSK(S380)[05m]	-0.0620541		p-EGFR(Y1173)[05m]	-0.46956	-0.336919	-0.392658	-0.354618	0.0271953	-0.226083	-0.00686021	0.0135867	-0.0823415	-0.425151	-0.667737	-0.60332	-0.360088	-0.624826	-0.0471695	-0.177237	-0.417186	-0.460788	-0.0486725	-0.236464	-0.171361	-0.0881898	-0.702444	-0.473442	-0.350163	-0.0517891	-0.308038	-0.154004	0.823862	0.821178	-0.405161	0.831884	0.856468	-0.181623	1	0.872777	-0.230107	0.844336	0.825989	-0.35622	-0.106524	-0.139425
	p-GAB1(Y627)[15m]	-0.630826		p-STAT3(S727)[05m]	-0.0687161		p-EGFR(Y1173)[15m]	-0.502974	-0.373751	-0.366332	-0.421673	-0.03841	-0.205954	-0.0500264	-0.0480856	-0.0473151	-0.250639	-0.54327	-0.445157	-0.429852	-0.598057	-0.0996522	-0.104107	-0.364697	-0.37593	-0.0457219	-0.239433	-0.102312	0.0856833	-0.563404	-0.355815	-0.317635	-0.0946655	-0.202549	-0.174081	0.825245	0.855362	-0.558584	0.753735	0.83198	-0.213811	0.872777	1	-0.3607	0.873822	0.866574	-0.408896	-0.146148	-0.0562061
	p-FAK(Y576/577)[15m]	-0.623004		p-P90RSK(S380)[00m]	-0.0690789		p-EGFR(Y845)[00m]	0.523736	0.309766	-0.00550371	0.755107	0.1423	-0.142576	0.417927	0.132835	-0.0181947	0.0554087	0.27584	0.125719	0.248702	-0.109221	-0.24515	0.214357	0.440157	0.4711	0.652307	0.593094	0.110216	-0.363475	-0.0575543	-0.0117993	0.653363	0.511638	0.324585	0.482727	-0.335532	-0.409702	0.632155	-0.384987	-0.435709	0.759035	-0.230107	-0.3607	1	-0.272948	-0.308712	0.556186	-0.0866306	-0.152061
	p-FAK(Y576/577)[05m]	-0.602671		p-CRKL(Y207)[00m]	-0.0705345		p-EGFR(Y845)[05m]	-0.409743	-0.498606	-0.493808	-0.352558	-0.299266	-0.510777	-0.257656	-0.144785	-0.120169	-0.140142	-0.504611	-0.426766	-0.439849	-0.676222	-0.0177049	-0.0335329	-0.255761	-0.27909	-0.0921803	-0.200444	0.00947592	0.0348581	-0.430179	-0.269317	-0.192735	-0.20212	-0.145051	-0.311199	0.796546	0.74005	-0.529724	0.837268	0.831448	-0.278597	0.844336	0.873822	-0.272948	1	0.884395	-0.194626	0.10368	0.108962
	p-MTOR(S2448)[15m]	-0.596814		p-PTEN(S380)[00m]	-0.0716923		p-EGFR(Y845)[15m]	-0.336478	-0.279378	-0.287973	-0.367366	-0.184021	-0.261996	-0.120493	-0.0469524	0.0537323	-0.31896	-0.573982	-0.46029	-0.428893	-0.601846	0.0527997	-0.292519	-0.488874	-0.47193	-0.166575	-0.370182	-0.127272	0.0462901	-0.391751	-0.148175	-0.384431	-0.347596	-0.339791	-0.154809	0.801787	0.806499	-0.474651	0.7451	0.832121	-0.326556	0.825989	0.866574	-0.308712	0.884395	1	-0.326476	-0.0142678	0.0290122
	p-JAK1(Y1022/1023)[05m]	-0.592086		p-STAT3(S727)[00m]	-0.0784778		p-ERBB2(Y1221/1222)[00m]	0.254015	-0.0863918	-0.0515966	0.413908	-0.327473	-0.402359	0.197836	0.399583	0.28192	0.194411	0.244789	0.0757601	-0.0612511	-0.0135468	0.073478	0.48969	0.567319	0.562627	0.2094	0.44138	0.223635	-0.0499299	0.374124	0.436942	0.260893	0.120781	0.323024	0.0210263	-0.391519	-0.424628	0.35286	-0.285479	-0.303159	0.259429	-0.35622	-0.408896	0.556186	-0.194626	-0.326476	1	0.551424	0.571828
	p-ERBB4(Y1284)[05m]	-0.584967		p-RAF(C-)(S338)[15m]	-0.0800924		p-ERBB2(Y1221/1222)[05m]	-0.273504	-0.424881	-0.0671288	-0.208732	-0.556081	-0.460721	-0.158088	0.366788	0.309048	0.151737	-0.0575739	-0.245498	-0.477381	-0.0832303	0.200185	0.308971	0.0909904	0.0399473	-0.249795	-0.0981051	0.104109	0.307206	0.539023	0.417694	-0.204111	-0.405826	-0.082602	-0.460476	-0.0362292	-0.0858272	-0.212127	0.276721	0.171139	-0.456267	-0.106524	-0.146148	-0.0866306	0.10368	-0.0142678	0.551424	1	0.796237
	p-ZAP70(Y319)/SYK(Y352)[05m]	-0.58177		p-SRC(Y527)[00m]	-0.0806663		p-ERBB2(Y1221/1222)[15m]	-0.250926	-0.410251	0.0548759	-0.207668	-0.393022	-0.307654	-0.0963272	0.463381	0.528217	0.24412	-0.0555643	-0.152341	-0.466414	-0.105708	0.394448	0.358103	0.100203	0.0947553	-0.279671	-0.0503965	-0.0565643	0.47598	0.476979	0.638787	-0.19054	-0.379122	-0.127135	-0.463991	-0.0279652	0.0341876	-0.283751	0.0966603	0.144407	-0.456974	-0.139425	-0.0562061	-0.152061	0.108962	0.0290122	0.571828	0.796237	1
	p-PDGFRA(Y754)[05m]	-0.574835		p-P90RSK(S380)[15m]	-0.0949277		p-ERBB4(Y1284)[00m]	0.304173	0.559855	0.71971	-0.0735545	0.360477	0.57812	0.239559	0.020009	0.235208	-0.280227	-0.0376801	0.0434114	0.494029	0.473699	0.412891	-0.659665	-0.515758	-0.48327	-0.40156	-0.416545	-0.554291	0.156548	0.116134	0.318063	-0.367161	-0.397716	-0.461702	0.49386	-0.306364	-0.109497	0.39373	-0.406698	-0.220384	-0.0776744	-0.226374	-0.281701	-0.157988	-0.401663	-0.174716	-0.216166	-0.248039	-0.168149
	p-KIT(C-)(Y719)[05m]	-0.573359		p-PLCG1(Y783)[00m]	-0.102475		p-ERBB4(Y1284)[05m]	-0.263723	-0.460634	0.0332583	-0.376024	-0.5604	-0.288336	-0.136367	0.393441	0.286219	-0.023211	-0.257515	-0.363565	-0.279432	0.198919	0.443479	0.0680206	-0.146703	-0.217418	-0.558913	-0.417671	-0.11437	0.104701	0.476444	0.414201	-0.365153	-0.583447	-0.254497	-0.396389	0.00431029	-0.0638016	-0.111471	0.27541	0.226143	-0.495586	-0.110152	-0.215769	-0.190499	-0.0288742	-0.0592972	0.358261	0.829972	0.650224
	p-ERBB2(Y1221/1222)[05m]	-0.562077		p-S6RIBPROT(S240/244)[05m]	-0.107802		p-ERBB4(Y1284)[15m]	-0.130154	-0.00242448	0.50817	-0.350556	-0.131888	0.0454725	0.162399	0.502325	0.717212	-0.21161	-0.349071	-0.375802	-0.376741	-0.0566145	0.590063	-0.381431	-0.577454	-0.545662	-0.480282	-0.443873	-0.617795	0.478765	0.340069	0.658253	-0.590749	-0.696317	-0.66446	-0.0253718	0.163542	0.323768	-0.20276	0.138194	0.284202	-0.51601	0.0222094	0.0364342	-0.349126	0.0727794	0.236596	0.0392332	0.473412	0.626615
	p-STAT3(Y705)[05m]	-0.559577		p-FGFR1(Y653/654)[00m]	-0.10853		p-ERK(T202/Y204)[00m]	-0.274303	0.0768603	0.197646	-0.380664	0.564429	0.754555	0.0256488	-0.129669	-0.229606	-0.30235	-0.325204	-0.165448	0.319558	0.349074	0.168128	-0.356966	-0.500466	-0.529412	-0.336557	-0.483564	-0.272436	-0.103937	-0.50463	-0.476935	-0.27383	-0.0210416	-0.214006	0.00554219	0.0978296	0.157046	-0.076191	0.054411	0.154465	-0.248571	0.17867	0.0590648	-0.279205	-0.167042	-0.0153824	-0.644488	-0.487487	-0.47805
	p-CDC2(Y15)[15m]	-0.558277		p-RAF(C-)(S338)[05m]	-0.111418		p-ERK(T202/Y204)[05m]	-0.374795	0.110949	0.0418005	-0.340139	0.407213	0.594659	0.130789	0.0817754	0.029662	-0.415068	-0.223074	-0.207922	-0.0728716	0.319896	-0.078547	-0.250193	-0.366134	-0.379908	-0.139882	-0.270337	0.0815995	-0.0499691	-0.12841	-0.389992	-0.388715	0.087316	-0.145185	-0.0592194	0.174848	0.185308	-0.222053	0.0498221	0.0862798	-0.203346	0.0265373	0.0355995	-0.293221	-0.229152	-0.0262763	-0.549411	-0.313049	-0.406647
	p-ERBB4(Y1284)[15m]	-0.548055		p-EGFR(Y1086)[00m]	-0.118709		p-ERK(T202/Y204)[15m]	-0.54701	-0.204398	-0.0109679	-0.598867	0.200145	0.379813	-0.0481864	0.0844673	0.0468829	-0.512268	-0.53339	-0.423919	-0.217915	0.102244	0.216653	-0.355508	-0.572814	-0.609681	-0.486137	-0.579323	-0.0716278	-0.0558561	-0.319378	-0.337837	-0.658799	-0.240203	-0.282298	-0.256356	0.478398	0.500793	-0.416854	0.442083	0.52908	-0.449012	0.399875	0.368718	-0.572383	0.20042	0.312579	-0.557048	-0.16833	-0.173221
	p-JAK1(Y1022/1023)[15m]	-0.543659		p-CDK2(T160)[00m]	-0.119932		p-FAK(Y576/577)[00m]	0.207911	-0.104849	-0.242426	0.459502	-0.209304	-0.466379	0.296918	0.221622	-0.0135143	0.0263657	0.136358	-0.032896	0.0776966	-0.101531	-0.0975277	0.473496	0.589329	0.567618	0.395574	0.537161	0.156204	-0.290452	0.0120112	-0.00577428	0.369263	0.384808	0.322093	0.159731	-0.23848	-0.331158	0.498383	-0.126464	-0.218075	0.59708	-0.148997	-0.259563	0.627255	-0.144178	-0.350233	0.751694	0.249213	0.127358
	p-KIT(C-)(Y719)[15m]	-0.538641		p-GSK3A(S21)[15m]	-0.121355		p-FAK(Y576/577)[05m]	-0.572234	-0.677432	-0.329916	-0.357041	-0.405355	-0.370778	-0.128273	0.416574	0.160667	0.0343057	-0.22225	-0.398133	-0.594225	-0.175234	0.0336914	0.441472	0.108413	0.00666891	-0.228043	-0.113516	0.169376	0.114071	0.176169	0.0570894	-0.298793	-0.174601	0.00145768	-0.614218	0.167775	0.110708	-0.400472	0.502528	0.402768	-0.457345	0.172578	0.102554	-0.170324	0.218995	0.0682389	0.394737	0.83214	0.650744
	p-ERK(T202/Y204)[15m]	-0.523954		p-KIT(C-)(Y719)[00m]	-0.123164		p-FAK(Y576/577)[15m]	-0.517301	-0.475982	-0.0120445	-0.382298	-0.235241	-0.233086	0.0119463	0.587324	0.568215	-0.139587	-0.394963	-0.523838	-0.702033	-0.344599	0.320826	0.163732	-0.191038	-0.237795	-0.300189	-0.181887	-0.198068	0.377803	0.17393	0.343931	-0.497744	-0.375864	-0.378434	-0.494616	0.309443	0.399038	-0.456482	0.457765	0.497024	-0.55832	0.262435	0.216945	-0.279132	0.299344	0.277093	0.306107	0.739969	0.820336
	p-STAT5(Y694)[05m]	-0.511468		p-FOXO1(S319)/…[15m]	-0.131337		p-FGFR1(Y653/654)[00m]	-0.288658	-0.226412	-0.508545	0.233488	0.243595	-0.0882006	0.242383	0.0939368	-0.175623	0.140727	0.115536	0.00199617	-0.241009	-0.357818	-0.519495	0.681626	0.568053	0.511333	0.701279	0.65175	0.375116	-0.0888376	-0.447512	-0.575117	0.429344	0.828867	0.516841	-0.116407	0.111292	0.0506402	-0.156804	0.0693015	-0.0270154	0.396454	0.155458	0.164301	0.387161	0.0762372	-0.124877	0.197308	-0.136083	-0.123077
	p-P38MAPK(T180/Y182)[15m]	-0.499935		p-FOXO3A(S253)[05m]	-0.133993		p-FGFR1(Y653/654)[05m]	-0.475292	-0.493416	-0.293718	-0.259619	-0.283513	-0.454689	0.119214	0.287672	0.162598	-0.240106	-0.464075	-0.571003	-0.676723	-0.697763	-0.0261471	0.0886727	-0.18579	-0.217413	0.0636923	-0.0662232	-0.0983857	0.0875895	-0.30069	-0.14483	-0.258161	-0.122171	-0.0641702	-0.212038	0.599485	0.591554	-0.456636	0.733579	0.714703	-0.202814	0.602722	0.609283	-0.0295431	0.703968	0.587179	0.130026	0.430715	0.321078
	p-MEK(1/2)(S217/221)[05m]	-0.479639		p-MET(Y1349)[00m]	-0.138184		p-FGFR1(Y653/654)[15m]	-0.412756	-0.370857	-0.0393351	-0.293379	-0.249462	-0.30155	0.145138	0.4364	0.442716	-0.391685	-0.541447	-0.624997	-0.726009	-0.606927	0.189446	-0.142391	-0.40336	-0.397657	-0.143943	-0.220479	-0.248178	0.163945	-0.135322	0.0963345	-0.495961	-0.377121	-0.294983	-0.193811	0.617013	0.666281	-0.461642	0.666101	0.745566	-0.350841	0.541827	0.558448	-0.138802	0.636866	0.662426	0.140303	0.46584	0.464349
	p-ERBB2(Y1221/1222)[15m]	-0.478346		p-EGFR(Y845)[00m]	-0.138889		p-FOXO1(S319)/…[00m]	-0.593391	-0.0466441	0.120627	-0.620394	0.338147	0.542824	0.310516	0.134612	0.125327	-0.19917	-0.39703	-0.310943	-0.0723703	0.106057	0.111927	-0.168515	-0.526989	-0.563609	-0.108505	-0.43296	-0.344074	0.482855	-0.381849	-0.29988	-0.380882	-0.0658669	-0.26276	0.0673072	0.369231	0.48565	-0.424587	0.191437	0.314619	-0.32211	0.281745	0.356615	-0.373689	0.0833188	0.212858	-0.578547	-0.256681	-0.175012
	p-SHC(Y239/240)[15m]	-0.476297		p-RAF(C-)(S259)[15m]	-0.140766		p-FOXO1(S319)/…[05m]	0.0197256	0.448461	0.47424	-0.175821	0.241622	0.431337	0.127267	-0.0804865	0.28306	-0.106353	0.0735548	0.139982	-0.0443711	0.103433	-0.043935	-0.478613	-0.4286	-0.352636	-0.00404737	-0.196095	-0.198695	0.513563	0.215116	0.166803	-0.256888	-0.238545	-0.28477	0.281794	0.0477038	0.197541	-0.250103	-0.25013	-0.129699	-0.183322	-0.149604	0.0384226	-0.322976	-0.135273	0.0843676	-0.499187	-0.310939	-0.212492
	p-ERK(T202/Y204)[05m]	-0.467508		p-S6RIBPROT(S240/244)[00m]	-0.141489		p-FOXO1(S319)/…[15m]	-0.0736963	0.00614496	0.110835	-0.408627	0.0817773	0.435791	-0.321166	-0.436301	-0.253852	0.26071	0.0901636	0.372691	0.484631	0.472568	0.211686	-0.120008	-0.152539	-0.125554	-0.374819	-0.411821	-0.0481527	0.286114	-0.0274307	0.0331656	-0.0300116	-0.194592	0.0895049	-0.0768361	-0.169972	-0.0996791	-0.158739	-0.281597	-0.175394	-0.29564	-0.220864	-0.0682479	-0.50084	-0.170197	-0.0971467	-0.490307	-0.438064	-0.183359
	p-PDGFRA(Y754)[15m]	-0.465154		p-STAT5(Y694)[00m]	-0.144878		p-FOXO3A(S253)[00m]	0.367483	0.0179954	-0.169926	0.353338	-0.0370532	-0.0468552	0.0635692	-0.247272	-0.462744	0.541814	0.562549	0.527912	0.648426	0.413517	-0.196998	0.476366	0.670593	0.589951	0.216738	0.312713	0.225493	-0.244907	0.0513815	-0.0155056	0.602572	0.438272	0.557987	0.251346	-0.680287	-0.732848	0.579591	-0.532983	-0.595779	0.484893	-0.455354	-0.469565	0.461022	-0.433895	-0.593849	0.417876	-0.102744	-0.122642
	p-CRKII(Y221)[00m]	-0.427965		p-CREB(S133)[05m]	-0.145846		p-FOXO3A(S253)[05m]	0.0809747	-0.110062	-0.256596	0.23711	-0.255381	-0.0889454	0.115845	0.0903444	-0.16859	0.294159	0.405551	0.272172	0.148084	0.473386	-0.208082	0.547327	0.654582	0.566083	0.257232	0.356589	0.506921	-0.269591	0.335326	-0.0851177	0.384967	0.422437	0.56124	-0.0409203	-0.44292	-0.607123	0.263746	-0.383859	-0.517017	0.333686	-0.563708	-0.58089	0.363889	-0.542245	-0.648904	0.426666	0.161289	-0.0383292
	p-MEK(1/2)(S217/221)[15m]	-0.418814		p-PKCPAN/G(T514)[00m]	-0.149081		p-FOXO3A(S253)[15m]	0.162518	0.339127	-0.00484335	0.444839	0.592892	0.418691	0.283813	-0.018938	-0.0728812	0.115879	0.368018	0.396329	0.170464	-0.105023	-0.386742	0.310834	0.440175	0.469767	0.619055	0.575753	0.181524	-0.025803	-0.335425	-0.255182	0.347625	0.700266	0.381981	0.222288	-0.326616	-0.207894	0.161536	-0.501606	-0.43432	0.41381	-0.186235	-0.202392	0.374915	-0.365703	-0.336424	0.118576	-0.490823	-0.303096
	p-SYK(Y525/526)[00m]	-0.41018		p-EGFR(Y1068)[00m]	-0.155057		p-GAB1(Y627)[00m]	-0.233645	0.0249804	-0.148207	-0.170089	0.340917	0.208472	-0.198413	-0.554198	-0.426622	0.331998	0.156262	0.260238	0.163313	-0.119861	-0.335068	0.124081	0.0284089	0.0203215	0.290472	0.104832	0.0757302	0.389213	-0.323318	-0.449538	0.330278	0.335549	0.135178	-0.0544947	0.090934	0.110459	-0.30815	0.00643081	-0.0696245	-0.0133579	0.102052	0.219482	-0.198515	0.0873832	0.00734384	-0.603907	-0.454142	-0.401966
	p-STAT5(Y694)[15m]	-0.40364		p-SRC(Y527)[05m]	-0.156187		p-GAB1(Y627)[05m]	-0.361917	-0.0669411	-0.153643	-0.355312	0.0625459	-0.0124861	-0.228163	-0.335194	-0.166824	-0.252677	-0.303852	-0.218932	-0.269728	-0.361981	-0.146856	-0.333031	-0.391699	-0.432291	-0.0219703	-0.20001	0.0596143	0.136182	-0.317291	-0.444768	-0.278089	-0.049743	-0.147401	-0.156475	0.626777	0.633315	-0.515447	0.532306	0.500252	-0.242536	0.565405	0.612185	-0.492975	0.54452	0.52941	-0.693028	-0.276193	-0.359834
	p-PYK2(Y402)[00m]	-0.394643		p-PI3KP85(Y458)P55(Y199)[00m]	-0.158459		p-GAB1(Y627)[15m]	0.284913	0.433492	0.157669	0.112247	0.357981	0.349568	0.0719305	-0.391296	-0.343201	-0.280368	0.0167457	0.149075	0.420705	0.0960243	-0.206941	-0.525809	-0.279964	-0.239215	0.0704316	-0.101057	-0.0788109	-0.329529	-0.428705	-0.410442	-0.0358668	0.154102	0.126954	0.474532	0.0589071	0.0323589	0.190856	-0.0720736	-0.0545598	0.284396	0.150836	0.101007	-0.0203796	-0.0289144	0.0810714	-0.497867	-0.71687	-0.768112
	p-FOXO3A(S253)[15m]	-0.385539		p-FOXO3A(S253)[00m]	-0.168536		p-GAB2(S159)[00m]	0.796658	0.648917	0.272551	0.77241	0.102486	-0.154123	0.49991	0.0933606	0.148521	-0.180984	0.235756	0.162142	0.257327	-0.0788204	-0.16603	-0.232988	0.187435	0.294981	0.541397	0.52638	-0.123091	-0.401599	0.0285388	0.135865	0.37306	0.293084	0.079578	0.80973	-0.220687	-0.258953	0.673182	-0.450102	-0.452925	0.835965	-0.206994	-0.247192	0.676179	-0.228071	-0.182521	0.30535	-0.348824	-0.365659
	p-STAT3(S727)[15m]	-0.383878		p-RAF(C-)(S259)[00m]	-0.170481		p-GAB2(S159)[05m]	0.728401	0.719113	0.402849	0.768724	0.180889	0.0496813	0.500575	0.198777	0.262565	-0.126927	0.385284	0.265049	0.11265	0.0789092	-0.233886	-0.179738	0.21344	0.335647	0.566475	0.559788	-0.0255695	-0.282681	0.260506	0.162339	0.319826	0.305662	0.105016	0.70081	-0.339971	-0.380465	0.550996	-0.588866	-0.616357	0.720883	-0.472369	-0.461202	0.592533	-0.494001	-0.397392	0.265066	-0.252962	-0.315547
	p-FOXO1(S319)/…[00m]	-0.375996		p-CDC2(Y15)[00m]	-0.171182		p-GAB2(S159)[15m]	0.740931	0.807092	0.555399	0.728435	0.306754	0.168633	0.491578	0.186976	0.356644	-0.227623	0.27762	0.205369	0.0892233	-0.0359809	-0.118576	-0.364211	0.0306516	0.162775	0.490953	0.466526	-0.156724	-0.220562	0.155252	0.212713	0.210206	0.202522	-0.0106091	0.725424	-0.244106	-0.20267	0.478364	-0.549368	-0.502023	0.626082	-0.345625	-0.314305	0.501856	-0.373142	-0.237251	0.149408	-0.349569	-0.298041
	p-SRC(Y416)[00m]	-0.368399		p-PKCD(T505)[00m]	-0.173131		p-GSK3A(S21)[00m]	0.543307	0.526415	0.600619	0.303522	-0.0130999	0.0947534	0.486866	0.256242	0.461057	0.15059	0.270353	0.212395	0.240804	0.254254	0.223466	-0.224083	-0.0410376	-0.00165061	0.0959138	0.0768348	-0.351933	0.260828	0.430238	0.658199	0.136582	-0.166912	-0.119227	0.664057	-0.38487	-0.281634	0.427193	-0.595074	-0.469732	0.285416	-0.452571	-0.360144	0.362609	-0.355147	-0.227201	0.332002	0.0244585	0.194867
	p-PI3KP85(Y458)P55(Y199)[05m]	-0.363759		p-4EBP1(T37/46)[05m]	-0.177407		p-GSK3A(S21)[05m]	0.67755	0.657271	0.544906	0.569663	0.0158637	0.0769124	0.332553	0.223514	0.404507	-0.0470856	0.461149	0.291851	0.0533719	0.299813	-0.0314626	-0.270994	0.113367	0.18691	0.213782	0.335315	-0.012874	-0.121078	0.659061	0.480216	0.0918159	0.0170263	-0.0095301	0.519622	-0.455509	-0.457959	0.469454	-0.618761	-0.62982	0.391235	-0.669789	-0.601977	0.325591	-0.58839	-0.45231	0.284044	0.0235275	-0.0234903
	p-MET(Y1349)[15m]	-0.360556		p-SHP2(Y542)[00m]	-0.19713		p-GSK3A(S21)[15m]	0.731247	0.635551	0.598655	0.675781	0.0657352	-0.0473534	0.424892	0.395754	0.516248	-0.238656	0.187797	0.0776008	-0.0307749	-0.0272738	0.153286	-0.346651	-0.0174984	0.120077	0.230324	0.32294	-0.294904	-0.218122	0.353731	0.506966	0.0267276	-0.0916391	-0.227002	0.573919	-0.280005	-0.249194	0.55536	-0.427052	-0.379081	0.450062	-0.37199	-0.431654	0.459942	-0.360275	-0.250789	0.424524	0.0709137	0.0723584
	p-P38MAPK(T180/Y182)[00m]	-0.360283		p-IGF1RB (Y1135/1136) /…[05m]	-0.200533		p-IGF1RB (Y1135/1136) /…[00m]	0.83344	0.657241	0.382553	0.492441	0.0630587	0.0719261	0.215898	-0.289223	-0.169997	-0.0165893	0.288781	0.346818	0.73143	0.348612	0.0354485	-0.467179	-0.0148207	0.0306546	0.10447	0.0570063	-0.195759	-0.372889	0.0902226	0.184173	0.303235	0.0127504	0.00771303	0.804732	-0.413222	-0.427322	0.783769	-0.53428	-0.504806	0.594476	-0.297625	-0.358685	0.402432	-0.345607	-0.238464	-0.0144559	-0.469031	-0.526797
	p-MET(Y1349)[05m]	-0.358738		p-4EBP1(S65)[15m]	-0.200947		p-IGF1RB (Y1135/1136) /…[05m]	0.765861	0.551461	0.464732	0.547672	-0.0809061	0.00280013	0.207998	-0.0168548	0.0636323	-0.128721	0.317971	0.251488	0.327426	0.250679	0.00950231	-0.408638	0.0417163	0.10103	0.0794546	0.133987	-0.0925984	-0.430624	0.364172	0.308284	0.143377	-0.0971942	0.0427145	0.592327	-0.479937	-0.484015	0.63386	-0.486585	-0.485244	0.445359	-0.471441	-0.512896	0.382505	-0.438167	-0.330838	0.204276	-0.0840618	-0.269301
	p-GAB2(S159)[05m]	0.357884		p-SAPK/JNK(T183/Y185)[05m]	-0.201968		p-IGF1RB (Y1135/1136) /…[15m]	0.784599	0.518545	0.493697	0.512158	-0.0824089	-0.0443219	0.196146	-0.0410346	0.0822115	-0.17047	0.147555	0.166255	0.483438	0.178307	0.277558	-0.478537	-0.0790114	0.00907859	-0.0109147	0.0089236	-0.309926	-0.347923	0.212934	0.399365	0.140094	-0.234419	-0.118293	0.62967	-0.401738	-0.370545	0.756399	-0.424334	-0.356436	0.444765	-0.335924	-0.439786	0.431574	-0.311071	-0.20952	0.250572	-0.109897	-0.188947
	p-CRKII(Y221)[15m]	-0.339098		p-PKCD(T505)[15m]	-0.20889		p-IRS1(S1101)[00m]	0.839423	0.464861	0.326929	0.617575	-0.111374	-0.15106	0.228811	0.00647672	0.033454	-0.0736391	0.262266	0.215217	0.538571	0.295032	0.183076	-0.237904	0.195291	0.246028	0.0487079	0.213191	-0.113316	-0.488604	0.264069	0.360192	0.275045	-0.0208064	0.0887223	0.608042	-0.513363	-0.560042	0.858208	-0.513178	-0.503713	0.570176	-0.419088	-0.539491	0.555379	-0.377896	-0.362671	0.504652	-0.0606167	-0.121758
	p-CRKL(Y207)[05m]	-0.331289		p-P70S6K(T421/S424)[00m]	-0.210993		p-IRS1(S1101)[05m]	0.712901	0.489143	0.273798	0.610861	-0.1474	-0.109055	0.336038	0.139534	0.109101	-0.194787	0.24213	0.159031	0.231154	0.294118	-0.0353171	-0.237097	0.184314	0.242372	0.214938	0.277961	0.0509732	-0.568758	0.326214	0.177399	0.207746	0.0735365	0.117416	0.579058	-0.31327	-0.435506	0.641279	-0.444765	-0.477501	0.622274	-0.439451	-0.485045	0.512428	-0.436337	-0.369663	0.327602	-0.118379	-0.306862
	p-GAB1(Y627)[00m]	-0.323977		p-SAPK/JNK(T183/Y185)[15m]	-0.218961		p-IRS1(S1101)[15m]	0.702483	0.540704	0.416162	0.538887	0.0529037	-0.0990076	0.380584	0.248185	0.418053	-0.317399	-0.0390437	-0.0236397	0.200728	-0.0502687	0.306577	-0.415076	-0.0929175	0.0278989	0.11728	0.216443	-0.440558	-0.292113	0.112215	0.470318	0.0574254	-0.0849888	-0.344036	0.594886	-0.143264	-0.0813286	0.628112	-0.36655	-0.255537	0.501657	-0.15235	-0.254943	0.393685	-0.214594	-0.052136	0.242864	-0.212737	-0.0653327
	p-ERBB4(Y1284)[00m]	-0.318176		p-SAPK/JNK(T183/Y185)[00m]	-0.219897		p-JAK1(Y1022/1023)[00m]	0.674167	0.597844	0.588939	0.267084	0.0755109	0.203362	0.241672	-0.0817244	0.0580092	-0.170489	0.10586	0.161359	0.646778	0.387256	0.282799	-0.572942	-0.246024	-0.200111	-0.187447	-0.175909	-0.327819	-0.17131	0.150112	0.341894	0.00338281	-0.259996	-0.105453	0.716893	-0.389456	-0.33867	0.689247	-0.461576	-0.355502	0.301245	-0.2972	-0.358719	0.283206	-0.327186	-0.189982	0.117912	-0.238196	-0.249567
	p-GAB2(S159)[15m]	0.316024		p-JAK1(Y1022/1023)[00m]	-0.220545		p-JAK1(Y1022/1023)[05m]	0.343939	0.19388	0.427554	0.00890986	-0.3914	-0.177614	-0.0320923	0.0799825	0.206298	-0.24279	-0.0475325	-0.124073	0.0112983	0.25362	0.253225	-0.568309	-0.377505	-0.345703	-0.389352	-0.357046	-0.22154	-0.140644	0.583657	0.433113	-0.26524	-0.616735	-0.354194	0.227407	-0.102748	-0.167307	0.255401	-0.0125127	-0.052884	-0.0823891	-0.272054	-0.312709	-0.0352407	-0.182992	-0.0765114	0.0127552	0.333201	0.0307987
	p-CRKII(Y221)[05m]	-0.314654		p-ERBB2(Y1221/1222)[00m]	-0.221981		p-JAK1(Y1022/1023)[15m]	0.511923	0.391738	0.595368	0.183095	-0.0601938	-0.0972352	0.111194	0.19778	0.459648	-0.17531	-0.0482538	-0.0906583	0.051493	-0.0138838	0.396546	-0.583646	-0.412338	-0.340026	-0.304115	-0.1968	-0.529137	0.0638324	0.382269	0.673215	-0.249614	-0.556029	-0.542959	0.373102	-0.143594	-0.0516888	0.340972	-0.124297	-0.0474697	-0.0701784	-0.0802635	-0.185105	0.0348215	-0.0297892	0.11557	0.17219	0.253978	0.297038
	p-PKCD(T505)[05m]	-0.308435		p-SHC(Y239/240)[05m]	-0.22664		p-KIT(C-)(Y719)[00m]	-0.332123	0.053547	-0.235677	-0.14016	0.506166	0.352024	0.111911	-0.288594	-0.305788	-0.102991	-0.114224	-0.0263583	0.0862738	-0.135312	-0.331503	0.0483226	-0.0433196	-0.0716547	0.376042	0.149105	0.0461592	0.0675825	-0.631376	-0.713797	0.139302	0.531636	0.121977	0.0497287	0.295064	0.318231	-0.256896	0.0946073	0.0779425	0.169529	0.306791	0.328834	-0.101631	0.0894486	0.0694357	-0.623592	-0.668407	-0.619218
	p-ABL(C-)(Y245)[05m]	-0.30791		p-IRS1(S1101)[15m]	-0.229519		p-KIT(C-)(Y719)[05m]	-0.532801	-0.406947	-0.297659	-0.314167	0.197934	0.00543133	0.144674	0.239258	-0.0712863	-0.508914	-0.558758	-0.624389	-0.385401	-0.292239	-0.0540548	-0.0537858	-0.289359	-0.353207	-0.106281	-0.138238	-0.174653	-0.344562	-0.621908	-0.571542	-0.36941	0.166111	-0.140789	-0.223449	0.567845	0.529973	-0.313484	0.649892	0.635321	-0.111346	0.612588	0.494474	-0.159623	0.371747	0.279606	-0.25617	-0.0613935	-0.154806
	p-MEK(1/2)(S217/221)[00m]	-0.30596		p-FAK(Y576/577)[00m]	-0.236026		p-KIT(C-)(Y719)[15m]	-0.525253	-0.41318	-0.182549	-0.41703	0.113745	0.12571	0.238702	0.396249	0.0789291	-0.52457	-0.620415	-0.640753	-0.336422	-0.115088	0.1806	-0.100977	-0.384934	-0.444782	-0.298889	-0.340272	-0.270736	-0.320873	-0.560858	-0.372113	-0.529092	-0.0151273	-0.167856	-0.175378	0.521855	0.507281	-0.267817	0.582608	0.658028	-0.216738	0.530052	0.437263	-0.205292	0.297674	0.310599	-0.152433	0.0078993	0.00268619
	p-CREB(S133)[15m]	-0.305175		p-SHC(Y239/240)[00m]	-0.238615		p-MEK(1/2)(S217/221)[00m]	-0.752685	-0.387522	-0.196969	-0.625319	0.308894	0.469173	0.0977406	0.0826724	-0.144407	-0.222661	-0.496926	-0.412807	-0.0732247	0.122014	0.106528	0.0715599	-0.337524	-0.427903	-0.187393	-0.402264	-0.133992	0.111425	-0.573634	-0.608466	-0.274676	0.0994974	-0.0872706	-0.297861	0.401231	0.410879	-0.435986	0.3794	0.430578	-0.336462	0.368732	0.309394	-0.308354	0.101495	0.120978	-0.510353	-0.198108	-0.200666
	p-RAF(C-)(S338)[00m]	-0.305074		p-P38MAPK(T180/Y182)[05m]	-0.24165		p-MEK(1/2)(S217/221)[05m]	-0.427421	-0.0910059	-0.320938	-0.225649	0.24091	0.255592	-0.11107	-0.0586162	-0.164285	-0.290631	-0.103021	-0.144495	-0.25889	0.00890631	-0.35615	0.000327062	-0.0879268	-0.115853	0.0175628	-0.06435	0.391005	-0.148753	-0.136906	-0.483872	-0.259495	0.221314	0.0369198	-0.312363	0.207496	0.173615	-0.320394	0.238868	0.179523	-0.207816	0.167424	0.158294	-0.243969	0.00176371	0.104259	-0.395041	-0.1387	-0.332116
	p-CRKL(Y207)[15m]	-0.302625		p-PI3KP85(Y458)P55(Y199)[15m]	-0.246107		p-MEK(1/2)(S217/221)[15m]	-0.539424	-0.455694	-0.47821	-0.468966	-0.085921	0.0362117	-0.486406	-0.325631	-0.467283	-0.0767412	-0.184827	-0.0723421	-0.115042	0.00959693	-0.192125	0.101291	-0.0598817	-0.116687	-0.278383	-0.34378	0.487698	-0.121115	-0.257404	-0.532133	-0.22928	-0.0282641	0.250069	-0.550701	0.294527	0.18097	-0.4628	0.464564	0.380857	-0.394161	0.316763	0.305518	-0.438459	0.292518	0.222338	-0.354241	-0.0338712	-0.203933
	p-MTOR(S2448)[05m]	-0.297183		p-FOXO1(S319)/…[05m]	-0.247166		p-MET(Y1234/1235)[00m]	0.681426	0.507833	0.0903857	0.810123	0.0796848	-0.228887	0.48191	0.065872	0.0687947	0.0524435	0.362268	0.238834	0.301402	-0.0715241	-0.223568	0.0914979	0.435942	0.499942	0.70414	0.667346	0.00126873	-0.28015	0.0638872	0.119596	0.57865	0.483031	0.188176	0.681709	-0.324965	-0.361	0.7268	-0.481985	-0.521761	0.919096	-0.269802	-0.307758	0.803954	-0.294614	-0.306831	0.421569	-0.23008	-0.249997
	p-PDK1(S241)[15m]	0.293986		p-STAT6(Y641)[00m]	-0.252155		p-MET(Y1234/1235)[05m]	-0.52446	-0.507717	-0.448341	-0.431131	-0.290084	-0.499856	-0.162507	0.0510922	0.0510601	-0.2885	-0.617726	-0.590662	-0.594979	-0.698402	0.0289798	-0.0750074	-0.360165	-0.385818	-0.136718	-0.252117	-0.0746069	0.0941274	-0.371136	-0.206186	-0.384528	-0.265216	-0.321381	-0.347313	0.847236	0.811348	-0.558392	0.911944	0.899594	-0.357946	0.874465	0.844796	-0.330793	0.935072	0.872228	-0.187633	0.241455	0.191033
	p-4EBP1(S65)[00m]	0.288788		p-PDK1(S241)[00m]	-0.256423		p-MET(Y1234/1235)[15m]	-0.495469	-0.453935	-0.352464	-0.471366	-0.268496	-0.336617	-0.117071	0.0696826	0.119445	-0.300586	-0.597315	-0.532384	-0.586766	-0.615911	0.0700592	-0.169164	-0.436789	-0.450219	-0.208034	-0.359796	-0.0989056	0.0959452	-0.347034	-0.120399	-0.468872	-0.332374	-0.297747	-0.289724	0.851963	0.851729	-0.602696	0.830562	0.902367	-0.399401	0.819908	0.889363	-0.39019	0.897897	0.94291	-0.247681	0.125009	0.188265
	p-STAT1(Y701)[00m]	-0.282779		p-IGF1RB (Y1135/1136) /…[15m]	-0.256698		p-MET(Y1349)[00m]	0.452809	0.173653	0.429162	0.0481844	-0.386804	-0.0930591	0.0917676	0.197753	0.319498	0.0414373	0.0745863	0.0880406	0.379408	0.547815	0.619103	-0.195079	-0.0315521	-0.00925264	-0.463508	-0.229238	-0.274313	0.00495502	0.564369	0.719309	-0.11535	-0.498732	-0.147369	0.260895	-0.437808	-0.415174	0.502537	-0.419722	-0.329573	-0.00664979	-0.498835	-0.50383	0.0171323	-0.344691	-0.296523	0.454558	0.298573	0.381383
	p-ABL(C-)(Y245)[00m]	-0.28087		p-CDC2(Y15)[05m]	-0.258061		p-MET(Y1349)[05m]	0.295705	0.651594	0.598545	0.202271	0.446356	0.53554	0.212557	0.0487679	0.225383	-0.312408	0.156599	0.117976	-0.0766696	0.168044	-0.168225	-0.623937	-0.402781	-0.341841	0.0442318	-0.0676295	-0.0785203	-0.0696156	0.171653	-0.0210346	-0.263365	-0.0756432	-0.179201	0.389474	-0.0650337	-0.0192614	0.014861	-0.245488	-0.204822	0.020759	-0.182029	-0.16886	-0.0600585	-0.305524	-0.082189	-0.372597	-0.275837	-0.384233
	p-ABL(C-)(Y245)[15m]	-0.276692		p-PDFGRA(Y849)/…[00m]	-0.261162		p-MET(Y1349)[15m]	-0.00249972	0.470388	0.302278	0.0363239	0.539444	0.341649	0.450719	0.0788751	0.235395	-0.527057	-0.303419	-0.263063	-0.160601	-0.339968	-0.165184	-0.540218	-0.525876	-0.426847	0.325742	0.0302588	-0.382434	0.0947222	-0.445117	-0.319324	-0.197312	0.123186	-0.343361	0.503695	0.447202	0.537544	-0.126217	0.103491	0.185179	0.22113	0.37171	0.402088	-0.0161856	0.161553	0.338245	-0.572312	-0.587126	-0.534429
	p-MTOR(S2448)[00m]	-0.270185		p-PLCG2(Y759)[00m]	-0.261263		p-MTOR(S2448)[00m]	0.145657	-0.00440796	0.0711847	-0.00983159	-0.0386751	0.149108	0.249062	0.070893	-0.152497	0.036149	-0.0175069	0.0103025	0.65343	0.653271	0.358357	0.128736	0.157295	0.0960815	-0.225461	-0.149183	-0.20458	-0.229113	-0.0229428	0.023601	0.168613	0.0204078	0.0536017	0.252121	-0.439492	-0.461468	0.599993	-0.369665	-0.33316	0.249183	-0.322447	-0.443808	0.237989	-0.461499	-0.492492	0.24436	-0.048916	-0.0950646
	p-ERK(T202/Y204)[00m]	-0.268747		p-GSK3A(S21)[00m]	-0.264202		p-MTOR(S2448)[05m]	-0.484662	-0.407438	-0.286164	-0.312761	-0.106533	0.196931	0.081795	0.258186	-0.0623511	-0.0218693	-0.147672	-0.167687	-0.0416107	0.458356	0.0985234	0.457284	0.25435	0.115162	-0.127231	-0.0631521	0.305539	-0.14563	-0.038123	-0.333604	-0.0436446	0.221691	0.300473	-0.369423	-0.00471607	-0.113206	-0.15708	0.00266079	-0.0366164	-0.102849	-0.178426	-0.22027	-0.0586893	-0.313463	-0.388017	0.103327	0.109597	0.0223038
	p-GSK3A(S21)[00m]	-0.264202		p-ERK(T202/Y204)[00m]	-0.268747		p-MTOR(S2448)[15m]	-0.605265	-0.165258	0.0796378	-0.503826	0.398532	0.460521	0.240917	0.33709	0.355138	-0.423122	-0.61295	-0.475512	-0.239199	-0.147704	0.38043	-0.0870712	-0.443858	-0.442193	-0.188175	-0.293641	-0.391502	0.335382	-0.503224	-0.189198	-0.453211	-0.0727088	-0.370646	-0.187611	0.451403	0.628963	-0.410638	0.240884	0.439876	-0.340431	0.375513	0.364214	-0.344572	0.153866	0.261459	-0.330662	-0.211934	0.0769054
	p-PLCG2(Y759)[00m]	-0.261263		p-MTOR(S2448)[00m]	-0.270185		p-P38MAPK(T180/Y182)[00m]	-0.789003	-0.635966	-0.393004	-0.676389	-0.031839	0.167579	-0.36025	-0.103473	-0.233395	0.325384	-0.155342	-0.0877101	-0.125033	0.108707	0.0619972	0.485896	0.0345627	-0.0675121	-0.266126	-0.304603	0.194596	0.439339	-0.141073	-0.252864	-0.0530869	0.00326712	0.127605	-0.718012	0.125821	0.126193	-0.593235	0.28154	0.248706	-0.618894	0.0980564	0.147148	-0.425242	0.106985	0.0154055	-0.22843	0.211057	0.275477
	p-PDFGRA(Y849)/…[00m]	-0.261162		p-ABL(C-)(Y245)[15m]	-0.276692		p-P38MAPK(T180/Y182)[05m]	-0.496497	-0.359653	-0.387863	-0.237665	0.0343288	0.263578	-0.147879	-0.0439092	-0.297947	0.304884	0.221211	0.151076	-0.044585	0.348577	-0.260626	0.602518	0.417513	0.289884	0.0706064	0.0856396	0.533887	0.0507202	0.036993	-0.377015	0.156448	0.403119	0.494041	-0.503961	-0.202703	-0.273833	-0.289095	-0.0856902	-0.187742	-0.207135	-0.283153	-0.246762	-0.0707863	-0.335909	-0.411216	-0.00163869	0.104517	-0.00147107
	p-CDC2(Y15)[05m]	-0.258061		p-ABL(C-)(Y245)[00m]	-0.28087		p-P38MAPK(T180/Y182)[15m]	-0.721336	-0.688535	-0.600995	-0.505454	-0.100101	0.0314878	-0.351858	-0.0911796	-0.261306	0.163621	-0.22541	-0.148434	-0.180888	-0.0358579	-0.0176332	0.547889	0.202714	0.0926715	-0.146222	-0.144093	0.462618	0.108907	-0.276658	-0.356273	0.0308609	0.158428	0.324379	-0.742055	0.218031	0.176333	-0.554037	0.317346	0.30806	-0.444798	0.22099	0.226681	-0.207346	0.231329	0.130617	-0.0453906	0.107962	0.189101
	p-IGF1RB (Y1135/1136) /…[15m]	-0.256698		p-STAT1(Y701)[00m]	-0.282779		p-P70S6K(T421/S424)[00m]	-0.287039	-0.0801855	-0.349969	0.11437	0.181552	-0.165894	0.159535	-0.041386	-0.110855	0.23546	0.139579	0.0487138	-0.347586	-0.508732	-0.554663	0.499955	0.327592	0.361172	0.730859	0.52597	0.143664	0.330888	-0.28774	-0.413551	0.366976	0.547614	0.17153	-0.0393846	0.205632	0.17845	-0.305274	0.135745	0.000793088	0.239325	0.168	0.279939	0.14916	0.17401	0.0317805	-0.0963532	-0.08193	-0.124024
	p-PDK1(S241)[00m]	-0.256423		p-MTOR(S2448)[05m]	-0.297183		p-P70S6K(T421/S424)[05m]	0.433007	0.453693	0.177327	0.552697	0.201281	0.0727805	0.346637	0.157076	0.264195	0.228424	0.518436	0.435374	-0.0392865	0.0347016	-0.342974	0.202161	0.452315	0.516625	0.547793	0.636243	0.207536	0.0266607	0.241141	0.207801	0.39153	0.451478	0.356604	0.368121	-0.349855	-0.323656	0.13854	-0.632791	-0.613805	0.457406	-0.443607	-0.293717	0.375677	-0.350192	-0.345122	0.30793	-0.225836	-0.0242313
	p-STAT6(Y641)[00m]	-0.252155		p-CRKL(Y207)[15m]	-0.302625		p-P70S6K(T421/S424)[15m]	0.348401	0.315	0.0138196	0.318262	-0.0468958	-0.0381449	-0.234868	-0.35642	-0.0731821	0.437396	0.580113	0.661705	0.14144	0.0382723	-0.310627	0.146398	0.371715	0.487224	0.328549	0.339949	0.347369	0.257411	0.394673	0.273035	0.414355	0.121967	0.258516	0.0732876	-0.307746	-0.311336	0.0212772	-0.508263	-0.534857	0.218983	-0.487852	-0.236582	0.0756104	-0.2516	-0.223191	0.00444534	-0.252242	-0.0889386
	p-FOXO1(S319)/…[05m]	-0.247166		p-RAF(C-)(S338)[00m]	-0.305074		p-P90RSK(S380)[00m]	0.0937089	0.168938	-0.0709241	-0.0438415	0.307646	0.331002	-0.254603	-0.688924	-0.582264	0.455509	0.372639	0.553331	0.562832	0.249108	-0.293522	0.0459147	0.134205	0.127047	0.139645	0.0232571	0.0903702	0.135593	-0.221617	-0.319716	0.424684	0.295299	0.263347	0.114668	-0.226774	-0.211464	-0.0197481	-0.32078	-0.351275	0.120598	-0.146825	-0.0151493	-0.158882	-0.150153	-0.191699	-0.573129	-0.659079	-0.540436
	p-PI3KP85(Y458)P55(Y199)[15m]	-0.246107		p-CREB(S133)[15m]	-0.305175		p-P90RSK(S380)[05m]	0.77907	0.641011	0.396688	0.589755	0.115379	0.0922763	0.00621291	-0.298832	-0.13291	0.235814	0.650639	0.619838	0.426416	0.348951	-0.261881	-0.225898	0.238326	0.332858	0.224056	0.333255	0.0826435	-0.216609	0.423805	0.238005	0.419731	0.141527	0.235175	0.492239	-0.613959	-0.650928	0.492235	-0.694597	-0.763119	0.456979	-0.655729	-0.566731	0.277314	-0.552894	-0.529799	0.0246269	-0.290264	-0.356789
	p-4EBP1(S65)[05m]	0.245369		p-MEK(1/2)(S217/221)[00m]	-0.30596		p-P90RSK(S380)[15m]	0.616111	0.40218	0.284428	0.20627	-0.0879276	0.21585	-0.180963	-0.441668	-0.334664	0.250167	0.4203	0.569114	0.768796	0.646031	0.115039	-0.281366	0.0629161	0.113075	-0.208456	-0.208221	0.00581346	-0.24414	0.307182	0.274612	0.261285	-0.171383	0.141386	0.358436	-0.602196	-0.636263	0.559863	-0.605799	-0.593865	0.217173	-0.581205	-0.552405	0.072641	-0.543922	-0.416955	-0.132021	-0.342135	-0.369299
	p-P38MAPK(T180/Y182)[05m]	-0.24165		p-ABL(C-)(Y245)[05m]	-0.30791		p-PDFGRA(Y849)/…[00m]	0.446311	0.343589	0.23187	0.142128	0.214855	0.293427	-0.0512358	-0.44506	-0.434247	-0.014205	0.146663	0.275416	0.932349	0.5564	0.169838	-0.311666	-0.0379499	-0.0561033	-0.223378	-0.191913	-0.148092	-0.306082	-0.0915198	-0.0717262	0.184623	-0.00815902	0.00728986	0.419722	-0.480744	-0.459269	0.70565	-0.412506	-0.379293	0.29954	-0.237338	-0.379717	0.143679	-0.408125	-0.367844	-0.14109	-0.432241	-0.51617
	p-SHC(Y239/240)[00m]	-0.238615		p-PKCD(T505)[05m]	-0.308435		p-PDFGRA(Y849)/…[05m]	-0.4318	-0.537521	-0.122545	-0.59392	-0.330796	-0.110246	-0.516276	-0.0455604	-0.0950942	0.0889935	-0.220317	-0.215044	-0.0871123	0.170258	0.279492	0.0197873	-0.219429	-0.331655	-0.729736	-0.601785	0.0100648	0.16328	0.238983	0.172901	-0.419734	-0.558301	-0.26481	-0.610442	0.0173509	0.0329858	-0.280516	0.397105	0.364771	-0.732551	0.153392	0.0557173	-0.532951	0.164416	0.12745	-0.0460373	0.579269	0.448528
	p-FAK(Y576/577)[00m]	-0.236026		p-CRKII(Y221)[05m]	-0.314654		p-PDFGRA(Y849)/…[15m]	-0.460502	-0.54801	-0.100089	-0.592176	-0.277921	-0.139869	-0.405629	0.0839491	0.106741	-0.00423309	-0.346799	-0.326978	-0.243764	-0.0506105	0.354683	-0.027629	-0.300011	-0.386251	-0.687326	-0.561867	-0.165685	0.229807	0.134459	0.277736	-0.498526	-0.571138	-0.416446	-0.582469	0.169315	0.268581	-0.364876	0.45356	0.507584	-0.736116	0.311717	0.245581	-0.560323	0.317958	0.331043	-0.0578078	0.51863	0.552766
	p-IRS1(S1101)[15m]	-0.229519		p-ERBB4(Y1284)[00m]	-0.318176		p-PDGFRA(Y754)[00m]	0.835111	0.664114	0.31771	0.689524	0.0178856	-0.176942	0.372903	-0.108835	-0.0172602	0.0220497	0.383947	0.314119	0.423109	0.0141895	-0.178382	-0.274317	0.148709	0.243515	0.45412	0.370599	-0.185781	-0.23788	0.151261	0.230898	0.389674	0.153663	0.0233742	0.844568	-0.363791	-0.386601	0.745379	-0.471799	-0.506513	0.746012	-0.284353	-0.305833	0.583056	-0.267743	-0.223749	0.214157	-0.264767	-0.369455
	p-SHC(Y239/240)[05m]	-0.22664		p-GAB1(Y627)[00m]	-0.323977		p-PDGFRA(Y754)[05m]	0.512308	0.361219	0.275325	0.322641	-0.116643	0.000352575	0.0331042	-0.149661	-0.0616913	-0.237117	0.0699698	0.056533	0.360597	0.381418	0.17216	-0.395203	-0.0333558	-0.0390795	-0.0487258	0.0546723	0.109538	-0.470824	0.247878	-0.0254253	0.180882	-0.0382014	0.0950165	0.358645	-0.134337	-0.275602	0.441455	-0.271891	-0.321916	0.36589	-0.330456	-0.397724	0.283189	-0.268309	-0.274727	0.0229786	-0.228669	-0.387634
	p-ERBB2(Y1221/1222)[00m]	-0.221981		p-CRKL(Y207)[05m]	-0.331289		p-PDGFRA(Y754)[15m]	0.668596	0.531279	0.610302	0.382415	0.145307	0.104416	0.186813	0.0583696	0.321583	-0.347827	-0.0947375	-0.0414673	0.283805	0.0938922	0.514058	-0.652865	-0.337703	-0.248417	-0.182513	-0.0400316	-0.473132	-0.29169	0.099422	0.359193	-0.0283965	-0.279548	-0.358656	0.50851	-0.0587529	-0.0186775	0.505855	-0.275229	-0.151832	0.28236	-0.155614	-0.212212	0.201486	-0.11458	-0.00175371	0.0351602	-0.273766	-0.0841051
	p-JAK1(Y1022/1023)[00m]	-0.220545		p-CRKII(Y221)[15m]	-0.339098		p-PDGFRB(Y1009)[00m]	0.623429	0.544726	0.112505	0.734526	0.193164	-0.154237	0.269099	-0.111439	-0.105487	-0.0804985	0.270615	0.208344	0.332022	-0.233728	-0.348834	-0.116983	0.222434	0.32129	0.634883	0.521865	0.044388	-0.242828	-0.103631	-0.0519007	0.500531	0.375949	0.197277	0.606611	-0.226647	-0.253093	0.606158	-0.325027	-0.371502	0.74291	-0.0766084	-0.186288	0.770625	-0.124585	-0.143861	0.27139	-0.29482	-0.408594
	p-GAB2(S159)[00m]	0.220046		p-MET(Y1349)[05m]	-0.358738		p-PDGFRB(Y1009)[05m]	-0.31938	-0.519479	-0.650058	-0.201403	-0.237617	-0.384762	-0.713799	-0.509584	-0.628511	0.187099	-0.0544688	-0.0089319	-0.0151391	-0.313178	-0.22946	0.257591	0.1789	0.065757	-0.123031	-0.0786505	0.402839	-0.158946	-0.227485	-0.403854	0.109999	0.0412597	0.128957	-0.631338	0.20107	0.0947655	-0.249066	0.539229	0.353913	-0.273339	0.41645	0.251111	-0.195984	0.437534	0.237851	-0.158255	0.151562	-0.0606074
	p-SAPK/JNK(T183/Y185)[00m]	-0.219897		p-P38MAPK(T180/Y182)[00m]	-0.360283		p-PDGFRB(Y1009)[15m]	-0.174146	-0.550462	-0.602985	-0.133157	-0.335686	-0.315203	-0.728523	-0.555084	-0.635865	0.390033	0.151665	0.206051	0.10654	-0.111284	-0.159083	0.359627	0.359122	0.222575	-0.215916	-0.0786831	0.54473	-0.222456	-0.0839963	-0.256429	0.210313	0.0229894	0.400024	-0.604422	-0.00567521	-0.112909	-0.202891	0.318446	0.19902	-0.274733	0.204069	0.143836	-0.147389	0.373129	0.196504	0.06817	0.156958	0.0958299
	p-SAPK/JNK(T183/Y185)[15m]	-0.218961		p-MET(Y1349)[15m]	-0.360556		p-PDK1(S241)[00m]	0.368197	0.348126	0.275026	0.226662	-0.0346103	0.0606172	0.254115	0.084411	0.0886243	0.375683	0.347057	0.380096	0.402101	0.320347	0.0141114	0.182565	0.234838	0.328758	0.194794	0.137041	-0.164641	0.313563	0.267861	0.393069	0.326767	-0.0187145	0.0206604	0.42252	-0.508043	-0.463235	0.403137	-0.601725	-0.564928	0.259175	-0.466694	-0.387505	0.288585	-0.426112	-0.38525	0.302857	-0.00597278	0.0708348
	p-P70S6K(T421/S424)[00m]	-0.210993		p-PI3KP85(Y458)P55(Y199)[05m]	-0.363759		p-PDK1(S241)[05m]	0.500197	0.388682	0.267546	0.492256	-0.0735244	0.0521087	0.222537	0.183058	0.220646	0.151306	0.519398	0.399807	0.181483	0.490497	-0.0773542	0.154366	0.458934	0.50701	0.239959	0.435741	0.194213	-0.135892	0.623938	0.333863	0.295478	0.205988	0.217279	0.274104	-0.600818	-0.65058	0.445287	-0.733104	-0.782143	0.426879	-0.801828	-0.745606	0.316513	-0.756429	-0.707055	0.382267	0.00712874	-0.0134874
	p-PKCD(T505)[15m]	-0.20889		p-SRC(Y416)[00m]	-0.368399		p-PDK1(S241)[15m]	0.490626	0.3868	0.213402	0.564565	0.316387	0.214324	0.550284	0.316405	0.161306	-0.269936	0.0610012	0.044085	0.388367	0.268087	0.106895	-0.0294807	0.220276	0.281919	0.282622	0.384542	-0.162709	-0.531302	-0.163733	0.026371	0.235578	0.418289	0.125175	0.53084	-0.300522	-0.289141	0.685753	-0.518911	-0.407556	0.734094	-0.277124	-0.373838	0.610672	-0.49492	-0.434059	0.345353	-0.425536	-0.264166
	p-SAPK/JNK(T183/Y185)[05m]	-0.201968		p-FOXO1(S319)/…[00m]	-0.375996		p-PI3KP85(Y458)P55(Y199)[00m]	-0.419309	-0.242132	-0.44825	-0.10257	0.238726	0.0129455	-0.260606	-0.301377	-0.325696	0.297372	0.079908	0.139605	-0.119139	-0.249017	-0.382832	0.498974	0.300638	0.310731	0.391718	0.308952	0.256976	0.284926	-0.305665	-0.49766	0.348004	0.458286	0.149762	-0.420683	0.147943	0.125105	-0.405036	0.112055	-0.00585931	-0.0248157	0.142899	0.193045	-0.152683	0.0986313	-0.0464365	-0.355461	-0.223249	-0.180063
	p-4EBP1(S65)[15m]	-0.200947		p-STAT3(S727)[15m]	-0.383878		p-PI3KP85(Y458)P55(Y199)[05m]	-0.108019	-0.239829	-0.557977	0.114627	-0.0285469	-0.202266	-0.557562	-0.6559	-0.719355	0.594486	0.475966	0.512873	0.0810365	-0.175131	-0.65249	0.56499	0.605228	0.573659	0.376608	0.385403	0.690897	0.013196	-0.123341	-0.478911	0.597066	0.472341	0.669966	-0.399909	-0.165021	-0.2812	-0.273625	0.00581694	-0.203835	0.0351949	-0.029528	0.0522938	0.00545449	0.138991	-0.120561	-0.0896185	-0.102869	-0.229658
	p-IGF1RB (Y1135/1136) /…[05m]	-0.200533		p-FOXO3A(S253)[15m]	-0.385539		p-PI3KP85(Y458)P55(Y199)[15m]	0.117497	-0.189685	-0.433894	0.246203	-0.209596	-0.196791	-0.43582	-0.450499	-0.506823	0.81114	0.708739	0.719163	0.182332	0.0488976	-0.499121	0.70817	0.783461	0.788478	0.344622	0.423616	0.680908	0.0798949	0.206748	-0.0088662	0.650267	0.387968	0.803366	-0.290209	-0.494621	-0.588603	-0.0649032	-0.330416	-0.463472	0.0741865	-0.422523	-0.257016	0.190944	-0.132143	-0.303292	0.335831	0.0887024	0.112508
	p-SHP2(Y542)[00m]	-0.19713		p-PYK2(Y402)[00m]	-0.394643		p-PKCD(T505)[00m]	0.5467	0.445854	0.174217	0.411369	0.276284	0.167116	0.203589	-0.270055	-0.354996	-0.190841	0.106419	0.148192	0.783329	0.359418	0.0250548	-0.284737	0.0520495	0.0619	0.0963195	0.0850653	-0.188883	-0.521921	-0.216606	-0.204292	0.284681	0.22991	-0.00985157	0.578634	-0.378341	-0.401804	0.831256	-0.378944	-0.389255	0.621757	-0.154249	-0.361845	0.410107	-0.412191	-0.382525	-0.0610558	-0.500408	-0.654259
	p-4EBP1(T37/46)[00m]	0.19525		p-STAT5(Y694)[15m]	-0.40364		p-PKCD(T505)[05m]	0.436605	0.0946929	0.0987683	0.296022	-0.3346	-0.10073	-0.167955	-0.0943869	-0.166062	0.286916	0.481458	0.372748	0.411373	0.607176	0.0274545	0.171926	0.451725	0.384127	-0.152849	0.0832863	0.396935	-0.304016	0.640531	0.301641	0.247569	-0.0496352	0.35559	0.0275736	-0.722014	-0.819206	0.529766	-0.476857	-0.582447	0.13855	-0.667695	-0.728806	0.254859	-0.56589	-0.616471	0.505778	0.359857	0.105477
	p-4EBP1(T37/46)[05m]	-0.177407		p-SYK(Y525/526)[00m]	-0.41018		p-PKCD(T505)[15m]	0.605375	0.29372	0.332122	0.318774	-0.0638291	0.0800691	-0.0255835	-0.0689741	0.00145937	0.103801	0.230506	0.308595	0.687877	0.482186	0.403037	-0.107166	0.185915	0.1996	-0.261107	-0.0198112	-0.129245	-0.238241	0.27355	0.495138	0.173318	-0.166257	0.0204745	0.271664	-0.660892	-0.592919	0.721677	-0.595301	-0.501762	0.219352	-0.476144	-0.606442	0.265406	-0.498707	-0.43988	0.417116	-0.0223438	0.0762382
	p-PKCD(T505)[00m]	-0.173131		p-MEK(1/2)(S217/221)[15m]	-0.418814		p-PKCPAN/G(T514)[00m]	-0.207509	-0.332447	-0.43028	-0.085455	-0.207245	-0.21194	-0.363974	-0.334209	-0.361679	0.879698	0.530175	0.540391	0.0258853	0.0113447	-0.357601	0.776686	0.63082	0.588053	0.262485	0.278933	0.411836	0.470121	0.190076	0.0203912	0.507085	0.29474	0.446484	-0.391093	-0.289871	-0.320707	-0.282512	-0.170119	-0.300361	-0.11265	-0.264111	-0.0680076	-0.107914	-0.0363785	-0.238612	0.0868427	0.165882	0.253679
	p-CDC2(Y15)[00m]	-0.171182		p-CRKII(Y221)[00m]	-0.427965		p-PKCPAN/G(T514)[05m]	0.425062	0.0957617	-0.213489	0.411683	-0.239698	-0.203371	-0.367428	-0.504328	-0.424099	0.840466	0.875886	0.88093	0.354753	0.19899	-0.44214	0.519942	0.796925	0.793242	0.359301	0.452714	0.584002	0.0705709	0.44885	0.221294	0.702102	0.33114	0.648395	-0.0364918	-0.665842	-0.720709	0.190487	-0.598622	-0.720965	0.259495	-0.610564	-0.44613	0.214493	-0.343953	-0.462382	0.270911	-0.0392844	-0.000668136
	p-RAF(C-)(S259)[00m]	-0.170481		p-PDGFRA(Y754)[15m]	-0.465154		p-PKCPAN/G(T514)[15m]	0.421282	0.0602778	-0.293181	0.370446	-0.161629	-0.231724	-0.499028	-0.669815	-0.58412	0.824339	0.796515	0.875453	0.486139	0.128814	-0.425987	0.44424	0.691496	0.734811	0.306359	0.385049	0.451844	0.0563506	0.278389	0.138809	0.712404	0.302747	0.517845	-0.0561177	-0.5896	-0.644678	0.230321	-0.490803	-0.611793	0.252786	-0.468361	-0.335885	0.14979	-0.23274	-0.360331	0.113432	-0.168896	-0.109747
	p-FOXO3A(S253)[00m]	-0.168536		p-ERK(T202/Y204)[05m]	-0.467508		p-PLCG1(Y783)[00m]	0.476982	0.494013	0.17473	0.442053	0.06688	-0.202635	-0.0136361	-0.334405	-0.0205319	0.315191	0.42374	0.438036	0.183573	-0.256167	-0.318219	-0.0770856	0.148774	0.28452	0.534309	0.423159	-0.0182552	0.356176	0.204392	0.221983	0.492279	0.147326	0.0253693	0.408559	-0.159608	-0.127403	0.193959	-0.345001	-0.402888	0.421613	-0.188853	-0.0376052	0.258876	-0.0192182	-0.0344855	-0.0805376	-0.262648	-0.186506
	p-PI3KP85(Y458)P55(Y199)[00m]	-0.158459		p-SHC(Y239/240)[15m]	-0.476297		p-PLCG1(Y783)[05m]	-0.384467	-0.300846	-0.392421	-0.243611	-0.135006	-0.442993	-0.147673	-0.0383128	0.00949201	-0.0911087	-0.309004	-0.314645	-0.607406	-0.789582	-0.302325	-0.0387186	-0.250107	-0.218383	0.156965	-0.0233568	-0.0615918	0.223961	-0.294441	-0.14915	-0.209316	-0.0658105	-0.242582	-0.228532	0.704229	0.713629	-0.568267	0.714941	0.679254	-0.211855	0.720151	0.808205	-0.263371	0.7949	0.750715	-0.306514	0.0850594	0.0745524
	p-PTEN(S380)[15m]	0.157335		p-ERBB2(Y1221/1222)[15m]	-0.478346		p-PLCG1(Y783)[15m]	-0.357461	-0.42358	-0.464619	-0.305841	-0.287767	-0.474969	-0.367343	-0.190427	-0.12589	-0.0538128	-0.320997	-0.273555	-0.517293	-0.709221	-0.187268	-0.0653129	-0.228786	-0.245008	-0.070756	-0.178612	0.0512213	0.0618059	-0.276374	-0.156296	-0.242079	-0.199895	-0.178626	-0.368124	0.707236	0.676452	-0.573718	0.783402	0.745331	-0.319275	0.754967	0.81617	-0.375409	0.873395	0.841743	-0.301162	0.09498	0.105912
	p-SRC(Y527)[05m]	-0.156187		p-MEK(1/2)(S217/221)[05m]	-0.479639		p-PLCG2(Y759)[00m]	0.0398547	0.16191	-0.175434	0.353479	0.349465	0.053945	0.350168	0.026316	-0.111374	-0.112245	-0.00374355	-0.0492759	0.305908	-0.0326058	-0.156058	0.262577	0.299439	0.300437	0.566033	0.461255	0.061244	-0.117157	-0.343428	-0.367508	0.411768	0.618738	0.141518	0.253119	-0.0928268	-0.0937834	0.431468	-0.18778	-0.219381	0.607723	0.0329336	-0.123445	0.541731	-0.21844	-0.267957	0.109356	-0.306226	-0.355518
	p-EGFR(Y1068)[00m]	-0.155057		p-P38MAPK(T180/Y182)[15m]	-0.499935		p-PLCG2(Y759)[05m]	-0.705329	-0.674327	-0.538739	-0.525979	-0.21082	-0.366565	-0.304912	0.0394276	-0.120444	-0.23093	-0.575142	-0.585325	-0.554571	-0.553335	-0.0296064	0.0869382	-0.28531	-0.345314	-0.229227	-0.300242	0.0398629	0.034998	-0.389965	-0.347609	-0.386673	-0.182129	-0.204841	-0.601549	0.697243	0.649254	-0.592945	0.935531	0.87569	-0.506929	0.782671	0.694759	-0.358191	0.769634	0.660408	-0.182651	0.364207	0.213278
	p-PKCPAN/G(T514)[00m]	-0.149081		p-STAT5(Y694)[05m]	-0.511468		p-PLCG2(Y759)[15m]	-0.646175	-0.7099	-0.416624	-0.62364	-0.343469	-0.325312	-0.350723	0.034015	-0.0593903	-0.158013	-0.563101	-0.531174	-0.505247	-0.428657	0.153604	-0.0108566	-0.372854	-0.444094	-0.458132	-0.515966	-0.0703276	0.0643985	-0.269104	-0.143435	-0.480971	-0.41369	-0.25666	-0.592598	0.660368	0.630403	-0.598268	0.893509	0.891518	-0.625036	0.709065	0.681622	-0.489671	0.757897	0.719265	-0.194395	0.395751	0.345116
	p-CREB(S133)[05m]	-0.145846		p-ERK(T202/Y204)[15m]	-0.523954		p-PTEN(S380)[00m]	0.0538419	0.440761	0.139266	0.19321	0.514096	0.254253	0.37073	-0.0203538	0.0393335	-0.221923	-0.064128	-0.0164148	-0.0216292	-0.269345	-0.333935	-0.189145	-0.186443	-0.044152	0.563055	0.278976	-0.251914	0.143183	-0.416864	-0.388006	0.136341	0.341975	-0.153086	0.441878	0.246802	0.285902	-0.0383582	-0.0706514	-0.0635774	0.385353	0.185607	0.250193	0.112004	0.0211215	0.0904066	-0.461271	-0.597989	-0.556624
	p-STAT5(Y694)[00m]	-0.144878		p-KIT(C-)(Y719)[15m]	-0.538641		p-PTEN(S380)[05m]	0.240362	0.204861	-0.111885	0.186051	0.397103	0.264464	-0.306606	-0.621064	-0.630217	-6.52277e-05	0.17616	0.335447	0.625579	0.165052	-0.186398	-0.135926	0.125085	0.108796	0.0400831	0.093985	0.132159	-0.413764	-0.418894	-0.48974	0.276403	0.361098	0.186025	0.0737139	-0.200642	-0.204001	0.278918	-0.195828	-0.236008	0.263041	0.0478773	-0.0979708	-0.0270329	-0.142753	-0.201376	-0.422198	-0.71064	-0.697386
	p-S6RIBPROT(S240/244)[00m]	-0.141489		p-JAK1(Y1022/1023)[15m]	-0.543659		p-PTEN(S380)[15m]	0.493666	0.438014	0.0529016	0.378559	0.349459	0.296681	-0.0837761	-0.499026	-0.481964	-0.123665	0.229169	0.360287	0.638127	0.278921	-0.21811	-0.26775	0.122328	0.150722	0.1245	0.184407	0.161618	-0.568201	-0.267792	-0.406774	0.287394	0.346486	0.274437	0.368433	-0.241126	-0.293298	0.44174	-0.36078	-0.37259	0.473079	-0.131616	-0.18308	0.157409	-0.263566	-0.23287	-0.271802	-0.760907	-0.785957
	p-RAF(C-)(S259)[15m]	-0.140766		p-ERBB4(Y1284)[15m]	-0.548055		p-PYK2(Y402)[00m]	-0.246744	0.214387	0.194459	-0.207978	0.364999	0.41792	0.691855	0.359714	0.331448	-0.379583	-0.402591	-0.359374	-0.0600555	0.00263178	0.0496771	-0.175551	-0.367134	-0.346523	0.244818	-0.0691608	-0.369415	0.226563	-0.429234	-0.259611	-0.150317	0.1524	-0.189752	0.462255	0.349113	0.416769	-0.132129	-0.0281512	0.107158	0.169789	0.207088	0.246358	0.0978727	-0.0167473	0.128475	-0.288739	-0.423651	-0.306079
	p-EGFR(Y845)[00m]	-0.138889		p-CDC2(Y15)[15m]	-0.558277		p-PYK2(Y402)[05m]	-0.7247	-0.340843	-0.107129	-0.667861	0.178184	0.152452	-0.212528	0.0112413	0.0442557	-0.342586	-0.577817	-0.544177	-0.437683	-0.34316	0.0749437	-0.236071	-0.596305	-0.67186	-0.358856	-0.464345	-0.196363	0.305097	-0.359719	-0.347656	-0.569292	-0.277439	-0.474992	-0.461305	0.621887	0.699178	-0.669622	0.710813	0.716904	-0.66047	0.666449	0.5722	-0.601718	0.503997	0.537976	-0.573914	0.0995506	0.0445946
	p-MET(Y1349)[00m]	-0.138184		p-STAT3(Y705)[05m]	-0.559577		p-PYK2(Y402)[15m]	-0.777382	-0.498395	-0.192076	-0.827622	0.0572068	0.360675	-0.34505	-0.084744	-0.110683	-0.0691443	-0.420962	-0.271953	-0.20145	0.0407741	0.164823	-0.0151805	-0.412478	-0.503063	-0.557599	-0.651691	0.01965	0.308509	-0.28669	-0.25333	-0.512534	-0.313122	-0.130203	-0.60708	0.373537	0.444901	-0.700115	0.47196	0.557687	-0.808285	0.396855	0.422607	-0.689416	0.308425	0.3924	-0.480358	0.0538497	0.134556
	p-FOXO3A(S253)[05m]	-0.133993		p-ERBB2(Y1221/1222)[05m]	-0.562077		p-RAF(C-)(S259)[00m]	0.260003	0.0596399	0.308669	0.164201	-0.410644	-0.285568	0.406102	0.641062	0.64083	0.0186672	0.0197563	-0.118825	-0.121473	0.215935	0.449767	0.119196	0.133851	0.162535	-0.107945	0.0762141	-0.259542	0.128705	0.576524	0.741133	-0.0902534	-0.300288	-0.1899	0.20651	-0.269886	-0.248956	0.344866	-0.298523	-0.233751	0.0984315	-0.40068	-0.393122	0.2356	-0.273724	-0.247912	0.728003	0.571988	0.645464
	p-FOXO1(S319)/…[15m]	-0.131337		p-KIT(C-)(Y719)[05m]	-0.573359		p-RAF(C-)(S259)[05m]	0.247389	0.169843	0.3416	0.233478	-0.309127	-0.0690508	0.390808	0.569737	0.597312	-0.0128258	0.164855	0.00685032	-0.161442	0.393243	0.26952	0.120153	0.213584	0.241279	0.037817	0.198884	0.0220022	0.049029	0.70444	0.541887	-0.00131351	-0.117797	0.030693	0.173525	-0.318348	-0.358347	0.247012	-0.453286	-0.436931	0.173227	-0.654094	-0.575298	0.251302	-0.52553	-0.467873	0.569504	0.412661	0.403262
	p-KIT(C-)(Y719)[00m]	-0.123164		p-PDGFRA(Y754)[05m]	-0.574835		p-RAF(C-)(S259)[15m]	0.225459	0.514462	0.624543	0.250743	0.280929	0.26828	0.611953	0.637183	0.857528	-0.37443	-0.116678	-0.167103	-0.280203	-0.0742274	0.287485	-0.269398	-0.227388	-0.0892702	0.199463	0.221459	-0.443998	0.278828	0.207572	0.45221	-0.226219	-0.085763	-0.381954	0.409021	-0.00267026	0.161238	0.0994477	-0.371222	-0.198295	0.165182	-0.239378	-0.179433	0.14472	-0.296126	-0.0925919	0.190088	-0.0380678	0.217138
	p-GSK3A(S21)[15m]	-0.121355		p-ZAP70(Y319)/SYK(Y352)[05m]	-0.58177		p-RAF(C-)(S338)[00m]	-0.029948	0.0996379	0.403622	-0.115021	-0.0301512	0.225136	0.46769	0.677208	0.656632	0.0343696	-0.0282787	-0.105157	-0.0667698	0.397827	0.466508	0.133213	-0.0221128	-0.0256142	-0.19346	-0.0939825	-0.351939	0.377637	0.40562	0.606232	-0.245418	-0.21085	-0.289821	0.108978	-0.302344	-0.175587	0.149505	-0.397659	-0.257165	-0.152788	-0.403031	-0.401841	0.0106018	-0.47188	-0.332973	0.412036	0.369668	0.565556
	p-CDK2(T160)[00m]	-0.119932		p-ERBB4(Y1284)[05m]	-0.584967		p-RAF(C-)(S338)[05m]	0.375516	0.179774	0.353006	0.256705	-0.35738	-0.0759107	0.172585	0.404996	0.449907	0.127768	0.310137	0.177045	0.0160463	0.510238	0.254618	0.0882926	0.24855	0.277738	-0.117484	0.0845715	0.0840105	6.84784e-07	0.836601	0.67391	0.0378297	-0.241218	0.0281306	0.115183	-0.53462	-0.568009	0.360434	-0.542787	-0.539427	0.084334	-0.744963	-0.703103	0.221598	-0.603422	-0.521654	0.582967	0.468273	0.428145
	p-EGFR(Y1086)[00m]	-0.118709		p-JAK1(Y1022/1023)[05m]	-0.592086		p-RAF(C-)(S338)[15m]	0.56243	0.458329	0.547937	0.397499	-0.103889	-0.00799147	0.170214	0.376099	0.567339	-0.036895	0.229516	0.162431	0.0761168	0.349706	0.296907	-0.158358	0.0621773	0.188107	-0.0938934	0.152948	-0.125027	0.0512139	0.72975	0.733123	-0.0200625	-0.300591	-0.229007	0.254792	-0.467552	-0.441897	0.449974	-0.572579	-0.520505	0.137992	-0.618237	-0.612951	0.206589	-0.533342	-0.395786	0.496742	0.290424	0.353884
	p-IGF1RB (Y1135/1136) /…[00m]	0.117389		p-MTOR(S2448)[15m]	-0.596814		p-S6RIBPROT(S240/244)[00m]	-0.135825	-0.276559	-0.139092	0.0158554	-0.254972	-0.325863	-0.41487	0.0232654	0.151345	0.597785	0.357568	0.28805	-0.368717	-0.185268	-0.0591785	0.571693	0.414896	0.459616	0.0621828	0.251809	0.22243	0.538631	0.525313	0.422546	0.207017	-0.0957548	0.0116425	-0.578901	-0.219483	-0.200878	-0.312138	-0.0683395	-0.163767	-0.342978	-0.300574	-0.163449	-0.168652	-0.0128115	-0.139927	0.318283	0.593405	0.702889
	p-RAF(C-)(S338)[05m]	-0.111418		p-FAK(Y576/577)[05m]	-0.602671		p-S6RIBPROT(S240/244)[05m]	0.261031	-0.0477678	-0.141058	0.275113	-0.141533	-0.102436	-0.505443	-0.417234	-0.39498	0.871931	0.832958	0.795079	0.280347	0.253315	-0.311697	0.545354	0.687336	0.668713	0.100938	0.284582	0.4775	0.137321	0.519589	0.310582	0.53376	0.187029	0.453373	-0.29317	-0.740943	-0.741805	0.151926	-0.485194	-0.59615	-0.0194202	-0.608501	-0.476548	0.0666806	-0.390252	-0.502428	0.273915	0.224591	0.247482
	p-FGFR1(Y653/654)[00m]	-0.10853		p-FAK(Y576/577)[15m]	-0.623004		p-S6RIBPROT(S240/244)[15m]	0.34833	0.130631	-0.120549	0.464986	0.179863	0.0987102	-0.370879	-0.368643	-0.342751	0.78289	0.832447	0.850659	0.334907	0.16054	-0.420946	0.559323	0.731248	0.775022	0.331694	0.494049	0.471133	0.0711016	0.27671	0.185043	0.642737	0.436195	0.523034	-0.169545	-0.723228	-0.684502	0.18481	-0.632074	-0.678366	0.166927	-0.558721	-0.426037	0.224199	-0.426974	-0.490859	0.254833	-0.0965453	0.0929562
	p-S6RIBPROT(S240/244)[05m]	-0.107802		p-GAB1(Y627)[15m]	-0.630826		p-SAPK/JNK(T183/Y185)[00m]	-0.308085	0.0467812	0.0449687	-0.440905	0.417195	0.540332	-0.254791	-0.423636	-0.284799	-0.102385	-0.216075	0.0206123	0.333954	0.202396	0.0682101	-0.254256	-0.363572	-0.368972	-0.25364	-0.360939	-0.0862805	0.217016	-0.383021	-0.397078	-0.110184	-0.0439974	-0.12362	-0.131979	0.144012	0.227882	-0.275784	0.0170316	0.0886124	-0.296985	0.173787	0.183995	-0.446648	0.0179786	0.082501	-0.728367	-0.554167	-0.443939
	p-EGFR(Y1173)[00m]	0.105087		p-SHP2(Y542)[15m]	-0.63195		p-SAPK/JNK(T183/Y185)[05m]	-0.00546032	0.142105	0.157732	-0.312512	0.329296	0.58478	-0.29025	-0.539368	-0.430995	-0.0232296	-0.00534906	0.219733	0.636476	0.534036	0.140134	-0.358414	-0.286128	-0.310231	-0.42463	-0.449007	-0.0836362	-0.0691812	-0.189429	-0.251481	-0.0844494	-0.103495	-0.0725743	0.0221808	-0.165991	-0.0981478	0.0740276	-0.19914	-0.113272	-0.175217	-0.0834406	-0.0668195	-0.404741	-0.238073	-0.122397	-0.666925	-0.591769	-0.531352
	p-PLCG1(Y783)[00m]	-0.102475		p-PDFGRA(Y849)/…[05m]	-0.634251		p-SAPK/JNK(T183/Y185)[15m]	0.0834179	-0.0291611	-0.0441019	-0.274085	0.0461874	0.235574	-0.447515	-0.61898	-0.611266	0.0741112	-0.0471215	0.196056	0.687713	0.45056	0.182664	-0.286607	-0.200117	-0.229778	-0.485315	-0.477812	-0.0638028	-0.257048	-0.22829	-0.227196	0.0431028	-0.169121	-0.0136773	-0.0421949	-0.112584	-0.1624	0.167619	-0.0317438	-0.0347236	-0.122452	0.0197861	-0.0503978	-0.317304	-0.0745193	-0.0574252	-0.537059	-0.466866	-0.473134
	p-CDK2(T160)[15m]	0.0976334		p-PDGFRB(Y1009)[05m]	-0.634731		p-SHC(Y239/240)[00m]	0.207238	0.232206	0.208585	-0.118119	0.283652	0.558233	-0.011211	-0.354733	-0.382233	0.06578	0.0771952	0.263055	0.852157	0.677664	0.211535	-0.227066	-0.116513	-0.158246	-0.298914	-0.333583	-0.114817	-0.166826	-0.187105	-0.125308	0.10681	0.0178499	0.11899	0.300886	-0.393745	-0.361125	0.398156	-0.425073	-0.332833	0.0706967	-0.244252	-0.310362	-0.00353901	-0.414759	-0.320563	-0.275231	-0.524223	-0.452779
	p-P90RSK(S380)[15m]	-0.0949277		p-PDGFRB(Y1009)[15m]	-0.648167		p-SHC(Y239/240)[05m]	0.0505154	0.128957	-0.111169	-0.0650861	0.165829	0.384122	-0.0926008	-0.361712	-0.47005	-0.127197	-0.000959395	0.133759	0.497078	0.511078	-0.0426174	-0.175089	-0.0402088	-0.0877094	-0.0728008	-0.171232	0.149052	-0.445104	-0.21919	-0.487657	0.114484	0.214131	0.137525	0.090791	-0.0614775	-0.179584	0.189643	-0.159682	-0.209541	0.177746	-0.139724	-0.226485	-0.0517782	-0.349723	-0.273296	-0.523031	-0.599204	-0.735952
	p-SRC(Y527)[00m]	-0.0806663		p-PDFGRA(Y849)/…[15m]	-0.658942		p-SHC(Y239/240)[15m]	0.143629	0.272935	-0.0047952	0.00167156	0.40441	0.315695	-0.0215583	-0.382521	-0.306942	-0.314219	-0.242737	0.000851155	0.422829	0.0174589	0.0551778	-0.450797	-0.310419	-0.285754	-0.0198856	-0.119529	-0.225381	-0.322281	-0.590922	-0.450279	0.0130762	0.143991	-0.159445	0.266548	0.25737	0.265362	0.125505	0.0185546	0.0891522	0.213146	0.315171	0.205803	-0.101816	0.1015	0.183432	-0.630345	-0.832361	-0.729074
	p-RAF(C-)(S338)[15m]	-0.0800924		p-SRC(Y416)[15m]	-0.67118		p-SHP2(Y542)[00m]	-0.321264	-0.357667	-0.56187	-0.0649017	-0.0569519	-0.165361	-0.376355	-0.381458	-0.467614	0.674526	0.364238	0.405697	0.0834971	-0.0923504	-0.399218	0.808387	0.644705	0.600013	0.365498	0.364844	0.506401	0.36248	-0.0928658	-0.279923	0.545561	0.472426	0.51603	-0.463644	-0.170209	-0.21677	-0.26489	-0.0676358	-0.20783	-0.0226135	-0.0933431	-0.000783783	-0.00711155	0.0202552	-0.220898	0.051199	0.0198208	0.0634059
	p-STAT3(S727)[00m]	-0.0784778		p-STAT3(Y705)[15m]	-0.691815		p-SHP2(Y542)[05m]	-0.628805	-0.671614	-0.384303	-0.627043	-0.143211	-0.11079	-0.629119	-0.344598	-0.386374	0.0305418	-0.315166	-0.238876	-0.0989465	-0.039615	0.167409	0.105649	-0.152007	-0.268965	-0.532999	-0.399452	0.131424	0.0733486	-0.20295	-0.361772	-0.222798	-0.20173	-0.0355414	-0.734395	0.328083	0.282238	-0.505443	0.590006	0.50597	-0.58954	0.361786	0.318168	-0.603445	0.414381	0.202594	-0.348379	0.172414	0.12264
	p-AKT(S473)[05m]	0.0744574		p-SRC(Y416)[05m]	-0.699512		p-SHP2(Y542)[15m]	-0.432655	-0.524543	-0.227531	-0.623553	-0.104703	0.181827	-0.468659	-0.365173	-0.503845	0.1665	-0.183619	-0.0370149	0.323757	0.393163	0.271667	0.0512693	-0.170908	-0.287994	-0.654168	-0.619009	0.0135369	-0.0191105	-0.210235	-0.258267	-0.184127	-0.259709	0.0756047	-0.461699	0.00200149	-0.0367057	-0.20506	0.284706	0.282167	-0.527196	0.127223	0.07122	-0.482022	0.105977	0.0200719	-0.300318	0.059939	0.0125943
	p-PTEN(S380)[00m]	-0.0716923		p-PYK2(Y402)[15m]	-0.70446		p-SRC(Y416)[00m]	-0.554859	-0.383641	-0.411702	-0.244964	0.331575	0.231953	-0.0469945	-0.0949643	-0.324896	0.0146087	-0.182183	-0.139223	0.117908	0.0239702	-0.101957	0.489174	0.215253	0.147232	0.127712	0.0925078	0.171655	0.0599145	-0.505159	-0.618196	0.177529	0.441415	0.204854	-0.371872	0.0577591	0.0460386	-0.161061	0.125765	0.0847763	-0.0240544	0.152224	0.0557247	0.0178519	-0.0541353	-0.192366	-0.114339	-0.159314	-0.160257
	p-CRKL(Y207)[00m]	-0.0705345		p-STAT6(Y641)[05m]	-0.709109		p-SRC(Y416)[05m]	-0.744367	-0.450561	-0.15271	-0.71193	-0.10408	-0.00556246	-0.124401	0.00247552	0.0281627	-0.170236	-0.560679	-0.472145	-0.378032	-0.225281	0.218536	-0.0258925	-0.435677	-0.483645	-0.289568	-0.427208	-0.0918513	0.445384	-0.306003	-0.338688	-0.393469	-0.30201	-0.138538	-0.389573	0.635429	0.634027	-0.684935	0.655107	0.66249	-0.552084	0.507537	0.586457	-0.54426	0.588997	0.489267	-0.358996	0.195946	0.153112
	p-P90RSK(S380)[00m]	-0.0690789		p-ZAP70(Y319)/SYK(Y352)[15m]	-0.714236		p-SRC(Y416)[15m]	-0.692741	-0.310605	-0.0201995	-0.66207	0.120046	0.235373	-0.0451851	0.0384311	0.0627169	-0.166692	-0.481219	-0.382517	-0.346036	-0.218601	0.152895	-0.0774268	-0.474775	-0.506708	-0.245067	-0.399667	-0.188375	0.470143	-0.408289	-0.345029	-0.431027	-0.225607	-0.12919	-0.318238	0.544104	0.602271	-0.703375	0.526803	0.58171	-0.574882	0.472648	0.534609	-0.540743	0.47263	0.439503	-0.407735	0.0584609	0.106982
	p-STAT3(S727)[05m]	-0.0687161		p-SHP2(Y542)[05m]	-0.715697		p-SRC(Y527)[00m]	0.126486	-0.0711964	-0.420656	0.260968	0.191498	0.059951	-0.18225	-0.513027	-0.697474	0.379612	0.300438	0.385359	0.60341	0.206312	-0.303129	0.458787	0.549217	0.525009	0.355429	0.338723	0.343	-0.321616	-0.349273	-0.509176	0.749214	0.608733	0.533574	-0.0144443	-0.327096	-0.449056	0.294737	-0.285259	-0.404526	0.441532	-0.17402	-0.226283	0.374672	-0.229101	-0.391936	-0.0546204	-0.461579	-0.478641
	p-AKT(S473)[15m]	0.0680912		p-SYK(Y525/526)[15m]	-0.730895		p-SRC(Y527)[05m]	-0.0456994	-0.0353401	-0.311271	0.0145796	0.386144	0.336321	-0.253742	-0.550522	-0.692593	0.286046	0.264587	0.387203	0.578633	0.312533	-0.274635	0.285536	0.357607	0.270809	0.110954	0.168039	0.321795	-0.237115	-0.422923	-0.600148	0.418386	0.573953	0.467241	-0.105512	-0.271233	-0.307598	0.090196	-0.235861	-0.303728	0.169981	-0.0695441	-0.132246	-0.010362	-0.215785	-0.356259	-0.308277	-0.579872	-0.536541
	p-P90RSK(S380)[05m]	-0.0620541		p-PLCG1(Y783)[05m]	-0.742124		p-SRC(Y527)[15m]	-0.0180106	0.0841032	-0.202076	0.0122713	0.413691	0.524317	-0.197852	-0.508482	-0.647142	0.147243	0.265315	0.419394	0.549896	0.379827	-0.296297	0.148589	0.25667	0.215211	0.0855589	0.0576863	0.354058	-0.28854	-0.399833	-0.591506	0.266781	0.490341	0.51353	-0.0379036	-0.27944	-0.303148	0.0837645	-0.291111	-0.305909	0.134035	-0.155716	-0.15157	-0.04245	-0.321192	-0.332387	-0.351004	-0.646037	-0.636143
	p-SRC(Y527)[15m]	-0.0598045		p-EGFR(Y1068)[15m]	-0.743175		p-STAT1(Y701)[00m]	0.0039008	0.458268	0.237811	0.13651	0.555272	0.376223	0.403426	0.103614	0.248375	-0.226837	-0.0855587	-0.0329922	-0.0563213	-0.232981	-0.199633	-0.138955	-0.16086	-0.0531726	0.486173	0.2933	-0.182986	0.299695	-0.343288	-0.232869	0.100459	0.310835	-0.0814894	0.365226	0.177971	0.27708	-0.128835	-0.208066	-0.13118	0.234292	0.0902328	0.150892	0.145933	-0.0371729	0.0502103	-0.274183	-0.522461	-0.345247
	p-PDGFRB(Y1009)[00m]	-0.05952		p-GAB1(Y627)[05m]	-0.746911		p-STAT1(Y701)[05m]	-0.648117	-0.481101	-0.083307	-0.708263	-0.0921626	-0.0169652	-0.117268	0.0391683	-0.00202376	-0.33267	-0.664908	-0.652647	-0.332683	-0.218229	0.30927	-0.283066	-0.639953	-0.747297	-0.484745	-0.597733	-0.288746	0.151828	-0.348475	-0.303313	-0.485161	-0.3926	-0.317666	-0.323553	0.656613	0.631096	-0.543198	0.782277	0.76986	-0.564278	0.589987	0.519164	-0.44221	0.571603	0.507636	-0.415624	0.209869	0.112158
	p-PTEN(S380)[05m]	-0.0552967		p-STAT6(Y641)[15m]	-0.77674		p-STAT1(Y701)[15m]	-0.522205	-0.37062	0.0827657	-0.727041	-0.194736	0.0703604	-0.211473	0.0830318	0.101871	-0.325911	-0.64398	-0.579659	-0.215288	-0.0106091	0.52564	-0.397782	-0.712678	-0.802986	-0.702837	-0.77452	-0.325294	0.186735	-0.119057	-0.0275662	-0.610691	-0.647127	-0.44814	-0.359135	0.483011	0.478247	-0.422209	0.634175	0.655858	-0.723991	0.422394	0.276923	-0.515604	0.376942	0.434303	-0.341215	0.333441	0.23139
	p-PKCPAN/G(T514)[15m]	0.0530853		p-FGFR1(Y653/654)[05m]	-0.779955		p-STAT3(S727)[00m]	0.745375	0.743111	0.505948	0.474986	0.161776	0.124558	0.541433	0.0529809	0.179316	-0.218816	0.12709	0.137968	0.496826	0.244908	0.0979751	-0.482065	-0.117697	-0.0259465	0.231772	0.157494	-0.385328	-0.219877	0.0584688	0.230971	0.171413	0.0505341	-0.134981	0.926322	-0.269402	-0.246452	0.700748	-0.542996	-0.473286	0.639606	-0.275203	-0.305135	0.422401	-0.362311	-0.215334	0.0331792	-0.462881	-0.436839
	p-AKT(S473)[00m]	-0.0460359		p-EGFR(Y1068)[05m]	-0.780727		p-STAT3(S727)[05m]	0.39501	0.368597	0.123232	0.352469	0.0559839	0.222529	0.0603764	-0.00768292	-0.104327	0.00899327	0.370493	0.337169	0.305386	0.515994	-0.150952	-0.0112713	0.304043	0.256688	0.0980261	0.237182	0.29204	-0.427099	0.26507	-0.0612199	0.142851	0.253536	0.189382	0.201383	-0.397053	-0.4659	0.359723	-0.502215	-0.551024	0.322497	-0.458114	-0.536936	0.176768	-0.571985	-0.550866	0.072433	-0.255789	-0.366061
	p-4EBP1(T37/46)[15m]	-0.0416762		p-SYK(Y525/526)[05m]	-0.781192		p-STAT3(S727)[15m]	0.169794	0.126122	0.159592	0.162219	0.171545	0.150021	0.00662676	-0.060196	0.00228762	-0.10959	-0.0254403	0.0391819	0.26078	0.0499642	0.287227	-0.038608	0.113734	0.0630058	0.0019945	0.189901	-0.111767	-0.15284	-0.166372	-0.0898693	0.117679	0.160268	0.0483505	0.0569038	-0.118725	-0.049239	0.200059	-0.214663	-0.17986	0.166573	-0.112627	-0.226819	0.0517168	-0.162313	-0.261662	0.0423859	-0.266005	-0.114778
	p-CDK2(T160)[05m]	0.0387937		p-FGFR1(Y653/654)[15m]	-0.78802		p-STAT3(Y705)[00m]	0.664918	0.59761	0.204057	0.647045	0.290041	0.00851248	0.366695	-0.132234	-0.120764	-0.279402	0.155682	0.135128	0.407072	-0.0926609	-0.247856	-0.304498	0.0902808	0.177655	0.461768	0.413861	-0.0648963	-0.461497	-0.245281	-0.181984	0.336715	0.345079	0.17406	0.754616	-0.180655	-0.213141	0.621632	-0.329067	-0.340427	0.748459	-0.0608828	-0.142432	0.603948	-0.142852	-0.135572	0.132833	-0.505436	-0.591424
	p-IRS1(S1101)[05m]	0.0386195		p-PLCG1(Y783)[15m]	-0.791062		p-STAT3(Y705)[05m]	-0.201524	-0.102257	0.150383	-0.102559	-0.209103	-0.301523	0.302725	0.612826	0.628357	-0.211536	-0.250735	-0.434162	-0.762324	-0.391434	0.0177265	-0.0627505	-0.259676	-0.195823	0.0547813	0.00937818	-0.293848	0.291265	0.270949	0.359304	-0.35106	-0.273722	-0.371934	-0.0285871	0.340361	0.358321	-0.326872	0.314645	0.305465	-0.178969	0.122243	0.210463	-0.0581324	0.19094	0.228157	0.168436	0.533901	0.483879
	p-PKCPAN/G(T514)[05m]	0.0366176		p-EGFR(Y1173)[15m]	-0.796676		p-STAT3(Y705)[15m]	-0.235234	-0.045257	0.200804	-0.186885	0.0455991	-0.101718	0.30008	0.491731	0.576027	-0.411521	-0.453174	-0.530901	-0.652055	-0.59405	0.0849919	-0.321339	-0.539945	-0.460923	-0.0495006	-0.182419	-0.512676	0.294651	-0.108369	0.236761	-0.525649	-0.373033	-0.550838	0.0614328	0.482056	0.625742	-0.350004	0.449157	0.570049	-0.297406	0.474598	0.497644	-0.139999	0.453527	0.594539	-0.0139435	0.301719	0.352515
	p-GSK3A(S21)[05m]	0.0254177		p-STAT1(Y701)[15m]	-0.797511		p-STAT5(Y694)[00m]	-0.302077	-0.0298937	-0.242435	-0.14764	0.391906	0.382793	0.350105	-0.0930799	-0.352727	0.0129623	-0.064758	-0.023771	0.215199	0.128544	-0.275301	0.215507	0.0618863	0.00295778	0.345065	0.0666417	-0.047065	-0.0620272	-0.625048	-0.681658	0.188402	0.553925	0.221759	0.200438	0.112563	0.0872392	-0.0557768	-0.00870814	-0.0233474	0.265629	0.155104	0.164643	0.0713988	-0.0980656	-0.120645	-0.410988	-0.546321	-0.560943
	p-RAF(C-)(S259)[05m]	-0.0195745		p-EGFR(Y845)[15m]	-0.809169		p-STAT5(Y694)[05m]	-0.341627	-0.304444	-0.0744293	-0.162847	0.130969	0.0402022	0.396701	0.46304	0.130074	-0.498957	-0.456059	-0.598072	-0.331247	-0.118462	0.0690527	-0.0592472	-0.21909	-0.29532	-0.123413	-0.103992	-0.232552	-0.413448	-0.426252	-0.319385	-0.329134	0.121117	-0.0630248	-0.00203892	0.340295	0.328042	-0.0904843	0.409939	0.455322	0.0269308	0.36216	0.278069	0.0823653	0.168549	0.110082	0.0572375	0.0678487	0.00202158
	p-MET(Y1234/1235)[00m]	0.0195592		p-PYK2(Y402)[05m]	-0.809879		p-STAT5(Y694)[15m]	-0.148932	-0.20917	0.0442791	-0.142499	0.0363314	0.178904	0.331911	0.456685	0.130758	-0.496049	-0.452154	-0.498963	-0.0460903	0.213603	0.335106	-0.135245	-0.237937	-0.280347	-0.343248	-0.280837	-0.262195	-0.537513	-0.32519	-0.149967	-0.351043	-0.0642729	-0.0579551	0.0219661	0.153663	0.111823	0.12793	0.207797	0.308416	-0.0197565	0.158191	0.0282297	0.0894595	-0.0455341	0.00577049	0.154952	0.0443124	0.0215294
	p-STAT3(Y705)[00m]	0.0188595		p-EGFR(Y1173)[05m]	-0.825258		p-STAT6(Y641)[00m]	0.367592	0.139203	-0.0475347	0.278791	0.00927577	0.0166879	0.0323781	-0.275255	-0.457063	0.179142	0.242891	0.260063	0.805302	0.446273	0.0262241	0.106385	0.298294	0.247272	0.0486792	0.0257401	0.038564	-0.30715	-0.0339199	-0.0655543	0.414453	0.186209	0.190781	0.312416	-0.548817	-0.590208	0.768927	-0.374541	-0.415187	0.425032	-0.26218	-0.46332	0.467055	-0.408955	-0.455277	0.22356	-0.12217	-0.317657
	p-IRS1(S1101)[00m]	0.0175826		p-PLCG2(Y759)[05m]	-0.831438		p-STAT6(Y641)[05m]	-0.476431	-0.664636	-0.366156	-0.426957	-0.543495	-0.436269	-0.458807	-0.0368176	-0.191124	0.121392	-0.149094	-0.261894	-0.337049	0.0243335	0.0830701	0.25961	0.0268276	-0.0755437	-0.371056	-0.246489	0.245851	0.0297494	0.274466	-0.1122	-0.144625	-0.276239	0.0387932	-0.655773	0.17871	-0.00487755	-0.363021	0.544297	0.327731	-0.466974	0.0452503	-0.00469743	-0.32087	0.220343	0.00152494	0.0583442	0.686426	0.360969
	p-P70S6K(T421/S424)[15m]	-0.0160607		p-EGFR(Y845)[05m]	-0.835868		p-STAT6(Y641)[15m]	-0.323934	-0.450078	-0.0261108	-0.314053	-0.398919	-0.388806	-0.273192	0.216846	0.21562	-0.196944	-0.41318	-0.491319	-0.421105	-0.277844	0.426444	-0.0705396	-0.27651	-0.333476	-0.433812	-0.295249	-0.148305	0.112185	0.139984	0.172286	-0.39166	-0.510781	-0.327161	-0.472914	0.326046	0.290311	-0.261533	0.590351	0.525549	-0.492096	0.267448	0.103307	-0.232277	0.376218	0.246885	0.213914	0.703629	0.561147
	p-P70S6K(T421/S424)[05m]	-0.0151398		p-PLCG2(Y759)[15m]	-0.83609		p-SYK(Y525/526)[00m]	-0.522321	-0.195879	-0.0453988	-0.465785	0.325821	0.445742	0.306802	0.124179	-0.0838395	-0.298945	-0.457144	-0.37148	0.219409	0.230997	0.159783	-0.0225882	-0.33174	-0.369637	-0.118604	-0.356391	-0.277292	0.130776	-0.51088	-0.446482	-0.215542	0.0740253	-0.122961	0.0576449	0.221246	0.269864	-0.0618643	0.161746	0.259669	-0.031455	0.247637	0.184864	-0.0688099	-0.0523099	-0.010419	-0.318428	-0.274481	-0.263571
	p-ZAP70(Y319)/SYK(Y352)[00m]	-0.0145491		p-MET(Y1234/1235)[15m]	-0.840251		p-SYK(Y525/526)[05m]	-0.568766	-0.27921	-0.105198	-0.462259	-0.107017	-0.166803	0.0108947	0.175567	0.192306	-0.281898	-0.460966	-0.510534	-0.718149	-0.543707	-0.130461	-0.189473	-0.51412	-0.488473	-0.0223036	-0.267686	-0.180988	0.354741	-0.171368	-0.186588	-0.460743	-0.295001	-0.333579	-0.22771	0.690438	0.698062	-0.693797	0.719361	0.693777	-0.453625	0.558965	0.630368	-0.37116	0.59889	0.606574	-0.350934	0.294331	0.113356
	p-PDK1(S241)[05m]	0.0136506		p-MET(Y1234/1235)[05m]	-0.844553		p-SYK(Y525/526)[15m]	-0.482546	-0.400552	-0.164034	-0.501814	-0.278636	-0.27398	-0.260705	0.0819096	0.146531	0.0337739	-0.34288	-0.306355	-0.533827	-0.441102	0.101206	-0.0210144	-0.369428	-0.355347	-0.271333	-0.362281	-0.162684	0.455889	-0.0586122	0.1095	-0.423675	-0.453518	-0.29409	-0.421503	0.523779	0.515385	-0.623771	0.653111	0.627193	-0.610881	0.491881	0.514836	-0.489422	0.603914	0.599923	-0.129246	0.448081	0.464639
	p-PDGFRA(Y754)[00m]	0.00713279		p-STAT1(Y701)[05m]	-0.851694		p-ZAP70(Y319)/SYK(Y352)[00m]	0.743338	0.585798	0.478931	0.444176	-0.0173051	0.0645714	0.35645	0.0205721	0.0833723	0.00570299	0.330653	0.332315	0.559407	0.418642	0.132091	-0.321185	0.0711296	0.0982961	0.00799168	0.0617663	-0.270433	-0.224104	0.254451	0.394779	0.0665036	-0.0900884	-0.0505786	0.73956	-0.511705	-0.454325	0.749974	-0.590182	-0.501977	0.485223	-0.382052	-0.426655	0.289333	-0.431975	-0.353142	0.277666	-0.177769	-0.197871
	p-S6RIBPROT(S240/244)[15m]	0.0057887		p-EGFR(Y1086)[15m]	-0.856754		p-ZAP70(Y319)/SYK(Y352)[05m]	0.243826	-0.199172	0.0658896	0.0735478	-0.674179	-0.490201	-0.11922	0.185272	0.184303	0.0493999	0.0243896	-0.111741	-0.125729	0.192019	0.295961	-0.0552602	0.0444965	0.0103144	-0.340803	-0.156344	0.0719455	-0.221863	0.654008	0.487075	-0.0273953	-0.478197	-0.0426941	-0.0724311	-0.120246	-0.261077	0.190984	0.0585322	-0.00744686	-0.0873912	-0.2861	-0.291283	0.146375	-0.00582106	-0.0486205	0.49237	0.655866	0.449348
	p-CREB(S133)[00m]	-0.0051807		p-EGFR(Y1086)[05m]	-0.863216		p-ZAP70(Y319)/SYK(Y352)[15m]	0.252882	-0.0346319	0.240281	0.0274221	-0.43512	-0.441023	-0.0405408	0.19026	0.37672	-0.220789	-0.257801	-0.29439	-0.251696	-0.299746	0.381087	-0.428969	-0.346781	-0.32013	-0.335936	-0.265464	-0.33843	-0.0472966	0.289451	0.545599	-0.282892	-0.646985	-0.428348	0.0996324	0.211545	0.243349	0.0599591	0.269493	0.338864	-0.16795	0.189085	0.163308	-0.00627971	0.390305	0.439621	0.251163	0.419178	0.41164
							Cell Viability in Comparison to Media Alone (24 Hr)	0.501772	0.730586	0.380508	0.528171	0.533713	0.488373	0.486273	0.131128	0.161009	-0.00738179	0.390656	0.40212	0.404863	0.310124	-0.160674	-0.020229	0.247113	0.328562	0.457569	0.43125	-0.071127	-0.064538	-0.00357196	0.0766727	0.247927	0.459579	0.0902452	0.593846	-0.501226	-0.393487	0.519623	-0.787596	-0.709306	0.569399	-0.441902	-0.449414	0.353746	-0.677752	-0.527057	0.0575185	-0.543399	-0.377324
[truncated: 139 more columns]
