# Supplementary material for: The DIONESUS algorithm provides scalable and accurate reconstruction of dynamic phosphoproteomic networks to reveal new drug targets
Source: Royal Society of Chemistry journal article supplement (doi:10.1039/c5ib00065c), 2015-01-01
Supplement: c5ib00065c10.xlsx [file c5ib00065c10.xlsx]

## Sheet: Sheet1
Supplementary Table 5: Weight vector (beta) for regression methods
	*Predictors sorted in descending order by absolute value of beta
	*p-STAT1[5m] is bolded to demonstrate its significance in each algorithm based on beta-value
	Ordinary Least Squares			LASSO			Ridge			Elastic Net			PLS-VIP
	Metric	Beta		Metric	Beta		Metric	Beta		Metric	Beta		Metric	Beta
	'p-ERK(T202/Y204)[15m]'	1.31329		'p-MTOR(S2448)[00m]'	0.498717		'p-STAT1(Y701)[05m]'	-0.325622		'p-MTOR(S2448)[00m]'	0.498717		'p-PDK1(S241)[15m]'	0.0483709
	'p-P38MAPK(T180/Y182)[00m]'	1.27496		'p-STAT1(Y701)[05m]'	-0.469238		'p-MTOR(S2448)[00m]'	0.238826		'p-STAT1(Y701)[05m]'	-0.469238		'p-STAT1(Y701)[05m]'	-0.0468021
	'p-P38MAPK(T180/Y182)[05m]'	1.1715		'p-P70S6K(T421/S424)[05m]'	0.275892		'p-P70S6K(T421/S424)[05m]'	0.194026		'p-P70S6K(T421/S424)[05m]'	0.275892		'p-ERK(T202/Y204)[05m]'	0.0448629
	'p-STAT3(S727)[05m]'	1.1463		'p-ZAP70(Y319)/SYK(Y352)[05m]'	-0.197852		'p-PDGFRB(Y1009)[15m]'	-0.155198		'p-ZAP70(Y319)/SYK(Y352)[05m]'	-0.197852		'p-ZAP70(Y319)/SYK(Y352)[05m]'	-0.0394303
	'p-SRC(Y416)[15m]'	1.0708		'p-PLCG2(Y759)[05m]'	-0.18486		'p-FGFR1(Y653/654)[15m]'	-0.15405		'p-PLCG2(Y759)[05m]'	-0.18486		'p-STAT1(Y701)[15m]'	-0.0359945
	'p-P38MAPK(T180/Y182)[15m]'	-0.818961		'p-FGFR1(Y653/654)[15m]'	-0.177109		'p-ZAP70(Y319)/SYK(Y352)[05m]'	-0.139524		'p-FGFR1(Y653/654)[15m]'	-0.177109		'p-ZAP70(Y319)/SYK(Y352)[15m]'	-0.035913
	'p-STAT3(Y705)[05m]'	0.762198		'p-ABL(C-)(Y245)[05m]'	0.168949		'p-SYK(Y525/526)[05m]'	-0.123166		'p-ABL(C-)(Y245)[05m]'	0.168949		'p-PLCG2(Y759)[15m]'	-0.0357927
	'p-4EBP1(T37/46)[15m]'	-0.543387		'p-PDGFRB(Y1009)[15m]'	-0.124352		'p-RAF(C-)(S338)[00m]'	0.111576		'p-PDGFRB(Y1009)[15m]'	-0.124352		'p-MET(Y1349)[15m]'	0.0353917
	'p-EGFR(Y1068)[15m]'	0.541871		'p-CDC2(Y15)[15m]'	0.09786		'p-STAT3(S727)[05m]'	0.110904		'p-CDC2(Y15)[15m]'	0.09786		'p-EGFR(Y1086)[05m]'	-0.0353041
	'p-EGFR(Y1086)[05m]'	-0.534004		'p-STAT3(S727)[05m]'	0.0902288		'p-ZAP70(Y319)/SYK(Y352)[15m]'	-0.0945694		'p-STAT3(S727)[05m]'	0.0902288		'p-S6RIBPROT(S240/244)[15m]'	0.0344554
	'p-KIT(C-)(Y719)[05m]'	-0.522587		'p-ZAP70(Y319)/SYK(Y352)[15m]'	-0.0700174		'p-PLCG2(Y759)[05m]'	-0.0832754		'p-ZAP70(Y319)/SYK(Y352)[15m]'	-0.0700174		'p-EGFR(Y845)[05m]'	-0.0339807
	'p-PDGFRA(Y754)[05m]'	-0.452185		'p-ERK(T202/Y204)[15m]'	0.0551181		'p-PDK1(S241)[00m]'	0.0779505		'p-ERK(T202/Y204)[15m]'	0.0551181		'p-CDK2(T160)[15m]'	0.0338261
	'p-ERK(T202/Y204)[05m]'	-0.452097		'p-PDK1(S241)[00m]'	0.0309222		'p-RAF(C-)(S259)[15m]'	0.0576513		'p-PDK1(S241)[00m]'	0.0309222		'p-PLCG2(Y759)[05m]'	-0.0331766
	'p-S6RIBPROT(S240/244)[00m]'	0.44675		'p-EGFR(Y845)[00m]'	-0.0198577		'p-STAT6(Y641)[15m]'	-0.0497954		'p-EGFR(Y845)[00m]'	-0.0198577		'p-RAF(C-)(S259)[15m]'	0.0328863
	'p-IGF1RB (Y1135/1136) /…[15m]'	0.374559		'p-AKT(S473)[15m]'	0		'p-PDK1(S241)[05m]'	0.0417479		'p-AKT(S473)[15m]'	0		'p-PDGFRB(Y1009)[05m]'	-0.0321207
	'p-AKT(S473)[00m]'	-0.368213		'p-S6RIBPROT(S240/244)[15m]'	0		'p-ZAP70(Y319)/SYK(Y352)[00m]'	0.0391168		'p-S6RIBPROT(S240/244)[15m]'	0		'p-RAF(C-)(S338)[15m]'	0.0318985
	'p-PDFGRA(Y849)/…[15m]'	0.289117		'p-EGFR(Y1086)[05m]'	0		'p-PDGFRB(Y1009)[05m]'	-0.0261021		'p-EGFR(Y1086)[05m]'	0		'p-FGFR1(Y653/654)[05m]'	-0.0307511
	'p-PDK1(S241)[15m]'	0.264888		'p-EGFR(Y1086)[15m]'	0		'p-PLCG2(Y759)[15m]'	-0.0239923		'p-EGFR(Y1086)[15m]'	0		'p-ERBB2(Y1221/1222)[05m]'	-0.0305453
	'p-EGFR(Y1173)[15m]'	0.233816		'p-CDK2(T160)[15m]'	0		'p-ABL(C-)(Y245)[05m]'	0.0230294		'p-CDK2(T160)[15m]'	0		'p-PDFGRA(Y849)/…[05m]'	-0.0302608
	'p-STAT5(Y694)[15m]'	0.200797		'p-AKT(S473)[05m]'	0		'p-PLCG1(Y783)[15m]'	-0.0216814		'p-AKT(S473)[05m]'	0		'p-PLCG1(Y783)[15m]'	-0.0294678
	'p-SHC(Y239/240)[15m]'	-0.18465		'p-CDK2(T160)[05m]'	0		'p-PDK1(S241)[15m]'	0.00901279		'p-CDK2(T160)[05m]'	0		'p-PDFGRA(Y849)/…[15m]'	-0.0288932
	'p-STAT1(Y701)[05m]'	-0.184556		'p-PDK1(S241)[15m]'	0		'p-ERK(T202/Y204)[15m]'	0.00706089		'p-PDK1(S241)[15m]'	0		'p-AKT(S473)[15m]'	0.028824
	'p-IGF1RB (Y1135/1136) /…[05m]'	-0.184472		'p-PKCPAN/G(T514)[05m]'	0		'p-STAT1(Y701)[15m]'	-0.00668768		'p-PKCPAN/G(T514)[05m]'	0		'p-PDK1(S241)[05m]'	0.0283994
	'p-PKCPAN/G(T514)[15m]'	-0.150993		'p-RAF(C-)(S338)[15m]'	0		'p-PLCG1(Y783)[05m]'	-0.000506602		'p-RAF(C-)(S338)[15m]'	0		'p-JAK1(Y1022/1023)[05m]'	-0.0282353
	'p-4EBP1(S65)[05m]'	0.0252162		'p-PKCPAN/G(T514)[15m]'	0		'p-AKT(S473)[15m]'	0		'p-PKCPAN/G(T514)[15m]'	0		'p-CDK2(T160)[05m]'	0.0279728
	'p-AKT(S473)[15m]'	0		'p-PLCG2(Y759)[15m]'	0		'p-S6RIBPROT(S240/244)[15m]'	0		'p-PLCG2(Y759)[15m]'	0		'p-GAB2(S159)[15m]'	0.0276954
	'p-S6RIBPROT(S240/244)[15m]'	0		'p-P38MAPK(T180/Y182)[00m]'	0		'p-EGFR(Y1086)[05m]'	0		'p-P38MAPK(T180/Y182)[00m]'	0		'p-PLCG1(Y783)[05m]'	-0.0257898
	'p-EGFR(Y1086)[15m]'	0		'p-EGFR(Y1068)[15m]'	0		'p-EGFR(Y1086)[15m]'	0		'p-EGFR(Y1068)[15m]'	0		'p-MET(Y1234/1235)[05m]'	-0.0251694
	'p-CDK2(T160)[15m]'	0		'p-RAF(C-)(S338)[05m]'	0		'p-CDK2(T160)[15m]'	0		'p-RAF(C-)(S338)[05m]'	0		'p-RAF(C-)(S338)[05m]'	0.0251376
	'p-AKT(S473)[05m]'	0		'p-EGFR(Y845)[05m]'	0		'p-AKT(S473)[05m]'	0		'p-EGFR(Y845)[05m]'	0		'p-GAB2(S159)[05m]'	0.025127
	'p-CDK2(T160)[05m]'	0		'p-MEK(1/2)(S217/221)[00m]'	0		'p-CDK2(T160)[05m]'	0		'p-MEK(1/2)(S217/221)[00m]'	0		'p-STAT6(Y641)[15m]'	-0.0247326
	'p-PKCPAN/G(T514)[05m]'	0		'p-GAB2(S159)[15m]'	0		'p-PKCPAN/G(T514)[05m]'	0		'p-GAB2(S159)[15m]'	0		'p-FGFR1(Y653/654)[15m]'	-0.0247246
	'p-RAF(C-)(S338)[15m]'	0		'p-MET(Y1234/1235)[05m]'	0		'p-RAF(C-)(S338)[15m]'	0		'p-MET(Y1234/1235)[05m]'	0		'p-ERBB4(Y1284)[05m]'	-0.0241127
	'p-PLCG2(Y759)[05m]'	0		'p-STAT1(Y701)[15m]'	0		'p-PKCPAN/G(T514)[15m]'	0		'p-STAT1(Y701)[15m]'	0		'p-P38MAPK(T180/Y182)[05m]'	0.0236564
	'p-PLCG2(Y759)[15m]'	0		'p-GAB2(S159)[05m]'	0		'p-P38MAPK(T180/Y182)[00m]'	0		'p-GAB2(S159)[05m]'	0		'p-PDGFRB(Y1009)[15m]'	-0.0235898
	'p-RAF(C-)(S338)[05m]'	0		'p-PDK1(S241)[05m]'	0		'p-EGFR(Y1068)[15m]'	0		'p-PDK1(S241)[05m]'	0		'p-4EBP1(T37/46)[15m]'	0.0235292
	'p-EGFR(Y845)[05m]'	0		'p-EGFR(Y1068)[05m]'	0		'p-RAF(C-)(S338)[05m]'	0		'p-EGFR(Y1068)[05m]'	0		'p-FOXO3A(S253)[15m]'	0.0229703
	'p-MEK(1/2)(S217/221)[00m]'	0		'p-ERK(T202/Y204)[05m]'	0		'p-EGFR(Y845)[05m]'	0		'p-ERK(T202/Y204)[05m]'	0		'p-CDK2(T160)[00m]'	0.0226645
	'p-GAB2(S159)[15m]'	0		'p-PDFGRA(Y849)/…[15m]'	0		'p-MEK(1/2)(S217/221)[00m]'	0		'p-PDFGRA(Y849)/…[15m]'	0		'p-EGFR(Y845)[15m]'	-0.0215713
	'p-MET(Y1234/1235)[05m]'	0		'p-EGFR(Y1173)[05m]'	0		'p-GAB2(S159)[15m]'	0		'p-EGFR(Y1173)[05m]'	0		'p-ERK(T202/Y204)[15m]'	0.0203774
	'p-STAT1(Y701)[15m]'	0		'p-FGFR1(Y653/654)[05m]'	0		'p-MET(Y1234/1235)[05m]'	0		'p-FGFR1(Y653/654)[05m]'	0		'p-FAK(Y576/577)[15m]'	-0.0202037
	'p-GAB2(S159)[05m]'	0		'p-PDFGRA(Y849)/…[05m]'	0		'p-GAB2(S159)[05m]'	0		'p-PDFGRA(Y849)/…[05m]'	0		'p-FAK(Y576/577)[05m]'	-0.0191721
	'p-PDK1(S241)[05m]'	0		'p-FAK(Y576/577)[15m]'	0		'p-EGFR(Y1068)[05m]'	0		'p-FAK(Y576/577)[15m]'	0		'p-STAT6(Y641)[05m]'	-0.0189586
	'p-EGFR(Y1068)[05m]'	0		'p-PLCG1(Y783)[05m]'	0		'p-ERK(T202/Y204)[05m]'	0		'p-PLCG1(Y783)[05m]'	0		'p-RAF(C-)(S338)[00m]'	0.0187584
	'p-EGFR(Y1173)[05m]'	0		'p-EGFR(Y845)[15m]'	0		'p-PDFGRA(Y849)/…[15m]'	0		'p-EGFR(Y845)[15m]'	0		'p-MTOR(S2448)[15m]'	0.0181967
	'p-FGFR1(Y653/654)[05m]'	0		'p-PLCG1(Y783)[15m]'	0		'p-EGFR(Y1173)[05m]'	0		'p-PLCG1(Y783)[15m]'	0		'p-P70S6K(T421/S424)[05m]'	0.0181825
	'p-PDFGRA(Y849)/…[05m]'	0		'p-GSK3A(S21)[05m]'	0		'p-FGFR1(Y653/654)[05m]'	0		'p-GSK3A(S21)[05m]'	0		'p-EGFR(Y1086)[15m]'	-0.0180249
	'p-FAK(Y576/577)[15m]'	0		'p-FOXO1(S319)/…[00m]'	0		'p-PDFGRA(Y849)/…[05m]'	0		'p-FOXO1(S319)/…[00m]'	0		'p-RAF(C-)(S259)[05m]'	0.0178756
	'p-PLCG1(Y783)[05m]'	0		'p-MET(Y1234/1235)[15m]'	0		'p-FAK(Y576/577)[15m]'	0		'p-MET(Y1234/1235)[15m]'	0		'p-4EBP1(S65)[05m]'	0.0175067
	'p-EGFR(Y845)[15m]'	0		'p-IGF1RB (Y1135/1136) /…[05m]'	0		'p-EGFR(Y845)[15m]'	0		'p-IGF1RB (Y1135/1136) /…[05m]'	0		'p-SHC(Y239/240)[05m]'	0.0175054
	'p-PLCG1(Y783)[15m]'	0		'p-ERK(T202/Y204)[00m]'	0		'p-GSK3A(S21)[05m]'	0		'p-ERK(T202/Y204)[00m]'	0		'p-SHP2(Y542)[05m]'	-0.0167364
	'p-GSK3A(S21)[05m]'	0		'p-PYK2(Y402)[05m]'	0		'p-FOXO1(S319)/…[00m]'	0		'p-PYK2(Y402)[05m]'	0		'p-MEK(1/2)(S217/221)[05m]'	0.0163545
	'p-FOXO1(S319)/…[00m]'	0		'p-STAT6(Y641)[15m]'	0		'p-MET(Y1234/1235)[15m]'	0		'p-STAT6(Y641)[15m]'	0		'p-ERBB4(Y1284)[15m]'	-0.0163415
	'p-MET(Y1234/1235)[15m]'	0		'p-KIT(C-)(Y719)[05m]'	0		'p-IGF1RB (Y1135/1136) /…[05m]'	0		'p-KIT(C-)(Y719)[05m]'	0		'p-CDC2(Y15)[05m]'	0.0161479
	'p-ERK(T202/Y204)[00m]'	0		'p-STAT6(Y641)[05m]'	0		'p-ERK(T202/Y204)[00m]'	0		'p-STAT6(Y641)[05m]'	0		'p-AKT(S473)[00m]'	-0.0161387
	'p-PYK2(Y402)[05m]'	0		'p-MEK(1/2)(S217/221)[15m]'	0		'p-PYK2(Y402)[05m]'	0		'p-MEK(1/2)(S217/221)[15m]'	0		'p-P38MAPK(T180/Y182)[00m]'	-0.0161246
	'p-STAT6(Y641)[15m]'	0		'p-SRC(Y416)[05m]'	0		'p-KIT(C-)(Y719)[05m]'	0		'p-SRC(Y416)[05m]'	0		'p-MTOR(S2448)[05m]'	0.0161184
	'p-STAT6(Y641)[05m]'	0		'p-PKCD(T505)[15m]'	0		'p-STAT6(Y641)[05m]'	0		'p-PKCD(T505)[15m]'	0		'p-FOXO3A(S253)[05m]'	0.0160572
	'p-MEK(1/2)(S217/221)[15m]'	0		'p-EGFR(Y1173)[15m]'	0		'p-MEK(1/2)(S217/221)[15m]'	0		'p-EGFR(Y1173)[15m]'	0		'p-PDGFRB(Y1009)[00m]'	-0.015816
	'p-SRC(Y416)[05m]'	0		'p-S6RIBPROT(S240/244)[05m]'	0		'p-SRC(Y416)[05m]'	0		'p-S6RIBPROT(S240/244)[05m]'	0		'p-STAT3(Y705)[15m]'	-0.0157831
	'p-PKCD(T505)[15m]'	0		'p-GAB1(Y627)[00m]'	0		'p-PKCD(T505)[15m]'	0		'p-GAB1(Y627)[00m]'	0		'p-PKCPAN/G(T514)[05m]'	0.0156452
	'p-FGFR1(Y653/654)[15m]'	0		'p-P38MAPK(T180/Y182)[05m]'	0		'p-EGFR(Y1173)[15m]'	0		'p-P38MAPK(T180/Y182)[05m]'	0		'p-JAK1(Y1022/1023)[15m]'	-0.0153739
	'p-S6RIBPROT(S240/244)[05m]'	0		'p-FOXO3A(S253)[05m]'	0		'p-S6RIBPROT(S240/244)[05m]'	0		'p-FOXO3A(S253)[05m]'	0		'p-CRKL(Y207)[00m]'	-0.0146521
	'p-GAB1(Y627)[00m]'	0		'p-SAPK/JNK(T183/Y185)[00m]'	0		'p-GAB1(Y627)[00m]'	0		'p-SAPK/JNK(T183/Y185)[00m]'	0		'p-SHC(Y239/240)[15m]'	0.01446
	'p-FOXO3A(S253)[05m]'	0		'p-RAF(C-)(S259)[15m]'	0		'p-P38MAPK(T180/Y182)[05m]'	0		'p-RAF(C-)(S259)[15m]'	0		'p-JAK1(Y1022/1023)[00m]'	-0.0141104
	'p-SAPK/JNK(T183/Y185)[00m]'	0		'p-SHP2(Y542)[05m]'	0		'p-FOXO3A(S253)[05m]'	0		'p-SHP2(Y542)[05m]'	0		'p-MET(Y1234/1235)[15m]'	-0.013944
	'p-RAF(C-)(S259)[15m]'	0		'p-CDK2(T160)[00m]'	0		'p-SAPK/JNK(T183/Y185)[00m]'	0		'p-CDK2(T160)[00m]'	0		'p-PKCD(T505)[15m]'	0.0138673
	'p-SHP2(Y542)[05m]'	0		'p-IGF1RB (Y1135/1136) /…[15m]'	0		'p-SHP2(Y542)[05m]'	0		'p-IGF1RB (Y1135/1136) /…[15m]'	0		'p-PYK2(Y402)[05m]'	-0.0138395
	'p-CDK2(T160)[00m]'	0		'p-PDGFRB(Y1009)[05m]'	0		'p-CDK2(T160)[00m]'	0		'p-PDGFRB(Y1009)[05m]'	0		'p-SYK(Y525/526)[05m]'	-0.0135643
	'p-PDGFRB(Y1009)[05m]'	0		'p-KIT(C-)(Y719)[00m]'	0		'p-IGF1RB (Y1135/1136) /…[15m]'	0		'p-KIT(C-)(Y719)[00m]'	0		'p-GAB1(Y627)[00m]'	-0.0134952
	'p-KIT(C-)(Y719)[00m]'	0		'p-FOXO3A(S253)[15m]'	0		'p-KIT(C-)(Y719)[00m]'	0		'p-FOXO3A(S253)[15m]'	0		'p-EGFR(Y845)[00m]'	-0.0133812
	'p-FOXO3A(S253)[15m]'	0		'p-FAK(Y576/577)[05m]'	0		'p-FOXO3A(S253)[15m]'	0		'p-FAK(Y576/577)[05m]'	0		'p-PLCG1(Y783)[00m]'	-0.0124769
	'p-FAK(Y576/577)[05m]'	0		'p-IGF1RB (Y1135/1136) /…[00m]'	0		'p-FAK(Y576/577)[05m]'	0		'p-IGF1RB (Y1135/1136) /…[00m]'	0		'p-PDK1(S241)[00m]'	0.0120861
	'p-IGF1RB (Y1135/1136) /…[00m]'	0		'p-KIT(C-)(Y719)[15m]'	0		'p-IGF1RB (Y1135/1136) /…[00m]'	0		'p-KIT(C-)(Y719)[15m]'	0		'p-S6RIBPROT(S240/244)[00m]'	-0.0120222
	'p-KIT(C-)(Y719)[15m]'	0		'p-ERBB4(Y1284)[15m]'	0		'p-KIT(C-)(Y719)[15m]'	0		'p-ERBB4(Y1284)[15m]'	0		'p-MEK(1/2)(S217/221)[00m]'	-0.0118924
	'p-ERBB4(Y1284)[15m]'	0		'p-MET(Y1349)[00m]'	0		'p-ERBB4(Y1284)[15m]'	0		'p-MET(Y1349)[00m]'	0		'p-IRS1(S1101)[00m]'	-0.0118731
	'p-MET(Y1349)[00m]'	0		'p-RAF(C-)(S259)[05m]'	0		'p-MET(Y1349)[00m]'	0		'p-RAF(C-)(S259)[05m]'	0		'p-AKT(S473)[05m]'	0.011676
	'p-RAF(C-)(S259)[05m]'	0		'p-4EBP1(S65)[05m]'	0		'p-RAF(C-)(S259)[05m]'	0		'p-4EBP1(S65)[05m]'	0		'p-ABL(C-)(Y245)[05m]'	0.0113938
	'p-ERBB4(Y1284)[05m]'	0		'p-ERBB4(Y1284)[05m]'	0		'p-4EBP1(S65)[05m]'	0		'p-ERBB4(Y1284)[05m]'	0		'p-4EBP1(T37/46)[00m]'	-0.0110062
	'p-SYK(Y525/526)[05m]'	0		'p-SYK(Y525/526)[05m]'	0		'p-ERBB4(Y1284)[05m]'	0		'p-SYK(Y525/526)[05m]'	0		'p-PKCPAN/G(T514)[15m]'	0.0104598
	'p-STAT3(Y705)[15m]'	0		'p-STAT3(Y705)[15m]'	0		'p-STAT3(Y705)[15m]'	0		'p-STAT3(Y705)[15m]'	0		'p-4EBP1(T37/46)[05m]'	0.010435
	'p-SHP2(Y542)[15m]'	0		'p-SHP2(Y542)[15m]'	0		'p-SHP2(Y542)[15m]'	0		'p-SHP2(Y542)[15m]'	0		'p-STAT5(Y694)[05m]'	-0.0104206
	'p-PTEN(S380)[00m]'	0		'p-PTEN(S380)[00m]'	0		'p-PTEN(S380)[00m]'	0		'p-PTEN(S380)[00m]'	0		'p-MET(Y1349)[00m]'	-0.0103414
	'p-PKCD(T505)[05m]'	0		'p-PKCD(T505)[05m]'	0		'p-PKCD(T505)[05m]'	0		'p-PKCD(T505)[05m]'	0		'p-4EBP1(S65)[00m]'	-0.0102357
	'p-ERBB2(Y1221/1222)[05m]'	0		'p-ERBB2(Y1221/1222)[05m]'	0		'p-ERBB2(Y1221/1222)[05m]'	0		'p-ERBB2(Y1221/1222)[05m]'	0		'p-STAT3(S727)[05m]'	0.0101762
	'p-PDGFRB(Y1009)[00m]'	0		'p-PDGFRB(Y1009)[00m]'	0		'p-PDGFRB(Y1009)[00m]'	0		'p-PDGFRB(Y1009)[00m]'	0		'p-ERBB2(Y1221/1222)[15m]'	-0.0098976
	'p-ZAP70(Y319)/SYK(Y352)[15m]'	0		'p-SRC(Y416)[15m]'	0		'p-SRC(Y416)[15m]'	0		'p-SRC(Y416)[15m]'	0		'p-SRC(Y527)[15m]'	0.00983391
	'p-FOXO1(S319)/…[05m]'	0		'p-FOXO1(S319)/…[05m]'	0		'p-FOXO1(S319)/…[05m]'	0		'p-FOXO1(S319)/…[05m]'	0		'p-CREB(S133)[05m]'	0.00981625
	'p-STAT1(Y701)[00m]'	0		'p-STAT1(Y701)[00m]'	0		'p-STAT1(Y701)[00m]'	0		'p-STAT1(Y701)[00m]'	0		'p-PKCPAN/G(T514)[00m]'	0.00963608
	'p-4EBP1(T37/46)[00m]'	0		'p-4EBP1(T37/46)[00m]'	0		'p-4EBP1(T37/46)[00m]'	0		'p-4EBP1(T37/46)[00m]'	0		'p-STAT3(Y705)[00m]'	-0.0092222
	'p-MET(Y1349)[15m]'	0		'p-MET(Y1349)[15m]'	0		'p-MET(Y1349)[15m]'	0		'p-MET(Y1349)[15m]'	0		'p-MEK(1/2)(S217/221)[15m]'	-0.00917972
	'p-GSK3A(S21)[15m]'	0		'p-GSK3A(S21)[15m]'	0		'p-GSK3A(S21)[15m]'	0		'p-GSK3A(S21)[15m]'	0		'p-PYK2(Y402)[00m]'	0.0091223
	'p-STAT5(Y694)[05m]'	0		'p-STAT5(Y694)[05m]'	0		'p-STAT5(Y694)[05m]'	0		'p-STAT5(Y694)[05m]'	0		'p-ABL(C-)(Y245)[15m]'	0.00903578
	'p-SYK(Y525/526)[00m]'	0		'p-SYK(Y525/526)[00m]'	0		'p-SYK(Y525/526)[00m]'	0		'p-SYK(Y525/526)[00m]'	0		'p-GSK3A(S21)[15m]'	0.00889438
	'p-P70S6K(T421/S424)[05m]'	0		'p-P70S6K(T421/S424)[00m]'	0		'p-P70S6K(T421/S424)[00m]'	0		'p-P70S6K(T421/S424)[00m]'	0		'p-P90RSK(S380)[15m]'	0.00887061
	'p-P70S6K(T421/S424)[00m]'	0		'p-CRKL(Y207)[00m]'	0		'p-CRKL(Y207)[00m]'	0		'p-CRKL(Y207)[00m]'	0		'p-KIT(C-)(Y719)[05m]'	-0.00871481
	'p-CRKL(Y207)[00m]'	0		'p-SRC(Y416)[00m]'	0		'p-SRC(Y416)[00m]'	0		'p-SRC(Y416)[00m]'	0		'p-CRKL(Y207)[05m]'	0.00870573
	'p-SRC(Y416)[00m]'	0		'p-STAT3(Y705)[00m]'	0		'p-STAT3(Y705)[00m]'	0		'p-STAT3(Y705)[00m]'	0		'p-GSK3A(S21)[05m]'	0.00862022
	'p-STAT3(Y705)[00m]'	0		'p-STAT5(Y694)[00m]'	0		'p-STAT5(Y694)[00m]'	0		'p-STAT5(Y694)[00m]'	0		'p-ERBB2(Y1221/1222)[00m]'	-0.00837296
	'p-STAT5(Y694)[00m]'	0		'p-FGFR1(Y653/654)[00m]'	0		'p-FGFR1(Y653/654)[00m]'	0		'p-FGFR1(Y653/654)[00m]'	0		'p-EGFR(Y1173)[00m]'	0.00821474
	'p-FGFR1(Y653/654)[00m]'	0		'p-ERBB4(Y1284)[00m]'	0		'p-ERBB4(Y1284)[00m]'	0		'p-ERBB4(Y1284)[00m]'	0		'p-CREB(S133)[15m]'	-0.0078616
	'p-ERBB4(Y1284)[00m]'	0		'p-4EBP1(S65)[00m]'	0		'p-4EBP1(S65)[00m]'	0		'p-4EBP1(S65)[00m]'	0		'p-STAT3(Y705)[05m]'	-0.00758246
	'p-4EBP1(S65)[00m]'	0		'p-CRKII(Y221)[05m]'	0		'p-CRKII(Y221)[05m]'	0		'p-CRKII(Y221)[05m]'	0		'p-GAB1(Y627)[15m]'	0.00733962
	'p-CRKII(Y221)[05m]'	0		'p-P90RSK(S380)[15m]'	0		'p-P90RSK(S380)[15m]'	0		'p-P90RSK(S380)[15m]'	0		'p-FOXO1(S319)/…[05m]'	-0.00720829
	'p-P90RSK(S380)[15m]'	0		'p-IRS1(S1101)[00m]'	0		'p-IRS1(S1101)[00m]'	0		'p-IRS1(S1101)[00m]'	0		'p-EGFR(Y1068)[15m]'	0.00717933
	'p-IRS1(S1101)[00m]'	0		'p-JAK1(Y1022/1023)[00m]'	0		'p-JAK1(Y1022/1023)[00m]'	0		'p-JAK1(Y1022/1023)[00m]'	0		'p-IRS1(S1101)[15m]'	0.00708368
	'p-JAK1(Y1022/1023)[00m]'	0		'p-CREB(S133)[05m]'	0		'p-CREB(S133)[05m]'	0		'p-CREB(S133)[05m]'	0		'p-GSK3A(S21)[00m]'	-0.00694188
	'p-CREB(S133)[05m]'	0		'p-P90RSK(S380)[05m]'	0		'p-P90RSK(S380)[05m]'	0		'p-P90RSK(S380)[05m]'	0		'p-FAK(Y576/577)[00m]'	-0.00690234
	'p-P90RSK(S380)[05m]'	0		'p-PLCG1(Y783)[00m]'	0		'p-PLCG1(Y783)[00m]'	0		'p-PLCG1(Y783)[00m]'	0		'p-CRKII(Y221)[00m]'	-0.00684588
	'p-PLCG1(Y783)[00m]'	0		'p-SYK(Y525/526)[15m]'	0		'p-SYK(Y525/526)[15m]'	0		'p-SYK(Y525/526)[15m]'	0		'p-SYK(Y525/526)[15m]'	-0.00649741
	'p-SYK(Y525/526)[15m]'	0		'p-P90RSK(S380)[00m]'	0		'p-P90RSK(S380)[00m]'	0		'p-P90RSK(S380)[00m]'	0		'p-EGFR(Y1068)[00m]'	0.00639557
	'p-P90RSK(S380)[00m]'	0		'p-CDC2(Y15)[05m]'	0		'p-CDC2(Y15)[05m]'	0		'p-CDC2(Y15)[05m]'	0		'p-EGFR(Y1173)[05m]'	-0.00637076
	'p-CDC2(Y15)[05m]'	0		'p-PI3KP85(Y458)P55(Y199)[00m]'	0		'p-PI3KP85(Y458)P55(Y199)[00m]'	0		'p-PI3KP85(Y458)P55(Y199)[00m]'	0		'p-SRC(Y527)[05m]'	0.00608889
	'p-PI3KP85(Y458)P55(Y199)[00m]'	0		'p-CRKII(Y221)[00m]'	0		'p-CRKII(Y221)[00m]'	0		'p-CRKII(Y221)[00m]'	0		'p-PTEN(S380)[15m]'	0.00596857
	'p-CRKII(Y221)[00m]'	0		'p-CRKII(Y221)[15m]'	0		'p-CRKII(Y221)[15m]'	0		'p-CRKII(Y221)[15m]'	0		'p-PDGFRA(Y754)[00m]'	-0.00546304
	'p-CRKII(Y221)[15m]'	0		'p-GAB2(S159)[00m]'	0		'p-GAB2(S159)[00m]'	0		'p-GAB2(S159)[00m]'	0		'p-CRKII(Y221)[05m]'	-0.00542311
	'p-GAB2(S159)[00m]'	0		'p-SRC(Y527)[00m]'	0		'p-SRC(Y527)[00m]'	0		'p-SRC(Y527)[00m]'	0		'p-GAB1(Y627)[05m]'	-0.00525133
	'p-SRC(Y527)[00m]'	0		'p-SHC(Y239/240)[05m]'	0		'p-SHC(Y239/240)[05m]'	0		'p-SHC(Y239/240)[05m]'	0		'p-IGF1RB (Y1135/1136) /…[15m]'	-0.00524901
	'p-SHC(Y239/240)[05m]'	0		'p-IRS1(S1101)[05m]'	0		'p-IRS1(S1101)[05m]'	0		'p-IRS1(S1101)[05m]'	0		'p-SAPK/JNK(T183/Y185)[15m]'	-0.00516084
	'p-IRS1(S1101)[05m]'	0		'p-S6RIBPROT(S240/244)[00m]'	0		'p-S6RIBPROT(S240/244)[00m]'	0		'p-S6RIBPROT(S240/244)[00m]'	0		'p-IRS1(S1101)[05m]'	0.00502696
	'p-PYK2(Y402)[15m]'	0		'p-PYK2(Y402)[15m]'	0		'p-PYK2(Y402)[15m]'	0		'p-PYK2(Y402)[15m]'	0		'p-SRC(Y416)[05m]'	-0.00502018
	'p-ABL(C-)(Y245)[00m]'	0		'p-ABL(C-)(Y245)[00m]'	0		'p-ABL(C-)(Y245)[00m]'	0		'p-ABL(C-)(Y245)[00m]'	0		'p-GAB2(S159)[00m]'	0.00499925
	'p-EGFR(Y845)[00m]'	0		'p-EGFR(Y1173)[00m]'	0		'p-EGFR(Y845)[00m]'	0		'p-EGFR(Y1173)[00m]'	0		'p-PI3KP85(Y458)P55(Y199)[15m]'	-0.00488566
	'p-EGFR(Y1173)[00m]'	0		'p-PDGFRA(Y754)[15m]'	0		'p-EGFR(Y1173)[00m]'	0		'p-PDGFRA(Y754)[15m]'	0		'p-ERK(T202/Y204)[00m]'	-0.00484129
	'p-PDGFRA(Y754)[15m]'	0		'p-CREB(S133)[00m]'	0		'p-PDGFRA(Y754)[15m]'	0		'p-CREB(S133)[00m]'	0		'p-CRKL(Y207)[15m]'	-0.00483569
	'p-ZAP70(Y319)/SYK(Y352)[05m]'	0		'p-PTEN(S380)[15m]'	0		'p-CREB(S133)[00m]'	0		'p-PTEN(S380)[15m]'	0		'p-ZAP70(Y319)/SYK(Y352)[00m]'	0.00483154
	'p-CREB(S133)[00m]'	0		'p-FOXO1(S319)/…[15m]'	0		'p-PTEN(S380)[15m]'	0		'p-FOXO1(S319)/…[15m]'	0		'p-P38MAPK(T180/Y182)[15m]'	0.0048279
	'p-PTEN(S380)[15m]'	0		'p-SHP2(Y542)[00m]'	0		'p-FOXO1(S319)/…[15m]'	0		'p-SHP2(Y542)[00m]'	0		'p-SRC(Y527)[00m]'	-0.00481989
	'p-FOXO1(S319)/…[15m]'	0		'p-PDGFRA(Y754)[05m]'	0		'p-SHP2(Y542)[00m]'	0		'p-PDGFRA(Y754)[05m]'	0		'p-ERBB4(Y1284)[00m]'	-0.00472205
	'p-SHP2(Y542)[00m]'	0		'p-PLCG2(Y759)[00m]'	0		'p-PDGFRA(Y754)[05m]'	0		'p-PLCG2(Y759)[00m]'	0		'p-P70S6K(T421/S424)[15m]'	0.00455056
	'p-MTOR(S2448)[00m]'	0		'p-ERBB2(Y1221/1222)[15m]'	0		'p-PLCG2(Y759)[00m]'	0		'p-ERBB2(Y1221/1222)[15m]'	0		'p-P70S6K(T421/S424)[00m]'	-0.00440836
	'p-PLCG2(Y759)[00m]'	0		'p-FAK(Y576/577)[00m]'	0		'p-ERBB2(Y1221/1222)[15m]'	0		'p-FAK(Y576/577)[00m]'	0		'p-SAPK/JNK(T183/Y185)[05m]'	0.00431526
	'p-ERBB2(Y1221/1222)[15m]'	0		'p-GSK3A(S21)[00m]'	0		'p-FAK(Y576/577)[00m]'	0		'p-GSK3A(S21)[00m]'	0		'p-CDC2(Y15)[15m]'	0.00423504
	'p-FAK(Y576/577)[00m]'	0		'p-4EBP1(T37/46)[15m]'	0		'p-GSK3A(S21)[00m]'	0		'p-4EBP1(T37/46)[15m]'	0		'p-STAT5(Y694)[15m]'	0.00412037
	'p-GSK3A(S21)[00m]'	0		'p-PDGFRA(Y754)[00m]'	0		'p-4EBP1(T37/46)[15m]'	0		'p-PDGFRA(Y754)[00m]'	0		'p-CRKII(Y221)[15m]'	0.00402016
	'p-PDGFRB(Y1009)[15m]'	0		'p-P38MAPK(T180/Y182)[15m]'	0		'p-PDGFRA(Y754)[00m]'	0		'p-P38MAPK(T180/Y182)[15m]'	0		'p-P90RSK(S380)[00m]'	-0.00393788
	'p-PDGFRA(Y754)[00m]'	0		'p-PKCPAN/G(T514)[00m]'	0		'p-P38MAPK(T180/Y182)[15m]'	0		'p-PKCPAN/G(T514)[00m]'	0		'p-RAF(C-)(S259)[00m]'	0.00388817
	'p-PKCPAN/G(T514)[00m]'	0		'p-ZAP70(Y319)/SYK(Y352)[00m]'	0		'p-PKCPAN/G(T514)[00m]'	0		'p-ZAP70(Y319)/SYK(Y352)[00m]'	0		'p-SRC(Y416)[00m]'	-0.00380176
	'p-ZAP70(Y319)/SYK(Y352)[00m]'	0		'p-MET(Y1234/1235)[00m]'	0		'p-MET(Y1234/1235)[00m]'	0		'p-MET(Y1234/1235)[00m]'	0		'p-4EBP1(S65)[15m]'	0.00379127
	'p-MET(Y1234/1235)[00m]'	0		'p-SAPK/JNK(T183/Y185)[15m]'	0		'p-SAPK/JNK(T183/Y185)[15m]'	0		'p-SAPK/JNK(T183/Y185)[15m]'	0		'p-PI3KP85(Y458)P55(Y199)[05m]'	-0.00376962
	'p-SAPK/JNK(T183/Y185)[15m]'	0		'p-STAT3(S727)[00m]'	0		'p-STAT3(S727)[00m]'	0		'p-STAT3(S727)[00m]'	0		'p-PYK2(Y402)[15m]'	0.00368995
	'p-STAT3(S727)[00m]'	0		'p-MEK(1/2)(S217/221)[05m]'	0		'p-MEK(1/2)(S217/221)[05m]'	0		'p-MEK(1/2)(S217/221)[05m]'	0		'p-P90RSK(S380)[05m]'	0.00348487
	'p-MEK(1/2)(S217/221)[05m]'	0		'p-RAF(C-)(S338)[00m]'	0		'p-P70S6K(T421/S424)[15m]'	0		'p-RAF(C-)(S338)[00m]'	0		'p-IGF1RB (Y1135/1136) /…[00m]'	0.00346276
	'p-RAF(C-)(S338)[00m]'	0		'p-P70S6K(T421/S424)[15m]'	0		'p-STAT3(S727)[15m]'	0		'p-P70S6K(T421/S424)[15m]'	0		'p-MET(Y1349)[05m]'	0.00344725
	'p-P70S6K(T421/S424)[15m]'	0		'p-STAT3(S727)[15m]'	0		'p-PTEN(S380)[05m]'	0		'p-STAT3(S727)[15m]'	0		'p-STAT3(S727)[15m]'	-0.00343013
	'p-STAT3(S727)[15m]'	0		'p-PTEN(S380)[05m]'	0		'p-EGFR(Y1068)[00m]'	0		'p-PTEN(S380)[05m]'	0		'p-SHP2(Y542)[00m]'	-0.00333205
	'p-PTEN(S380)[05m]'	0		'p-EGFR(Y1068)[00m]'	0		'p-PKCD(T505)[00m]'	0		'p-EGFR(Y1068)[00m]'	0		'p-FOXO1(S319)/…[15m]'	0.00327803
	'p-PDK1(S241)[00m]'	0		'p-PKCD(T505)[00m]'	0		'p-EGFR(Y1086)[00m]'	0		'p-PKCD(T505)[00m]'	0		'p-IGF1RB (Y1135/1136) /…[05m]'	-0.00327515
	'p-EGFR(Y1068)[00m]'	0		'p-EGFR(Y1086)[00m]'	0		'p-IRS1(S1101)[15m]'	0		'p-EGFR(Y1086)[00m]'	0		'p-S6RIBPROT(S240/244)[05m]'	-0.00314837
	'p-PKCD(T505)[00m]'	0		'p-IRS1(S1101)[15m]'	0		'p-PYK2(Y402)[00m]'	0		'p-IRS1(S1101)[15m]'	0		'p-STAT1(Y701)[00m]'	-0.00304912
	'p-EGFR(Y1086)[00m]'	0		'p-PYK2(Y402)[00m]'	0		'p-STAT3(Y705)[05m]'	0		'p-PYK2(Y402)[00m]'	0		'p-SAPK/JNK(T183/Y185)[00m]'	-0.00301145
	'p-IRS1(S1101)[15m]'	0		'p-STAT3(Y705)[05m]'	0		'p-4EBP1(T37/46)[05m]'	0		'p-STAT3(Y705)[05m]'	0		'p-PDGFRA(Y754)[05m]'	-0.00291709
	'p-PYK2(Y402)[00m]'	0		'p-4EBP1(T37/46)[05m]'	0		'p-GAB1(Y627)[15m]'	0		'p-4EBP1(T37/46)[05m]'	0		'p-STAT3(S727)[00m]'	0.00285609
	'p-4EBP1(T37/46)[05m]'	0		'p-GAB1(Y627)[15m]'	0		'p-CDC2(Y15)[00m]'	0		'p-GAB1(Y627)[15m]'	0		'p-FOXO1(S319)/…[00m]'	-0.00280218
	'p-GAB1(Y627)[15m]'	0		'p-CDC2(Y15)[00m]'	0		'p-SHC(Y239/240)[00m]'	0		'p-CDC2(Y15)[00m]'	0		'p-FGFR1(Y653/654)[00m]'	-0.0026631
	'p-CDC2(Y15)[00m]'	0		'p-SHC(Y239/240)[00m]'	0		'p-ERBB2(Y1221/1222)[00m]'	0		'p-SHC(Y239/240)[00m]'	0		'p-EGFR(Y1068)[05m]'	-0.002649
	'p-SHC(Y239/240)[00m]'	0		'p-ERBB2(Y1221/1222)[00m]'	0		'p-FOXO3A(S253)[00m]'	0		'p-ERBB2(Y1221/1222)[00m]'	0		'p-KIT(C-)(Y719)[00m]'	-0.00243305
	'p-ERBB2(Y1221/1222)[00m]'	0		'p-FOXO3A(S253)[00m]'	0		'p-SRC(Y527)[15m]'	0		'p-FOXO3A(S253)[00m]'	0		'p-ABL(C-)(Y245)[00m]'	0.00212828
	'p-FOXO3A(S253)[00m]'	0		'p-SRC(Y527)[15m]'	0		'p-ABL(C-)(Y245)[15m]'	0		'p-SRC(Y527)[15m]'	0		'p-PTEN(S380)[05m]'	0.00211044
	'p-SRC(Y527)[15m]'	0		'p-ABL(C-)(Y245)[15m]'	0		'p-GAB1(Y627)[05m]'	0		'p-ABL(C-)(Y245)[15m]'	0		'p-FOXO3A(S253)[00m]'	0.00210943
	'p-ABL(C-)(Y245)[15m]'	0		'p-GAB1(Y627)[05m]'	0		'p-AKT(S473)[00m]'	0		'p-GAB1(Y627)[05m]'	0		'p-CREB(S133)[00m]'	-0.00209475
	'p-GAB1(Y627)[05m]'	0		'p-AKT(S473)[00m]'	0		'p-CRKL(Y207)[05m]'	0		'p-AKT(S473)[00m]'	0		'p-PDFGRA(Y849)/…[00m]'	-0.00182746
	'p-CRKL(Y207)[05m]'	0		'p-CRKL(Y207)[05m]'	0		'p-4EBP1(S65)[15m]'	0		'p-CRKL(Y207)[05m]'	0		'p-PDGFRA(Y754)[15m]'	0.00180079
	'p-4EBP1(S65)[15m]'	0		'p-4EBP1(S65)[15m]'	0		'p-RAF(C-)(S259)[00m]'	0		'p-4EBP1(S65)[15m]'	0		'p-SRC(Y416)[15m]'	0.00174866
	'p-RAF(C-)(S259)[00m]'	0		'p-RAF(C-)(S259)[00m]'	0		'p-PDFGRA(Y849)/…[00m]'	0		'p-RAF(C-)(S259)[00m]'	0		'p-SHC(Y239/240)[00m]'	0.00170868
	'p-PDFGRA(Y849)/…[00m]'	0		'p-PDFGRA(Y849)/…[00m]'	0		'p-JAK1(Y1022/1023)[05m]'	0		'p-PDFGRA(Y849)/…[00m]'	0		'p-KIT(C-)(Y719)[15m]'	-0.00163453
	'p-JAK1(Y1022/1023)[05m]'	0		'p-JAK1(Y1022/1023)[05m]'	0		'p-SHC(Y239/240)[15m]'	0		'p-JAK1(Y1022/1023)[05m]'	0		'p-STAT5(Y694)[00m]'	0.00146392
	'p-MET(Y1349)[05m]'	0		'p-SHC(Y239/240)[15m]'	0		'p-MET(Y1349)[05m]'	0		'p-SHC(Y239/240)[15m]'	0		'p-EGFR(Y1086)[00m]'	0.00143378
	'p-SRC(Y527)[05m]'	0		'p-MET(Y1349)[05m]'	0		'p-SRC(Y527)[05m]'	0		'p-MET(Y1349)[05m]'	0		'p-STAT6(Y641)[00m]'	-0.00133678
	'p-SAPK/JNK(T183/Y185)[05m]'	0		'p-SRC(Y527)[05m]'	0		'p-SAPK/JNK(T183/Y185)[05m]'	0		'p-SRC(Y527)[05m]'	0		'p-CDC2(Y15)[00m]'	-0.00119486
	'p-ABL(C-)(Y245)[05m]'	0		'p-SAPK/JNK(T183/Y185)[05m]'	0		'p-STAT6(Y641)[00m]'	0		'p-SAPK/JNK(T183/Y185)[05m]'	0		'p-PLCG2(Y759)[00m]'	-0.00110201
	'p-STAT6(Y641)[00m]'	0		'p-STAT6(Y641)[00m]'	0		'p-MTOR(S2448)[05m]'	0		'p-STAT6(Y641)[00m]'	0		'p-PTEN(S380)[00m]'	-0.00067751
	'p-MTOR(S2448)[05m]'	0		'p-MTOR(S2448)[05m]'	0		'p-PI3KP85(Y458)P55(Y199)[15m]'	0		'p-MTOR(S2448)[05m]'	0		'p-SHP2(Y542)[15m]'	-0.000661357
	'p-PI3KP85(Y458)P55(Y199)[15m]'	0		'p-PI3KP85(Y458)P55(Y199)[15m]'	0		'p-JAK1(Y1022/1023)[15m]'	0		'p-PI3KP85(Y458)P55(Y199)[15m]'	0		'p-EGFR(Y1173)[15m]'	-0.000660028
	'p-JAK1(Y1022/1023)[15m]'	0		'p-JAK1(Y1022/1023)[15m]'	0		'p-CRKL(Y207)[15m]'	0		'p-JAK1(Y1022/1023)[15m]'	0		'p-PKCD(T505)[05m]'	0.000582495
	'p-CRKL(Y207)[15m]'	0		'p-CRKL(Y207)[15m]'	0		'p-STAT5(Y694)[15m]'	0		'p-CRKL(Y207)[15m]'	0		'p-MET(Y1234/1235)[00m]'	0.000538805
	'p-CDC2(Y15)[15m]'	0		'p-STAT5(Y694)[15m]'	0		'p-CDC2(Y15)[15m]'	0		'p-STAT5(Y694)[15m]'	0		'p-PI3KP85(Y458)P55(Y199)[00m]'	0.000480216
	'p-CREB(S133)[15m]'	0		'p-CREB(S133)[15m]'	0		'p-CREB(S133)[15m]'	0		'p-CREB(S133)[15m]'	0		'p-MTOR(S2448)[00m]'	-0.000409497
	'p-PI3KP85(Y458)P55(Y199)[05m]'	0		'p-PI3KP85(Y458)P55(Y199)[05m]'	0		'p-PI3KP85(Y458)P55(Y199)[05m]'	0		'p-PI3KP85(Y458)P55(Y199)[05m]'	0		'p-PKCD(T505)[00m]'	-0.000216425
	'p-MTOR(S2448)[15m]'	0		'p-MTOR(S2448)[15m]'	0		'p-MTOR(S2448)[15m]'	0		'p-MTOR(S2448)[15m]'	0		'p-SYK(Y525/526)[00m]'	5.53529e-05
