# Supplementary material for: The DIONESUS algorithm provides scalable and accurate reconstruction of dynamic phosphoproteomic networks to reveal new drug targets
Source: Royal Society of Chemistry journal article supplement (doi:10.1039/c5ib00065c), 2015-01-01
Supplement: c5ib00065c11.xlsx [file c5ib00065c11.xlsx]

## Sheet: Sheet1
Supplementary Table 6: VIP scores by number of PCs included for PLS-VIP regression							*Variables selected for Final Model
	1 PC			2 PCs			3 PCs			4 PCs
	Explanatory Variable	VIP		Explanatory Variable	VIP		Explanatory Variable	VIP		Explanatory Variable	VIP
	Media (Constant)	2.38742		Media (Constant)	5.31127		Media (Constant)	5.30035		Media (Constant)	5.22611
	p-EGFR(Y1086)[05m]	3.49286		p-AKT(S473)[15m]	2.74862		p-AKT(S473)[15m]	2.61776		p-AKT(S473)[15m]	2.57849
	p-EGFR(Y1086)[15m]	3.32858		p-S6RIBPROT(S240/244)[15m]	2.53308		p-S6RIBPROT(S240/244)[15m]	2.43104		p-S6RIBPROT(S240/244)[15m]	2.39753
	p-EGFR(Y1068)[15m]	2.44207		p-EGFR(Y1086)[05m]	2.52121		p-EGFR(Y1086)[05m]	2.41162		p-EGFR(Y1086)[05m]	2.38209
	p-STAT1(Y701)[05m]	2.43822		p-EGFR(Y1086)[15m]	2.39369		p-EGFR(Y1086)[15m]	2.28489		p-EGFR(Y1086)[15m]	2.24997
	p-PLCG2(Y759)[05m]	2.32879		p-CDK2(T160)[15m]	2.29245		p-CDK2(T160)[15m]	2.20423		p-CDK2(T160)[15m]	2.19065
	p-PLCG2(Y759)[15m]	2.28282		p-AKT(S473)[05m]	2.27936		p-AKT(S473)[05m]	2.19501		p-AKT(S473)[05m]	2.18451
	p-MET(Y1234/1235)[05m]	2.19311		p-STAT1(Y701)[05m]	2.12977		p-STAT1(Y701)[05m]	2.10624		p-STAT1(Y701)[05m]	2.15373
	p-EGFR(Y1068)[05m]	2.16961		p-CDK2(T160)[05m]	2.10025		p-CDK2(T160)[05m]	2.01209		p-CDK2(T160)[05m]	1.99496
	p-STAT1(Y701)[15m]	2.04122		p-PDK1(S241)[15m]	1.93195		p-PDK1(S241)[15m]	1.95851		p-PDK1(S241)[15m]	1.94504
	p-EGFR(Y845)[05m]	1.95741		p-PKCPAN/G(T514)[05m]	1.87189		p-EGFR(Y1068)[15m]	1.8436		p-RAF(C-)(S338)[15m]	1.86267
	p-EGFR(Y1173)[05m]	1.85264		p-RAF(C-)(S338)[15m]	1.86498		p-RAF(C-)(S338)[15m]	1.8126		p-EGFR(Y1068)[15m]	1.82621
	p-PDFGRA(Y849)/…[15m]	1.79141		p-PKCPAN/G(T514)[15m]	1.86275		p-PLCG2(Y759)[05m]	1.78871		p-PLCG2(Y759)[05m]	1.76741
	p-PDFGRA(Y849)/…[05m]	1.76259		p-PLCG2(Y759)[05m]	1.85564		p-PLCG2(Y759)[15m]	1.78811		p-PLCG2(Y759)[15m]	1.76173
	p-AKT(S473)[15m]	1.73065		p-PLCG2(Y759)[15m]	1.84345		p-PKCPAN/G(T514)[15m]	1.78789		p-PKCPAN/G(T514)[15m]	1.76068
	p-GAB2(S159)[15m]	1.684		p-P38MAPK(T180/Y182)[00m]	1.82914		p-PKCPAN/G(T514)[05m]	1.78421		p-PKCPAN/G(T514)[05m]	1.75739
	p-PDK1(S241)[15m]	1.68059		p-EGFR(Y1068)[15m]	1.79111		p-ERK(T202/Y204)[05m]	1.75885		p-RAF(C-)(S338)[05m]	1.74367
	p-AKT(S473)[05m]	1.67035		p-RAF(C-)(S338)[05m]	1.7768		p-P38MAPK(T180/Y182)[00m]	1.75607		p-ERK(T202/Y204)[05m]	1.73198
	p-MET(Y1234/1235)[15m]	1.6136		p-EGFR(Y845)[05m]	1.71574		p-RAF(C-)(S338)[05m]	1.70981		p-P38MAPK(T180/Y182)[00m]	1.73173
	p-GAB2(S159)[05m]	1.61213		p-MEK(1/2)(S217/221)[00m]	1.70741		p-EGFR(Y845)[05m]	1.6796		p-EGFR(Y845)[05m]	1.65953
	p-FAK(Y576/577)[15m]	1.54597		p-GAB2(S159)[15m]	1.67775		p-STAT1(Y701)[15m]	1.62888		p-STAT1(Y701)[15m]	1.62692
	p-FGFR1(Y653/654)[05m]	1.52433		p-MET(Y1234/1235)[05m]	1.66915		p-MEK(1/2)(S217/221)[00m]	1.6267		p-MEK(1/2)(S217/221)[00m]	1.60314
	p-EGFR(Y845)[15m]	1.50641		p-STAT1(Y701)[15m]	1.6558		p-GAB2(S159)[15m]	1.6016		p-GAB2(S159)[15m]	1.58357
	p-PLCG1(Y783)[05m]	1.49138		p-GAB2(S159)[05m]	1.62681		p-MET(Y1234/1235)[05m]	1.59817		p-MET(Y1234/1235)[05m]	1.57381
	p-CDK2(T160)[15m]	1.488		p-PDK1(S241)[05m]	1.61648		p-PDK1(S241)[05m]	1.57087		p-PDK1(S241)[05m]	1.55742
	p-STAT6(Y641)[15m]	1.48656		p-EGFR(Y1068)[05m]	1.58239		p-GAB2(S159)[05m]	1.55183		p-GAB2(S159)[05m]	1.53162
	p-EGFR(Y1173)[15m]	1.48648		p-ERK(T202/Y204)[05m]	1.57719		p-EGFR(Y1068)[05m]	1.55076		p-EGFR(Y1068)[05m]	1.52757
	p-S6RIBPROT(S240/244)[15m]	1.46886		p-PDFGRA(Y849)/…[15m]	1.458		p-PDFGRA(Y849)/…[15m]	1.40691		p-PDFGRA(Y849)/…[15m]	1.41171
	p-PYK2(Y402)[05m]	1.46036		p-EGFR(Y1173)[05m]	1.36254		p-FGFR1(Y653/654)[05m]	1.31804		p-FGFR1(Y653/654)[05m]	1.3204
	p-PLCG1(Y783)[15m]	1.43488		p-FGFR1(Y653/654)[05m]	1.31394		p-EGFR(Y1173)[05m]	1.31209		p-EGFR(Y1173)[05m]	1.29284
	p-SRC(Y416)[05m]	1.40445		p-PDFGRA(Y849)/…[05m]	1.30457		p-PDFGRA(Y849)/…[05m]	1.2819		p-PDFGRA(Y849)/…[05m]	1.28074
	p-SHP2(Y542)[05m]	1.4011		p-FAK(Y576/577)[15m]	1.29767		p-PLCG1(Y783)[15m]	1.27113		p-PLCG1(Y783)[15m]	1.26831
	p-FGFR1(Y653/654)[15m]	1.32963		p-PLCG1(Y783)[05m]	1.29367		p-PLCG1(Y783)[05m]	1.26874		p-PLCG1(Y783)[05m]	1.26569
	p-PKCPAN/G(T514)[15m]	1.31365		p-EGFR(Y845)[15m]	1.28017		p-FAK(Y576/577)[15m]	1.23667		p-FAK(Y576/577)[15m]	1.25967
	p-CDK2(T160)[05m]	1.30562		p-PLCG1(Y783)[15m]	1.26575		p-EGFR(Y845)[15m]	1.23557		p-IGF1RB (Y1135/1136) /…[05m]	1.23253
	p-PKCPAN/G(T514)[05m]	1.29053		p-GSK3A(S21)[05m]	1.23665		p-IGF1RB (Y1135/1136) /…[05m]	1.20069		p-EGFR(Y845)[15m]	1.22346
	p-STAT6(Y641)[05m]	1.26929		p-FOXO1(S319)/…[00m]	1.2152		p-GSK3A(S21)[05m]	1.19203		p-GSK3A(S21)[05m]	1.18784
	p-FAK(Y576/577)[05m]	1.24942		p-MET(Y1234/1235)[15m]	1.16465		p-FOXO1(S319)/…[00m]	1.17025		p-RAF(C-)(S259)[15m]	1.15752
	p-SYK(Y525/526)[05m]	1.24415		p-IGF1RB (Y1135/1136) /…[05m]	1.15326		p-STAT6(Y641)[15m]	1.14513		p-FOXO1(S319)/…[00m]	1.15236
	p-RAF(C-)(S338)[15m]	1.16767		p-ERK(T202/Y204)[00m]	1.13703		p-RAF(C-)(S259)[15m]	1.12656		p-STAT6(Y641)[15m]	1.13794
	p-4EBP1(S65)[05m]	1.15729		p-PYK2(Y402)[05m]	1.13456		p-P38MAPK(T180/Y182)[05m]	1.11514		p-CDK2(T160)[00m]	1.13515
	p-GSK3A(S21)[05m]	1.15416		p-STAT6(Y641)[15m]	1.1244		p-MET(Y1234/1235)[15m]	1.11023		p-PDGFRB(Y1009)[05m]	1.11767
	p-PDK1(S241)[05m]	1.14612		p-KIT(C-)(Y719)[05m]	1.12189		p-STAT6(Y641)[05m]	1.10794		p-STAT6(Y641)[05m]	1.10009
	p-P38MAPK(T180/Y182)[00m]	1.13819		p-STAT6(Y641)[05m]	1.11556		p-PDGFRB(Y1009)[05m]	1.09098		p-P38MAPK(T180/Y182)[05m]	1.09988
	p-PDGFRB(Y1009)[05m]	1.13598		p-MEK(1/2)(S217/221)[15m]	1.10537		p-ERK(T202/Y204)[00m]	1.08501		p-MET(Y1234/1235)[15m]	1.09409
	p-SRC(Y416)[15m]	1.13419		p-SRC(Y416)[05m]	1.09196		p-ZAP70(Y319)/SYK(Y352)[15m]	1.08343		p-PYK2(Y402)[05m]	1.08357
	p-ZAP70(Y319)/SYK(Y352)[15m]	1.09846		p-PKCD(T505)[15m]	1.09155		p-PYK2(Y402)[05m]	1.08042		p-IGF1RB (Y1135/1136) /…[15m]	1.08291
	p-ERBB2(Y1221/1222)[05m]	1.08798		p-EGFR(Y1173)[15m]	1.06864		p-IGF1RB (Y1135/1136) /…[15m]	1.07887		p-ZAP70(Y319)/SYK(Y352)[15m]	1.08269
	p-IGF1RB (Y1135/1136) /…[00m]	1.08696		p-FGFR1(Y653/654)[15m]	1.06266		p-KIT(C-)(Y719)[05m]	1.07276		p-ERK(T202/Y204)[00m]	1.0784
	p-RAF(C-)(S338)[05m]	1.04506		p-S6RIBPROT(S240/244)[05m]	1.0624		p-SRC(Y416)[05m]	1.06974		p-FGFR1(Y653/654)[15m]	1.07076
	p-KIT(C-)(Y719)[05m]	1.03596		p-GAB1(Y627)[00m]	1.0543		p-FGFR1(Y653/654)[15m]	1.06445		p-SRC(Y416)[05m]	1.06382
	p-SYK(Y525/526)[15m]	0.948495		p-P38MAPK(T180/Y182)[05m]	1.04685		p-CDK2(T160)[00m]	1.05866		p-MET(Y1349)[15m]	1.06157
	p-4EBP1(S65)[00m]	0.945602		p-FOXO3A(S253)[05m]	1.04176		p-S6RIBPROT(S240/244)[05m]	1.05849		p-KIT(C-)(Y719)[05m]	1.06075
	p-GAB2(S159)[00m]	0.920987		p-SAPK/JNK(T183/Y185)[00m]	1.0314		p-MEK(1/2)(S217/221)[15m]	1.05583		p-PKCD(T505)[15m]	1.05576
	p-STAT3(Y705)[15m]	0.915269		p-RAF(C-)(S259)[15m]	1.01639		p-EGFR(Y1173)[15m]	1.04729		p-ZAP70(Y319)/SYK(Y352)[05m]	1.04614
	p-KIT(C-)(Y719)[15m]	0.879753		p-SHP2(Y542)[05m]	1.00882		p-PKCD(T505)[15m]	1.04165		p-MEK(1/2)(S217/221)[15m]	1.04256
	p-RAF(C-)(S259)[05m]	0.874097		p-CDK2(T160)[00m]	1.00584		p-ZAP70(Y319)/SYK(Y352)[05m]	1.02799		p-S6RIBPROT(S240/244)[05m]	1.04235
	p-SHP2(Y542)[15m]	0.868287		p-IGF1RB (Y1135/1136) /…[15m]	1.00413		p-GAB1(Y627)[00m]	1.02112		p-EGFR(Y1173)[15m]	1.03246
	p-PYK2(Y402)[15m]	0.821631		p-PDGFRB(Y1009)[05m]	1.0016		p-MET(Y1349)[15m]	1.01654		p-GAB1(Y627)[00m]	1.02144
	p-P70S6K(T421/S424)[05m]	0.814179		p-KIT(C-)(Y719)[00m]	0.988921		p-FOXO3A(S253)[05m]	1.00628		p-FOXO3A(S253)[05m]	0.992083
	p-IGF1RB (Y1135/1136) /…[05m]	0.803919		p-FOXO3A(S253)[15m]	0.980415		p-FOXO3A(S253)[15m]	0.996123		p-FOXO3A(S253)[15m]	0.981122
	p-P90RSK(S380)[05m]	0.800373		p-FAK(Y576/577)[05m]	0.946294		p-SAPK/JNK(T183/Y185)[00m]	0.986494		p-SAPK/JNK(T183/Y185)[00m]	0.973227
	p-IRS1(S1101)[05m]	0.798049		p-IGF1RB (Y1135/1136) /…[00m]	0.933145		p-SHP2(Y542)[05m]	0.967414		p-SHP2(Y542)[05m]	0.958614
	p-EGFR(Y1173)[00m]	0.792378		p-KIT(C-)(Y719)[15m]	0.932124		p-ERBB2(Y1221/1222)[05m]	0.945132		p-RAF(C-)(S259)[05m]	0.951757
	p-RAF(C-)(S259)[15m]	0.790047		p-ERBB4(Y1284)[15m]	0.925784		p-KIT(C-)(Y719)[00m]	0.94369		p-ERBB2(Y1221/1222)[05m]	0.946327
	p-GSK3A(S21)[15m]	0.784627		p-MET(Y1349)[00m]	0.925345		p-ERBB4(Y1284)[05m]	0.937044		p-PDGFRB(Y1009)[00m]	0.9412
	p-PTEN(S380)[15m]	0.782499		p-RAF(C-)(S259)[05m]	0.924823		p-IGF1RB (Y1135/1136) /…[00m]	0.935413		p-IGF1RB (Y1135/1136) /…[00m]	0.939232
	p-PKCD(T505)[15m]	0.760135		p-4EBP1(S65)[05m]	0.918744		p-KIT(C-)(Y719)[15m]	0.921745		p-KIT(C-)(Y719)[00m]	0.938056
	p-ERBB2(Y1221/1222)[15m]	0.755656		p-ERBB4(Y1284)[05m]	0.916431		p-FAK(Y576/577)[05m]	0.912426		p-ERBB4(Y1284)[05m]	0.926709
	p-P90RSK(S380)[15m]	0.748213		p-SYK(Y525/526)[05m]	0.895		p-RAF(C-)(S259)[05m]	0.909106		p-FAK(Y576/577)[05m]	0.919014
	p-S6RIBPROT(S240/244)[05m]	0.738082		p-STAT3(Y705)[15m]	0.876628		p-PDGFRB(Y1009)[00m]	0.907605		p-KIT(C-)(Y719)[15m]	0.914875
	p-PDGFRB(Y1009)[15m]	0.709164		p-SHP2(Y542)[15m]	0.87209		p-MET(Y1349)[00m]	0.897496		p-MET(Y1349)[00m]	0.908143
	p-4EBP1(T37/46)[15m]	0.705475		p-PTEN(S380)[00m]	0.867658		p-ERBB4(Y1284)[15m]	0.895061		p-ERK(T202/Y204)[15m]	0.901065
	p-FOXO3A(S253)[05m]	0.7016		p-PKCD(T505)[05m]	0.865245		p-4EBP1(S65)[05m]	0.883096		p-ERBB4(Y1284)[15m]	0.897731
	p-P38MAPK(T180/Y182)[15m]	0.693344		p-ERBB2(Y1221/1222)[05m]	0.860992		p-SRC(Y416)[15m]	0.865955		p-SYK(Y525/526)[05m]	0.874453
	p-PDGFRA(Y754)[00m]	0.690592		p-PDGFRB(Y1009)[00m]	0.849928		p-SYK(Y525/526)[05m]	0.860359		p-4EBP1(S65)[05m]	0.870149
	p-IGF1RB (Y1135/1136) /…[15m]	0.671755		p-SRC(Y416)[15m]	0.838682		p-4EBP1(S65)[00m]	0.854171		p-4EBP1(T37/46)[00m]	0.858887
	p-ERBB4(Y1284)[05m]	0.669154		p-ZAP70(Y319)/SYK(Y352)[15m]	0.834001		p-4EBP1(T37/46)[00m]	0.851999		p-4EBP1(S65)[00m]	0.857639
	p-ZAP70(Y319)/SYK(Y352)[00m]	0.666618		p-FOXO1(S319)/…[05m]	0.833878		p-STAT3(Y705)[15m]	0.850707		p-SRC(Y416)[15m]	0.855558
	p-CREB(S133)[05m]	0.656738		p-STAT1(Y701)[00m]	0.830599		p-ERK(T202/Y204)[15m]	0.848255		p-STAT3(Y705)[15m]	0.840291
	p-ERK(T202/Y204)[15m]	0.654895		p-4EBP1(T37/46)[00m]	0.817893		p-PKCD(T505)[05m]	0.846262		p-PKCD(T505)[05m]	0.833447
	p-MEK(1/2)(S217/221)[15m]	0.647326		p-MET(Y1349)[15m]	0.81111		p-SHP2(Y542)[15m]	0.837599		p-SHP2(Y542)[15m]	0.826969
	p-4EBP1(T37/46)[00m]	0.645607		p-GSK3A(S21)[15m]	0.807434		p-PTEN(S380)[00m]	0.827481		p-CRKL(Y207)[00m]	0.818928
	p-ZAP70(Y319)/SYK(Y352)[05m]	0.645004		p-STAT5(Y694)[05m]	0.800714		p-CRKL(Y207)[00m]	0.802906		p-PTEN(S380)[00m]	0.814865
	p-MET(Y1234/1235)[00m]	0.640458		p-SYK(Y525/526)[00m]	0.77933		p-FOXO1(S319)/…[05m]	0.800108		p-JAK1(Y1022/1023)[05m]	0.809715
	p-P70S6K(T421/S424)[15m]	0.64001		p-P70S6K(T421/S424)[05m]	0.778386		p-STAT1(Y701)[00m]	0.790958		p-STAT3(Y705)[00m]	0.806143
	p-STAT3(S727)[05m]	0.639718		p-P70S6K(T421/S424)[00m]	0.768404		p-JAK1(Y1022/1023)[00m]	0.787463		p-FOXO1(S319)/…[05m]	0.805091
	p-ERBB4(Y1284)[15m]	0.626433		p-CRKL(Y207)[00m]	0.761439		p-IRS1(S1101)[00m]	0.781074		p-JAK1(Y1022/1023)[00m]	0.790046
	p-STAT5(Y694)[05m]	0.620908		p-SRC(Y416)[00m]	0.759929		p-STAT3(Y705)[00m]	0.779624		p-STAT1(Y701)[00m]	0.779555
	p-EGFR(Y1068)[00m]	0.618552		p-STAT3(Y705)[00m]	0.759373		p-P70S6K(T421/S424)[05m]	0.777338		p-S6RIBPROT(S240/244)[00m]	0.775616
	p-EGFR(Y1086)[00m]	0.605592		p-STAT5(Y694)[00m]	0.759018		p-CRKII(Y221)[05m]	0.771622		p-P70S6K(T421/S424)[05m]	0.774983
	p-FOXO3A(S253)[15m]	0.594177		p-FGFR1(Y653/654)[00m]	0.758546		p-GSK3A(S21)[15m]	0.771106		p-IRS1(S1101)[00m]	0.769607
	p-STAT3(S727)[00m]	0.566637		p-ERBB4(Y1284)[00m]	0.754442		p-STAT5(Y694)[05m]	0.764701		p-GSK3A(S21)[15m]	0.767743
	p-CDC2(Y15)[05m]	0.553582		p-4EBP1(S65)[00m]	0.75406		p-SYK(Y525/526)[00m]	0.758818		p-STAT5(Y694)[05m]	0.766505
	p-IRS1(S1101)[15m]	0.542726		p-CRKII(Y221)[05m]	0.752461		p-JAK1(Y1022/1023)[05m]	0.748014		p-CRKII(Y221)[05m]	0.760559
	p-STAT3(Y705)[05m]	0.523056		p-P90RSK(S380)[15m]	0.749173		p-PLCG1(Y783)[00m]	0.744895		p-PLCG1(Y783)[00m]	0.754292
	p-AKT(S473)[00m]	0.51528		p-IRS1(S1101)[00m]	0.737193		p-STAT5(Y694)[00m]	0.732024		p-SYK(Y525/526)[00m]	0.747303
	p-FOXO3A(S253)[00m]	0.510431		p-JAK1(Y1022/1023)[00m]	0.735693		p-P70S6K(T421/S424)[00m]	0.73177		p-EGFR(Y845)[00m]	0.746964
	p-IRS1(S1101)[00m]	0.509424		p-CREB(S133)[05m]	0.733223		p-SRC(Y416)[00m]	0.724577		p-ERBB2(Y1221/1222)[15m]	0.73757
	p-PDK1(S241)[00m]	0.508817		p-P90RSK(S380)[05m]	0.711819		p-FGFR1(Y653/654)[00m]	0.722536		p-RAF(C-)(S338)[00m]	0.731037
	p-SRC(Y527)[15m]	0.506846		p-PLCG1(Y783)[00m]	0.708483		p-ERBB4(Y1284)[00m]	0.720622		p-PDGFRB(Y1009)[15m]	0.72508
	p-4EBP1(S65)[15m]	0.492388		p-SYK(Y525/526)[15m]	0.704893		p-P90RSK(S380)[15m]	0.713426		p-CDC2(Y15)[05m]	0.7245
	p-CDK2(T160)[00m]	0.484563		p-P90RSK(S380)[00m]	0.703571		p-CDC2(Y15)[05m]	0.709325		p-P70S6K(T421/S424)[00m]	0.721517
	p-4EBP1(T37/46)[05m]	0.484556		p-CDC2(Y15)[05m]	0.695014		p-CREB(S133)[05m]	0.698582		p-STAT5(Y694)[00m]	0.720849
	p-STAT3(Y705)[00m]	0.483785		p-PI3KP85(Y458)P55(Y199)[00m]	0.687062		p-P90RSK(S380)[05m]	0.696877		p-FGFR1(Y653/654)[00m]	0.7179
	p-PKCD(T505)[05m]	0.482393		p-CRKII(Y221)[00m]	0.681492		p-4EBP1(T37/46)[15m]	0.69098		p-SRC(Y416)[00m]	0.713607
	p-CREB(S133)[00m]	0.480401		p-CRKII(Y221)[15m]	0.66707		p-SHC(Y239/240)[05m]	0.685154		p-ERBB4(Y1284)[00m]	0.710899
	p-SHC(Y239/240)[05m]	0.46982		p-GAB2(S159)[00m]	0.666232		p-EGFR(Y845)[00m]	0.683291		p-P90RSK(S380)[15m]	0.708136
	p-CDC2(Y15)[00m]	0.462716		p-SRC(Y527)[00m]	0.662326		p-PDGFRB(Y1009)[15m]	0.678854		p-CRKII(Y221)[15m]	0.706506
	p-GAB1(Y627)[05m]	0.446521		p-SHC(Y239/240)[05m]	0.659948		p-P90RSK(S380)[00m]	0.672911		p-P90RSK(S380)[05m]	0.697136
	p-JAK1(Y1022/1023)[05m]	0.437153		p-IRS1(S1101)[05m]	0.642679		p-SYK(Y525/526)[15m]	0.671263		p-CREB(S133)[05m]	0.694618
	p-PKCD(T505)[00m]	0.432745		p-S6RIBPROT(S240/244)[00m]	0.639946		p-PI3KP85(Y458)P55(Y199)[00m]	0.665329		p-4EBP1(T37/46)[15m]	0.682167
	p-PTEN(S380)[05m]	0.417009		p-PYK2(Y402)[15m]	0.611708		p-CRKII(Y221)[00m]	0.64939		p-SHC(Y239/240)[05m]	0.67752
	p-RAF(C-)(S338)[00m]	0.415709		p-ABL(C-)(Y245)[00m]	0.60699		p-GAB2(S159)[00m]	0.648228		p-SYK(Y525/526)[15m]	0.671593
	p-RAF(C-)(S259)[00m]	0.393452		p-EGFR(Y845)[00m]	0.597955		p-PYK2(Y402)[15m]	0.646579		p-P90RSK(S380)[00m]	0.668892
	p-CRKL(Y207)[05m]	0.387852		p-EGFR(Y1173)[00m]	0.596852		p-SRC(Y527)[00m]	0.637099		p-PI3KP85(Y458)P55(Y199)[00m]	0.657181
	p-EGFR(Y845)[00m]	0.382116		p-PDGFRA(Y754)[15m]	0.595624		p-CRKII(Y221)[15m]	0.635828		p-PDGFRA(Y754)[05m]	0.656216
	p-SRC(Y527)[05m]	0.380321		p-ZAP70(Y319)/SYK(Y352)[05m]	0.583752		p-IRS1(S1101)[05m]	0.622187		p-CRKII(Y221)[00m]	0.643885
	p-STAT6(Y641)[00m]	0.372715		p-CREB(S133)[00m]	0.565687		p-S6RIBPROT(S240/244)[00m]	0.619364		p-GAB2(S159)[00m]	0.642519
	p-PDFGRA(Y849)/…[00m]	0.371874		p-PTEN(S380)[15m]	0.563712		p-MEK(1/2)(S217/221)[05m]	0.601027		p-PYK2(Y402)[15m]	0.639
	p-PDGFRB(Y1009)[00m]	0.368162		p-FOXO1(S319)/…[15m]	0.56195		p-RAF(C-)(S338)[00m]	0.597103		p-SRC(Y527)[00m]	0.631681
	p-SHC(Y239/240)[00m]	0.367703		p-SHP2(Y542)[00m]	0.561741		p-PDGFRA(Y754)[15m]	0.587063		p-IRS1(S1101)[05m]	0.612947
	p-PKCPAN/G(T514)[00m]	0.354403		p-MTOR(S2448)[00m]	0.559601		p-PDGFRA(Y754)[00m]	0.586044		p-MEK(1/2)(S217/221)[05m]	0.598657
	p-MET(Y1349)[05m]	0.341275		p-PDGFRA(Y754)[05m]	0.552037		p-P38MAPK(T180/Y182)[15m]	0.585464		p-PDGFRA(Y754)[00m]	0.590004
	p-GSK3A(S21)[00m]	0.335837		p-PLCG2(Y759)[00m]	0.54854		p-ABL(C-)(Y245)[00m]	0.584154		p-MTOR(S2448)[15m]	0.589971
	p-PLCG1(Y783)[00m]	0.334791		p-ERBB2(Y1221/1222)[15m]	0.547052		p-AKT(S473)[00m]	0.581139		p-PDGFRA(Y754)[15m]	0.587896
	p-P90RSK(S380)[00m]	0.331584		p-FAK(Y576/577)[00m]	0.538071		p-PDGFRA(Y754)[05m]	0.579214		p-ABL(C-)(Y245)[00m]	0.579223
	p-CRKL(Y207)[00m]	0.326259		p-GSK3A(S21)[00m]	0.535447		p-EGFR(Y1173)[00m]	0.568479		p-P38MAPK(T180/Y182)[15m]	0.576512
	p-CRKII(Y221)[05m]	0.324255		p-PDGFRB(Y1009)[15m]	0.531432		p-FOXO1(S319)/…[15m]	0.55222		p-PTEN(S380)[15m]	0.576458
	p-SRC(Y527)[00m]	0.322384		p-4EBP1(T37/46)[15m]	0.51969		p-CREB(S133)[00m]	0.548131		p-PKCPAN/G(T514)[00m]	0.575719
	p-JAK1(Y1022/1023)[00m]	0.321592		p-STAT3(S727)[05m]	0.519082		p-GSK3A(S21)[00m]	0.540936		p-AKT(S473)[00m]	0.574879
	p-MEK(1/2)(S217/221)[00m]	0.318817		p-PDGFRA(Y754)[00m]	0.516898		p-PTEN(S380)[15m]	0.538344		p-RAF(C-)(S259)[00m]	0.570213
	p-PI3KP85(Y458)P55(Y199)[15m]	0.303697		p-P38MAPK(T180/Y182)[15m]	0.504647		p-MTOR(S2448)[15m]	0.53652		p-EGFR(Y1173)[00m]	0.565809
	p-P38MAPK(T180/Y182)[05m]	0.302857		p-PKCPAN/G(T514)[00m]	0.488193		p-SHP2(Y542)[00m]	0.534932		p-FOXO1(S319)/…[15m]	0.563336
	p-CRKII(Y221)[15m]	0.301018		p-ZAP70(Y319)/SYK(Y352)[00m]	0.484818		p-MTOR(S2448)[00m]	0.533772		p-CREB(S133)[00m]	0.561771
	p-FOXO1(S319)/…[15m]	0.300647		p-ERK(T202/Y204)[15m]	0.478712		p-FAK(Y576/577)[00m]	0.532879		p-ABL(C-)(Y245)[05m]	0.556535
	p-ERBB2(Y1221/1222)[00m]	0.291484		p-MET(Y1234/1235)[00m]	0.475969		p-PLCG2(Y759)[00m]	0.522363		p-ABL(C-)(Y245)[15m]	0.553681
	p-PTEN(S380)[00m]	0.288063		p-SAPK/JNK(T183/Y185)[15m]	0.473222		p-ERBB2(Y1221/1222)[15m]	0.521355		p-MTOR(S2448)[00m]	0.548709
	p-ABL(C-)(Y245)[00m]	0.287404		p-STAT3(S727)[00m]	0.470027		p-STAT3(S727)[05m]	0.504844		p-GSK3A(S21)[00m]	0.533466
	p-JAK1(Y1022/1023)[15m]	0.279589		p-MEK(1/2)(S217/221)[05m]	0.468002		p-PKCPAN/G(T514)[00m]	0.503396		p-SHP2(Y542)[00m]	0.530147
	p-MTOR(S2448)[00m]	0.279512		p-RAF(C-)(S338)[00m]	0.467338		p-PYK2(Y402)[00m]	0.483841		p-PDK1(S241)[00m]	0.526533
	p-MET(Y1349)[00m]	0.274017		p-P70S6K(T421/S424)[15m]	0.46505		p-MTOR(S2448)[05m]	0.472571		p-FAK(Y576/577)[00m]	0.52606
	p-PDGFRA(Y754)[15m]	0.255298		p-STAT3(S727)[15m]	0.451599		p-JAK1(Y1022/1023)[15m]	0.471793		p-PLCG2(Y759)[00m]	0.514983
	p-PLCG2(Y759)[00m]	0.254975		p-PTEN(S380)[05m]	0.451265		p-MET(Y1234/1235)[00m]	0.470134		p-MTOR(S2448)[05m]	0.513277
	p-SAPK/JNK(T183/Y185)[05m]	0.252314		p-PDK1(S241)[00m]	0.446807		p-PDK1(S241)[00m]	0.466123		p-STAT3(S727)[05m]	0.498952
	p-STAT5(Y694)[15m]	0.239376		p-EGFR(Y1068)[00m]	0.445698		p-ZAP70(Y319)/SYK(Y352)[00m]	0.461779		p-ZAP70(Y319)/SYK(Y352)[00m]	0.494248
	p-ERBB4(Y1284)[00m]	0.23672		p-PKCD(T505)[00m]	0.435696		p-SAPK/JNK(T183/Y185)[15m]	0.455661		p-4EBP1(T37/46)[05m]	0.486161
	p-STAT5(Y694)[00m]	0.233571		p-EGFR(Y1086)[00m]	0.435414		p-ABL(C-)(Y245)[15m]	0.451375		p-PYK2(Y402)[00m]	0.477358
	p-MTOR(S2448)[05m]	0.232823		p-IRS1(S1101)[15m]	0.430493		p-STAT3(S727)[00m]	0.448626		p-MET(Y1234/1235)[00m]	0.467675
	p-CRKL(Y207)[15m]	0.231552		p-PYK2(Y402)[00m]	0.429347		p-P70S6K(T421/S424)[15m]	0.443038		p-JAK1(Y1022/1023)[15m]	0.464785
	p-FAK(Y576/577)[00m]	0.225066		p-STAT3(Y705)[05m]	0.411903		p-4EBP1(T37/46)[05m]	0.437786		p-SAPK/JNK(T183/Y185)[15m]	0.448763
	p-STAT1(Y701)[00m]	0.224865		p-4EBP1(T37/46)[05m]	0.411245		p-STAT3(S727)[15m]	0.434452		p-STAT3(S727)[00m]	0.442674
	p-ERK(T202/Y204)[05m]	0.215251		p-GAB1(Y627)[15m]	0.40296		p-ABL(C-)(Y245)[05m]	0.431345		p-MET(Y1349)[05m]	0.437306
	p-PYK2(Y402)[00m]	0.213673		p-CDC2(Y15)[00m]	0.38648		p-PTEN(S380)[05m]	0.429782		p-P70S6K(T421/S424)[15m]	0.436405
	p-PDGFRA(Y754)[05m]	0.213657		p-SHC(Y239/240)[00m]	0.378961		p-EGFR(Y1086)[00m]	0.427297		p-PTEN(S380)[05m]	0.430788
	p-SHC(Y239/240)[15m]	0.206342		p-ERBB2(Y1221/1222)[00m]	0.376919		p-EGFR(Y1068)[00m]	0.424476		p-STAT3(S727)[15m]	0.428902
	p-FGFR1(Y653/654)[00m]	0.193315		p-FOXO3A(S253)[00m]	0.372821		p-PKCD(T505)[00m]	0.420004		p-ERBB2(Y1221/1222)[00m]	0.425898
	p-STAT3(S727)[15m]	0.183745		p-SRC(Y527)[15m]	0.372125		p-ERBB2(Y1221/1222)[00m]	0.417408		p-IRS1(S1101)[15m]	0.423721
	p-GAB1(Y627)[15m]	0.173889		p-ABL(C-)(Y245)[15m]	0.371374		p-SHC(Y239/240)[15m]	0.414052		p-EGFR(Y1068)[00m]	0.423125
	p-FOXO1(S319)/…[05m]	0.173785		p-GAB1(Y627)[05m]	0.370784		p-IRS1(S1101)[15m]	0.410149		p-EGFR(Y1086)[00m]	0.421078
	p-ABL(C-)(Y245)[15m]	0.165505		p-AKT(S473)[00m]	0.370531		p-STAT3(Y705)[05m]	0.397871		p-GAB1(Y627)[15m]	0.418509
	p-FOXO1(S319)/…[00m]	0.164859		p-CRKL(Y207)[05m]	0.362939		p-SRC(Y527)[15m]	0.396931		p-PKCD(T505)[00m]	0.414359
	p-SHP2(Y542)[00m]	0.152867		p-4EBP1(S65)[15m]	0.362268		p-GAB1(Y627)[15m]	0.387688		p-SHC(Y239/240)[15m]	0.408216
	p-MET(Y1349)[15m]	0.152262		p-RAF(C-)(S259)[00m]	0.348847		p-CDC2(Y15)[00m]	0.381186		p-CDC2(Y15)[15m]	0.404267
	p-KIT(C-)(Y719)[00m]	0.142229		p-PDFGRA(Y849)/…[00m]	0.343766		p-CRKL(Y207)[05m]	0.362569		p-STAT3(Y705)[05m]	0.399104
	p-MEK(1/2)(S217/221)[05m]	0.140306		p-JAK1(Y1022/1023)[05m]	0.342289		p-SHC(Y239/240)[00m]	0.361295		p-SRC(Y527)[15m]	0.394389
	p-ABL(C-)(Y245)[05m]	0.137447		p-SHC(Y239/240)[15m]	0.339761		p-FOXO3A(S253)[00m]	0.358293		p-CDC2(Y15)[00m]	0.377863
	p-CDC2(Y15)[15m]	0.129633		p-MET(Y1349)[05m]	0.311349		p-GAB1(Y627)[05m]	0.354866		p-GAB1(Y627)[05m]	0.374978
	p-PI3KP85(Y458)P55(Y199)[00m]	0.123964		p-SRC(Y527)[05m]	0.30597		p-4EBP1(S65)[15m]	0.344985		p-CRKL(Y207)[05m]	0.366322
	p-MTOR(S2448)[15m]	0.109168		p-SAPK/JNK(T183/Y185)[05m]	0.296408		p-RAF(C-)(S259)[00m]	0.342984		p-SHC(Y239/240)[00m]	0.357869
	p-CREB(S133)[15m]	0.0941809		p-ABL(C-)(Y245)[05m]	0.280646		p-PDFGRA(Y849)/…[00m]	0.342449		p-FOXO3A(S253)[00m]	0.355998
	p-CRKII(Y221)[00m]	0.0928367		p-STAT6(Y641)[00m]	0.277247		p-SRC(Y527)[05m]	0.313747		p-PDFGRA(Y849)/…[00m]	0.339965
	p-P70S6K(T421/S424)[00m]	0.0906921		p-MTOR(S2448)[05m]	0.276853		p-PI3KP85(Y458)P55(Y199)[15m]	0.313136		p-4EBP1(S65)[15m]	0.339766
	p-SYK(Y525/526)[00m]	0.0772685		p-PI3KP85(Y458)P55(Y199)[15m]	0.260413		p-SAPK/JNK(T183/Y185)[05m]	0.302158		p-PI3KP85(Y458)P55(Y199)[15m]	0.326925
	p-ERK(T202/Y204)[00m]	0.0465512		p-JAK1(Y1022/1023)[15m]	0.241792		p-MET(Y1349)[05m]	0.300232		p-SAPK/JNK(T183/Y185)[05m]	0.319797
	p-PI3KP85(Y458)P55(Y199)[05m]	0.0412456		p-CRKL(Y207)[15m]	0.237297		p-STAT6(Y641)[00m]	0.282363		p-SRC(Y527)[05m]	0.312381
	p-SAPK/JNK(T183/Y185)[15m]	0.0263707		p-STAT5(Y694)[15m]	0.209704		p-STAT5(Y694)[15m]	0.267083		p-CRKL(Y207)[15m]	0.290021
	p-SAPK/JNK(T183/Y185)[00m]	0.0246707		p-CDC2(Y15)[15m]	0.159785		p-CRKL(Y207)[15m]	0.266461		p-STAT5(Y694)[15m]	0.289909
	p-SRC(Y416)[00m]	0.0230047		p-CREB(S133)[15m]	0.111799		p-CDC2(Y15)[15m]	0.237746		p-CREB(S133)[15m]	0.281265
	p-S6RIBPROT(S240/244)[00m]	0.00185233		p-PI3KP85(Y458)P55(Y199)[05m]	0.0886536		p-CREB(S133)[15m]	0.225835		p-STAT6(Y641)[00m]	0.278217
	p-GAB1(Y627)[00m]	0.00117543		p-MTOR(S2448)[15m]	0.078494		p-PI3KP85(Y458)P55(Y199)[05m]	0.141526		p-PI3KP85(Y458)P55(Y199)[05m]	0.196431
