# Supplementary material for: The DIONESUS algorithm provides scalable and accurate reconstruction of dynamic phosphoproteomic networks to reveal new drug targets
Source: Royal Society of Chemistry journal article supplement (doi:10.1039/c5ib00065c), 2015-01-01
Supplement: c5ib00065c12.xlsx [file c5ib00065c12.xlsx]

## Sheet: Sheet1
Supplementary Table 7. Input matrix for network inference
*Missing Data = Bold				Explanatory Variables (Continuous)
VARIABLE NUMBER				1	2	3	4	5	6	7	8	9	10	11	12	13	14	15	16	17	18	19	20	21	22	23	24	25	26	27	28	29	30	31	32	33	34	35	36	37	38	39	40	41	42	43	44	45	46
GENE1				ABL1	AKT1	CDK1	CDK2	CREB1	CRK	CRKL	EGFR	EGFR	EGFR	EGFR	EIF4EP1	EIF4EP1	ERBB2	ERBB4	FGFR1	FOXO1	FOXO3	FRAP1	GAB1	GAB2	GSK3A	IGF1R	IRS1	JAK1	KIT	MAP2K1	MAPK1	MAPK13	MAPK8	MET	MET	PDGFRA	PDGFRA	PDGFRB	PDPK1	PIK3R2	PLCG1	PLCG2	PRKCA	PRKCD	PTEN	PTK2	PTK2B	PTPN11	RAF1
GENE2																				FOXO4						INSR				MAP2K2	MAPK3	MAPK14	MAPK9				PDGFRB			PIK3R3			PRKCB
GENE3																																MAPK11	MAPK10										PRKCD
GENE4																																											PRKCG
GENE5																																											PRKCE
GENE6																																											PRKCH
PHOSPHOSITE1				Y245	S473	Y15	T160	S133	Y221	Y207	Y1068	Y1086	Y1173	Y845	S65	T37	Y1221	Y1284	Y653	S319	S253	S2448	Y627	S159	S21	Y1135(IGF1R)	S1101	Y1022	Y719	S217	T202	T180	T183	Y1234	Y1349	Y754	Y849(PDGFRA)	Y1009	S241	Y458(PIK3R2)	Y783	Y759	T514(PRKCG)	T505	S380	Y576	Y402	Y542	S259
PHOSPHOSITE2																T46	Y1222		Y654	S262						Y1136(IGF1R)		Y1023		Y221	Y204	Y182	Y185	Y1235			Y857(PDGFRB)			Y199(PIK3R3)						Y577
PHOSPHOSITE4
FULL ANTIBODY/PERTURBATION NAME			TIME	p-ABL(C-)(Y245)	p-AKT(S473)	p-CDC2(Y15)	p-CDK2(T160)	p-CREB(S133)	p-CRKII(Y221)	p-CRKL(Y207)	p-EGFR(Y1068)	p-EGFR(Y1086)	p-EGFR(Y1173)	p-EGFR(Y845)	p-4EBP1(S65)	p-4EBP1(T37/46)	p-ERBB2(Y1221/1222)	p-ERBB4(Y1284)	p-FGFR1(Y653/654)	p-FOXO1(S319)/FOXO4(S262)	p-FOXO3A(S253)	p-MTOR(S2448)	p-GAB1(Y627)	p-GAB2(S159)	p-GSK3A(S21)	p-IGF1RB(Y1135/1136)/INSRB	p-IRS1(S1101)	p-JAK1(Y1022/1023)	p-KIT(C-)(Y719)	p-MEK(1/2)(S217/221)	p-ERK1/2(T202/Y204)	p-P38MAPK(T180/Y182)	p-SAPK/JNK(T183/Y185)	p-MET(Y1234/1235)	p-MET(Y1349)	p-PDGFRA(Y754)	p-PDFGRA(Y849)/PDGFRB(Y857)	p-PDGFRB(Y1009)	p-PDK1(S241)	p-PI3KP85(Y458)P55(Y199)	p-PLCG1(Y783)	p-PLCG2(Y759)	p-PKCPAN/G(T514)	p-PKCD(T505)	p-PTEN(S380)	p-FAK(Y576/577)	p-PYK2(Y402)	p-SHP2(Y542)	p-RAF(C-)(S259)
Media X1			-30	0	0	0	0	0	0	0	0	0	0	0	0	0	0	0	0	0	0	0	0	0	0	0	0	0	0	0	0	0	0	0	0	0	0	0	0	0	0	0	0	0	0	0	0	0	0
EGF200 X1			-30	0	0	0	0	0	0	0	0	0	0	0	0	0	0	0	0	0	0	0	0	0	0	0	0	0	0	0	0	0	0	0	0	0	0	0	0	0	0	0	0	0	0	0	0	0	0
EGF200+Insulin200 X1200200 X1			-30	0	0	0	0	0	0	0	0	0	0	0	0	0	0	0	0	0	0	0	0	0	0	0	0	0	0	0	0	0	0	0	0	0	0	0	0	0	0	0	0	0	0	0	0	0	0
HGF200 X1			-30	0	0	0	0	0	0	0	0	0	0	0	0	0	0	0	0	0	0	0	0	0	0	0	0	0	0	0	0	0	0	0	0	0	0	0	0	0	0	0	0	0	0	0	0	0	0
HGF200+Insulin200 X1200200 X1			-30	0	0	0	0	0	0	0	0	0	0	0	0	0	0	0	0	0	0	0	0	0	0	0	0	0	0	0	0	0	0	0	0	0	0	0	0	0	0	0	0	0	0	0	0	0	0
Insulin200 X1			-30	0	0	0	0	0	0	0	0	0	0	0	0	0	0	0	0	0	0	0	0	0	0	0	0	0	0	0	0	0	0	0	0	0	0	0	0	0	0	0	0	0	0	0	0	0	0
IGF200 X1			-30	0	0	0	0	0	0	0	0	0	0	0	0	0	0	0	0	0	0	0	0	0	0	0	0	0	0	0	0	0	0	0	0	0	0	0	0	0	0	0	0	0	0	0	0	0	0
Media X2			-30	0	0	0	0	0	0	0	0	0	0	0	0	0	0	0	0	0	0	0	0	0	0	0	0	0	0	0	0	0	0	0	0	0	0	0	0	0	0	0	0	0	0	0	0	0	0
EGF200 X2			-30	0	0	0	0	0	0	0	0	0	0	0	0	0	0	0	0	0	0	0	0	0	0	0	0	0	0	0	0	0	0	0	0	0	0	0	0	0	0	0	0	0	0	0	0	0	0
EGF200 PP2 X2			-30	0	0	0	0	0	0	0	0	0	0	0	0	0	0	0	0	0	0	0	0	0	0	0	0	0	0	0	0	0	0	0	0	0	0	0	0	0	0	0	0	0	0	0	0	0	0
EGF200 U73122 X2			-30	0	0	0	0	0	0	0	0	0	0	0	0	0	0	0	0	0	0	0	0	0	0	0	0	0	0	0	0	0	0	0	0	0	0	0	0	0	0	0	0	0	0	0	0	0	0
EGF200 Wortmannin X2			-30	0	0	0	0	0	0	0	0	0	0	0	0	0	0	0	0	0	0	0	0	0	0	0	0	0	0	0	0	0	0	0	0	0	0	0	0	0	0	0	0	0	0	0	0	0	0
Media X3			-30	0	0	0	0	0	0	0	0	0	0	0	0	0	0	0	0	0	0	0	0	0	0	0	0	0	0	0	0	0	0	0	0	0	0	0	0	0	0	0	0	0	0	0	0	0	0
EGF200 X3			-30	0	0	0	0	0	0	0	0	0	0	0	0	0	0	0	0	0	0	0	0	0	0	0	0	0	0	0	0	0	0	0	0	0	0	0	0	0	0	0	0	0	0	0	0	0	0
EGF200 Aprotinin X3			-30	0	0	0	0	0	0	0	0	0	0	0	0	0	0	0	0	0	0	0	0	0	0	0	0	0	0	0	0	0	0	0	0	0	0	0	0	0	0	0	0	0	0	0	0	0	0
EGF200 GM6001 X3			-30	0	0	0	0	0	0	0	0	0	0	0	0	0	0	0	0	0	0	0	0	0	0	0	0	0	0	0	0	0	0	0	0	0	0	0	0	0	0	0	0	0	0	0	0	0	0
EGF200 TAPI-1 X3			-30	0	0	0	0	0	0	0	0	0	0	0	0	0	0	0	0	0	0	0	0	0	0	0	0	0	0	0	0	0	0	0	0	0	0	0	0	0	0	0	0	0	0	0	0	0	0
Media X4			-30	0	0	0	0	0	0	0	0	0	0	0	0	0	0	0	0	0	0	0	0	0	0	0	0	0	0	0	0	0	0	0	0	0	0	0	0	0	0	0	0	0	0	0	0	0	0
EGF200 X4			-30	0	0	0	0	0	0	0	0	0	0	0	0	0	0	0	0	0	0	0	0	0	0	0	0	0	0	0	0	0	0	0	0	0	0	0	0	0	0	0	0	0	0	0	0	0	0
EGF200 CAPE X4			-30	0	0	0	0	0	0	0	0	0	0	0	0	0	0	0	0	0	0	0	0	0	0	0	0	0	0	0	0	0	0	0	0	0	0	0	0	0	0	0	0	0	0	0	0	0	0
EGF200 N-Acetylcysteine X4			-30	0	0	0	0	0	0	0	0	0	0	0	0	0	0	0	0	0	0	0	0	0	0	0	0	0	0	0	0	0	0	0	0	0	0	0	0	0	0	0	0	0	0	0	0	0	0
Media X5			-30	0	0	0	0	0	0	0	0	0	0	0	0	0	0	0	0	0	0	0	0	0	0	0	0	0	0	0	0	0	0	0	0	0	0	0	0	0	0	0	0	0	0	0	0	0	0
EGF200 X5			-30	0	0	0	0	0	0	0	0	0	0	0	0	0	0	0	0	0	0	0	0	0	0	0	0	0	0	0	0	0	0	0	0	0	0	0	0	0	0	0	0	0	0	0	0	0	0
EGF200 DPI X5			-30	0	0	0	0	0	0	0	0	0	0	0	0	0	0	0	0	0	0	0	0	0	0	0	0	0	0	0	0	0	0	0	0	0	0	0	0	0	0	0	0	0	0	0	0	0	0
EGF200 Clostridium Toxin B X5			-30	0	0	0	0	0	0	0	0	0	0	0	0	0	0	0	0	0	0	0	0	0	0	0	0	0	0	0	0	0	0	0	0	0	0	0	0	0	0	0	0	0	0	0	0	0	0
EGF200 PHPS2 X5			-30	0	0	0	0	0	0	0	0	0	0	0	0	0	0	0	0	0	0	0	0	0	0	0	0	0	0	0	0	0	0	0	0	0	0	0	0	0	0	0	0	0	0	0	0	0	0
Media X6			-30	0	0	0	0	0	0	0	0	0	0	0	0	0	0	0	0	0	0	0	0	0	0	0	0	0	0	0	0	0	0	0	0	0	0	0	0	0	0	0	0	0	0	0	0	0	0
EGF200 X6			-30	0	0	0	0	0	0	0	0	0	0	0	0	0	0	0	0	0	0	0	0	0	0	0	0	0	0	0	0	0	0	0	0	0	0	0	0	0	0	0	0	0	0	0	0	0	0
EGF200 DPI X6			-30	0	0	0	0	0	0	0	0	0	0	0	0	0	0	0	0	0	0	0	0	0	0	0	0	0	0	0	0	0	0	0	0	0	0	0	0	0	0	0	0	0	0	0	0	0	0
EGF200 PP2 X6			-30	0	0	0	0	0	0	0	0	0	0	0	0	0	0	0	0	0	0	0	0	0	0	0	0	0	0	0	0	0	0	0	0	0	0	0	0	0	0	0	0	0	0	0	0	0	0
EGF200 EMBPTP1BI X6			-30	0	0	0	0	0	0	0	0	0	0	0	0	0	0	0	0	0	0	0	0	0	0	0	0	0	0	0	0	0	0	0	0	0	0	0	0	0	0	0	0	0	0	0	0	0	0
Media X1			0	0	0.519429	0.424206	0.346868	0.168246	-0.10287	0.171944	0.731465	0.741304	0.811877	0.454525	0.984022	0.312029	0.439075	0.00422709	-0.213232	-0.816938	0.541133	0.0494934	-0.214779	1.09959	0.290185	2.2922	0.476039	0.429762	-0.413753	-1.29206	-0.561578	-2.86543	-0.510123	0.613398	0.0172766	1.06569	0.46467	0.344348	0.503795	-0.281398	0.276411	0.0493105	0.257303	0.387813	-0.171372	0.247424	-0.0735119	-0.0833885	0.306597
EGF200 X1			0	0	0.519429	0.424206	0.346868	0.168246	-0.10287	0.171944	0.731465	0.741304	0.811877	0.454525	0.984022	0.312029	0.439075	0.00422709	-0.213232	-0.816938	0.541133	0.0494934	-0.214779	1.09959	0.290185	2.2922	0.476039	0.429762	-0.413753	-1.29206	-0.561578	-2.86543	-0.510123	0.613398	0.0172766	1.06569	0.46467	0.344348	0.503795	-0.281398	0.276411	0.0493105	0.257303	0.387813	-0.171372	0.247424	-0.0735119	-0.0833885	0.306597
EGF200+Insulin200 X1200200 X1			0	0	0.519429	0.424206	0.346868	0.168246	-0.10287	0.171944	0.731465	0.741304	0.811877	0.454525	0.984022	0.312029	0.439075	0.00422709	-0.213232	-0.816938	0.541133	0.0494934	-0.214779	1.09959	0.290185	2.2922	0.476039	0.429762	-0.413753	-1.29206	-0.561578	-2.86543	-0.510123	0.613398	0.0172766	1.06569	0.46467	0.344348	0.503795	-0.281398	0.276411	0.0493105	0.257303	0.387813	-0.171372	0.247424	-0.0735119	-0.0833885	0.306597
HGF200 X1			0	0	0.519429	0.424206	0.346868	0.168246	-0.10287	0.171944	0.731465	0.741304	0.811877	0.454525	0.984022	0.312029	0.439075	0.00422709	-0.213232	-0.816938	0.541133	0.0494934	-0.214779	1.09959	0.290185	2.2922	0.476039	0.429762	-0.413753	-1.29206	-0.561578	-2.86543	-0.510123	0.613398	0.0172766	1.06569	0.46467	0.344348	0.503795	-0.281398	0.276411	0.0493105	0.257303	0.387813	-0.171372	0.247424	-0.0735119	-0.0833885	0.306597
HGF200+Insulin200 X1200200 X1			0	0	0.519429	0.424206	0.346868	0.168246	-0.10287	0.171944	0.731465	0.741304	0.811877	0.454525	0.984022	0.312029	0.439075	0.00422709	-0.213232	-0.816938	0.541133	0.0494934	-0.214779	1.09959	0.290185	2.2922	0.476039	0.429762	-0.413753	-1.29206	-0.561578	-2.86543	-0.510123	0.613398	0.0172766	1.06569	0.46467	0.344348	0.503795	-0.281398	0.276411	0.0493105	0.257303	0.387813	-0.171372	0.247424	-0.0735119	-0.0833885	0.306597
Insulin200 X1			0	0	0.519429	0.424206	0.346868	0.168246	-0.10287	0.171944	0.731465	0.741304	0.811877	0.454525	0.984022	0.312029	0.439075	0.00422709	-0.213232	-0.816938	0.541133	0.0494934	-0.214779	1.09959	0.290185	2.2922	0.476039	0.429762	-0.413753	-1.29206	-0.561578	-2.86543	-0.510123	0.613398	0.0172766	1.06569	0.46467	0.344348	0.503795	-0.281398	0.276411	0.0493105	0.257303	0.387813	-0.171372	0.247424	-0.0735119	-0.0833885	0.306597
IGF200 X1			0	0	0.519429	0.424206	0.346868	0.168246	-0.10287	0.171944	0.731465	0.741304	0.811877	0.454525	0.984022	0.312029	0.439075	0.00422709	-0.213232	-0.816938	0.541133	0.0494934	-0.214779	1.09959	0.290185	2.2922	0.476039	0.429762	-0.413753	-1.29206	-0.561578	-2.86543	-0.510123	0.613398	0.0172766	1.06569	0.46467	0.344348	0.503795	-0.281398	0.276411	0.0493105	0.257303	0.387813	-0.171372	0.247424	-0.0735119	-0.0833885	0.306597
Media X2			0	0	-0.165974	-0.0411451	-0.0208277	0.249105	0	-0.136421	0.23535	0.00933418	0.120102	0.0339765	-0.0665084	0.00884583	-0.397545	-0.000979044	0.0162996	0.0742258	-0.0287722	-0.222611	-0.0206124	0.0463795	-0.0719756	0.0928148	-0.376771	-0.155098	0.0921061	-0.167342	0.187957	-0.167325	0.0444487	0.0116913	-0.63101	0.028014	0	-0.0103885	0.0745622	0.0411448	0.00938157	0.00376788	0.0630933	0	0.067602	-0.290419	0.172888	-0.0924492	-0.499838
EGF200 X2			0	0	-0.165974	-0.0411451	-0.0208277	0.249105	0	-0.136421	0.23535	0.00933418	0.120102	0.0339765	-0.0665084	0.00884583	-0.397545	-0.000979044	0.0162996	0.0742258	-0.0287722	-0.222611	-0.0206124	0.0463795	-0.0719756	0.0928148	-0.376771	-0.155098	0.0921061	-0.167342	0.187957	-0.167325	0.0444487	0.0116913	-0.63101	0.028014	0	-0.0103885	0.0745622	0.0411448	0.00938157	0.00376788	0.0630933	0	0.067602	-0.290419	0.172888	-0.0924492	-0.499838
EGF200 PP2 X2			0	0	-1.30843	-0.117507	-0.0532624	-0.111745	0	-0.872114	0.436352	-0.168081	0.217296	-0.932098	-0.736554	-0.815664	-0.520023	-0.104678	-0.113519	0.0261027	-0.0873007	-0.231286	-0.23091	0.20227	-0.253708	0.340903	-0.520388	-0.267841	0.0669701	-0.61925	-0.557781	-2.33548	-0.0509404	-0.0219929	-0.555729	0.112892	0	-0.275771	0.121196	-0.095578	-0.072853	-0.0858371	0.0411844	0	0.00242084	-0.090082	0.273603	-0.15133	-0.261291
EGF200 U73122 X2			0	0	0.162269	0.0239684	0.127729	0.100635	0	0.117098	0.362405	-0.200162	0.374233	0.168287	-0.230078	-0.252227	-0.459961	-0.415727	0.201758	0.173596	-0.0987762	-0.252246	0.226063	0.22954	0.0511477	0.536001	-0.556054	-0.167221	0.241268	0.042595	0.302217	-0.0726997	0.190872	0.132313	-0.889896	-0.0135185	0	-0.0087998	0.149404	0.236368	0.165296	0.101724	0.21341	0	0.116467	-0.205618	0.74705	0.033505	-0.581123
EGF200 Wortmannin X2			0	0	-2.42288	0.0828535	0.343921	0.028801	0	-0.059815	0.403864	0.0251726	0.492258	0.158749	-1.08202	-1.04876	-0.400018	-0.486044	-0.0643135	0.0930248	-0.110183	-0.114178	-0.0378777	0.430289	-0.188865	0.38396	-0.369349	-0.141606	0.178755	-0.31155	-0.379494	0.438871	0.191279	0.110574	-0.609988	0.120191	0	0.0254871	0.207998	0.0722225	0.22454	0.0837453	0.124198	0	0.0854363	-0.107731	0.813746	-0.0253633	-0.383242
Media X3			0	0.0313406	7.92993	0.451177	3.9668	0.137299	1.27513	0.415701	0.191003	0.233828	0.392138	-0.142566	0.265407	-0.0284496	0.31468	0.137478	-0.0063673	-0.00983123	0.746249	0.15339	0.36818	0.03341	0.704758	0.288015	-0.131855	-0.0725256	0	-0.54624	-0.425659	1.90662	0.16002	0.2843	0.24256	0.193877	0.182884	-0.367562	1.1004	0.645208	0.99054	0.077599	6.27205	-0.0178596	0.0230817	0.0627943	0.160742	0.79664	0.836664
EGF200 X3			0	0.0313406	7.92993	0.451177	3.9668	0.137299	1.27513	0.415701	0.191003	0.233828	0.392138	-0.142566	0.265407	-0.0284496	0.31468	0.137478	-0.0063673	-0.00983123	0.746249	0.15339	0.36818	0.03341	0.704758	0.288015	-0.131855	-0.0725256	0	-0.54624	-0.425659	1.90662	0.16002	0.2843	0.24256	0.193877	0.182884	-0.367562	1.1004	0.645208	0.99054	0.077599	6.27205	-0.0178596	0.0230817	0.0627943	0.160742	0.79664	0.836664
EGF200 Aprotinin X3			0	0.0789089	7.18937	0.391596	4.94227	0.200942	2.2599	0.419815	0.436874	0.320768	-0.299658	-0.0716488	0.16313	-0.205722	0.696127	0.341577	0.138818	0.178721	0.958921	0.334588	0.712032	0.0344479	0.89344	0.74689	0.0196442	0.464084	0	-0.641783	-0.364919	2.88979	0.29402	0.169686	0.34078	0.531789	0.562699	-0.241744	1.88445	0.946854	0.943327	0.165662	10.649	0.0964903	0.00911323	0.117343	0.455928	1.55841	1.236
EGF200 GM6001 X3			0	0.0497747	5.52775	0.556565	3.09394	0.554756	2.35966	0.40248	0.471567	0.308756	-0.0962549	0.134385	0.137737	-0.00234058	1.16267	0.548276	-0.185322	0.414735	0.629333	0.248378	0.721299	0.157496	1.04505	0.888371	0.0847185	0.123881	0	-0.716637	-0.159212	2.12349	0.413128	0.405399	0.220276	0.760232	0.615956	-0.0819913	2.1028	0.66873	1.10645	0.336123	6.09093	0.123149	0.154922	0.156216	0.555252	0.811632	0.871868
EGF200 TAPI-1 X3			0	0.278689	4.91141	1.38984	3.62383	0.855815	3.58022	0.651262	0.897441	1.04363	0.561796	1.2337	0.186876	0.138467	1.96577	0.839437	0.140529	0.673721	1.05199	0.452545	0.566026	0.234341	1.28413	0.910017	0.20904	1.3643	0	-0.103595	-0.0965238	2.45727	0.544829	0.851724	0.362023	1.12909	1.23243	2.27127	2.52301	0.602111	2.73955	1.01087	3.71526	0.558919	0.377174	0.884911	0.666692	1.5936	0.907786
Media X4			0	0.00155598	4.7712	1.56299	3.81406	-0.024459	0.196916	0.432621	0.437908	0.657122	0.371293	0.175879	0	-0.299764	0.0854425	0.25908	0.0499462	0.413058	2.05134	0.7767	0.260922	-0.12821	0.210608	1.7707	0.103217	0.425701	0.108854	0.285152	1.02121	4.07114	0.52002	0.0839377	0.0834383	0.29761	1.58635	-0.153515	1.44442	0.271017	-0.108357	0.211441	3.7728	0.756101	-0.0466501	0.14355	0.39209	0.734973	0.0208486
EGF200 X4			0	0.00155598	4.7712	1.56299	3.81406	-0.024459	0.196916	0.432621	0.437908	0.657122	0.371293	0.175879	0	-0.299764	0.0854425	0.25908	0.0499462	0.413058	2.05134	0.7767	0.260922	-0.12821	0.210608	1.7707	0.103217	0.425701	0.108854	0.285152	1.02121	4.07114	0.52002	0.0839377	0.0834383	0.29761	1.58635	-0.153515	1.44442	0.271017	-0.108357	0.211441	3.7728	0.756101	-0.0466501	0.14355	0.39209	0.734973	0.0208486
EGF200 CAPE X4			0	0.00282368	1.56735	1.78058	1.67546	0.00444663	0.287489	0.390945	0.359864	1.05025	0.660148	0.295993	0	-0.142318	0.248509	0.368038	0.394687	0.0157536	1.63944	0.432599	0.560646	-0.205221	0.147009	1.83617	0.202059	0.4349	0.624028	0.183463	0.559343	2.66984	0.704557	0.442943	-0.00404234	0.124061	2.19238	0.0368671	0.00416615	0.371093	0.00326158	0.791618	1.39662	1.18636	-0.558421	0.565083	-0.0275704	0.748918	-0.356163
EGF200 N-Acetylcysteine X4			0	-0.761907	-0.0261746	0.798193	2.0135	-0.288581	-0.0558792	0.208341	-0.806757	0.523486	0.113313	-0.167146	0	0.0418772	0.0587076	-0.0118031	-0.0241867	-1.3395	0.221579	0.273774	0.0501365	-0.302635	-1.08097	-0.133636	-0.0255739	-0.287391	0.0508857	-0.213408	0.776061	1.36579	1.2691	-0.164313	-0.285081	-0.609352	1.3752	0.0178972	0.379905	1.28494	-0.136539	0.476503	0.476519	0.9842	-0.063703	0.347211	-0.566014	0.714563	-0.482681
Media X5			0	0.232445	-0.834336	0.214219	0	-0.409292	0.120072	-0.41702	0.362315	0.488371	0.013033	0.0658008	-0.053738	-0.362971	0.33216	0.247158	-0.579649	0	0.0527218	0.203494	-0.48565	0.0356476	0.316552	0.628187	0.0503782	0.155768	-0.477021	-0.21503	0.0643066	-0.0487355	-0.211091	0.163079	0.195576	-0.0287708	0.28615	-0.35707	0.475034	-0.346113	-0.430921	0.127166	-0.257259	0.170318	-0.391358	-0.0134451	0.323582	-0.286209	1.00367
EGF200 X5			0	0.232445	-0.834336	0.214219	0	-0.409292	0.120072	-0.41702	0.362315	0.488371	0.013033	0.0658008	-0.053738	-0.362971	0.33216	0.247158	-0.579649	0	0.0527218	0.203494	-0.48565	0.0356476	0.316552	0.628187	0.0503782	0.155768	-0.477021	-0.21503	0.0643066	-0.0487355	-0.211091	0.163079	0.195576	-0.0287708	0.28615	-0.35707	0.475034	-0.346113	-0.430921	0.127166	-0.257259	0.170318	-0.391358	-0.0134451	0.323582	-0.286209	1.00367
EGF200 DPI X5			0	0.549093	-0.972529	0.262971	0	-0.621472	0.412853	-0.580013	1.00358	0.833288	0.0438585	-0.0704734	-0.251167	-0.530589	0.757724	0.506158	-0.58298	0	0.583562	0.42219	-0.294216	0.0947046	0.629235	0.99855	0.249006	0.866952	-0.91054	-0.446423	0.490197	0.275417	-0.370097	-0.216927	0.34257	0.206955	0.765365	-0.181544	0.966899	-0.771065	-0.42674	0.0158838	0.0113245	0.425938	-0.415654	0.0860661	0.203941	-0.370199	1.55344
EGF200 Clostridium Toxin B X5			0	0.221385	-1.09791	0.192014	0	-0.916254	0.179788	-0.582494	0.708204	0.349241	0.082278	-0.0415952	-0.338324	-0.774415	0.535783	0.549884	-0.594095	0	0.713755	0.274521	-0.622391	0.0840908	0.366628	0.419178	0.233845	0.308847	-0.872287	-0.319533	0.159001	-0.534776	-0.346116	-0.247214	0.137374	0.0806614	0.583821	-0.763083	0.580298	-0.609605	-1.00437	-0.258073	-0.25415	0.202769	-0.405588	0.152854	0.496891	-0.737326	0.92992
EGF200 PHPS2 X5			0	0.470472	-0.71117	0.601212	0	-0.795086	0.849024	-0.472345	1.28733	1.00134	0.266039	0.0825627	-0.0379845	-0.522975	1.10785	1.01706	-0.442944	0	0.816296	0.504185	-0.159354	0.141309	0.71088	0.863568	0.33293	1.79657	-0.748004	-0.530169	0.338357	-0.181426	-0.216176	0.114672	0.283657	0.572692	1.37838	-0.129017	1.28284	-0.836405	-0.200819	-0.0367356	-0.130748	0.623001	-0.423158	0.994491	0.336958	-0.191337	1.06057
Media X6			0	0.30117	1.77405	0.277654	10.1774	0.62299	0.298397	0.499992	0.200985	0.413368	0.785958	0.980601	0	0.340249	2.47447	-0.116658	1.09655	-0.246574	1.1305	0.305837	-0.0775021	0.452306	0.413077	-0.137107	0.186802	-0.0272091	-0.0538145	-0.356552	-0.569688	0.66758	-0.23801	0.628282	0.0368202	0.00535125	0.105358	0.237904	0.770499	0.199946	-0.00290117	0.431951	1.91688	0.0441352	-0.149987	0.857467	0.344125	0.683793	0.84006
EGF200 X6			0	0.30117	1.77405	0.277654	10.1774	0.62299	0.298397	0.499992	0.200985	0.413368	0.785958	0.980601	0	0.340249	2.47447	-0.116658	1.09655	-0.246574	1.1305	0.305837	-0.0775021	0.452306	0.413077	-0.137107	0.186802	-0.0272091	-0.0538145	-0.356552	-0.569688	0.66758	-0.23801	0.628282	0.0368202	0.00535125	0.105358	0.237904	0.770499	0.199946	-0.00290117	0.431951	1.91688	0.0441352	-0.149987	0.857467	0.344125	0.683793	0.84006
EGF200 DPI X6			0	0.504638	2.18005	0.149766	12.2525	1.10435	0.796497	0.416528	0.216966	0.276476	0.483576	0.903246	0	0.206996	2.74046	-0.164016	1.15214	-0.276892	1.37292	0.387698	0.209579	0.788451	0.344498	0.035211	0.369067	0.0895485	0.0564191	0.0165293	-0.0468778	1.96624	-0.432984	0.426573	0.15108	0.563586	0.105022	0.313941	1.22687	0.634642	0.00314333	0.297869	3.3401	0.336042	0.00862558	1.73181	0.58986	1.17133	1.25078
EGF200 PP2 X6			0	0.579429	1.42487	0.311867	11.1397	1.36142	0.580452	0.507919	0.588	1.02542	1.68586	0.850023	0	0.488678	1.618	-0.371319	1.56278	-0.0264401	1.16576	0.338739	0.291248	0.599343	0.0312246	0.0128978	0.154675	-0.265966	0.202811	0.0553671	-0.271277	0.813176	-0.894866	1.51148	-0.041364	0.754038	0.338359	0.178547	0.849492	0.957593	0.263432	1.13554	3.29757	0.509285	0.271831	1.68052	0.352536	1.03743	0.914899
EGF200 EMBPTP1BI X6			0	0.941312	3.22016	0.473636	13.6031	1.81183	0.80451	1.39298	0.871735	1.40882	2.46861	2.16801	0	0.699042	1.5349	0.0181413	1.83305	0.137268	2.05676	1.07929	0.511939	0.730561	0.673328	0.299632	0.149164	-0.266491	0.371208	0.268515	-0.185106	1.81723	-0.29718	1.85761	-0.0981519	1.13744	0.619311	0.821049	1.63307	1.51293	0.687529	1.39019	4.77025	1.21412	0.364289	2.31277	0.672814	1.37552	1.57547
Media X1			5	0	1.30098	0.0780682	1.47984	0.863057	0.0665812	0.341883	0.165499	0.655985	1.04125	0.40116	0.834148	0.163354	0.190104	0.0186923	0.278586	-0.694736	0.0175361	-0.264192	0.0560746	1.01773	0.299017	1.22723	0.330494	0.216341	-0.276294	-2.07594	-1.52067	-1.33961	-0.289972	0.510536	-0.201165	0.481493	0.0638496	0.389507	0.365558	0.147962	0.170087	-0.0395921	1.15034	0.451843	0.235441	-0.0869571	-0.0429288	0.140517	-0.0385257
EGF200 X1			5	0	1.70956	0.216628	1.56382	1.32109	0.815126	0.659401	2.83584	7.18576	5.8593	5.42825	0.636664	0.207889	0.619984	0.0797607	1.73667	-0.25735	0.238333	-0.308932	0.658983	0.598198	0.729473	2.40586	0.712303	1.25275	0.710608	0.929988	0.822851	-0.77984	0.129282	6.32439	0.231314	1.16888	1.73653	1.80012	0.380104	0.499908	4.01917	3.62771	1.38247	0.992847	0.290301	0.604767	0.852365	1.04811	-0.120274
EGF200+Insulin200 X1200200 X1			5	0	3.35087	0.46299	2.58282	0.451472	1.93362	0.4832	4.80398	11.9763	6.18812	4.91434	0.163017	-0.350703	0.742994	0.594167	1.9618	0.0201662	0.665685	0.111619	1.19419	1.17871	1.59002	3.371	1.33123	2.64952	0.666596	1.30372	1.13382	0.11462	0.326405	6.3282	0.776934	1.59736	3.15131	1.98319	1.36423	0.717943	4.01182	3.15126	3.38802	1.68941	0.295978	1.12114	0.956444	1.31698	0.353432
HGF200 X1			5	0	6.527	1.1124	2.45256	1.1681	3.03344	0.595586	-0.0457411	0.652788	-0.138286	-0.14265	0.992116	-0.0232946	0.944088	0.297514	0.0185298	0.0666528	2.07146	0.239714	0.305094	3.72992	4.34122	3.83461	1.73749	2.54213	-0.303157	1.56576	2.70397	0.992258	0.0563223	0.186751	2.2674	2.19388	0.335462	0.279778	3.16868	0.760582	-0.084393	-0.0502216	3.47179	2.28339	0.252986	0.326829	0.0358269	0.519206	1.45447
HGF200+Insulin200 X1200200 X1			5	0	5.98521	1.29864	2.86957	0.720436	3.4875	0.488399	0.0927961	0.686182	-0.218239	-0.0152791	1.52181	-0.0120517	1.129	0.2655	0.222171	0.0219176	1.89217	0.510478	0.707131	3.37457	4.24984	4.49176	2.22792	2.91274	-0.142261	1.68167	3.24842	1.02178	0.120011	0.16651	2.52143	2.91709	0.697199	0.407842	2.2384	0.874828	0.0423019	0.0100007	3.67057	3.56495	0.0991566	0.560854	-0.0668377	0.578348	1.93005
Insulin200 X1			5	0	4.81171	1.12711	2.21113	1.4094	3.20813	0.499007	0.0688837	0.532121	-0.312137	-0.208363	1.25241	0.0262872	1.10901	0.408572	-0.0289209	-0.00360563	1.95503	0.422309	0.333891	3.62942	4.28497	5.08188	1.78077	2.66673	-0.335881	0.0859477	0.809515	1.22074	0.197213	-0.244322	0.831815	2.77331	0.341617	0.313686	2.82308	0.502526	-0.0260936	-0.158705	2.49955	2.92609	-0.0308086	0.268895	0.000585815	0.252071	1.97044
IGF200 X1			5	0	5.66563	0.581421	2.87766	0.89402	1.89115	0.38987	-0.634075	0.218878	-0.361638	-0.120879	0.571263	-0.124866	0.683246	0.136377	1.68148	0.0790099	1.46241	0.128492	0.436823	3.02551	2.73863	17.4751	1.42406	2.6976	-0.485594	0.00449205	0.261761	0.456775	0.304787	-0.108329	0.646317	2.38905	0.0624853	0.436393	2.44372	0.647285	-0.0299314	-0.117651	3.72734	2.13206	0.37775	0.188327	0.0290222	0.536176	1.45181
Media X2			5	0	1.44088	0.020549	0.222469	0.48643	0	0.421183	-0.0175523	0.0982983	0.441518	-0.38776	0.854356	1.2412	-0.434975	-0.456181	-0.0250184	0.146658	0.0415641	-0.0421149	0.217931	0.578273	0.432811	0.316422	-0.1167	-0.0603777	0.258793	1.18248	2.33465	0.733541	0.245062	-0.0504075	0.974146	0.0457031	0	0.0399488	0.310393	0.167306	0.369248	0.118955	0.257285	0	0.14724	-0.076174	0.804289	0.0250891	-0.263089
EGF200 X2			5	0	1.47173	0.292299	0.210399	0.713546	0	0.810256	25.9144	37.9849	7.35855	7.18965	0.799684	1.18366	0.219261	-0.288923	3.25452	0.172423	0.229559	0.18363	2.16726	0.684091	0.803537	0.803065	0.122847	0.430238	1.55436	2.9156	5.73166	1.47299	0.395807	7.03308	2.54776	1.82928	0	1.49607	0.25238	0.94051	3.49789	4.97884	0.343331	0	0.290991	0.0737745	3.2586	3.67913	-0.116289
EGF200 PP2 X2			5	0	0.0600732	0.209927	0.341078	0.232469	0	0.214549	6.02099	6.36307	4.63459	1.86521	0.178951	-0.217703	-0.28771	-0.542993	0.903228	0.152745	0.272132	0.231878	1.23635	0.470841	0.132927	0.51351	0.185231	0.148486	0.631138	0.934364	1.95664	0.115161	0.152788	3.06026	0.550695	0.444019	0	0.218275	0.4944	0.338982	1.75692	1.14821	0.263505	0	0.143246	0.0933066	1.18072	0.939906	-0.0327866
EGF200 U73122 X2			5	0	-0.023942	0.284389	0.136418	0.412893	0	0.481388	12.7518	10.6713	5.49278	3.44364	0.0605052	0.370005	-0.223861	-0.0722725	1.61866	0.17472	0.529563	0.534551	1.49074	0.654336	-0.031919	0.597586	0.356771	0.758401	0.748664	0.30381	1.86189	0.481118	0.361074	4.05946	1.39391	1.71443	0	0.634936	0.345239	0.829326	2.00289	2.02063	0.2897	0	0.111038	0.186617	2.07965	1.52994	0.0383548
EGF200 Wortmannin X2			5	0	-2.62891	0.150976	0.069244	0.406141	0	0.459448	19.9724	26.2392	5.32794	4.00141	-0.338401	-0.342917	0.0443814	-0.176874	2.68635	-0.0407179	0.332146	0.292535	1.13924	0.407611	0.0392539	0.532625	0.0218281	0.677598	1.13088	1.98435	4.98406	0.942682	0.264076	5.31488	-0.334303	1.79807	0	0.769433	0.478345	0.553968	2.63137	3.29007	0.0904974	0	0.00373826	0.0962546	1.9842	2.51574	0.0603534
Media X3			5	0.36159	12.057	1.71437	5.02123	1.5692	6.5207	0.852754	0.848037	0.414172	-0.409793	0.309211	0.260704	0.251532	1.09361	0.683752	0.070231	0.707665	1.56862	0.873902	0.951721	0.747622	2.84597	0.350162	0.276778	1.19446	0	0.578837	2.18492	2.9299	0.891351	0.594545	0.469605	1.31183	1.98201	0.580055	3.50016	1.03693	1.74348	0.308584	9.69306	1.03424	0.205959	0.825636	0.795478	3.41508	2.22416
EGF200 X3			5	0.481907	9.22256	1.79822	4.9399	1.7304	10.8499	1.07793	8.63227	49.3327	7.38756	8.72597	0.597542	0.100456	9.25645	1.90915	5.86465	0.673103	1.76724	0.725399	3.42312	0.546829	2.32328	4.23563	0.243623	3.35467	0	2.79844	4.0564	3.16374	0.915411	12.2112	2.25888	1.86936	22.0531	4.58683	2.98134	3.90399	7.63712	7.63565	11.541	4.07787	0.205123	7.29121	8.77661	9.24669	1.96665
EGF200 Aprotinin X3			5	0.476374	9.71364	1.55068	5.11204	1.63304	11.0542	0.983242	9.06054	62.6329	6.39563	11.0914	0.864079	0.100476	21.5587	2.89394	6.68846	1.0933	2.20427	1.15829	4.43293	0.547916	2.77345	4.76367	0.531179	6.52851	0	2.61289	3.75349	3.58067	0.887385	18.1016	2.4787	2.53635	25.8731	5.90625	2.97719	4.36985	8.2177	10.9277	11.4143	5.31753	0.0961696	7.86253	10.7399	10.2664	1.97969
EGF200 GM6001 X3			5	0.117097	10.6479	1.45382	4.16051	1.82747	11.0406	0.926577	7.23331	49.8743	6.62144	10.117	0.736709	0.108679	18.0436	3.0361	7.17282	1.26722	1.2147	0.636418	3.52412	0.59599	1.85133	2.52408	0.317605	4.44257	0	2.89181	3.61745	4.14936	0.717304	19.9977	2.11187	2.61584	25.2762	5.04669	2.17269	4.17972	6.73473	12.4725	9.29329	3.67578	0.119329	7.84489	9.63393	11.9639	1.47765
EGF200 TAPI-1 X3			5	0.742051	6.73854	1.35568	2.70743	1.33211	7.57976	1.01871	6.18487	33.9547	8.64633	8.96732	0.778694	0.3023	14.2239	2.79577	7.02734	1.25372	1.28071	0.591525	3.04471	0.307818	0.816218	1.60281	0.258089	5.38703	0	1.34712	2.07186	1.58429	0.500608	14.0507	1.48298	2.38677	18.0414	8.05221	1.13141	2.78683	10.886	15.1729	5.09606	2.89563	0.199205	6.43552	7.36623	6.89676	0.812198
Media X4			5	-0.293261	4.89539	2.4881	3.70635	0.233072	0.548863	0.832484	-0.279908	1.22732	0.519927	0.259423	0	0.393444	0.338649	0.282422	0.288798	-0.129184	1.92498	1.1554	0.309827	-0.122235	-0.347366	1.00869	0.202361	0.321198	0.367317	0.970839	3.18362	5.59645	2.73013	0.0781312	0.126387	0.431738	3.01526	0.570681	0.818741	2.02529	-0.0299245	0.849412	5.0795	2.29377	0.571601	0.627796	0.312494	1.90214	0.00287287
EGF200 X4			5	0.0245099	5.70986	3.27416	4.61992	0.411357	1.65982	1.24467	4.11848	23.8036	5.02304	2.64258	0	-0.03718	1.57407	1.58407	0.99662	-0.0610178	3.10146	2.44028	1.42939	-0.107535	0.291928	1.78547	0.532488	2.033	1.43797	2.83784	6.10401	9.57761	3.01295	2.86648	0.532111	3.7455	19.5895	10.3523	1.79797	2.25793	0.987467	5.01825	5.09788	3.73873	2.02315	3.54289	4.78734	12.8192	0.0537731
EGF200 CAPE X4			5	-0.480576	4.63267	2.06726	4.62204	0.959646	1.58164	1.70018	2.05018	15.6453	4.62868	2.3707	0	0.633434	1.22651	0.944066	1.55226	0.00698874	3.00108	1.76631	3.18186	-0.662471	0.462269	1.73645	0.208993	1.71516	1.92309	3.02288	4.9636	7.76636	3.56813	3.77903	0.600297	3.16231	12.0638	10.2358	0.983498	2.1033	1.3696	5.69272	4.36123	3.96235	2.29898	2.08494	5.07347	16.5575	-0.0629517
EGF200 N-Acetylcysteine X4			5	-0.303334	1.17594	1.14654	3.95078	1.29534	1.29749	0.854907	3.57096	23.584	5.44086	2.35316	0	0.944599	1.35843	0.806556	0.260584	-0.474333	1.18578	1.73627	1.85681	-0.0702772	-0.202905	0.963439	0.476714	1.41211	2.36941	6.47999	7.13424	4.03505	3.19495	4.11229	0.484838	3.11094	15.3183	14.6524	1.94582	3.43851	0.854471	9.31364	1.53022	2.74321	3.84736	2.47417	5.75127	24.1597	-0.114719
Media X5			5	0.997503	-0.314865	1.23839	0	-0.100435	1.78638	0.000229836	1.28148	0.960918	0.408471	-0.262584	0.560897	-0.0956132	1.24287	1.12942	-0.0147022	0	1.1385	1.03478	0.147495	0.580878	1.24129	1.25072	0.6944	1.47486	-0.319668	0.772164	3.37851	1.0506	0.259502	0.551286	0.404107	0.91372	2.08053	0.055633	1.46527	-0.660339	-0.214985	0.339462	0.0635116	1.2247	-0.379154	0.815142	0.712722	0.121498	2.35793
EGF200 X5			5	2.03395	0.180749	2.41821	0	0.357615	3.29353	0.470249	11.8225	68.3	10.0509	3.78231	0.254329	0.165926	9.9533	3.13783	5.32333	0	1.38757	0.998841	1.80015	0.388754	2.17317	5.16971	0.653542	6.35365	3.77997	1.77741	7.28587	1.89573	0.611456	7.92414	2.53631	3.64577	24.3737	1.10454	1.90001	0.281539	2.29948	11.78	-0.0713114	3.6718	-0.0585866	8.66046	7.21859	8.52091	2.08628
EGF200 DPI X5			5	3.05025	0.332631	2.82634	0	0.7381	4.71856	1.04077	12.3434	70.8849	10.8307	3.56814	0.682996	0.799252	9.85849	3.49553	8.30153	0	1.45842	1.22459	2.56117	0.467441	2.61587	5.41257	0.848396	8.0315	6.20118	2.71399	8.60987	2.39063	0.57674	9.83164	2.95862	4.10238	27.6905	1.30491	1.97625	0.532096	2.7094	12.8933	0.0665875	3.74839	0.102544	10.292	7.63247	11.3224	2.1447
EGF200 Clostridium Toxin B X5			5	1.10759	0.0289034	1.60714	0	0.0516999	3.23879	0.14092	8.17304	37.995	5.00995	3.2412	-0.623238	0.4944	5.46917	3.53018	4.15384	0	0.893273	0.853337	0.7333	0.511143	1.2276	3.32389	0.729186	6.45558	3.725	1.12162	5.79671	0.183537	0.408168	7.02275	2.32989	1.72971	26.9691	0.904661	1.37337	0.0555018	1.49783	6.25625	-0.333608	2.48159	-0.275934	9.5733	5.5765	6.78363	1.6096
EGF200 PHPS2 X5			5	1.25069	0.73128	1.93642	0	0.382638	3.54758	0.368607	10.0343	68.9224	5.87423	3.71649	1.05978	0.842522	9.11587	2.71294	8.90312	0	0.474447	0.798133	1.1981	0.222003	1.82296	3.82395	0.594086	6.90937	4.83723	1.72135	6.04805	1.21215	1.17446	9.02475	1.66924	2.85845	18.2421	1.7306	1.3667	0.316954	2.20638	10.4171	-0.145492	2.71513	-0.129952	7.81749	8.37718	13.2886	0.857263
Media X6			5	0.752021	3.85708	0.722278	12.5015	2.43297	1.18919	1.37312	0.386674	0.723889	0.828667	0.956187	0	0.400554	1.85639	0.112472	1.39625	-0.168487	2.17039	1.16313	0.25218	0.815855	0.735016	0.536507	0.273751	-0.548347	0.0377804	0.766812	0.757388	4.42288	-0.221414	0.711376	-0.0188972	1.03343	0.49089	0.434288	1.97863	1.45409	-0.103297	0.579737	3.62607	1.79482	0.122193	1.99291	0.376501	1.20825	1.68123
EGF200 X6			5	1.9488	5.10938	1.53335	11.4484	3.40716	3.58204	2.38611	10.4847	60.5223	6.09445	6.15854	0	0.351727	10.2012	3.50525	9.32984	-0.337411	3.96622	3.64651	1.9441	1.37835	1.9531	2.49172	1.5262	2.87429	5.1564	4.51631	4.75869	10.2525	-0.391708	12.0182	1.29606	2.17886	8.26788	7.05062	2.57839	2.78121	8.47201	18.6998	4.49787	3.72236	0.0422265	18.0049	3.89881	6.96976	2.50755
EGF200 DPI X6			5	1.70579	5.41036	1.0566	13.131	3.03543	3.11179	2.17523	11.4208	55.9037	7.34584	5.28984	0	-0.0904854	11.3751	3.77437	9.64058	0.0641915	6.3783	3.13587	2.00206	1.55651	1.63759	2.75717	1.95666	3.72864	6.25346	3.83368	3.88737	10.1311	-0.106212	11.5956	0.974215	2.40903	7.37737	6.09784	3.17953	3.30227	7.51353	15.8671	6.3546	3.71039	0.19386	18.5573	3.74158	5.01363	2.54701
EGF200 PP2 X6			5	1.37384	3.11166	0.876922	8.62986	3.38549	2.1729	2.21026	7.14736	36.2791	4.93808	3.3794	0	0.456548	6.51327	1.825	5.45879	-0.504541	4.46142	1.81575	1.4619	1.65686	1.23331	1.43198	0.975386	1.34572	2.19998	2.67363	3.22596	3.89815	-0.241269	8.15904	0.232694	1.38224	3.56074	3.47166	2.52283	1.55118	4.1962	9.96549	2.26708	2.80711	0.110786	10.908	2.0051	3.69457	2.06758
EGF200 EMBPTP1BI X6			5	1.47358	4.50127	1.05327	12.5748	3.59547	3.04771	2.52458	8.4439	54.7281	9.00859	4.65494	0	0.344631	11.5144	3.02568	9.93522	-0.0990329	5.561	2.93758	1.99495	1.40337	1.15181	1.77013	1.53222	3.63521	6.2599	4.45333	3.57632	10.5646	-0.284811	11.7684	0.547196	1.85055	7.7426	7.12684	2.78335	3.21168	7.71297	15.35	3.4734	2.9436	0.177516	14.7801	4.78232	6.51627	2.20692
Media X1			15	0	1.87044	0.50344	1.59167	-0.324509	0.960105	0.0573597	0.0413536	0.439967	0.256081	0.130797	0.548352	-0.308607	0.641372	0.29607	0.241308	-0.161011	0.758918	0.113208	0.73472	1.79803	1.54128	3.75384	1.33713	2.55834	-0.211707	-2.0317	-1.38279	-0.795246	0.306217	0.313575	0.690798	2.32049	0.0810493	0.388262	1.6386	0.205647	0.25438	0.102673	2.1302	2.27444	0.228897	0.197612	-0.115092	0.613253	0.684843
EGF200 X1			15	0	2.64899	0.29755	2.03216	0.52256	1.82383	0.167618	3.5045	9.2902	4.98682	3.91763	-0.148537	-0.821099	0.854582	0.254823	1.48829	-0.263749	0.71988	0.0704764	0.682115	0.920117	1.37575	3.3001	1.44345	2.97014	0.507143	-0.233241	0.293569	0.376754	0.478253	4.39508	0.767932	2.41463	2.11965	1.58248	1.40341	0.485264	3.00143	2.52841	3.00095	1.77942	0.366128	0.559061	0.486669	1.19367	0.232764
EGF200+Insulin200 X1200200 X1			15	0	4.80011	0.367226	2.82922	1.08197	2.4837	0.670935	5.47592	19.8146	8.21713	7.68786	0.104838	-0.252978	1.04899	0.419787	3.11435	0.0214902	0.92527	0.147189	1.99684	1.45987	1.21904	3.82747	1.46916	3.08805	0.972672	0.348508	0.527284	0.654132	0.765476	9.4331	1.63655	2.51289	3.86282	3.42208	1.0249	1.0165	6.06847	6.5757	4.4692	1.66897	0.868882	1.05246	1.60708	1.87576	0.408144
HGF200 X1			15	0	6.04299	0.0638377	3.09967	0.80062	1.19294	0.481011	-1.78764	-0.0582295	-0.43141	0.0591821	0.205763	-0.201544	0.14828	-0.1535	0.412503	0.00193934	0.629732	-0.389419	1.94244	1.72832	1.79654	2.92045	0.615926	1.89018	-0.12375	0.609425	0.683806	-0.0781006	0.317803	0.34229	1.01088	1.40717	-0.460522	0.882639	1.2525	1.00342	0.15895	0.045783	4.16944	1.18498	0.66691	-0.517137	0.20754	1.26178	0.418756
HGF200+Insulin200 X1200200 X1			15	0	5.67027	0.391396	2.45594	1.70611	1.17976	0.814638	-0.690549	0.208465	0.222723	-0.0836799	1.10287	0.36916	0.262825	-0.25272	0.118331	-0.165462	0.677905	-0.189631	0.942812	4.33082	2.2769	3.16253	0.428004	1.04904	-0.35268	0.701053	1.08476	0.0879249	0.184541	0.335079	0.825444	1.86157	-0.430167	0.525823	1.16564	0.601594	0.0782463	-0.145576	2.0946	1.10384	0.565161	-0.415653	0.143082	0.672292	0.546807
Insulin200 X1			15	0	3.37149	0.0879581	2.27864	0.36228	0.850497	0.2834	-0.726032	0.100466	0.01363	-0.147536	0.710496	0.0188758	0.170667	-0.0586126	0.24577	-0.373494	0.691536	-0.396897	0.669184	3.47708	1.42555	3.38672	0.675529	1.37933	-0.680023	-2.3224	-2.55667	-0.683233	-0.06395	0.0489557	0.349656	1.7091	-0.26026	0.584905	1.46421	0.658173	-0.0479759	-0.293161	2.68476	1.54633	1.00221	-0.313252	-0.0361226	0.607212	0.841657
IGF200 X1			15	0	7.25621	0.494537	3.61644	0.247944	2.04041	0.530947	-0.455888	0.561859	-0.0330522	-0.0132346	0.967592	0.120493	0.45256	0.321581	1.49616	0.0676432	1.47001	0.182668	0.782797	4.29896	2.66588	17.5661	1.40225	1.39187	-0.46365	-1.10737	-0.713015	0.0219885	-0.00210759	0.204612	0.983176	2.54139	0.187489	0.885221	2.05719	0.835524	0.0720873	-0.016442	3.42733	2.90217	0.607859	0.0980629	0.143924	0.80139	1.58643
Media X2			15	0	1.21448	-0.41107	0.323855	0.0183662	0	-0.0362022	0.427296	0.164332	0.340159	0.0124473	0.35274	1.10748	-0.469718	-0.0728517	0.0572707	-0.138158	0.774652	0.298376	0.480829	0.933603	0.167196	0.00283477	0.0261642	0.211366	0.0677411	-0.228105	0.35211	0.117007	-0.182354	0.1255	3.45077	0.0983964	0	-0.0394458	0.363504	0.0318249	0.0675446	-0.0977324	0.250037	0	0.155166	0.0201018	0.477727	0.0978174	0.545383
EGF200 X2			15	0	3.11723	1.09378	0.486607	0.343323	0	0.370024	32.1111	54.5574	7.22696	6.82542	0.369729	1.61486	0.470462	0.462843	4.08367	0.0570793	1.7059	1.48257	2.34659	1.7082	1.00192	1.6516	0.338236	1.14786	1.63186	0.632441	2.8753	1.09551	0.134593	7.9121	9.49514	4.55882	0	2.13699	0.405594	0.557218	3.34078	4.96613	0.598805	0	0.451822	0.396496	2.70075	4.10343	1.23464
EGF200 PP2 X2			15	0	0.641076	-0.0228177	0.290452	9.05774e-05	0	-0.0352636	11.8944	8.94378	4.96288	1.39071	-0.138845	-0.174865	-0.611625	-0.252943	0.826517	-0.0545899	0.678325	0.507631	1.3218	0.557737	0.0688047	0.290966	0.0686475	0.0149388	0.395808	0.333762	1.49532	-0.128425	-0.146414	2.45336	6.53816	0.118826	0	0.115872	0.285723	-0.156325	1.14336	0.756796	0.105402	0	0.344145	-0.0797169	0.747809	0.699106	0.628411
EGF200 U73122 X2			15	0	0.910927	0.301396	0.151305	0.398272	0	0.305381	12.9577	14.2431	5.80478	2.84125	0.342012	0.410589	-0.0782061	-0.0336835	1.63397	0.02032	0.914074	0.722917	1.34021	0.897154	0.352038	0.640294	0.278369	0.304257	0.53235	0.226041	1.37459	1.78764	0.332924	3.69471	9.31926	1.14047	0	0.62276	0.583039	0.178938	1.68867	1.70941	0.112384	0	0.299981	0.0616312	1.47084	1.41103	0.629776
EGF200 Wortmannin X2			15	0	-1.55183	0.636279	0.249245	0.122621	0	0.133767	17.1295	19.0707	5.18033	2.99133	-0.678097	-0.761625	-0.149309	-0.118501	1.69155	0.0395956	0.476692	0.964627	1.13868	0.580949	-0.372	0.648566	0.322289	0.253982	0.527352	0.0942495	0.776047	2.78505	0.391569	4.07197	12.6056	1.35214	0	0.561618	0.428174	0.165877	1.59284	1.95619	0.181629	0	0.233295	0.106212	1.33204	1.41954	0.761843
Media X3			15	1.01347	17.0268	1.29025	6.33854	0.502297	6.40575	0.558082	1.32494	0.937915	1.20721	0.111442	1.00842	0.383248	7.97497	1.51006	0.521689	1.20502	1.31265	1.00879	0.538986	0.653084	0.90588	0.344584	0.829671	1.38637	0	-0.263685	0.541904	1.72573	0.835334	1.47666	0.38929	2.21307	2.17133	1.01782	1.04317	1.67549	1.26007	0.943729	17.2875	1.35965	0.00504202	1.86042	1.61719	2.56722	2.12267
EGF200 X3			15	0.872387	14.6693	1.2874	4.33033	2.59568	5.53875	1.4313	7.57255	30.4283	12.2955	9.46503	0.990548	0.383846	13.9025	3.44569	6.44376	1.01328	1.68393	1.08229	1.98868	0.99798	0.594001	1.24494	0.750168	6.59884	0	0.938091	1.46593	3.24173	0.688114	12.8933	2.23247	2.42061	17.8283	7.75852	-0.580368	3.34161	11.4877	14.4691	7.87023	1.94733	0.0581163	10.4064	8.13629	9.08749	1.9959
EGF200 Aprotinin X3			15	1.13924	12.591	1.88184	3.72712	2.53034	6.00082	0.968626	9.62788	39.5476	8.83251	8.15619	1.37108	0.18607	13.9457	4.8835	6.36852	0.763621	2.65564	1.73692	1.45033	0.701166	1.65023	2.58146	1.12706	9.30789	0	0.4057	1.20332	4.22155	0.410926	11.0059	2.90624	2.75001	20.1148	5.07717	-5.09905	2.78351	6.47723	12.5097	7.85399	2.26126	-0.0996999	11.9482	7.1808	8.06429	2.35154
EGF200 GM6001 X3			15	0.736131	13.074	1.83916	4.79637	2.68042	7.44462	1.08001	9.50902	36.3378	7.30349	8.23779	1.04121	0.17363	13.5755	3.74194	8.26811	0.749306	2.14618	1.32595	1.74939	0.500371	1.45723	3.22017	0.60644	7.7852	0	0.665683	1.03861	4.77761	0.46663	14.6373	2.95384	1.80263	16.6688	6.70462	-1.71453	4.12067	7.21789	11.1179	12.7998	2.57664	-0.0999568	10.0358	8.1636	10.9338	2.05237
EGF200 TAPI-1 X3			15	0.906469	11.1548	1.40941	3.70736	2.35293	7.29667	1.44129	9.62267	39.2103	8.01685	6.55906	1.30363	0.227752	12.4339	2.97272	8.31348	0.768975	2.26616	1.7251	2.24749	0.239871	1.42644	5.34798	0.667176	5.9069	0	1.68857	0.949208	3.46671	0.440555	9.34128	2.44427	1.74941	8.68784	4.59737	-0.129562	2.85582	6.083	11.0246	9.35328	2.63849	-0.224942	7.69476	5.51475	7.52792	1.51009
Media X4			15	-1.2273	12.272	0.462388	4.05998	0.847859	0.601416	1.24269	-0.921091	1.91354	1.42526	0.37902	0	1.50428	0.187198	-0.288455	0.0313698	1.32799	1.4826	0.549338	1.78576	-0.648705	-0.372046	1.27773	-0.0888331	0.210663	0.947162	1.0324	0.829794	3.27137	4.21534	0.622626	-0.11222	0.0637529	0.912231	1.35875	1.13109	2.59588	0.00865399	1.15946	10.6522	2.54493	0.758605	-1.05634	3.04738	14.9805	-0.385874
EGF200 X4			15	-1.1066	9.11254	0.994388	1.91312	2.09925	0.400262	1.31992	1.41021	12.3937	3.0507	1.62257	0	0.97987	0.481518	0.0171276	1.00956	0.970048	1.30581	0.607328	2.21985	-1.09428	-0.17557	1.28434	-0.067337	0.848516	1.68163	2.33166	2.29154	4.75962	6.00175	3.09837	-0.0635742	1.22449	6.37935	10.2757	0.400611	2.04746	2.98466	6.59875	8.33232	2.01546	1.6226	0.807532	5.55453	21.8728	-0.846924
EGF200 CAPE X4			15	-0.700598	5.83516	1.27881	1.59365	2.24119	0.767444	1.53105	2.01817	13.2539	2.62268	1.39022	0	0.723847	0.674618	0.255853	1.29029	0.655472	2.18353	1.10872	2.77885	-0.841761	-0.305087	2.1578	0.543978	1.39466	1.28538	1.50067	2.79256	6.77293	4.15024	3.28615	0.0933288	1.89633	7.27197	7.38422	0.805548	1.24452	2.48888	5.36174	5.24658	3.81035	1.42524	1.10436	4.6372	18.2522	-0.401495
EGF200 N-Acetylcysteine X4			15	-0.583026	4.63186	1.12467	5.65222	1.88129	0.408675	0.478628	2.46132	16.2176	2.47707	1.40267	0	0.386951	0.865015	-0.402633	0.720553	0.412878	1.78829	1.58974	1.56572	-0.238765	0.477778	1.56192	0.710285	0.657765	0.778274	5.60398	4.80007	7.83132	5.43677	2.18106	0.279283	2.50169	7.11773	6.05384	1.58804	0.971396	1.94432	4.6671	5.02222	3.64745	3.06541	1.22049	4.17585	10.4318	0.229431
Media X5			15	1.40718	0.14767	1.67605	0	-0.00717973	2.39688	-0.185602	1.86889	2.72959	0.148818	0.705911	0.770906	0.879241	1.83174	1.50853	0.68943	0	0.660681	1.03219	0.116813	0.541333	1.23016	2.19098	1.30364	1.55735	0.316358	-0.613712	1.03924	0.926844	0.0678355	0.991001	0.249323	1.38613	2.01164	0.113395	2.00547	-0.242826	-0.0234651	0.64767	-0.334208	2.3475	-0.282902	1.93935	1.16911	0.998652	2.19004
EGF200 X5			15	2.18861	-0.166651	3.60569	0	-0.00145593	4.94619	0.129758	16.874	99.8398	4.95165	2.8335	2.71418	0.612981	10.8787	3.27899	7.85632	0	0.518718	1.08636	1.91903	0.957505	2.06837	4.98233	0.855656	8.55925	4.57554	-0.0976299	4.46687	2.59835	0.305594	7.07731	2.37091	4.38192	19.4028	1.75901	1.53045	0.141998	2.04311	12.3648	-1.32327	2.79089	-0.496818	12.0904	4.97581	12.7169	2.04882
EGF200 DPI X5			15	1.91788	0.282767	3.1799	0	0.359651	4.18251	0.599572	17.9619	89.2854	6.81924	3.56578	3.2729	1.0869	9.11394	4.71441	8.97013	0	1.20256	1.50967	2.17183	0.562745	2.29613	4.66619	1.15802	10.8329	6.18357	0.443197	5.59466	1.49921	0.976866	8.34278	2.83135	5.56273	18.6125	2.02245	1.14833	0.198032	2.45036	13.3449	-0.677067	2.54944	0.0390641	12.3861	5.52221	13.213	2.24302
EGF200 Clostridium Toxin B X5			15	1.33469	0.357518	2.16275	0	-0.150339	2.56452	-0.0108965	11.8783	71.2417	3.91742	2.29558	1.46744	0.608288	6.30216	4.21601	5.34692	0	1.25705	1.68188	1.10369	0.555592	1.7653	3.48055	0.800187	10.0221	3.50816	0.090234	4.63522	0.439958	0.191752	5.73442	3.35011	4.47879	16.7732	1.54718	1.00988	-0.0387774	1.50252	8.37825	-0.764977	1.92556	-0.161984	12.6272	3.98076	10.6576	2.22757
EGF200 PHPS2 X5			15	1.94432	0.969796	4.15569	0	0.129453	5.96252	0.361625	20.0717	130.215	10.2857	4.70029	5.73342	1.99697	12.6631	3.46493	15.1998	0	1.25701	1.92485	3.4485	0.283112	2.9918	6.93093	0.841856	7.18942	9.01739	1.0552	7.35463	1.65342	1.24535	12.646	2.81309	7.34427	9.2659	3.67755	2.01886	0.605923	3.82947	18.6183	-0.308152	4.61134	0.154165	10.0509	7.53546	20.9949	1.78546
Media X6			15	0.594188	3.28023	0.462216	9.35608	1.72388	1.01824	1.26926	0.384544	1.32024	1.13439	0.443044	0	0.274858	4.90533	-0.143717	1.53384	-0.0478447	2.14528	0.754602	0.251395	0.770117	0.4169	0.336956	0.192618	0.23182	0.112875	-0.00827416	-0.174779	4.66396	-1.10224	1.00442	-0.148741	0.674851	0.578585	2.27063	2.40351	1.93943	0.18409	0.409375	1.75723	1.51727	0.215199	2.00687	1.0718	1.14073	1.33454
EGF200 X6			15	0.922135	6.50292	0.871944	9.90025	4.38508	3.12553	3.26486	7.5302	47.576	8.01621	3.84153	0	0.33127	9.96515	1.65946	8.86386	0.124897	3.06558	1.93289	2.24914	1.16511	2.05678	1.50016	1.18135	2.28349	6.9425	1.90144	2.30207	7.05156	-0.185445	11.8638	0.450686	1.53608	6.05411	5.66479	2.28318	3.85912	7.12212	15.5095	3.10075	2.22377	0.278374	11.8634	5.66137	6.29148	1.67432
EGF200 DPI X6			15	0.719322	5.01672	0.860391	10.8464	3.68861	2.53122	2.44102	6.20303	33.5557	4.35152	3.38816	0	0.014857	8.56645	1.12191	6.37437	0.109382	3.73473	1.25366	1.99613	0.859479	2.08932	1.17261	1.12598	1.73397	4.66163	2.06049	1.51664	11.5552	0.396783	9.3282	0.276642	0.962699	4.16318	4.64891	1.7779	3.68703	5.81876	11.4625	4.72837	1.83202	0.203365	9.37009	4.94552	6.02617	1.48216
EGF200 PP2 X6			15	0.67729	2.21315	0.885601	9.57019	1.78053	1.19264	1.23255	4.78313	22.2018	5.15352	2.12514	0	-0.159732	5.0598	0.433451	3.87749	-0.128701	2.26022	0.884863	1.04155	0.370388	1.80975	1.31279	0.834032	0.836329	2.4675	0.888493	1.31978	2.25236	-0.353263	5.07926	0.978872	0.604184	2.30117	2.52157	1.98302	1.90159	3.29549	6.56437	3.39061	0.841441	0.056134	6.09944	1.50284	3.28813	1.09235
EGF200 EMBPTP1BI X6			15	0.449754	1.80204	0.782843	8.5619	1.30772	1.52151	1.02605	5.94666	24.5554	6.07616	2.29719	0	-0.579809	4.18367	0.835165	4.83299	-0.640888	1.85692	1.20387	0.578195	0.163032	1.46893	1.43229	0.852757	1.34036	2.54679	0.617367	0.800486	4.10798	-0.0347176	5.24614	1.17617	0.621536	4.68728	3.05103	1.40247	1.35015	3.99135	8.3538	2.89536	0.793426	-0.408957	6.49357	1.99332	4.18042	0.63357
[truncated: 92 more columns]
