# Supplementary material for: The DIONESUS algorithm provides scalable and accurate reconstruction of dynamic phosphoproteomic networks to reveal new drug targets
Source: Royal Society of Chemistry journal article supplement (doi:10.1039/c5ib00065c), 2015-01-01
Supplement: c5ib00065c13.xlsx [file c5ib00065c13.xlsx]

## Sheet: x150130_Input_GENIE3_prediction
Supplementary Table 8. Edge list (GENIE3)
Parent	Daughter	Scoring Metric (Edge Confidence)
p-STAT5(Y694)	p-KIT(C-)(Y719)	0.170024
p-KIT(C-)(Y719)	p-STAT5(Y694)	0.168955
p-AKT(S473)	p-PKCPAN/G(T514)	0.150271
p-PKCPAN/G(T514)	p-AKT(S473)	0.147068
p-AKT(S473)	p-S6RIBPROT(S240/244)	0.14094
p-SRC(Y527)	p-SAPK/JNK(T183/Y185)	0.136845
p-RAF(C-)(S338)	p-RAF(C-)(S259)	0.130995
p-FGFR1(Y653/654)	p-STAT3(Y705)	0.130844
p-EGFR(Y1068)	p-EGFR(Y1173)	0.126977
p-PYK2(Y402)	p-SHP2(Y542)	0.123318
p-ERBB4(Y1284)	p-JAK1(Y1022/1023)	0.123002
p-CRKL(Y207)	p-PI3KP85(Y458)P55(Y199)	0.122262
p-S6RIBPROT(S240/244)	p-PKCPAN/G(T514)	0.120645
p-AKT(S473)	p-P90RSK(S380)	0.119626
p-STAT3(Y705)	p-ERBB4(Y1284)	0.119365
p-EGFR(Y845)	p-EGFR(Y1173)	0.119309
p-FGFR1(Y653/654)	p-MET(Y1234/1235)	0.118921
p-FAK(Y576/577)	p-STAT3(Y705)	0.118634
p-STAT1(Y701)	p-PDFGRA(Y849)/PDGFRB(Y857)	0.118065
p-STAT6(Y641)	p-PLCG2(Y759)	0.116529
p-CRKII(Y221)	p-RAF(C-)(S338)	0.115717
p-FAK(Y576/577)	p-STAT6(Y641)	0.115097
p-ERBB2(Y1221/1222)	p-SYK(Y525/526)	0.114481
p-STAT1(Y701)	p-PYK2(Y402)	0.114344
p-RAF(C-)(S259)	p-RAF(C-)(S338)	0.114276
p-CRKL(Y207)	p-CREB(S133)	0.113855
p-PI3KP85(Y458)P55(Y199)	p-CRKL(Y207)	0.113289
p-PKCPAN/G(T514)	p-S6RIBPROT(S240/244)	0.113107
p-FAK(Y576/577)	p-FGFR1(Y653/654)	0.111051
p-SRC(Y527)	p-PTEN(S380)	0.109251
p-CREB(S133)	p-CRKL(Y207)	0.10922
p-FGFR1(Y653/654)	p-FAK(Y576/577)	0.108177
p-S6RIBPROT(S240/244)	p-AKT(S473)	0.108035
p-MET(Y1234/1235)	p-EGFR(Y845)	0.107054
p-SHP2(Y542)	p-PYK2(Y402)	0.106604
p-PDFGRA(Y849)/PDGFRB(Y857)	p-CDC2(Y15)	0.104426
p-STAT3(Y705)	p-ZAP70(Y319)/SYK(Y352)	0.104247
p-SYK(Y525/526)	p-EGFR(Y1086)	0.10421
p-MET(Y1234/1235)	p-PLCG1(Y783)	0.103879
p-EGFR(Y1173)	p-EGFR(Y845)	0.1038
p-MET(Y1234/1235)	p-EGFR(Y1173)	0.103611
p-SAPK/JNK(T183/Y185)	p-PTEN(S380)	0.102928
p-PKCPAN/G(T514)	p-CDK2(T160)	0.102887
p-JAK1(Y1022/1023)	p-ZAP70(Y319)/SYK(Y352)	0.102238
p-SAPK/JNK(T183/Y185)	p-SRC(Y527)	0.101571
p-PDGFRB(Y1009)	p-PI3KP85(Y458)P55(Y199)	0.100757
p-ERK1/2(T202/Y204)	p-MEK(1/2)(S217/221)	0.099425
p-STAT3(Y705)	p-FGFR1(Y653/654)	0.098856
p-EGFR(Y845)	p-PLCG1(Y783)	0.098631
p-PDFGRA(Y849)/PDGFRB(Y857)	p-PYK2(Y402)	0.098289
p-PLCG2(Y759)	p-STAT6(Y641)	0.097773
p-SYK(Y525/526)	p-ERBB2(Y1221/1222)	0.097697
p-CDK2(T160)	p-PKCPAN/G(T514)	0.097273
p-ABL(C-)(Y245)	p-RAF(C-)(S259)	0.096918
p-STAT1(Y701)	p-JAK1(Y1022/1023)	0.096184
p-STAT3(Y705)	p-FAK(Y576/577)	0.095855
p-SHC(Y239/240)	p-PTEN(S380)	0.095052
p-CRKL(Y207)	p-FOXO3A(S253)	0.094968
p-SYK(Y525/526)	p-FGFR1(Y653/654)	0.094282
p-FOXO1(S319)/FOXO4(S262)	p-AKT(S473)	0.093777
p-AKT(S473)	p-FOXO1(S319)/FOXO4(S262)	0.092554
p-EGFR(Y1086)	p-EGFR(Y1173)	0.092436
p-ABL(C-)(Y245)	p-SAPK/JNK(T183/Y185)	0.092351
p-GSK3A(S21)	p-RAF(C-)(S338)	0.09199
p-ERBB4(Y1284)	p-STAT3(Y705)	0.091913
p-JAK1(Y1022/1023)	p-STAT1(Y701)	0.090883
p-PKCPAN/G(T514)	p-FOXO1(S319)/FOXO4(S262)	0.090798
p-SRC(Y416)	p-EGFR(Y1068)	0.090756
p-ZAP70(Y319)/SYK(Y352)	p-PDGFRA(Y754)	0.090704
p-PYK2(Y402)	p-GAB1(Y627)	0.090629
p-ERBB2(Y1221/1222)	p-ABL(C-)(Y245)	0.089912
p-STAT6(Y641)	p-ERK1/2(T202/Y204)	0.089011
p-PI3KP85(Y458)P55(Y199)	p-PDGFRB(Y1009)	0.089
p-STAT3(Y705)	p-JAK1(Y1022/1023)	0.088133
p-CRKII(Y221)	p-GSK3A(S21)	0.087905
p-PTEN(S380)	p-SHC(Y239/240)	0.087601
p-STAT3(Y705)	p-SYK(Y525/526)	0.087315
p-FGFR1(Y653/654)	p-ERBB2(Y1221/1222)	0.087154
p-SYK(Y525/526)	p-MET(Y1234/1235)	0.087142
p-S6RIBPROT(S240/244)	p-PI3KP85(Y458)P55(Y199)	0.086579
p-STAT6(Y641)	p-FAK(Y576/577)	0.086323
p-GSK3A(S21)	p-IRS1(S1101)	0.086121
p-FAK(Y576/577)	p-ERBB4(Y1284)	0.085845
p-FGFR1(Y653/654)	p-EGFR(Y1086)	0.08562
p-FOXO3A(S253)	p-CRKL(Y207)	0.085474
p-PTEN(S380)	p-SAPK/JNK(T183/Y185)	0.08547
p-SHP2(Y542)	p-PDFGRA(Y849)/PDGFRB(Y857)	0.085101
p-PDFGRA(Y849)/PDGFRB(Y857)	p-PLCG2(Y759)	0.084474
p-FAK(Y576/577)	p-ERBB2(Y1221/1222)	0.084214
p-FAK(Y576/577)	p-MTOR(S2448)	0.084001
p-PI3KP85(Y458)P55(Y199)	p-S6RIBPROT(S240/244)	0.083953
p-EGFR(Y845)	p-MET(Y1234/1235)	0.083629
p-CRKII(Y221)	p-FOXO1(S319)/FOXO4(S262)	0.083629
p-GAB2(S159)	p-SAPK/JNK(T183/Y185)	0.083595
p-GAB2(S159)	p-SRC(Y527)	0.08289
p-EGFR(Y1086)	p-SYK(Y525/526)	0.082547
p-PDFGRA(Y849)/PDGFRB(Y857)	p-SHP2(Y542)	0.082534
p-ERBB2(Y1221/1222)	p-CRKII(Y221)	0.081824
p-PYK2(Y402)	p-PDFGRA(Y849)/PDGFRB(Y857)	0.081199
p-PKCD(T505)	p-P90RSK(S380)	0.080522
p-FGFR1(Y653/654)	p-PLCG2(Y759)	0.079993
p-ZAP70(Y319)/SYK(Y352)	p-IRS1(S1101)	0.079931
p-SYK(Y525/526)	p-FAK(Y576/577)	0.079866
p-EGFR(Y1086)	p-SRC(Y416)	0.079713
p-GSK3A(S21)	p-RAF(C-)(S259)	0.079274
p-STAT1(Y701)	p-STAT5(Y694)	0.079259
p-STAT6(Y641)	p-ERBB4(Y1284)	0.078591
p-ERBB2(Y1221/1222)	p-ERBB4(Y1284)	0.078524
p-JAK1(Y1022/1023)	p-PKCD(T505)	0.078385
p-EGFR(Y1086)	p-MET(Y1234/1235)	0.078299
p-STAT3(Y705)	p-MET(Y1234/1235)	0.078054
p-FOXO1(S319)/FOXO4(S262)	p-PKCPAN/G(T514)	0.078033
p-CDK2(T160)	p-S6RIBPROT(S240/244)	0.077485
p-ERBB4(Y1284)	p-ZAP70(Y319)/SYK(Y352)	0.077428
p-JAK1(Y1022/1023)	p-PDGFRA(Y754)	0.077269
p-MEK(1/2)(S217/221)	p-ERK1/2(T202/Y204)	0.07714
p-SYK(Y525/526)	p-SRC(Y416)	0.07632
p-PI3KP85(Y458)P55(Y199)	p-CREB(S133)	0.076291
p-CREB(S133)	p-P70S6K(T421/S424)	0.076145
p-FOXO3A(S253)	p-P38MAPK(T180/Y182)	0.075951
p-ERBB2(Y1221/1222)	p-FAK(Y576/577)	0.075613
p-STAT3(Y705)	p-EGFR(Y1086)	0.075493
p-STAT3(Y705)	p-STAT6(Y641)	0.074833
p-PLCG2(Y759)	p-ERBB2(Y1221/1222)	0.074767
p-ERBB4(Y1284)	p-FAK(Y576/577)	0.074666
p-CDK2(T160)	p-AKT(S473)	0.074526
p-SRC(Y527)	p-CDK2(T160)	0.074161
p-IGF1RB(Y1135/1136)/INSRB	p-GSK3A(S21)	0.07368
p-FAK(Y576/577)	p-PLCG2(Y759)	0.073557
p-SYK(Y525/526)	p-PLCG1(Y783)	0.073259
p-FGFR1(Y653/654)	p-ERBB4(Y1284)	0.073149
p-EGFR(Y1086)	p-FGFR1(Y653/654)	0.072966
p-EGFR(Y1086)	p-4EBP1(S65)	0.072884
p-PDFGRA(Y849)/PDGFRB(Y857)	p-STAT6(Y641)	0.072802
p-JAK1(Y1022/1023)	p-IRS1(S1101)	0.072693
p-STAT6(Y641)	p-MTOR(S2448)	0.072484
p-P38MAPK(T180/Y182)	p-FOXO3A(S253)	0.071535
p-PKCPAN/G(T514)	p-P70S6K(T421/S424)	0.071518
p-STAT3(Y705)	p-ERBB2(Y1221/1222)	0.071439
p-PLCG1(Y783)	p-EGFR(Y845)	0.071407
p-PLCG2(Y759)	p-SYK(Y525/526)	0.071247
p-PTEN(S380)	p-SRC(Y527)	0.070855
p-ERBB4(Y1284)	p-STAT6(Y641)	0.070826
p-SRC(Y527)	p-SHC(Y239/240)	0.070756
p-STAT6(Y641)	p-SHP2(Y542)	0.070412
p-AKT(S473)	p-CDK2(T160)	0.070328
p-ZAP70(Y319)/SYK(Y352)	p-PKCD(T505)	0.070274
p-MTOR(S2448)	p-CDC2(Y15)	0.069941
p-P90RSK(S380)	p-AKT(S473)	0.069848
p-FAK(Y576/577)	p-ABL(C-)(Y245)	0.069824
p-GSK3A(S21)	p-IGF1RB(Y1135/1136)/INSRB	0.069616
p-ERBB4(Y1284)	p-ERBB2(Y1221/1222)	0.069347
p-RAF(C-)(S338)	p-GSK3A(S21)	0.068843
p-PDFGRA(Y849)/PDGFRB(Y857)	p-STAT1(Y701)	0.068686
p-EGFR(Y1068)	p-MET(Y1349)	0.068619
p-EGFR(Y1086)	p-EGFR(Y1068)	0.068576
p-EGFR(Y1173)	p-PLCG1(Y783)	0.068431
p-EGFR(Y1086)	p-KIT(C-)(Y719)	0.068319
p-ERBB2(Y1221/1222)	p-RAF(C-)(S259)	0.067927
p-P38MAPK(T180/Y182)	p-PI3KP85(Y458)P55(Y199)	0.067816
p-PDFGRA(Y849)/PDGFRB(Y857)	p-PDGFRB(Y1009)	0.067595
p-PYK2(Y402)	p-SRC(Y416)	0.067595
p-FGFR1(Y653/654)	p-KIT(C-)(Y719)	0.06723
p-SYK(Y525/526)	p-GAB1(Y627)	0.06721
p-SHC(Y239/240)	p-SRC(Y527)	0.066959
p-EGFR(Y845)	p-EGFR(Y1068)	0.066857
p-STAT6(Y641)	p-PYK2(Y402)	0.066787
p-MTOR(S2448)	p-FOXO3A(S253)	0.066705
p-MET(Y1234/1235)	p-FGFR1(Y653/654)	0.066456
p-ERBB4(Y1284)	p-PDFGRA(Y849)/PDGFRB(Y857)	0.066447
p-EGFR(Y1068)	p-EGFR(Y845)	0.066417
p-FGFR1(Y653/654)	p-SYK(Y525/526)	0.065598
p-JAK1(Y1022/1023)	p-ERBB4(Y1284)	0.065538
p-MET(Y1234/1235)	p-SYK(Y525/526)	0.065321
p-EGFR(Y1086)	p-GAB1(Y627)	0.065295
p-SRC(Y416)	p-GAB1(Y627)	0.065241
p-ZAP70(Y319)/SYK(Y352)	p-JAK1(Y1022/1023)	0.064931
p-PDFGRA(Y849)/PDGFRB(Y857)	p-PKCD(T505)	0.064881
p-JAK1(Y1022/1023)	p-PDFGRA(Y849)/PDGFRB(Y857)	0.064493
p-RAF(C-)(S338)	p-CRKII(Y221)	0.064485
p-EGFR(Y1086)	p-STAT5(Y694)	0.064292
p-JAK1(Y1022/1023)	p-GSK3A(S21)	0.064201
p-MET(Y1234/1235)	p-EGFR(Y1086)	0.064137
p-STAT6(Y641)	p-PDFGRA(Y849)/PDGFRB(Y857)	0.064109
p-PDGFRB(Y1009)	p-CREB(S133)	0.064067
p-CDK2(T160)	p-P70S6K(T421/S424)	0.063581
p-PLCG2(Y759)	p-PYK2(Y402)	0.063541
p-STAT3(Y705)	p-PLCG2(Y759)	0.063225
p-EGFR(Y1086)	p-EGFR(Y845)	0.063221
p-STAT1(Y701)	p-GAB1(Y627)	0.063079
p-FGFR1(Y653/654)	p-STAT6(Y641)	0.062912
p-SYK(Y525/526)	p-STAT3(Y705)	0.062899
p-SRC(Y527)	p-P38MAPK(T180/Y182)	0.062845
p-CRKII(Y221)	p-RAF(C-)(S259)	0.062797
p-CRKII(Y221)	p-PDK1(S241)	0.062606
p-PI3KP85(Y458)P55(Y199)	p-PKCPAN/G(T514)	0.062386
p-EGFR(Y1086)	p-STAT1(Y701)	0.062225
p-CRKL(Y207)	p-P38MAPK(T180/Y182)	0.061968
p-IRS1(S1101)	p-GAB2(S159)	0.061888
p-PI3KP85(Y458)P55(Y199)	p-P70S6K(T421/S424)	0.061633
p-ERBB2(Y1221/1222)	p-STAT3(S727)	0.061404
p-PYK2(Y402)	p-STAT6(Y641)	0.061016
p-EGFR(Y1086)	p-PLCG2(Y759)	0.06085
p-STAT6(Y641)	p-FGFR1(Y653/654)	0.060359
p-CREB(S133)	p-FOXO3A(S253)	0.060302
p-STAT1(Y701)	p-SHP2(Y542)	0.060296
p-ERBB2(Y1221/1222)	p-STAT3(Y705)	0.060258
p-ERBB4(Y1284)	p-ABL(C-)(Y245)	0.060151
p-FGFR1(Y653/654)	p-STAT5(Y694)	0.059697
p-ABL(C-)(Y245)	p-KIT(C-)(Y719)	0.059517
p-P38MAPK(T180/Y182)	p-SRC(Y527)	0.059321
p-STAT6(Y641)	p-SHC(Y239/240)	0.059137
p-ERBB2(Y1221/1222)	p-PLCG2(Y759)	0.058989
p-FAK(Y576/577)	p-ZAP70(Y319)/SYK(Y352)	0.058831
p-STAT6(Y641)	p-CDC2(Y15)	0.058797
p-PDGFRB(Y1009)	p-P38MAPK(T180/Y182)	0.058747
p-ZAP70(Y319)/SYK(Y352)	p-GSK3A(S21)	0.058347
p-ERBB4(Y1284)	p-FGFR1(Y653/654)	0.058202
p-MET(Y1234/1235)	p-EGFR(Y1068)	0.05818
p-PYK2(Y402)	p-STAT1(Y701)	0.057717
p-P70S6K(T421/S424)	p-CREB(S133)	0.057592
p-CDC2(Y15)	p-MTOR(S2448)	0.057515
p-STAT6(Y641)	p-PDGFRB(Y1009)	0.057414
p-PLCG2(Y759)	p-SHP2(Y542)	0.057361
p-STAT6(Y641)	p-STAT3(Y705)	0.057208
p-KIT(C-)(Y719)	p-ABL(C-)(Y245)	0.05716
p-RAF(C-)(S259)	p-GSK3A(S21)	0.057102
p-ABL(C-)(Y245)	p-SRC(Y527)	0.0569
p-RAF(C-)(S259)	p-ABL(C-)(Y245)	0.056737
p-PLCG2(Y759)	p-EGFR(Y1173)	0.056607
p-SHP2(Y542)	p-GAB1(Y627)	0.056353
p-EGFR(Y1173)	p-EGFR(Y1068)	0.056307
p-SRC(Y527)	p-CRKL(Y207)	0.056056
p-SYK(Y525/526)	p-EGFR(Y1173)	0.055996
p-PLCG2(Y759)	p-PDGFRB(Y1009)	0.055932
p-PKCPAN/G(T514)	p-P90RSK(S380)	0.055902
p-ERBB4(Y1284)	p-CRKII(Y221)	0.055865
p-SRC(Y416)	p-STAT1(Y701)	0.055718
p-FAK(Y576/577)	p-KIT(C-)(Y719)	0.055639
p-MTOR(S2448)	p-P38MAPK(T180/Y182)	0.055628
p-SHP2(Y542)	p-PDGFRB(Y1009)	0.055129
p-SHC(Y239/240)	p-SAPK/JNK(T183/Y185)	0.055095
p-EGFR(Y1173)	p-MET(Y1234/1235)	0.054957
p-STAT6(Y641)	p-MEK(1/2)(S217/221)	0.054951
p-ERBB4(Y1284)	p-RAF(C-)(S338)	0.05474
p-SAPK/JNK(T183/Y185)	p-CDK2(T160)	0.054694
p-PLCG2(Y759)	p-GAB2(S159)	0.05465
p-PYK2(Y402)	p-ERK1/2(T202/Y204)	0.054558
p-PYK2(Y402)	p-PDGFRB(Y1009)	0.054469
p-FOXO3A(S253)	p-CREB(S133)	0.054401
p-PDGFRA(Y754)	p-4EBP1(S65)	0.054171
p-GSK3A(S21)	p-GAB2(S159)	0.05411
p-PLCG1(Y783)	p-PI3KP85(Y458)P55(Y199)	0.054004
p-SHP2(Y542)	p-MTOR(S2448)	0.053885
p-SYK(Y525/526)	p-PLCG2(Y759)	0.053698
p-ERBB4(Y1284)	p-SYK(Y525/526)	0.053538
p-PYK2(Y402)	p-FOXO1(S319)/FOXO4(S262)	0.053536
p-P90RSK(S380)	p-PKCD(T505)	0.053448
p-ERBB2(Y1221/1222)	p-FGFR1(Y653/654)	0.053282
p-RAF(C-)(S338)	p-PDK1(S241)	0.053232
p-PDGFRA(Y754)	p-PKCD(T505)	0.053211
p-PDGFRA(Y754)	p-CDC2(Y15)	0.05321
p-EGFR(Y1086)	p-ERK1/2(T202/Y204)	0.053102
p-P38MAPK(T180/Y182)	p-CRKL(Y207)	0.053092
p-STAT6(Y641)	p-PDGFRA(Y754)	0.053013
p-PDFGRA(Y849)/PDGFRB(Y857)	p-ERBB4(Y1284)	0.053011
p-ERBB4(Y1284)	p-CDC2(Y15)	0.052976
p-PDGFRB(Y1009)	p-PTEN(S380)	0.052971
p-PI3KP85(Y458)P55(Y199)	p-P38MAPK(T180/Y182)	0.052818
p-S6RIBPROT(S240/244)	p-FOXO1(S319)/FOXO4(S262)	0.052485
p-STAT6(Y641)	p-EGFR(Y1086)	0.052471
p-ERBB2(Y1221/1222)	p-SRC(Y416)	0.052461
p-PYK2(Y402)	p-MEK(1/2)(S217/221)	0.052449
p-CDC2(Y15)	p-PKCD(T505)	0.052375
p-PI3KP85(Y458)P55(Y199)	p-PLCG1(Y783)	0.051998
p-STAT6(Y641)	p-ERBB2(Y1221/1222)	0.05196
p-JAK1(Y1022/1023)	p-IGF1RB(Y1135/1136)/INSRB	0.051695
p-GAB2(S159)	p-IRS1(S1101)	0.051595
p-S6RIBPROT(S240/244)	p-CDK2(T160)	0.051435
p-PDFGRA(Y849)/PDGFRB(Y857)	p-JAK1(Y1022/1023)	0.051179
p-IRS1(S1101)	p-IGF1RB(Y1135/1136)/INSRB	0.050662
p-ZAP70(Y319)/SYK(Y352)	p-STAT3(Y705)	0.050654
p-ABL(C-)(Y245)	p-STAT5(Y694)	0.050583
p-CREB(S133)	p-CDK2(T160)	0.050518
p-STAT1(Y701)	p-CDC2(Y15)	0.050366
p-AKT(S473)	p-P70S6K(T421/S424)	0.05035
p-IGF1RB(Y1135/1136)/INSRB	p-IRS1(S1101)	0.05031
p-PLCG1(Y783)	p-CREB(S133)	0.050265
p-ERBB4(Y1284)	p-STAT1(Y701)	0.050176
p-STAT1(Y701)	p-SRC(Y416)	0.050007
p-PLCG2(Y759)	p-PLCG1(Y783)	0.049904
p-SRC(Y416)	p-PYK2(Y402)	0.049623
p-ERBB4(Y1284)	p-RAF(C-)(S259)	0.049595
p-FGFR1(Y653/654)	p-PLCG1(Y783)	0.049578
p-SHP2(Y542)	p-STAT6(Y641)	0.049532
p-STAT6(Y641)	p-PKCD(T505)	0.049475
p-PLCG2(Y759)	p-EGFR(Y1086)	0.049332
p-GSK3A(S21)	p-PDK1(S241)	0.048987
p-STAT6(Y641)	p-SYK(Y525/526)	0.04875
p-PI3KP85(Y458)P55(Y199)	p-AKT(S473)	0.048743
p-FOXO3A(S253)	p-STAT3(S727)	0.048534
p-FGFR1(Y653/654)	p-ZAP70(Y319)/SYK(Y352)	0.048368
p-SYK(Y525/526)	p-PYK2(Y402)	0.048194
p-MET(Y1234/1235)	p-ERBB2(Y1221/1222)	0.048135
p-FGFR1(Y653/654)	p-EGFR(Y845)	0.048053
p-STAT3(Y705)	p-GAB2(S159)	0.048022
p-FGFR1(Y653/654)	p-SRC(Y416)	0.048008
p-PLCG2(Y759)	p-MET(Y1234/1235)	0.047954
p-GAB1(Y627)	p-P90RSK(S380)	0.047832
p-PLCG2(Y759)	p-FGFR1(Y653/654)	0.047562
p-PDGFRB(Y1009)	p-STAT3(S727)	0.047401
p-PLCG2(Y759)	p-EGFR(Y845)	0.047399
p-4EBP1(S65)	p-4EBP1(T37/46)	0.047345
p-MET(Y1234/1235)	p-STAT3(Y705)	0.047335
p-EGFR(Y1086)	p-PYK2(Y402)	0.047156
p-STAT1(Y701)	p-ERK1/2(T202/Y204)	0.047069
p-SRC(Y416)	p-CRKII(Y221)	0.047024
p-ZAP70(Y319)/SYK(Y352)	p-IGF1RB(Y1135/1136)/INSRB	0.046864
p-SHP2(Y542)	p-SAPK/JNK(T183/Y185)	0.046834
p-EGFR(Y1068)	p-SRC(Y416)	0.046403
p-PKCD(T505)	p-IRS1(S1101)	0.046368
p-STAT6(Y641)	p-STAT1(Y701)	0.046218
p-SHP2(Y542)	p-4EBP1(T37/46)	0.046129
p-FOXO1(S319)/FOXO4(S262)	p-S6RIBPROT(S240/244)	0.04611
p-ERK1/2(T202/Y204)	p-SHC(Y239/240)	0.045638
p-PDGFRB(Y1009)	p-PLCG1(Y783)	0.045612
p-PLCG2(Y759)	p-GAB1(Y627)	0.045443
p-PDGFRB(Y1009)	p-PDGFRA(Y754)	0.045346
p-JAK1(Y1022/1023)	p-CRKII(Y221)	0.04528
p-MET(Y1234/1235)	p-SRC(Y416)	0.045107
p-PLCG2(Y759)	p-FAK(Y576/577)	0.044929
p-SYK(Y525/526)	p-JAK1(Y1022/1023)	0.044735
p-STAT1(Y701)	p-EGFR(Y1173)	0.044715
p-S6RIBPROT(S240/244)	p-CREB(S133)	0.044704
p-KIT(C-)(Y719)	p-ERK1/2(T202/Y204)	0.044649
p-GAB1(Y627)	p-PDGFRB(Y1009)	0.044588
p-STAT5(Y694)	p-ABL(C-)(Y245)	0.044584
p-PDGFRA(Y754)	p-IRS1(S1101)	0.044457
p-S6RIBPROT(S240/244)	p-P38MAPK(T180/Y182)	0.044434
p-SYK(Y525/526)	p-CRKII(Y221)	0.04443
p-SRC(Y416)	p-MTOR(S2448)	0.044384
p-FAK(Y576/577)	p-SYK(Y525/526)	0.044381
p-FGFR1(Y653/654)	p-EGFR(Y1068)	0.044341
p-EGFR(Y1086)	p-STAT6(Y641)	0.044091
p-MET(Y1234/1235)	p-GAB1(Y627)	0.04406
p-EGFR(Y1086)	p-FAK(Y576/577)	0.04396
p-FOXO3A(S253)	p-MTOR(S2448)	0.043937
p-SRC(Y416)	p-MET(Y1349)	0.043936
p-FGFR1(Y653/654)	p-EGFR(Y1173)	0.04388
p-PI3KP85(Y458)P55(Y199)	p-CDK2(T160)	0.043787
p-S6RIBPROT(S240/244)	p-CRKL(Y207)	0.043641
p-CDC2(Y15)	p-FOXO3A(S253)	0.04363
p-PLCG1(Y783)	p-MET(Y1234/1235)	0.04358
p-JAK1(Y1022/1023)	p-SRC(Y416)	0.043489
p-STAT6(Y641)	p-ZAP70(Y319)/SYK(Y352)	0.043477
p-IRS1(S1101)	p-GSK3A(S21)	0.043394
p-EGFR(Y1086)	p-STAT3(Y705)	0.043332
p-STAT5(Y694)	p-STAT1(Y701)	0.043252
p-S6RIBPROT(S240/244)	p-P70S6K(T421/S424)	0.043224
p-SYK(Y525/526)	p-ZAP70(Y319)/SYK(Y352)	0.043186
p-STAT3(Y705)	p-STAT1(Y701)	0.043175
p-EGFR(Y1068)	p-MET(Y1234/1235)	0.043139
p-STAT1(Y701)	p-EGFR(Y1086)	0.043136
p-PLCG2(Y759)	p-KIT(C-)(Y719)	0.043072
p-CRKL(Y207)	p-CDK2(T160)	0.042864
p-PI3KP85(Y458)P55(Y199)	p-SRC(Y527)	0.042861
p-PDGFRB(Y1009)	p-CRKL(Y207)	0.042813
p-SRC(Y416)	p-ERK1/2(T202/Y204)	0.042681
p-RAF(C-)(S338)	p-PDFGRA(Y849)/PDGFRB(Y857)	0.042561
p-SAPK/JNK(T183/Y185)	p-SHC(Y239/240)	0.042557
p-STAT3(Y705)	p-EGFR(Y845)	0.042537
p-P38MAPK(T180/Y182)	p-S6RIBPROT(S240/244)	0.042518
p-CDK2(T160)	p-FOXO3A(S253)	0.042502
p-IGF1RB(Y1135/1136)/INSRB	p-GAB2(S159)	0.042483
p-STAT3(Y705)	p-ABL(C-)(Y245)	0.042473
p-STAT3(S727)	p-FOXO3A(S253)	0.042427
p-PDK1(S241)	p-GSK3A(S21)	0.042376
p-PKCD(T505)	p-PDGFRA(Y754)	0.042246
p-PLCG2(Y759)	p-MEK(1/2)(S217/221)	0.042195
p-P38MAPK(T180/Y182)	p-MTOR(S2448)	0.042192
p-STAT3(Y705)	p-MET(Y1349)	0.042127
p-FGFR1(Y653/654)	p-ABL(C-)(Y245)	0.042118
p-SRC(Y416)	p-EGFR(Y845)	0.041921
p-PKCD(T505)	p-STAT3(S727)	0.041835
p-SYK(Y525/526)	p-ERBB4(Y1284)	0.041724
p-FOXO1(S319)/FOXO4(S262)	p-CRKII(Y221)	0.041714
p-EGFR(Y845)	p-GAB1(Y627)	0.041693
p-AKT(S473)	p-4EBP1(T37/46)	0.041667
p-SRC(Y416)	p-EGFR(Y1086)	0.041519
p-ERBB2(Y1221/1222)	p-PDK1(S241)	0.041513
p-IRS1(S1101)	p-PDGFRA(Y754)	0.041305
p-IGF1RB(Y1135/1136)/INSRB	p-4EBP1(S65)	0.041265
p-FAK(Y576/577)	p-EGFR(Y1086)	0.041224
p-EGFR(Y1086)	p-ABL(C-)(Y245)	0.041213
p-PDGFRA(Y754)	p-IGF1RB(Y1135/1136)/INSRB	0.041197
p-ZAP70(Y319)/SYK(Y352)	p-RAF(C-)(S338)	0.041194
p-CRKII(Y221)	p-ERBB2(Y1221/1222)	0.041177
p-SRC(Y527)	p-FOXO3A(S253)	0.041167
p-STAT3(Y705)	p-PLCG1(Y783)	0.041129
p-MET(Y1234/1235)	p-PLCG2(Y759)	0.041097
p-EGFR(Y1068)	p-EGFR(Y1086)	0.04086
p-ERBB2(Y1221/1222)	p-STAT6(Y641)	0.040838
p-CRKII(Y221)	p-PKCPAN/G(T514)	0.040813
p-PKCD(T505)	p-CDC2(Y15)	0.040665
p-ERBB4(Y1284)	p-PLCG2(Y759)	0.040505
p-JAK1(Y1022/1023)	p-RAF(C-)(S338)	0.040437
p-CDC2(Y15)	p-PDGFRA(Y754)	0.040377
p-STAT3(Y705)	p-EGFR(Y1068)	0.040341
p-SHP2(Y542)	p-PKCD(T505)	0.04033
p-STAT3(Y705)	p-CRKII(Y221)	0.04031
p-STAT3(Y705)	p-RAF(C-)(S259)	0.040247
p-PLCG2(Y759)	p-ZAP70(Y319)/SYK(Y352)	0.040083
p-ERBB2(Y1221/1222)	p-PLCG1(Y783)	0.039995
p-PDFGRA(Y849)/PDGFRB(Y857)	p-MTOR(S2448)	0.039946
p-PLCG2(Y759)	p-STAT3(Y705)	0.039933
p-MEK(1/2)(S217/221)	p-PTEN(S380)	0.039806
p-CREB(S133)	p-PI3KP85(Y458)P55(Y199)	0.039782
p-ABL(C-)(Y245)	p-PTEN(S380)	0.039699
p-CRKL(Y207)	p-AKT(S473)	0.039673
p-ERBB2(Y1221/1222)	p-RAF(C-)(S338)	0.03964
p-SYK(Y525/526)	p-STAT6(Y641)	0.039634
p-SRC(Y527)	p-PI3KP85(Y458)P55(Y199)	0.039378
p-CDC2(Y15)	p-4EBP1(S65)	0.039298
p-CDC2(Y15)	p-STAT3(S727)	0.039272
p-EGFR(Y1086)	p-ZAP70(Y319)/SYK(Y352)	0.03927
p-SAPK/JNK(T183/Y185)	p-SHP2(Y542)	0.039211
p-CDK2(T160)	p-P38MAPK(T180/Y182)	0.03919
p-CRKL(Y207)	p-PDGFRB(Y1009)	0.03913
p-PDGFRB(Y1009)	p-MEK(1/2)(S217/221)	0.038803
p-PLCG1(Y783)	p-EGFR(Y1173)	0.038797
p-CRKII(Y221)	p-AKT(S473)	0.038361
p-PDGFRB(Y1009)	p-GAB1(Y627)	0.038299
p-ERBB4(Y1284)	p-EGFR(Y1086)	0.038281
p-ZAP70(Y319)/SYK(Y352)	p-ERBB4(Y1284)	0.038234
p-PDGFRA(Y754)	p-P90RSK(S380)	0.038148
p-FOXO3A(S253)	p-CDK2(T160)	0.03812
p-CRKL(Y207)	p-P70S6K(T421/S424)	0.037934
p-PLCG2(Y759)	p-MTOR(S2448)	0.037809
p-GAB2(S159)	p-IGF1RB(Y1135/1136)/INSRB	0.0378
p-CRKL(Y207)	p-SRC(Y527)	0.037561
p-SRC(Y416)	p-P38MAPK(T180/Y182)	0.037476
p-STAT1(Y701)	p-PDGFRA(Y754)	0.037401
p-MET(Y1234/1235)	p-FAK(Y576/577)	0.037366
p-STAT6(Y641)	p-P90RSK(S380)	0.037232
p-GAB2(S159)	p-PTEN(S380)	0.037196
p-PI3KP85(Y458)P55(Y199)	p-FOXO3A(S253)	0.037112
p-SHP2(Y542)	p-ERK1/2(T202/Y204)	0.037023
p-CRKII(Y221)	p-SRC(Y416)	0.03689
p-SYK(Y525/526)	p-EGFR(Y845)	0.036777
p-CRKII(Y221)	p-S6RIBPROT(S240/244)	0.036678
p-AKT(S473)	p-CRKII(Y221)	0.036593
p-CRKL(Y207)	p-PKCPAN/G(T514)	0.036542
p-FAK(Y576/577)	p-PDFGRA(Y849)/PDGFRB(Y857)	0.036141
p-MTOR(S2448)	p-STAT3(S727)	0.036105
p-CRKII(Y221)	p-PKCD(T505)	0.035946
p-ERBB4(Y1284)	p-PDK1(S241)	0.035781
p-EGFR(Y1086)	p-SHP2(Y542)	0.035725
p-EGFR(Y1086)	p-ERBB4(Y1284)	0.035675
p-P70S6K(T421/S424)	p-PKCPAN/G(T514)	0.035662
p-MET(Y1349)	p-PDGFRA(Y754)	0.035474
p-STAT5(Y694)	p-4EBP1(S65)	0.035119
p-P38MAPK(T180/Y182)	p-STAT3(S727)	0.035102
p-P38MAPK(T180/Y182)	p-MEK(1/2)(S217/221)	0.035081
p-P38MAPK(T180/Y182)	p-PKCPAN/G(T514)	0.035048
p-PDGFRB(Y1009)	p-SHC(Y239/240)	0.034976
p-FAK(Y576/577)	p-MET(Y1234/1235)	0.034911
p-SYK(Y525/526)	p-EGFR(Y1068)	0.034902
p-PYK2(Y402)	p-PKCD(T505)	0.034892
p-STAT3(Y705)	p-RAF(C-)(S338)	0.034828
p-P70S6K(T421/S424)	p-S6RIBPROT(S240/244)	0.03479
p-ZAP70(Y319)/SYK(Y352)	p-4EBP1(S65)	0.034769
p-SHP2(Y542)	p-STAT1(Y701)	0.034697
p-ZAP70(Y319)/SYK(Y352)	p-MET(Y1234/1235)	0.034519
p-STAT5(Y694)	p-FOXO1(S319)/FOXO4(S262)	0.034465
p-SHC(Y239/240)	p-STAT3(S727)	0.034421
p-GAB1(Y627)	p-MEK(1/2)(S217/221)	0.034363
p-CRKII(Y221)	p-ERBB4(Y1284)	0.034319
p-EGFR(Y1173)	p-GAB2(S159)	0.034313
p-PDGFRB(Y1009)	p-SHP2(Y542)	0.034197
p-PYK2(Y402)	p-PLCG2(Y759)	0.03413
p-STAT3(S727)	p-SHC(Y239/240)	0.034112
p-SRC(Y416)	p-EGFR(Y1173)	0.034037
p-SRC(Y416)	p-SYK(Y525/526)	0.033919
p-P90RSK(S380)	p-PKCPAN/G(T514)	0.03364
p-FAK(Y576/577)	p-PYK2(Y402)	0.033479
p-STAT3(Y705)	p-IRS1(S1101)	0.033475
p-ZAP70(Y319)/SYK(Y352)	p-STAT3(S727)	0.033201
p-GAB2(S159)	p-SHC(Y239/240)	0.033195
p-PKCPAN/G(T514)	p-PI3KP85(Y458)P55(Y199)	0.033109
p-ZAP70(Y319)/SYK(Y352)	p-FAK(Y576/577)	0.03306
p-PYK2(Y402)	p-EGFR(Y1173)	0.03303
p-SYK(Y525/526)	p-SHC(Y239/240)	0.032868
p-EGFR(Y1173)	p-SRC(Y416)	0.032816
p-STAT1(Y701)	p-4EBP1(S65)	0.032791
p-KIT(C-)(Y719)	p-GAB2(S159)	0.032626
p-SAPK/JNK(T183/Y185)	p-FOXO1(S319)/FOXO4(S262)	0.032596
p-EGFR(Y1068)	p-4EBP1(T37/46)	0.032588
p-STAT1(Y701)	p-MTOR(S2448)	0.032536
p-STAT1(Y701)	p-EGFR(Y845)	0.03249
p-FAK(Y576/577)	p-FOXO3A(S253)	0.032426
p-ERBB2(Y1221/1222)	p-JAK1(Y1022/1023)	0.032413
p-STAT1(Y701)	p-EGFR(Y1068)	0.032241
p-SHP2(Y542)	p-PTEN(S380)	0.032236
p-FAK(Y576/577)	p-STAT5(Y694)	0.032132
p-ZAP70(Y319)/SYK(Y352)	p-PDK1(S241)	0.031903
p-EGFR(Y1068)	p-GAB2(S159)	0.031784
p-CRKII(Y221)	p-P70S6K(T421/S424)	0.031765
p-GSK3A(S21)	p-CRKII(Y221)	0.03173
p-PDGFRA(Y754)	p-4EBP1(T37/46)	0.031698
p-ERBB2(Y1221/1222)	p-MET(Y1234/1235)	0.031698
p-STAT6(Y641)	p-IRS1(S1101)	0.031542
p-FGFR1(Y653/654)	p-JAK1(Y1022/1023)	0.031507
p-CRKL(Y207)	p-S6RIBPROT(S240/244)	0.03148
p-MEK(1/2)(S217/221)	p-SHC(Y239/240)	0.031477
p-PLCG1(Y783)	p-EGFR(Y1068)	0.031475
p-PKCD(T505)	p-MEK(1/2)(S217/221)	0.031452
p-CRKII(Y221)	p-P90RSK(S380)	0.031356
p-ERBB4(Y1284)	p-SRC(Y416)	0.031324
p-PKCPAN/G(T514)	p-CRKL(Y207)	0.031217
p-P90RSK(S380)	p-FOXO1(S319)/FOXO4(S262)	0.031131
p-PKCD(T505)	p-RAF(C-)(S338)	0.031044
p-EGFR(Y1068)	p-GAB1(Y627)	0.030928
p-ZAP70(Y319)/SYK(Y352)	p-ERBB2(Y1221/1222)	0.03085
p-ERBB4(Y1284)	p-MTOR(S2448)	0.030831
p-MET(Y1349)	p-EGFR(Y1068)	0.03081
p-EGFR(Y1173)	p-MET(Y1349)	0.030773
p-ZAP70(Y319)/SYK(Y352)	p-PLCG2(Y759)	0.03075
p-CDC2(Y15)	p-ERK1/2(T202/Y204)	0.030657
p-P38MAPK(T180/Y182)	p-SHC(Y239/240)	0.030569
p-CDK2(T160)	p-SRC(Y527)	0.030568
p-PYK2(Y402)	p-MTOR(S2448)	0.030387
p-AKT(S473)	p-PDK1(S241)	0.030242
p-SHP2(Y542)	p-CRKL(Y207)	0.030236
p-STAT3(S727)	p-MEK(1/2)(S217/221)	0.030209
p-PKCPAN/G(T514)	p-FOXO3A(S253)	0.030065
p-GAB1(Y627)	p-SHP2(Y542)	0.030065
p-STAT3(S727)	p-PDK1(S241)	0.030055
p-FOXO3A(S253)	p-PDK1(S241)	0.029917
p-EGFR(Y1086)	p-PDGFRA(Y754)	0.029861
p-EGFR(Y1173)	p-GAB1(Y627)	0.02982
p-FAK(Y576/577)	p-JAK1(Y1022/1023)	0.029777
p-PLCG2(Y759)	p-ERK1/2(T202/Y204)	0.029687
p-P70S6K(T421/S424)	p-AKT(S473)	0.029677
p-AKT(S473)	p-FOXO3A(S253)	0.029573
p-STAT6(Y641)	p-JAK1(Y1022/1023)	0.029434
p-MEK(1/2)(S217/221)	p-P38MAPK(T180/Y182)	0.029213
p-SRC(Y416)	p-FOXO1(S319)/FOXO4(S262)	0.029187
p-RAF(C-)(S338)	p-P70S6K(T421/S424)	0.029099
p-SYK(Y525/526)	p-KIT(C-)(Y719)	0.029023
p-SRC(Y416)	p-JAK1(Y1022/1023)	0.029005
p-CDK2(T160)	p-CRKL(Y207)	0.028967
p-SYK(Y525/526)	p-STAT1(Y701)	0.028951
p-ABL(C-)(Y245)	p-RAF(C-)(S338)	0.028889
p-JAK1(Y1022/1023)	p-ERBB2(Y1221/1222)	0.028871
p-EGFR(Y1086)	p-PLCG1(Y783)	0.028869
p-MET(Y1234/1235)	p-ZAP70(Y319)/SYK(Y352)	0.028836
p-ABL(C-)(Y245)	p-CDK2(T160)	0.028814
p-SHP2(Y542)	p-SRC(Y527)	0.028796
p-CDK2(T160)	p-CREB(S133)	0.028715
p-STAT3(S727)	p-CREB(S133)	0.028658
p-ERBB2(Y1221/1222)	p-ZAP70(Y319)/SYK(Y352)	0.028597
p-ERBB2(Y1221/1222)	p-CDK2(T160)	0.028552
p-SHP2(Y542)	p-MEK(1/2)(S217/221)	0.028549
p-S6RIBPROT(S240/244)	p-P90RSK(S380)	0.028441
p-PKCD(T505)	p-IGF1RB(Y1135/1136)/INSRB	0.028398
p-SHP2(Y542)	p-P38MAPK(T180/Y182)	0.028338
p-PLCG2(Y759)	p-PDFGRA(Y849)/PDGFRB(Y857)	0.028189
p-MET(Y1349)	p-GSK3A(S21)	0.027902
p-KIT(C-)(Y719)	p-4EBP1(S65)	0.02786
p-PYK2(Y402)	p-4EBP1(T37/46)	0.027791
p-ZAP70(Y319)/SYK(Y352)	p-FGFR1(Y653/654)	0.027789
p-RAF(C-)(S259)	p-GAB2(S159)	0.027685
p-GAB1(Y627)	p-EGFR(Y1173)	0.027615
p-IGF1RB(Y1135/1136)/INSRB	p-PDGFRA(Y754)	0.027593
p-JAK1(Y1022/1023)	p-STAT3(Y705)	0.027587
p-PDFGRA(Y849)/PDGFRB(Y857)	p-SRC(Y416)	0.027583
p-SHP2(Y542)	p-CDC2(Y15)	0.027562
p-KIT(C-)(Y719)	p-IGF1RB(Y1135/1136)/INSRB	0.027488
p-PLCG2(Y759)	p-STAT5(Y694)	0.027473
p-FOXO3A(S253)	p-SRC(Y527)	0.027424
p-PDFGRA(Y849)/PDGFRB(Y857)	p-ERK1/2(T202/Y204)	0.027361
p-CRKII(Y221)	p-IRS1(S1101)	0.027258
p-EGFR(Y1068)	p-IGF1RB(Y1135/1136)/INSRB	0.027217
p-ZAP70(Y319)/SYK(Y352)	p-STAT6(Y641)	0.02717
p-SRC(Y416)	p-FGFR1(Y653/654)	0.027151
p-SRC(Y416)	p-MET(Y1234/1235)	0.02714
p-CDC2(Y15)	p-SHC(Y239/240)	0.027112
p-PKCD(T505)	p-PDK1(S241)	0.027058
p-P90RSK(S380)	p-P70S6K(T421/S424)	0.027032
p-STAT6(Y641)	p-KIT(C-)(Y719)	0.026928
p-EGFR(Y1086)	p-CDC2(Y15)	0.026909
p-PLCG2(Y759)	p-ABL(C-)(Y245)	0.026907
p-CDK2(T160)	p-PI3KP85(Y458)P55(Y199)	0.026812
p-STAT3(S727)	p-PTEN(S380)	0.026734
p-ERK1/2(T202/Y204)	p-KIT(C-)(Y719)	0.026716
p-P70S6K(T421/S424)	p-CDK2(T160)	0.026683
p-ERBB2(Y1221/1222)	p-PYK2(Y402)	0.026655
p-P38MAPK(T180/Y182)	p-CREB(S133)	0.026574
p-ZAP70(Y319)/SYK(Y352)	p-SYK(Y525/526)	0.026459
p-PLCG2(Y759)	p-STAT1(Y701)	0.026421
p-EGFR(Y1068)	p-PLCG1(Y783)	0.026235
p-EGFR(Y1068)	p-PDGFRA(Y754)	0.026074
p-CDC2(Y15)	p-STAT1(Y701)	0.026022
p-EGFR(Y845)	p-CRKII(Y221)	0.025969
p-STAT3(Y705)	p-PYK2(Y402)	0.025957
p-PKCD(T505)	p-SHP2(Y542)	0.02593
p-JAK1(Y1022/1023)	p-4EBP1(S65)	0.025923
p-PDFGRA(Y849)/PDGFRB(Y857)	p-PDGFRA(Y754)	0.025908
p-SYK(Y525/526)	p-ERK1/2(T202/Y204)	0.025889
p-MTOR(S2448)	p-SHC(Y239/240)	0.025839
p-SHP2(Y542)	p-PLCG2(Y759)	0.025786
p-EGFR(Y1086)	p-MET(Y1349)	0.025785
p-PDGFRA(Y754)	p-ERK1/2(T202/Y204)	0.025779
p-PLCG2(Y759)	p-JAK1(Y1022/1023)	0.025778
p-SRC(Y527)	p-P70S6K(T421/S424)	0.025742
p-SYK(Y525/526)	p-PDFGRA(Y849)/PDGFRB(Y857)	0.02573
p-CRKII(Y221)	p-ZAP70(Y319)/SYK(Y352)	0.025683
p-4EBP1(T37/46)	p-4EBP1(S65)	0.025586
p-EGFR(Y1086)	p-PDGFRB(Y1009)	0.025518
p-STAT1(Y701)	p-KIT(C-)(Y719)	0.025512
p-SRC(Y416)	p-PDFGRA(Y849)/PDGFRB(Y857)	0.02541
p-PDK1(S241)	p-RAF(C-)(S338)	0.025323
p-AKT(S473)	p-CREB(S133)	0.025304
p-P38MAPK(T180/Y182)	p-FOXO1(S319)/FOXO4(S262)	0.025164
p-ERBB2(Y1221/1222)	p-EGFR(Y1086)	0.025079
p-SYK(Y525/526)	p-SHP2(Y542)	0.025052
p-PLCG2(Y759)	p-ERBB4(Y1284)	0.024992
p-EGFR(Y1086)	p-MEK(1/2)(S217/221)	0.024986
p-PDGFRB(Y1009)	p-SRC(Y527)	0.024908
p-P38MAPK(T180/Y182)	p-CDC2(Y15)	0.024887
p-P90RSK(S380)	p-GSK3A(S21)	0.024842
p-P90RSK(S380)	p-SAPK/JNK(T183/Y185)	0.02479
p-STAT1(Y701)	p-STAT6(Y641)	0.024731
p-STAT3(Y705)	p-PDFGRA(Y849)/PDGFRB(Y857)	0.024595
p-EGFR(Y845)	p-GAB2(S159)	0.024592
p-STAT6(Y641)	p-ABL(C-)(Y245)	0.024555
p-EGFR(Y845)	p-FOXO1(S319)/FOXO4(S262)	0.024424
p-CDC2(Y15)	p-STAT5(Y694)	0.024372
p-AKT(S473)	p-CRKL(Y207)	0.02429
p-STAT1(Y701)	p-PLCG2(Y759)	0.024252
p-PYK2(Y402)	p-CDC2(Y15)	0.024242
p-MEK(1/2)(S217/221)	p-FOXO1(S319)/FOXO4(S262)	0.024205
p-SRC(Y416)	p-4EBP1(S65)	0.024147
p-FGFR1(Y653/654)	p-STAT1(Y701)	0.024106
p-STAT6(Y641)	p-CRKII(Y221)	0.024075
p-PDK1(S241)	p-RAF(C-)(S259)	0.02407
p-EGFR(Y845)	p-SRC(Y416)	0.024061
p-PDGFRB(Y1009)	p-PYK2(Y402)	0.023975
p-STAT3(Y705)	p-STAT5(Y694)	0.023891
p-GAB2(S159)	p-GSK3A(S21)	0.02387
p-SHC(Y239/240)	p-P38MAPK(T180/Y182)	0.023782
p-FAK(Y576/577)	p-CREB(S133)	0.023674
p-GAB1(Y627)	p-EGFR(Y1068)	0.02366
p-SRC(Y416)	p-SHP2(Y542)	0.023603
p-MET(Y1234/1235)	p-MET(Y1349)	0.023548
p-STAT6(Y641)	p-4EBP1(S65)	0.023494
p-EGFR(Y1086)	p-MTOR(S2448)	0.023444
p-FAK(Y576/577)	p-CDC2(Y15)	0.023383
p-STAT3(Y705)	p-SRC(Y416)	0.023332
p-PLCG2(Y759)	p-EGFR(Y1068)	0.023307
p-4EBP1(S65)	p-GAB2(S159)	0.023273
p-ZAP70(Y319)/SYK(Y352)	p-PLCG1(Y783)	0.023273
p-ERBB2(Y1221/1222)	p-IRS1(S1101)	0.023271
p-PDGFRB(Y1009)	p-SAPK/JNK(T183/Y185)	0.023263
p-STAT6(Y641)	p-STAT5(Y694)	0.023106
p-SRC(Y527)	p-CREB(S133)	0.023097
p-STAT5(Y694)	p-4EBP1(T37/46)	0.022933
p-CRKII(Y221)	p-JAK1(Y1022/1023)	0.022847
p-MEK(1/2)(S217/221)	p-STAT3(S727)	0.022756
p-GSK3A(S21)	p-SAPK/JNK(T183/Y185)	0.022728
p-PKCPAN/G(T514)	p-CRKII(Y221)	0.022591
p-S6RIBPROT(S240/244)	p-4EBP1(T37/46)	0.022588
p-SHP2(Y542)	p-PI3KP85(Y458)P55(Y199)	0.022487
p-PI3KP85(Y458)P55(Y199)	p-P90RSK(S380)	0.022458
p-FAK(Y576/577)	p-IRS1(S1101)	0.022436
p-SAPK/JNK(T183/Y185)	p-4EBP1(T37/46)	0.022434
p-FOXO3A(S253)	p-PKCD(T505)	0.022385
p-GAB1(Y627)	p-PYK2(Y402)	0.022317
p-IRS1(S1101)	p-PKCD(T505)	0.022316
p-ZAP70(Y319)/SYK(Y352)	p-CRKII(Y221)	0.0223
p-P70S6K(T421/S424)	p-PI3KP85(Y458)P55(Y199)	0.022292
p-ERBB4(Y1284)	p-STAT3(S727)	0.022177
p-CREB(S133)	p-AKT(S473)	0.022155
p-EGFR(Y1173)	p-FGFR1(Y653/654)	0.022123
p-SYK(Y525/526)	p-PDGFRB(Y1009)	0.021976
p-PYK2(Y402)	p-GAB2(S159)	0.021937
p-PLCG1(Y783)	p-P70S6K(T421/S424)	0.021934
p-FOXO3A(S253)	p-PI3KP85(Y458)P55(Y199)	0.021864
p-ZAP70(Y319)/SYK(Y352)	p-EGFR(Y1086)	0.021843
p-PKCPAN/G(T514)	p-SRC(Y527)	0.021817
p-EGFR(Y1068)	p-FGFR1(Y653/654)	0.021806
p-STAT3(S727)	p-PKCD(T505)	0.021801
p-CREB(S133)	p-P38MAPK(T180/Y182)	0.02178
p-RAF(C-)(S338)	p-JAK1(Y1022/1023)	0.021774
p-IGF1RB(Y1135/1136)/INSRB	p-PKCD(T505)	0.021748
p-EGFR(Y1086)	p-ERBB2(Y1221/1222)	0.021689
p-RAF(C-)(S338)	p-ZAP70(Y319)/SYK(Y352)	0.021655
p-CRKII(Y221)	p-FOXO3A(S253)	0.021552
p-PDGFRB(Y1009)	p-EGFR(Y845)	0.021479
p-STAT3(Y705)	p-MTOR(S2448)	0.021477
p-PDFGRA(Y849)/PDGFRB(Y857)	p-FAK(Y576/577)	0.021426
p-GAB2(S159)	p-RAF(C-)(S259)	0.021425
p-PKCD(T505)	p-GAB1(Y627)	0.021362
p-RAF(C-)(S259)	p-PDK1(S241)	0.02136
p-PLCG1(Y783)	p-PDGFRB(Y1009)	0.021358
p-FOXO3A(S253)	p-CDC2(Y15)	0.021325
p-PYK2(Y402)	p-ERBB2(Y1221/1222)	0.021309
p-PDGFRA(Y754)	p-GAB2(S159)	0.021305
p-PLCG1(Y783)	p-GAB1(Y627)	0.021269
p-STAT1(Y701)	p-ERBB4(Y1284)	0.021224
p-PDGFRA(Y754)	p-STAT3(S727)	0.021157
p-STAT6(Y641)	p-SRC(Y416)	0.021138
p-RAF(C-)(S259)	p-CRKII(Y221)	0.021118
p-FAK(Y576/577)	p-PLCG1(Y783)	0.021042
p-SRC(Y416)	p-MEK(1/2)(S217/221)	0.021036
p-PYK2(Y402)	p-EGFR(Y1068)	0.020994
p-ERBB2(Y1221/1222)	p-EGFR(Y845)	0.020925
p-ZAP70(Y319)/SYK(Y352)	p-PDFGRA(Y849)/PDGFRB(Y857)	0.020878
p-PDGFRB(Y1009)	p-PLCG2(Y759)	0.020872
p-PDFGRA(Y849)/PDGFRB(Y857)	p-ZAP70(Y319)/SYK(Y352)	0.020869
p-PTEN(S380)	p-PDGFRB(Y1009)	0.020861
p-SAPK/JNK(T183/Y185)	p-P90RSK(S380)	0.02085
p-FGFR1(Y653/654)	p-CRKII(Y221)	0.020818
p-SYK(Y525/526)	p-PI3KP85(Y458)P55(Y199)	0.020759
p-ZAP70(Y319)/SYK(Y352)	p-RAF(C-)(S259)	0.02075
p-RAF(C-)(S338)	p-IRS1(S1101)	0.020703
p-STAT1(Y701)	p-MEK(1/2)(S217/221)	0.020691
p-ERBB4(Y1284)	p-PYK2(Y402)	0.020661
p-SRC(Y527)	p-AKT(S473)	0.02063
p-PLCG1(Y783)	p-SYK(Y525/526)	0.020624
p-RAF(C-)(S338)	p-ERBB4(Y1284)	0.020558
p-PDGFRB(Y1009)	p-IRS1(S1101)	0.02055
p-P38MAPK(T180/Y182)	p-PDGFRB(Y1009)	0.02054
p-ERK1/2(T202/Y204)	p-CDC2(Y15)	0.020517
p-JAK1(Y1022/1023)	p-PDK1(S241)	0.0204
p-PDGFRB(Y1009)	p-MTOR(S2448)	0.020341
p-MET(Y1234/1235)	p-GAB2(S159)	0.020307
p-FAK(Y576/577)	p-STAT1(Y701)	0.02028
p-MET(Y1349)	p-IGF1RB(Y1135/1136)/INSRB	0.020257
p-MET(Y1234/1235)	p-KIT(C-)(Y719)	0.020207
p-STAT6(Y641)	p-STAT3(S727)	0.020179
p-PLCG2(Y759)	p-SRC(Y416)	0.020174
p-FAK(Y576/577)	p-STAT3(S727)	0.020117
p-CDC2(Y15)	p-P38MAPK(T180/Y182)	0.020043
p-SRC(Y527)	p-SHP2(Y542)	0.020042
p-STAT3(S727)	p-PDGFRB(Y1009)	0.019918
p-JAK1(Y1022/1023)	p-MET(Y1349)	0.019908
p-PYK2(Y402)	p-JAK1(Y1022/1023)	0.019898
p-ABL(C-)(Y245)	p-FAK(Y576/577)	0.01988
p-SAPK/JNK(T183/Y185)	p-CDC2(Y15)	0.01987
p-STAT3(S727)	p-IRS1(S1101)	0.019866
p-PDFGRA(Y849)/PDGFRB(Y857)	p-STAT3(S727)	0.019854
p-GAB1(Y627)	p-PI3KP85(Y458)P55(Y199)	0.019814
p-MET(Y1349)	p-IRS1(S1101)	0.019788
p-MET(Y1234/1235)	p-PYK2(Y402)	0.01977
p-P38MAPK(T180/Y182)	p-CDK2(T160)	0.01976
p-MET(Y1234/1235)	p-PI3KP85(Y458)P55(Y199)	0.019652
p-ERK1/2(T202/Y204)	p-FOXO1(S319)/FOXO4(S262)	0.019598
p-STAT1(Y701)	p-PDGFRB(Y1009)	0.019563
p-PKCD(T505)	p-FOXO3A(S253)	0.019464
p-STAT1(Y701)	p-MET(Y1234/1235)	0.019425
p-MTOR(S2448)	p-KIT(C-)(Y719)	0.019424
p-RAF(C-)(S338)	p-ABL(C-)(Y245)	0.019421
p-JAK1(Y1022/1023)	p-P90RSK(S380)	0.0194
p-STAT6(Y641)	p-RAF(C-)(S338)	0.019387
p-MTOR(S2448)	p-CRKL(Y207)	0.019356
p-STAT6(Y641)	p-GAB1(Y627)	0.019325
p-SYK(Y525/526)	p-FOXO1(S319)/FOXO4(S262)	0.019323
p-PDK1(S241)	p-CRKII(Y221)	0.019291
p-CRKL(Y207)	p-MEK(1/2)(S217/221)	0.019235
p-FGFR1(Y653/654)	p-PDFGRA(Y849)/PDGFRB(Y857)	0.019211
p-SHC(Y239/240)	p-MET(Y1349)	0.019196
p-RAF(C-)(S259)	p-P70S6K(T421/S424)	0.019138
p-CRKII(Y221)	p-4EBP1(S65)	0.019121
p-SRC(Y527)	p-PDGFRB(Y1009)	0.01911
p-MTOR(S2448)	p-RAF(C-)(S259)	0.019055
p-STAT3(S727)	p-P38MAPK(T180/Y182)	0.019046
p-PKCPAN/G(T514)	p-CREB(S133)	0.018957
p-SYK(Y525/526)	p-ABL(C-)(Y245)	0.018906
p-PDFGRA(Y849)/PDGFRB(Y857)	p-GAB2(S159)	0.018883
p-KIT(C-)(Y719)	p-EGFR(Y845)	0.018837
p-PTEN(S380)	p-STAT3(S727)	0.018831
p-CRKII(Y221)	p-CDC2(Y15)	0.018805
p-JAK1(Y1022/1023)	p-RAF(C-)(S259)	0.018767
p-SHP2(Y542)	p-SRC(Y416)	0.018755
p-STAT3(Y705)	p-GSK3A(S21)	0.018655
p-ZAP70(Y319)/SYK(Y352)	p-STAT1(Y701)	0.018645
p-SHP2(Y542)	p-EGFR(Y1086)	0.01863
p-SRC(Y527)	p-4EBP1(T37/46)	0.018617
p-IRS1(S1101)	p-MTOR(S2448)	0.018592
p-P70S6K(T421/S424)	p-P90RSK(S380)	0.018581
p-FAK(Y576/577)	p-CDK2(T160)	0.018547
p-4EBP1(S65)	p-STAT5(Y694)	0.018441
p-JAK1(Y1022/1023)	p-EGFR(Y1086)	0.018424
p-SRC(Y416)	p-ERBB2(Y1221/1222)	0.018346
p-MET(Y1349)	p-RAF(C-)(S338)	0.018344
p-IRS1(S1101)	p-RAF(C-)(S259)	0.018312
p-EGFR(Y845)	p-FGFR1(Y653/654)	0.018285
p-PKCD(T505)	p-ERK1/2(T202/Y204)	0.018259
p-ERK1/2(T202/Y204)	p-4EBP1(T37/46)	0.018197
p-SRC(Y416)	p-4EBP1(T37/46)	0.01818
p-CRKII(Y221)	p-IGF1RB(Y1135/1136)/INSRB	0.018124
p-AKT(S473)	p-PI3KP85(Y458)P55(Y199)	0.018121
p-PYK2(Y402)	p-EGFR(Y1086)	0.018108
p-PYK2(Y402)	p-SYK(Y525/526)	0.01808
p-CREB(S133)	p-S6RIBPROT(S240/244)	0.018075
p-SRC(Y416)	p-STAT3(Y705)	0.018042
p-FAK(Y576/577)	p-CRKII(Y221)	0.018037
p-PLCG2(Y759)	p-CREB(S133)	0.018024
p-JAK1(Y1022/1023)	p-SYK(Y525/526)	0.018002
p-STAT1(Y701)	p-MET(Y1349)	0.017938
p-MET(Y1234/1235)	p-ERBB4(Y1284)	0.017932
p-S6RIBPROT(S240/244)	p-SRC(Y527)	0.017903
p-S6RIBPROT(S240/244)	p-PDGFRB(Y1009)	0.017866
p-RAF(C-)(S259)	p-FAK(Y576/577)	0.017852
p-STAT6(Y641)	p-MET(Y1234/1235)	0.017852
p-STAT3(Y705)	p-KIT(C-)(Y719)	0.017838
p-PDK1(S241)	p-STAT3(S727)	0.017726
p-PDGFRB(Y1009)	p-S6RIBPROT(S240/244)	0.017655
p-EGFR(Y845)	p-PLCG2(Y759)	0.017648
p-GAB1(Y627)	p-CRKL(Y207)	0.017627
p-FOXO3A(S253)	p-PKCPAN/G(T514)	0.017585
p-STAT3(S727)	p-RAF(C-)(S259)	0.017556
p-RAF(C-)(S338)	p-PKCD(T505)	0.017523
p-STAT1(Y701)	p-SYK(Y525/526)	0.01747
p-ERBB2(Y1221/1222)	p-MET(Y1349)	0.017447
p-MET(Y1234/1235)	p-CRKII(Y221)	0.01744
p-ERBB2(Y1221/1222)	p-STAT1(Y701)	0.017439
p-PDK1(S241)	p-PKCD(T505)	0.017418
p-ERK1/2(T202/Y204)	p-STAT5(Y694)	0.017416
p-FAK(Y576/577)	p-RAF(C-)(S259)	0.017406
p-PYK2(Y402)	p-ERBB4(Y1284)	0.017404
p-SHC(Y239/240)	p-MTOR(S2448)	0.017398
p-IGF1RB(Y1135/1136)/INSRB	p-JAK1(Y1022/1023)	0.017362
p-GAB1(Y627)	p-MET(Y1349)	0.017357
p-EGFR(Y1068)	p-STAT3(Y705)	0.017338
p-ABL(C-)(Y245)	p-ERBB2(Y1221/1222)	0.017325
p-P38MAPK(T180/Y182)	p-AKT(S473)	0.017311
p-PKCPAN/G(T514)	p-4EBP1(S65)	0.017244
p-SRC(Y527)	p-PKCPAN/G(T514)	0.01723
p-PTEN(S380)	p-MEK(1/2)(S217/221)	0.017217
p-ERK1/2(T202/Y204)	p-IGF1RB(Y1135/1136)/INSRB	0.01714
p-GAB1(Y627)	p-SHC(Y239/240)	0.017138
p-EGFR(Y1173)	p-GSK3A(S21)	0.017134
p-SHC(Y239/240)	p-MEK(1/2)(S217/221)	0.01707
p-SRC(Y416)	p-SRC(Y527)	0.017069
p-MEK(1/2)(S217/221)	p-CRKL(Y207)	0.017064
p-SHP2(Y542)	p-SHC(Y239/240)	0.017058
p-STAT6(Y641)	p-FOXO3A(S253)	0.017042
p-PYK2(Y402)	p-MET(Y1234/1235)	0.017029
p-STAT5(Y694)	p-P38MAPK(T180/Y182)	0.017014
p-CRKII(Y221)	p-SYK(Y525/526)	0.016946
p-JAK1(Y1022/1023)	p-FAK(Y576/577)	0.01694
p-STAT3(Y705)	p-EGFR(Y1173)	0.01694
p-4EBP1(T37/46)	p-EGFR(Y1068)	0.016932
p-FAK(Y576/577)	p-RAF(C-)(S338)	0.016918
p-CDC2(Y15)	p-RAF(C-)(S259)	0.016897
p-ERBB4(Y1284)	p-GSK3A(S21)	0.016866
p-PDGFRB(Y1009)	p-PKCD(T505)	0.016835
p-GSK3A(S21)	p-4EBP1(S65)	0.016822
p-CRKL(Y207)	p-P90RSK(S380)	0.016812
p-MTOR(S2448)	p-MEK(1/2)(S217/221)	0.01678
p-P90RSK(S380)	p-IGF1RB(Y1135/1136)/INSRB	0.016757
p-ZAP70(Y319)/SYK(Y352)	p-P90RSK(S380)	0.016756
p-PKCPAN/G(T514)	p-PDK1(S241)	0.016748
p-PDFGRA(Y849)/PDGFRB(Y857)	p-GAB1(Y627)	0.016747
p-RAF(C-)(S259)	p-SAPK/JNK(T183/Y185)	0.016716
p-FAK(Y576/577)	p-CRKL(Y207)	0.016712
p-KIT(C-)(Y719)	p-PLCG2(Y759)	0.016691
p-P90RSK(S380)	p-CDC2(Y15)	0.01669
p-GAB1(Y627)	p-PDGFRA(Y754)	0.016676
p-P90RSK(S380)	p-CDK2(T160)	0.016671
p-JAK1(Y1022/1023)	p-SHC(Y239/240)	0.016611
p-ERK1/2(T202/Y204)	p-PKCD(T505)	0.016587
p-PYK2(Y402)	p-CRKII(Y221)	0.016584
p-CDC2(Y15)	p-PDFGRA(Y849)/PDGFRB(Y857)	0.016551
p-IRS1(S1101)	p-RAF(C-)(S338)	0.016546
p-EGFR(Y845)	p-SYK(Y525/526)	0.016542
p-CDK2(T160)	p-EGFR(Y1068)	0.016515
p-ERK1/2(T202/Y204)	p-PDGFRA(Y754)	0.016499
p-PDK1(S241)	p-FOXO3A(S253)	0.016466
p-AKT(S473)	p-PLCG1(Y783)	0.016465
p-PDFGRA(Y849)/PDGFRB(Y857)	p-ERBB2(Y1221/1222)	0.016431
p-FAK(Y576/577)	p-PKCD(T505)	0.016385
p-FOXO3A(S253)	p-AKT(S473)	0.016355
p-ERK1/2(T202/Y204)	p-MET(Y1349)	0.016343
p-STAT1(Y701)	p-ZAP70(Y319)/SYK(Y352)	0.016324
p-FOXO3A(S253)	p-P70S6K(T421/S424)	0.016318
p-STAT5(Y694)	p-CRKL(Y207)	0.016286
p-GAB2(S159)	p-ABL(C-)(Y245)	0.016262
p-STAT6(Y641)	p-EGFR(Y1068)	0.016254
p-PKCPAN/G(T514)	p-EGFR(Y1068)	0.016253
p-GAB1(Y627)	p-PLCG1(Y783)	0.016214
p-CREB(S133)	p-STAT3(S727)	0.016185
p-STAT5(Y694)	p-EGFR(Y1086)	0.016148
p-GAB2(S159)	p-4EBP1(S65)	0.016108
p-EGFR(Y845)	p-MET(Y1349)	0.0161
p-P90RSK(S380)	p-S6RIBPROT(S240/244)	0.015981
p-SHP2(Y542)	p-STAT5(Y694)	0.01598
p-ERBB2(Y1221/1222)	p-PDFGRA(Y849)/PDGFRB(Y857)	0.015957
p-PKCD(T505)	p-GSK3A(S21)	0.015917
p-EGFR(Y1068)	p-ABL(C-)(Y245)	0.015877
p-SRC(Y527)	p-STAT3(S727)	0.01584
p-MET(Y1234/1235)	p-PDGFRB(Y1009)	0.015821
p-SHP2(Y542)	p-KIT(C-)(Y719)	0.0158
p-EGFR(Y845)	p-EGFR(Y1086)	0.015773
p-PYK2(Y402)	p-KIT(C-)(Y719)	0.015764
p-PDK1(S241)	p-GAB2(S159)	0.015749
p-ERBB2(Y1221/1222)	p-KIT(C-)(Y719)	0.015747
p-SHC(Y239/240)	p-PDGFRB(Y1009)	0.015745
p-PDGFRB(Y1009)	p-GAB2(S159)	0.015725
p-IGF1RB(Y1135/1136)/INSRB	p-P90RSK(S380)	0.015722
p-CDK2(T160)	p-PDK1(S241)	0.015696
p-P70S6K(T421/S424)	p-CRKL(Y207)	0.015691
p-STAT5(Y694)	p-SHP2(Y542)	0.015684
p-MET(Y1349)	p-JAK1(Y1022/1023)	0.01566
p-RAF(C-)(S338)	p-MET(Y1349)	0.015649
p-SHP2(Y542)	p-P90RSK(S380)	0.015619
p-MEK(1/2)(S217/221)	p-PDGFRB(Y1009)	0.015583
p-SHC(Y239/240)	p-P90RSK(S380)	0.015571
p-KIT(C-)(Y719)	p-STAT1(Y701)	0.015568
p-SRC(Y527)	p-S6RIBPROT(S240/244)	0.015563
p-PYK2(Y402)	p-EGFR(Y845)	0.015555
p-FGFR1(Y653/654)	p-CREB(S133)	0.015546
p-CREB(S133)	p-SRC(Y527)	0.015521
p-PDFGRA(Y849)/PDGFRB(Y857)	p-FGFR1(Y653/654)	0.015511
p-EGFR(Y1173)	p-SYK(Y525/526)	0.015505
p-RAF(C-)(S259)	p-IRS1(S1101)	0.015488
p-RAF(C-)(S338)	p-P90RSK(S380)	0.01548
p-PTEN(S380)	p-PDK1(S241)	0.015462
p-ERBB4(Y1284)	p-MET(Y1234/1235)	0.015461
p-GAB1(Y627)	p-4EBP1(T37/46)	0.01543
p-ERBB2(Y1221/1222)	p-P70S6K(T421/S424)	0.015413
p-IRS1(S1101)	p-4EBP1(S65)	0.015399
p-SHP2(Y542)	p-PDGFRA(Y754)	0.015364
p-SHC(Y239/240)	p-CDC2(Y15)	0.01536
p-MET(Y1234/1235)	p-MEK(1/2)(S217/221)	0.015349
p-4EBP1(S65)	p-PDGFRA(Y754)	0.015337
p-PLCG2(Y759)	p-CRKII(Y221)	0.015337
p-PLCG2(Y759)	p-P38MAPK(T180/Y182)	0.01533
p-P70S6K(T421/S424)	p-GSK3A(S21)	0.015322
p-4EBP1(S65)	p-IGF1RB(Y1135/1136)/INSRB	0.015304
p-FGFR1(Y653/654)	p-MET(Y1349)	0.015304
p-KIT(C-)(Y719)	p-FAK(Y576/577)	0.015253
p-FGFR1(Y653/654)	p-PYK2(Y402)	0.015243
p-CDC2(Y15)	p-RAF(C-)(S338)	0.015217
p-CRKL(Y207)	p-STAT3(S727)	0.015178
p-SYK(Y525/526)	p-MET(Y1349)	0.015131
p-FOXO3A(S253)	p-S6RIBPROT(S240/244)	0.015105
p-SAPK/JNK(T183/Y185)	p-ABL(C-)(Y245)	0.015064
p-CDC2(Y15)	p-PDK1(S241)	0.015045
p-PDFGRA(Y849)/PDGFRB(Y857)	p-EGFR(Y1173)	0.014998
p-PLCG2(Y759)	p-PDGFRA(Y754)	0.014992
p-STAT1(Y701)	p-FGFR1(Y653/654)	0.01499
p-SRC(Y527)	p-MEK(1/2)(S217/221)	0.01497
p-FOXO3A(S253)	p-RAF(C-)(S259)	0.014955
p-MEK(1/2)(S217/221)	p-PKCD(T505)	0.014949
p-S6RIBPROT(S240/244)	p-EGFR(Y1068)	0.014941
p-SHC(Y239/240)	p-ERK1/2(T202/Y204)	0.014917
p-GAB1(Y627)	p-EGFR(Y845)	0.014871
p-FAK(Y576/577)	p-SRC(Y416)	0.014859
p-EGFR(Y1068)	p-ERK1/2(T202/Y204)	0.014842
p-GAB1(Y627)	p-SRC(Y416)	0.014826
p-MEK(1/2)(S217/221)	p-SRC(Y527)	0.014794
p-JAK1(Y1022/1023)	p-STAT5(Y694)	0.014774
p-CDC2(Y15)	p-EGFR(Y1086)	0.014768
p-PDGFRB(Y1009)	p-MET(Y1234/1235)	0.014765
p-4EBP1(T37/46)	p-SHP2(Y542)	0.014742
p-SYK(Y525/526)	p-MEK(1/2)(S217/221)	0.014727
p-RAF(C-)(S338)	p-IGF1RB(Y1135/1136)/INSRB	0.014711
p-PI3KP85(Y458)P55(Y199)	p-SYK(Y525/526)	0.01471
p-ZAP70(Y319)/SYK(Y352)	p-CDC2(Y15)	0.014663
p-JAK1(Y1022/1023)	p-STAT3(S727)	0.014658
p-GAB1(Y627)	p-ERK1/2(T202/Y204)	0.014621
p-RAF(C-)(S259)	p-MET(Y1349)	0.014601
p-AKT(S473)	p-SRC(Y527)	0.014578
p-RAF(C-)(S338)	p-4EBP1(S65)	0.014548
p-RAF(C-)(S338)	p-CDC2(Y15)	0.014543
p-PDGFRA(Y754)	p-EGFR(Y1068)	0.014507
p-EGFR(Y845)	p-PDGFRA(Y754)	0.014497
p-PDGFRA(Y754)	p-GSK3A(S21)	0.014463
p-MET(Y1349)	p-ZAP70(Y319)/SYK(Y352)	0.014434
p-STAT5(Y694)	p-EGFR(Y845)	0.014427
p-RAF(C-)(S338)	p-STAT3(Y705)	0.014425
p-RAF(C-)(S259)	p-STAT3(Y705)	0.014418
p-PDGFRB(Y1009)	p-PDFGRA(Y849)/PDGFRB(Y857)	0.014417
p-ERBB2(Y1221/1222)	p-MTOR(S2448)	0.01441
p-MET(Y1349)	p-SRC(Y416)	0.014351
p-EGFR(Y1086)	p-JAK1(Y1022/1023)	0.014344
p-RAF(C-)(S259)	p-FOXO3A(S253)	0.014324
p-MET(Y1349)	p-4EBP1(T37/46)	0.014318
p-MET(Y1234/1235)	p-JAK1(Y1022/1023)	0.014261
p-CDC2(Y15)	p-CRKII(Y221)	0.014247
p-IGF1RB(Y1135/1136)/INSRB	p-RAF(C-)(S338)	0.01423
p-STAT6(Y641)	p-GSK3A(S21)	0.014224
p-PYK2(Y402)	p-P38MAPK(T180/Y182)	0.014211
p-PI3KP85(Y458)P55(Y199)	p-PTEN(S380)	0.014204
p-ERBB2(Y1221/1222)	p-FOXO1(S319)/FOXO4(S262)	0.014192
p-CRKII(Y221)	p-PDGFRA(Y754)	0.01419
p-FOXO1(S319)/FOXO4(S262)	p-P90RSK(S380)	0.014162
p-PDFGRA(Y849)/PDGFRB(Y857)	p-P38MAPK(T180/Y182)	0.014156
p-FGFR1(Y653/654)	p-MTOR(S2448)	0.014131
p-FOXO3A(S253)	p-P90RSK(S380)	0.014121
p-EGFR(Y1173)	p-IGF1RB(Y1135/1136)/INSRB	0.014102
p-CDC2(Y15)	p-CDK2(T160)	0.014101
p-GSK3A(S21)	p-P90RSK(S380)	0.014063
p-ABL(C-)(Y245)	p-P70S6K(T421/S424)	0.014057
p-PLCG1(Y783)	p-GAB2(S159)	0.014037
p-P38MAPK(T180/Y182)	p-PTEN(S380)	0.013997
p-P70S6K(T421/S424)	p-CRKII(Y221)	0.013996
p-P90RSK(S380)	p-GAB1(Y627)	0.013924
p-S6RIBPROT(S240/244)	p-CRKII(Y221)	0.013924
p-CREB(S133)	p-PDGFRB(Y1009)	0.01392
p-PDFGRA(Y849)/PDGFRB(Y857)	p-MEK(1/2)(S217/221)	0.013885
p-MET(Y1349)	p-SHC(Y239/240)	0.013841
p-SYK(Y525/526)	p-STAT5(Y694)	0.013793
p-KIT(C-)(Y719)	p-EGFR(Y1086)	0.013782
p-CREB(S133)	p-PLCG1(Y783)	0.013759
p-EGFR(Y1086)	p-PDFGRA(Y849)/PDGFRB(Y857)	0.013697
p-IRS1(S1101)	p-FOXO3A(S253)	0.013696
p-CRKII(Y221)	p-ABL(C-)(Y245)	0.013692
p-MET(Y1234/1235)	p-CREB(S133)	0.013679
p-STAT1(Y701)	p-4EBP1(T37/46)	0.013674
p-SHP2(Y542)	p-EGFR(Y1173)	0.013655
p-FGFR1(Y653/654)	p-4EBP1(S65)	0.013507
p-SHP2(Y542)	p-S6RIBPROT(S240/244)	0.01349
p-PYK2(Y402)	p-FAK(Y576/577)	0.013467
p-EGFR(Y1173)	p-ERK1/2(T202/Y204)	0.013459
p-EGFR(Y845)	p-KIT(C-)(Y719)	0.01345
p-FAK(Y576/577)	p-GAB2(S159)	0.013447
p-FOXO1(S319)/FOXO4(S262)	p-EGFR(Y845)	0.013419
p-ERBB2(Y1221/1222)	p-IGF1RB(Y1135/1136)/INSRB	0.013418
p-PKCPAN/G(T514)	p-P38MAPK(T180/Y182)	0.013415
p-PDGFRB(Y1009)	p-P90RSK(S380)	0.013414
p-PDGFRB(Y1009)	p-IGF1RB(Y1135/1136)/INSRB	0.013403
p-4EBP1(S65)	p-GSK3A(S21)	0.013381
p-PI3KP85(Y458)P55(Y199)	p-ERBB2(Y1221/1222)	0.013378
p-IRS1(S1101)	p-STAT3(S727)	0.013353
p-PDFGRA(Y849)/PDGFRB(Y857)	p-IGF1RB(Y1135/1136)/INSRB	0.013293
p-RAF(C-)(S259)	p-MTOR(S2448)	0.013281
p-PDGFRB(Y1009)	p-4EBP1(T37/46)	0.01327
p-CRKL(Y207)	p-4EBP1(T37/46)	0.013232
p-AKT(S473)	p-4EBP1(S65)	0.01323
p-MET(Y1234/1235)	p-4EBP1(T37/46)	0.013181
p-SHP2(Y542)	p-EGFR(Y845)	0.013175
p-PTEN(S380)	p-P70S6K(T421/S424)	0.013149
p-JAK1(Y1022/1023)	p-CDC2(Y15)	0.013098
p-PDGFRB(Y1009)	p-FOXO3A(S253)	0.013087
p-MET(Y1349)	p-RAF(C-)(S259)	0.013072
p-SHP2(Y542)	p-GAB2(S159)	0.013043
p-P70S6K(T421/S424)	p-PTEN(S380)	0.013022
p-GAB2(S159)	p-SHP2(Y542)	0.012992
p-ZAP70(Y319)/SYK(Y352)	p-PYK2(Y402)	0.012984
p-STAT6(Y641)	p-PLCG1(Y783)	0.012964
p-ZAP70(Y319)/SYK(Y352)	p-STAT5(Y694)	0.012947
p-KIT(C-)(Y719)	p-MEK(1/2)(S217/221)	0.012923
p-STAT3(S727)	p-CRKL(Y207)	0.012914
p-EGFR(Y1173)	p-PLCG2(Y759)	0.012914
p-KIT(C-)(Y719)	p-4EBP1(T37/46)	0.012896
p-MET(Y1234/1235)	p-SHP2(Y542)	0.012889
p-JAK1(Y1022/1023)	p-STAT6(Y641)	0.012863
p-PDGFRB(Y1009)	p-EGFR(Y1173)	0.012859
p-PDGFRB(Y1009)	p-STAT6(Y641)	0.012859
p-KIT(C-)(Y719)	p-FGFR1(Y653/654)	0.012857
p-FGFR1(Y653/654)	p-RAF(C-)(S338)	0.012838
p-CRKII(Y221)	p-PYK2(Y402)	0.012817
p-STAT5(Y694)	p-CDC2(Y15)	0.012723
p-FAK(Y576/577)	p-IGF1RB(Y1135/1136)/INSRB	0.01272
p-PYK2(Y402)	p-PDGFRA(Y754)	0.012713
p-GAB1(Y627)	p-PKCD(T505)	0.012691
p-SAPK/JNK(T183/Y185)	p-GAB2(S159)	0.012679
p-STAT6(Y641)	p-EGFR(Y1173)	0.012663
p-MET(Y1234/1235)	p-FOXO1(S319)/FOXO4(S262)	0.012641
p-MEK(1/2)(S217/221)	p-MTOR(S2448)	0.012624
p-P90RSK(S380)	p-4EBP1(T37/46)	0.012617
p-MET(Y1349)	p-GAB2(S159)	0.012607
p-PLCG1(Y783)	p-CRKL(Y207)	0.0126
p-CREB(S133)	p-PKCPAN/G(T514)	0.012597
p-PLCG2(Y759)	p-MET(Y1349)	0.01259
p-RAF(C-)(S259)	p-STAT3(S727)	0.012589
p-PLCG2(Y759)	p-PI3KP85(Y458)P55(Y199)	0.012583
p-FGFR1(Y653/654)	p-GAB1(Y627)	0.012579
p-STAT3(Y705)	p-SHC(Y239/240)	0.012529
p-IRS1(S1101)	p-ZAP70(Y319)/SYK(Y352)	0.012488
p-CDC2(Y15)	p-P90RSK(S380)	0.012474
p-STAT3(S727)	p-S6RIBPROT(S240/244)	0.01241
p-KIT(C-)(Y719)	p-SRC(Y416)	0.012407
p-P70S6K(T421/S424)	p-RAF(C-)(S338)	0.012385
p-PDFGRA(Y849)/PDGFRB(Y857)	p-STAT3(Y705)	0.012379
p-ERBB4(Y1284)	p-IRS1(S1101)	0.012361
p-SRC(Y416)	p-SHC(Y239/240)	0.012338
p-ABL(C-)(Y245)	p-ERBB4(Y1284)	0.01233
p-MEK(1/2)(S217/221)	p-GAB1(Y627)	0.0123
p-EGFR(Y1068)	p-KIT(C-)(Y719)	0.012282
p-CDC2(Y15)	p-4EBP1(T37/46)	0.012275
p-EGFR(Y845)	p-4EBP1(T37/46)	0.012216
p-ERK1/2(T202/Y204)	p-PTEN(S380)	0.012213
p-PDGFRA(Y754)	p-JAK1(Y1022/1023)	0.012196
p-EGFR(Y845)	p-ERBB2(Y1221/1222)	0.012195
p-MET(Y1349)	p-PDK1(S241)	0.012176
p-SHC(Y239/240)	p-FOXO3A(S253)	0.012152
p-4EBP1(S65)	p-MET(Y1349)	0.012143
p-GSK3A(S21)	p-STAT3(S727)	0.012138
p-EGFR(Y1068)	p-PYK2(Y402)	0.012128
p-MEK(1/2)(S217/221)	p-ZAP70(Y319)/SYK(Y352)	0.012127
p-EGFR(Y1173)	p-EGFR(Y1086)	0.012124
p-FOXO3A(S253)	p-SHC(Y239/240)	0.012094
p-CDK2(T160)	p-ERK1/2(T202/Y204)	0.012062
p-EGFR(Y1068)	p-PLCG2(Y759)	0.01206
p-MEK(1/2)(S217/221)	p-CREB(S133)	0.012048
p-PLCG1(Y783)	p-PLCG2(Y759)	0.012033
p-PDFGRA(Y849)/PDGFRB(Y857)	p-SAPK/JNK(T183/Y185)	0.012009
p-EGFR(Y1173)	p-MEK(1/2)(S217/221)	0.011971
p-CDK2(T160)	p-P90RSK(S380)	0.011966
p-PDFGRA(Y849)/PDGFRB(Y857)	p-RAF(C-)(S338)	0.011918
p-ZAP70(Y319)/SYK(Y352)	p-MET(Y1349)	0.011916
p-IRS1(S1101)	p-CRKII(Y221)	0.011896
p-PLCG2(Y759)	p-PKCD(T505)	0.011862
p-SYK(Y525/526)	p-P70S6K(T421/S424)	0.011821
p-FGFR1(Y653/654)	p-CRKL(Y207)	0.011801
p-STAT3(Y705)	p-SRC(Y527)	0.011776
p-SYK(Y525/526)	p-MTOR(S2448)	0.011771
p-STAT5(Y694)	p-FGFR1(Y653/654)	0.011742
p-PYK2(Y402)	p-4EBP1(S65)	0.011738
p-PDGFRA(Y754)	p-MET(Y1349)	0.011734
p-MET(Y1234/1235)	p-STAT6(Y641)	0.011723
p-P90RSK(S380)	p-CRKII(Y221)	0.011723
p-MTOR(S2448)	p-ERK1/2(T202/Y204)	0.011713
p-EGFR(Y1068)	p-PTEN(S380)	0.011707
p-GAB2(S159)	p-MET(Y1349)	0.011667
p-CRKII(Y221)	p-STAT3(Y705)	0.011657
p-FAK(Y576/577)	p-PTEN(S380)	0.011651
p-PKCPAN/G(T514)	p-ERK1/2(T202/Y204)	0.011627
p-RAF(C-)(S338)	p-ERBB2(Y1221/1222)	0.011614
p-RAF(C-)(S338)	p-ERK1/2(T202/Y204)	0.011613
p-CDC2(Y15)	p-JAK1(Y1022/1023)	0.011592
p-JAK1(Y1022/1023)	p-EGFR(Y845)	0.011583
p-RAF(C-)(S259)	p-ERBB4(Y1284)	0.011578
p-AKT(S473)	p-ERK1/2(T202/Y204)	0.011576
p-MTOR(S2448)	p-CREB(S133)	0.011564
p-KIT(C-)(Y719)	p-CRKL(Y207)	0.011564
p-CRKII(Y221)	p-P38MAPK(T180/Y182)	0.011551
p-MET(Y1234/1235)	p-PDGFRA(Y754)	0.011544
p-FAK(Y576/577)	p-SHP2(Y542)	0.011474
p-4EBP1(S65)	p-ZAP70(Y319)/SYK(Y352)	0.011458
p-CDC2(Y15)	p-SAPK/JNK(T183/Y185)	0.011454
p-ABL(C-)(Y245)	p-MTOR(S2448)	0.011442
p-STAT1(Y701)	p-PKCD(T505)	0.011434
p-IRS1(S1101)	p-JAK1(Y1022/1023)	0.011427
p-PDFGRA(Y849)/PDGFRB(Y857)	p-SHC(Y239/240)	0.011425
p-CRKL(Y207)	p-MET(Y1349)	0.011417
p-CRKII(Y221)	p-FAK(Y576/577)	0.011411
p-ZAP70(Y319)/SYK(Y352)	p-GAB2(S159)	0.01141
p-S6RIBPROT(S240/244)	p-PDK1(S241)	0.011405
p-PYK2(Y402)	p-PI3KP85(Y458)P55(Y199)	0.011404
p-SRC(Y416)	p-STAT6(Y641)	0.011387
p-GSK3A(S21)	p-PKCD(T505)	0.011361
p-EGFR(Y845)	p-PYK2(Y402)	0.011316
p-FOXO3A(S253)	p-IRS1(S1101)	0.011307
p-PTEN(S380)	p-MET(Y1349)	0.011306
p-PLCG2(Y759)	p-IGF1RB(Y1135/1136)/INSRB	0.011303
p-4EBP1(S65)	p-EGFR(Y1086)	0.011301
p-PKCPAN/G(T514)	p-SAPK/JNK(T183/Y185)	0.011288
p-ZAP70(Y319)/SYK(Y352)	p-EGFR(Y845)	0.011283
p-STAT6(Y641)	p-IGF1RB(Y1135/1136)/INSRB	0.011265
p-ERBB2(Y1221/1222)	p-GSK3A(S21)	0.011241
p-STAT6(Y641)	p-P38MAPK(T180/Y182)	0.011222
p-STAT6(Y641)	p-PDK1(S241)	0.011207
p-GSK3A(S21)	p-PDGFRA(Y754)	0.011192
p-PI3KP85(Y458)P55(Y199)	p-GAB1(Y627)	0.011185
p-EGFR(Y1086)	p-4EBP1(T37/46)	0.011163
p-JAK1(Y1022/1023)	p-P70S6K(T421/S424)	0.011162
p-PLCG1(Y783)	p-STAT3(Y705)	0.011158
p-EGFR(Y1068)	p-FAK(Y576/577)	0.01115
p-PYK2(Y402)	p-MET(Y1349)	0.011149
p-STAT1(Y701)	p-IGF1RB(Y1135/1136)/INSRB	0.011148
p-PKCPAN/G(T514)	p-4EBP1(T37/46)	0.011138
p-RAF(C-)(S259)	p-SRC(Y527)	0.011132
p-PYK2(Y402)	p-SAPK/JNK(T183/Y185)	0.011131
p-P38MAPK(T180/Y182)	p-SAPK/JNK(T183/Y185)	0.01113
p-RAF(C-)(S338)	p-CDK2(T160)	0.011126
p-MTOR(S2448)	p-FAK(Y576/577)	0.011116
p-PLCG2(Y759)	p-CRKL(Y207)	0.011113
p-PDGFRA(Y754)	p-SHC(Y239/240)	0.011109
p-GAB2(S159)	p-PDGFRA(Y754)	0.011104
p-ERK1/2(T202/Y204)	p-GAB1(Y627)	0.011084
p-GAB1(Y627)	p-P38MAPK(T180/Y182)	0.011056
p-MET(Y1349)	p-4EBP1(S65)	0.011034
p-CREB(S133)	p-MET(Y1349)	0.01102
p-PDK1(S241)	p-IRS1(S1101)	0.011017
p-PLCG1(Y783)	p-MET(Y1349)	0.011015
p-GAB1(Y627)	p-PLCG2(Y759)	0.011015
p-MEK(1/2)(S217/221)	p-PI3KP85(Y458)P55(Y199)	0.010983
p-ZAP70(Y319)/SYK(Y352)	p-4EBP1(T37/46)	0.010978
p-SRC(Y416)	p-STAT5(Y694)	0.01097
p-P90RSK(S380)	p-PDGFRA(Y754)	0.010962
p-EGFR(Y845)	p-ERK1/2(T202/Y204)	0.010961
p-PDGFRA(Y754)	p-ZAP70(Y319)/SYK(Y352)	0.010929
p-ERBB4(Y1284)	p-SHC(Y239/240)	0.010924
p-4EBP1(S65)	p-SRC(Y416)	0.010922
p-FGFR1(Y653/654)	p-RAF(C-)(S259)	0.010906
p-P90RSK(S380)	p-SHC(Y239/240)	0.010899
p-JAK1(Y1022/1023)	p-MET(Y1234/1235)	0.010887
p-ERBB2(Y1221/1222)	p-FOXO3A(S253)	0.010885
p-ERBB2(Y1221/1222)	p-PI3KP85(Y458)P55(Y199)	0.010873
p-ABL(C-)(Y245)	p-4EBP1(T37/46)	0.010871
p-SHP2(Y542)	p-P70S6K(T421/S424)	0.010867
p-KIT(C-)(Y719)	p-SHP2(Y542)	0.010845
p-GAB2(S159)	p-FOXO1(S319)/FOXO4(S262)	0.010839
p-STAT3(S727)	p-SRC(Y527)	0.010836
p-CDK2(T160)	p-MTOR(S2448)	0.010831
p-EGFR(Y1068)	p-CDC2(Y15)	0.010827
p-MEK(1/2)(S217/221)	p-MET(Y1349)	0.010821
p-GAB2(S159)	p-4EBP1(T37/46)	0.01081
p-SHP2(Y542)	p-CREB(S133)	0.010796
p-PDGFRA(Y754)	p-PDK1(S241)	0.010794
p-STAT3(Y705)	p-SHP2(Y542)	0.01079
p-MET(Y1234/1235)	p-ABL(C-)(Y245)	0.010777
p-SYK(Y525/526)	p-PDGFRA(Y754)	0.010772
p-AKT(S473)	p-PDGFRB(Y1009)	0.010765
p-P90RSK(S380)	p-PDK1(S241)	0.010759
p-KIT(C-)(Y719)	p-SHC(Y239/240)	0.010729
p-STAT1(Y701)	p-PLCG1(Y783)	0.010723
p-EGFR(Y1173)	p-4EBP1(T37/46)	0.010699
p-ABL(C-)(Y245)	p-STAT3(Y705)	0.010686
p-SHP2(Y542)	p-EGFR(Y1068)	0.010679
p-S6RIBPROT(S240/244)	p-PLCG1(Y783)	0.010671
p-RAF(C-)(S338)	p-GAB2(S159)	0.010663
p-ERBB4(Y1284)	p-KIT(C-)(Y719)	0.010659
p-KIT(C-)(Y719)	p-P38MAPK(T180/Y182)	0.010652
p-STAT5(Y694)	p-CDK2(T160)	0.010648
p-4EBP1(S65)	p-CDK2(T160)	0.010624
p-STAT3(S727)	p-MTOR(S2448)	0.010621
p-ABL(C-)(Y245)	p-SHP2(Y542)	0.01061
p-PDFGRA(Y849)/PDGFRB(Y857)	p-EGFR(Y845)	0.010598
p-SHP2(Y542)	p-PLCG1(Y783)	0.010595
p-CDC2(Y15)	p-ERBB4(Y1284)	0.010593
p-AKT(S473)	p-PTEN(S380)	0.010582
p-GAB2(S159)	p-CRKL(Y207)	0.01058
p-S6RIBPROT(S240/244)	p-PTEN(S380)	0.010576
p-ABL(C-)(Y245)	p-GAB2(S159)	0.010576
p-P90RSK(S380)	p-CRKL(Y207)	0.010567
p-4EBP1(T37/46)	p-PDGFRA(Y754)	0.010564
p-STAT1(Y701)	p-STAT3(Y705)	0.010563
p-EGFR(Y1068)	p-STAT1(Y701)	0.010538
p-EGFR(Y1068)	p-SYK(Y525/526)	0.010533
p-CREB(S133)	p-P90RSK(S380)	0.010525
p-MET(Y1234/1235)	p-STAT1(Y701)	0.010494
p-SHP2(Y542)	p-SYK(Y525/526)	0.01049
p-CDC2(Y15)	p-SHP2(Y542)	0.010474
p-CRKII(Y221)	p-GAB1(Y627)	0.010473
p-IRS1(S1101)	p-PDK1(S241)	0.010461
p-PKCD(T505)	p-MTOR(S2448)	0.010431
p-EGFR(Y1173)	p-STAT3(Y705)	0.010423
p-PI3KP85(Y458)P55(Y199)	p-MET(Y1234/1235)	0.010402
p-PDGFRB(Y1009)	p-MET(Y1349)	0.01039
p-P70S6K(T421/S424)	p-PLCG1(Y783)	0.010387
p-SHP2(Y542)	p-ZAP70(Y319)/SYK(Y352)	0.010378
p-PYK2(Y402)	p-STAT3(S727)	0.010366
p-PDFGRA(Y849)/PDGFRB(Y857)	p-PDK1(S241)	0.010366
p-SYK(Y525/526)	p-SAPK/JNK(T183/Y185)	0.010341
p-STAT3(Y705)	p-4EBP1(S65)	0.010341
p-GSK3A(S21)	p-ABL(C-)(Y245)	0.010326
p-SRC(Y416)	p-CRKL(Y207)	0.010325
p-EGFR(Y1068)	p-4EBP1(S65)	0.010318
p-ERK1/2(T202/Y204)	p-P38MAPK(T180/Y182)	0.010317
p-SAPK/JNK(T183/Y185)	p-STAT3(S727)	0.010287
p-SAPK/JNK(T183/Y185)	p-P38MAPK(T180/Y182)	0.010274
p-PKCPAN/G(T514)	p-STAT5(Y694)	0.010256
p-CRKII(Y221)	p-MET(Y1234/1235)	0.010235
p-PDGFRA(Y754)	p-EGFR(Y1086)	0.010193
p-SRC(Y416)	p-PLCG1(Y783)	0.010192
p-MET(Y1234/1235)	p-IGF1RB(Y1135/1136)/INSRB	0.010191
p-FAK(Y576/577)	p-MET(Y1349)	0.01018
p-PI3KP85(Y458)P55(Y199)	p-FOXO1(S319)/FOXO4(S262)	0.010175
p-PDGFRA(Y754)	p-STAT5(Y694)	0.010148
p-P38MAPK(T180/Y182)	p-IGF1RB(Y1135/1136)/INSRB	0.010119
p-GSK3A(S21)	p-4EBP1(T37/46)	0.010117
p-EGFR(Y1068)	p-SHC(Y239/240)	0.010112
p-P90RSK(S380)	p-RAF(C-)(S338)	0.010096
p-PDFGRA(Y849)/PDGFRB(Y857)	p-KIT(C-)(Y719)	0.010091
p-IGF1RB(Y1135/1136)/INSRB	p-CDC2(Y15)	0.010079
p-FOXO1(S319)/FOXO4(S262)	p-SAPK/JNK(T183/Y185)	0.010078
p-FOXO1(S319)/FOXO4(S262)	p-CDK2(T160)	0.010064
p-EGFR(Y1086)	p-GAB2(S159)	0.010022
p-PKCPAN/G(T514)	p-KIT(C-)(Y719)	0.010013
p-CDK2(T160)	p-ABL(C-)(Y245)	0.01
p-SHP2(Y542)	p-AKT(S473)	0.009988
p-SHC(Y239/240)	p-CDK2(T160)	0.009987
p-4EBP1(T37/46)	p-MET(Y1349)	0.009986
p-CRKII(Y221)	p-CDK2(T160)	0.00998
p-PKCPAN/G(T514)	p-PDGFRB(Y1009)	0.009973
p-ERBB2(Y1221/1222)	p-CDC2(Y15)	0.009958
p-MTOR(S2448)	p-GAB2(S159)	0.009949
p-SYK(Y525/526)	p-IGF1RB(Y1135/1136)/INSRB	0.009948
p-P90RSK(S380)	p-GAB2(S159)	0.009939
p-STAT1(Y701)	p-SHC(Y239/240)	0.009932
p-PI3KP85(Y458)P55(Y199)	p-CRKII(Y221)	0.009918
p-EGFR(Y1173)	p-PYK2(Y402)	0.009908
p-SRC(Y416)	p-CDK2(T160)	0.009906
p-SHP2(Y542)	p-JAK1(Y1022/1023)	0.009898
p-SRC(Y527)	p-GAB2(S159)	0.009898
p-MET(Y1234/1235)	p-RAF(C-)(S338)	0.009882
p-RAF(C-)(S338)	p-STAT3(S727)	0.00988
p-ZAP70(Y319)/SYK(Y352)	p-MEK(1/2)(S217/221)	0.009859
p-CREB(S133)	p-ERK1/2(T202/Y204)	0.009848
p-STAT6(Y641)	p-CRKL(Y207)	0.009846
p-ZAP70(Y319)/SYK(Y352)	p-ABL(C-)(Y245)	0.00984
p-CRKL(Y207)	p-STAT5(Y694)	0.009832
p-AKT(S473)	p-STAT3(S727)	0.009827
p-CRKII(Y221)	p-EGFR(Y845)	0.009813
p-PLCG1(Y783)	p-S6RIBPROT(S240/244)	0.009809
p-AKT(S473)	p-P38MAPK(T180/Y182)	0.009805
p-SHP2(Y542)	p-4EBP1(S65)	0.009803
p-AKT(S473)	p-EGFR(Y845)	0.009797
p-EGFR(Y845)	p-PI3KP85(Y458)P55(Y199)	0.009794
p-GAB1(Y627)	p-MET(Y1234/1235)	0.009794
p-MTOR(S2448)	p-SRC(Y527)	0.009789
p-SHP2(Y542)	p-CDK2(T160)	0.009784
p-FOXO1(S319)/FOXO4(S262)	p-MEK(1/2)(S217/221)	0.009776
p-SRC(Y416)	p-ERBB4(Y1284)	0.009766
p-GAB2(S159)	p-CREB(S133)	0.009763
p-FAK(Y576/577)	p-PI3KP85(Y458)P55(Y199)	0.009742
p-SRC(Y527)	p-ABL(C-)(Y245)	0.009739
p-PKCPAN/G(T514)	p-PLCG1(Y783)	0.009737
p-STAT1(Y701)	p-P70S6K(T421/S424)	0.009733
p-SRC(Y416)	p-PDK1(S241)	0.009727
p-STAT1(Y701)	p-P90RSK(S380)	0.009665
p-ABL(C-)(Y245)	p-SHC(Y239/240)	0.009663
p-PDFGRA(Y849)/PDGFRB(Y857)	p-PI3KP85(Y458)P55(Y199)	0.009654
p-PDFGRA(Y849)/PDGFRB(Y857)	p-MET(Y1349)	0.009631
p-JAK1(Y1022/1023)	p-ABL(C-)(Y245)	0.009618
p-ERBB2(Y1221/1222)	p-PTEN(S380)	0.009613
p-STAT3(Y705)	p-IGF1RB(Y1135/1136)/INSRB	0.009611
p-SRC(Y416)	p-FAK(Y576/577)	0.00961
p-GSK3A(S21)	p-MET(Y1349)	0.009595
p-STAT3(S727)	p-CDC2(Y15)	0.009588
p-PTEN(S380)	p-SHP2(Y542)	0.009575
p-MTOR(S2448)	p-PDFGRA(Y849)/PDGFRB(Y857)	0.009537
p-EGFR(Y1068)	p-RAF(C-)(S338)	0.009536
p-P90RSK(S380)	p-MET(Y1349)	0.009532
p-S6RIBPROT(S240/244)	p-4EBP1(S65)	0.009524
p-STAT6(Y641)	p-RAF(C-)(S259)	0.009521
p-PI3KP85(Y458)P55(Y199)	p-STAT3(S727)	0.009506
p-GSK3A(S21)	p-SHC(Y239/240)	0.009506
p-PDFGRA(Y849)/PDGFRB(Y857)	p-CRKII(Y221)	0.009503
p-P70S6K(T421/S424)	p-4EBP1(S65)	0.009497
p-ERBB2(Y1221/1222)	p-4EBP1(T37/46)	0.009496
p-ABL(C-)(Y245)	p-FOXO3A(S253)	0.00949
p-SRC(Y416)	p-KIT(C-)(Y719)	0.009489
p-S6RIBPROT(S240/244)	p-STAT3(S727)	0.009485
p-ABL(C-)(Y245)	p-FOXO1(S319)/FOXO4(S262)	0.009473
p-PKCD(T505)	p-RAF(C-)(S259)	0.009473
p-ERK1/2(T202/Y204)	p-EGFR(Y1086)	0.009454
p-KIT(C-)(Y719)	p-SYK(Y525/526)	0.009438
p-PDFGRA(Y849)/PDGFRB(Y857)	p-P90RSK(S380)	0.009414
p-MTOR(S2448)	p-IRS1(S1101)	0.009413
p-IRS1(S1101)	p-P90RSK(S380)	0.009413
p-SRC(Y416)	p-PI3KP85(Y458)P55(Y199)	0.009411
p-ABL(C-)(Y245)	p-CREB(S133)	0.009406
p-STAT3(S727)	p-SAPK/JNK(T183/Y185)	0.009381
p-GSK3A(S21)	p-JAK1(Y1022/1023)	0.00937
p-EGFR(Y845)	p-ZAP70(Y319)/SYK(Y352)	0.00937
p-ERK1/2(T202/Y204)	p-PDFGRA(Y849)/PDGFRB(Y857)	0.00936
p-SHP2(Y542)	p-ABL(C-)(Y245)	0.00936
p-KIT(C-)(Y719)	p-EGFR(Y1068)	0.009335
p-CRKII(Y221)	p-MET(Y1349)	0.00933
p-CRKII(Y221)	p-STAT1(Y701)	0.009319
p-MEK(1/2)(S217/221)	p-SAPK/JNK(T183/Y185)	0.009315
p-CDK2(T160)	p-4EBP1(T37/46)	0.009313
p-EGFR(Y1086)	p-IGF1RB(Y1135/1136)/INSRB	0.009311
p-GAB1(Y627)	p-STAT3(S727)	0.009298
p-EGFR(Y1086)	p-SHC(Y239/240)	0.009293
p-CDC2(Y15)	p-ABL(C-)(Y245)	0.00929
p-S6RIBPROT(S240/244)	p-PKCD(T505)	0.009264
p-GAB1(Y627)	p-P70S6K(T421/S424)	0.009258
p-CREB(S133)	p-MEK(1/2)(S217/221)	0.009233
p-CDC2(Y15)	p-MET(Y1349)	0.009223
p-P90RSK(S380)	p-IRS1(S1101)	0.009218
p-FGFR1(Y653/654)	p-P70S6K(T421/S424)	0.009217
p-GAB2(S159)	p-PDK1(S241)	0.009214
p-FGFR1(Y653/654)	p-IGF1RB(Y1135/1136)/INSRB	0.009209
p-CRKII(Y221)	p-SAPK/JNK(T183/Y185)	0.009203
p-PLCG1(Y783)	p-ERBB2(Y1221/1222)	0.009183
p-MTOR(S2448)	p-4EBP1(T37/46)	0.009168
p-EGFR(Y1086)	p-GSK3A(S21)	0.009168
p-KIT(C-)(Y719)	p-EGFR(Y1173)	0.009156
p-ERBB4(Y1284)	p-PKCD(T505)	0.009139
p-PDGFRA(Y754)	p-RAF(C-)(S338)	0.009126
p-FAK(Y576/577)	p-4EBP1(T37/46)	0.009123
p-P70S6K(T421/S424)	p-RAF(C-)(S259)	0.009106
p-PKCD(T505)	p-CRKII(Y221)	0.009091
p-ERBB4(Y1284)	p-IGF1RB(Y1135/1136)/INSRB	0.009088
p-PKCD(T505)	p-SAPK/JNK(T183/Y185)	0.009082
p-GAB2(S159)	p-P70S6K(T421/S424)	0.009074
p-PDK1(S241)	p-CDC2(Y15)	0.009072
p-GAB2(S159)	p-FOXO3A(S253)	0.00907
p-S6RIBPROT(S240/244)	p-FOXO3A(S253)	0.009068
p-SRC(Y527)	p-FOXO1(S319)/FOXO4(S262)	0.009059
p-SHP2(Y542)	p-FGFR1(Y653/654)	0.009046
p-STAT5(Y694)	p-ERK1/2(T202/Y204)	0.009001
p-PI3KP85(Y458)P55(Y199)	p-PKCD(T505)	0.009
p-GAB2(S159)	p-CDK2(T160)	0.00897
p-RAF(C-)(S259)	p-SHC(Y239/240)	0.008966
p-PTEN(S380)	p-IGF1RB(Y1135/1136)/INSRB	0.008966
p-ERBB2(Y1221/1222)	p-STAT5(Y694)	0.008964
p-GSK3A(S21)	p-P70S6K(T421/S424)	0.008959
p-RAF(C-)(S338)	p-SHP2(Y542)	0.008946
p-ABL(C-)(Y245)	p-CDC2(Y15)	0.008944
p-STAT6(Y641)	p-CREB(S133)	0.008943
p-STAT6(Y641)	p-4EBP1(T37/46)	0.008942
p-CREB(S133)	p-4EBP1(T37/46)	0.008941
p-CDK2(T160)	p-RAF(C-)(S338)	0.008934
p-MTOR(S2448)	p-IGF1RB(Y1135/1136)/INSRB	0.008934
p-ERK1/2(T202/Y204)	p-STAT1(Y701)	0.008929
p-PDFGRA(Y849)/PDGFRB(Y857)	p-ABL(C-)(Y245)	0.008926
p-STAT1(Y701)	p-CRKII(Y221)	0.008923
p-FAK(Y576/577)	p-P70S6K(T421/S424)	0.008921
p-SRC(Y527)	p-4EBP1(S65)	0.008915
p-RAF(C-)(S338)	p-AKT(S473)	0.008906
p-STAT1(Y701)	p-FOXO1(S319)/FOXO4(S262)	0.008897
p-ABL(C-)(Y245)	p-P90RSK(S380)	0.008892
p-SAPK/JNK(T183/Y185)	p-PDFGRA(Y849)/PDGFRB(Y857)	0.00889
p-GAB1(Y627)	p-SAPK/JNK(T183/Y185)	0.008883
p-SHP2(Y542)	p-ERBB2(Y1221/1222)	0.008862
p-MET(Y1234/1235)	p-PDFGRA(Y849)/PDGFRB(Y857)	0.008858
p-EGFR(Y1086)	p-RAF(C-)(S259)	0.008854
p-RAF(C-)(S338)	p-SHC(Y239/240)	0.008853
p-STAT5(Y694)	p-PKCPAN/G(T514)	0.008848
p-PTEN(S380)	p-RAF(C-)(S259)	0.008848
p-SRC(Y416)	p-PDGFRA(Y754)	0.008847
p-KIT(C-)(Y719)	p-CDK2(T160)	0.008846
p-FOXO1(S319)/FOXO4(S262)	p-ERK1/2(T202/Y204)	0.008826
p-PDK1(S241)	p-CDK2(T160)	0.008823
p-FGFR1(Y653/654)	p-SHP2(Y542)	0.008821
p-ZAP70(Y319)/SYK(Y352)	p-EGFR(Y1173)	0.008815
p-FGFR1(Y653/654)	p-PDGFRB(Y1009)	0.008807
p-STAT5(Y694)	p-PDGFRA(Y754)	0.008805
p-P38MAPK(T180/Y182)	p-PDK1(S241)	0.008797
p-EGFR(Y845)	p-PDK1(S241)	0.008792
p-GAB1(Y627)	p-CRKII(Y221)	0.008785
p-JAK1(Y1022/1023)	p-FGFR1(Y653/654)	0.008783
p-PLCG1(Y783)	p-FGFR1(Y653/654)	0.008779
p-PDK1(S241)	p-MEK(1/2)(S217/221)	0.008763
p-PDGFRA(Y754)	p-SHP2(Y542)	0.008761
p-EGFR(Y1068)	p-MEK(1/2)(S217/221)	0.008757
p-PDFGRA(Y849)/PDGFRB(Y857)	p-IRS1(S1101)	0.008751
p-PI3KP85(Y458)P55(Y199)	p-MEK(1/2)(S217/221)	0.008751
p-SYK(Y525/526)	p-RAF(C-)(S338)	0.00875
p-FOXO1(S319)/FOXO4(S262)	p-P70S6K(T421/S424)	0.008748
p-PLCG1(Y783)	p-FOXO1(S319)/FOXO4(S262)	0.008735
p-ERBB2(Y1221/1222)	p-GAB1(Y627)	0.008727
p-PKCD(T505)	p-ZAP70(Y319)/SYK(Y352)	0.008722
p-STAT6(Y641)	p-PI3KP85(Y458)P55(Y199)	0.008717
p-FOXO1(S319)/FOXO4(S262)	p-ABL(C-)(Y245)	0.008713
p-KIT(C-)(Y719)	p-STAT6(Y641)	0.008712
p-FGFR1(Y653/654)	p-SAPK/JNK(T183/Y185)	0.008699
p-STAT5(Y694)	p-FAK(Y576/577)	0.008698
p-S6RIBPROT(S240/244)	p-MET(Y1349)	0.008686
p-GSK3A(S21)	p-PDGFRB(Y1009)	0.008684
p-PKCD(T505)	p-JAK1(Y1022/1023)	0.00868
p-PYK2(Y402)	p-SHC(Y239/240)	0.008675
p-CREB(S133)	p-PDK1(S241)	0.008662
p-PI3KP85(Y458)P55(Y199)	p-EGFR(Y845)	0.008654
p-SHC(Y239/240)	p-PDK1(S241)	0.008642
p-FOXO1(S319)/FOXO4(S262)	p-P38MAPK(T180/Y182)	0.008626
p-ERK1/2(T202/Y204)	p-STAT3(S727)	0.008623
p-PI3KP85(Y458)P55(Y199)	p-MET(Y1349)	0.008609
p-ABL(C-)(Y245)	p-STAT1(Y701)	0.008606
p-PTEN(S380)	p-GAB2(S159)	0.008577
p-PKCPAN/G(T514)	p-PDGFRA(Y754)	0.008572
p-AKT(S473)	p-SRC(Y416)	0.008558
p-MET(Y1234/1235)	p-ERK1/2(T202/Y204)	0.008551
p-AKT(S473)	p-KIT(C-)(Y719)	0.008548
p-MEK(1/2)(S217/221)	p-PDK1(S241)	0.008546
p-PDGFRA(Y754)	p-PDFGRA(Y849)/PDGFRB(Y857)	0.008536
p-MTOR(S2448)	p-CDK2(T160)	0.008534
p-SRC(Y527)	p-MTOR(S2448)	0.008507
p-MTOR(S2448)	p-PDGFRB(Y1009)	0.008499
p-PDK1(S241)	p-AKT(S473)	0.008484
p-FAK(Y576/577)	p-SAPK/JNK(T183/Y185)	0.008464
p-SAPK/JNK(T183/Y185)	p-RAF(C-)(S259)	0.008461
p-PYK2(Y402)	p-STAT5(Y694)	0.008434
p-IRS1(S1101)	p-KIT(C-)(Y719)	0.008428
p-STAT6(Y641)	p-GAB2(S159)	0.008413
p-MTOR(S2448)	p-SHP2(Y542)	0.008405
p-IGF1RB(Y1135/1136)/INSRB	p-CDK2(T160)	0.0084
p-IRS1(S1101)	p-4EBP1(T37/46)	0.008374
p-STAT1(Y701)	p-SAPK/JNK(T183/Y185)	0.008373
p-ABL(C-)(Y245)	p-CRKII(Y221)	0.008365
p-CREB(S133)	p-STAT5(Y694)	0.008337
p-AKT(S473)	p-STAT5(Y694)	0.00833
p-SAPK/JNK(T183/Y185)	p-PYK2(Y402)	0.008326
p-FAK(Y576/577)	p-EGFR(Y1068)	0.008325
p-EGFR(Y1068)	p-STAT6(Y641)	0.008322
p-MET(Y1234/1235)	p-MTOR(S2448)	0.008312
p-MET(Y1234/1235)	p-STAT5(Y694)	0.008257
p-ERK1/2(T202/Y204)	p-ABL(C-)(Y245)	0.008253
p-FGFR1(Y653/654)	p-MEK(1/2)(S217/221)	0.008239
p-GAB2(S159)	p-P90RSK(S380)	0.008234
p-ERK1/2(T202/Y204)	p-4EBP1(S65)	0.008224
p-STAT1(Y701)	p-ABL(C-)(Y245)	0.008223
p-STAT3(Y705)	p-PDGFRA(Y754)	0.008222
p-PKCD(T505)	p-4EBP1(T37/46)	0.008217
p-PKCD(T505)	p-4EBP1(S65)	0.008204
p-PDFGRA(Y849)/PDGFRB(Y857)	p-PLCG1(Y783)	0.008188
p-MTOR(S2448)	p-PDK1(S241)	0.008184
p-PKCD(T505)	p-STAT6(Y641)	0.008178
p-SHP2(Y542)	p-GSK3A(S21)	0.008172
p-PTEN(S380)	p-GAB1(Y627)	0.008159
p-EGFR(Y845)	p-CREB(S133)	0.00815
p-EGFR(Y1086)	p-RAF(C-)(S338)	0.008149
p-ERK1/2(T202/Y204)	p-EGFR(Y1068)	0.00813
p-FOXO1(S319)/FOXO4(S262)	p-4EBP1(T37/46)	0.00813
p-EGFR(Y1068)	p-ZAP70(Y319)/SYK(Y352)	0.008124
p-P90RSK(S380)	p-CREB(S133)	0.008115
p-ERK1/2(T202/Y204)	p-MTOR(S2448)	0.008114
p-FGFR1(Y653/654)	p-GSK3A(S21)	0.008113
p-STAT3(Y705)	p-ERK1/2(T202/Y204)	0.00811
p-STAT3(Y705)	p-PDGFRB(Y1009)	0.008108
p-CRKII(Y221)	p-KIT(C-)(Y719)	0.008104
p-CRKII(Y221)	p-STAT6(Y641)	0.0081
p-IRS1(S1101)	p-MET(Y1349)	0.008097
p-PYK2(Y402)	p-ZAP70(Y319)/SYK(Y352)	0.008092
p-EGFR(Y1068)	p-STAT5(Y694)	0.008091
p-PLCG2(Y759)	p-GSK3A(S21)	0.008086
p-SAPK/JNK(T183/Y185)	p-ERK1/2(T202/Y204)	0.008074
p-FOXO3A(S253)	p-STAT5(Y694)	0.008069
p-MEK(1/2)(S217/221)	p-FOXO3A(S253)	0.00806
p-RAF(C-)(S259)	p-4EBP1(T37/46)	0.008058
p-IRS1(S1101)	p-FAK(Y576/577)	0.008056
p-MTOR(S2448)	p-ABL(C-)(Y245)	0.008035
p-ERK1/2(T202/Y204)	p-PYK2(Y402)	0.00803
p-MEK(1/2)(S217/221)	p-4EBP1(S65)	0.008025
p-EGFR(Y1173)	p-ZAP70(Y319)/SYK(Y352)	0.008016
p-STAT1(Y701)	p-GAB2(S159)	0.008005
p-SRC(Y416)	p-IRS1(S1101)	0.007998
p-PKCD(T505)	p-MET(Y1349)	0.007997
p-STAT1(Y701)	p-PDK1(S241)	0.007996
p-PI3KP85(Y458)P55(Y199)	p-PYK2(Y402)	0.007993
p-GAB1(Y627)	p-AKT(S473)	0.007984
p-4EBP1(S65)	p-JAK1(Y1022/1023)	0.007977
p-PDGFRA(Y754)	p-ABL(C-)(Y245)	0.007976
p-PKCD(T505)	p-PDFGRA(Y849)/PDGFRB(Y857)	0.007976
p-CREB(S133)	p-KIT(C-)(Y719)	0.007972
p-KIT(C-)(Y719)	p-PYK2(Y402)	0.007963
p-ERK1/2(T202/Y204)	p-SAPK/JNK(T183/Y185)	0.007962
p-STAT1(Y701)	p-FAK(Y576/577)	0.007943
p-P38MAPK(T180/Y182)	p-P90RSK(S380)	0.007938
p-SYK(Y525/526)	p-PKCD(T505)	0.007933
p-FOXO3A(S253)	p-4EBP1(T37/46)	0.00792
p-EGFR(Y1173)	p-ERBB2(Y1221/1222)	0.007903
p-RAF(C-)(S338)	p-FAK(Y576/577)	0.007895
p-PLCG1(Y783)	p-FOXO3A(S253)	0.007893
p-CRKL(Y207)	p-MTOR(S2448)	0.007889
p-CRKII(Y221)	p-SHC(Y239/240)	0.007873
p-FGFR1(Y653/654)	p-4EBP1(T37/46)	0.007869
p-SHC(Y239/240)	p-RAF(C-)(S259)	0.007858
p-PKCPAN/G(T514)	p-PTEN(S380)	0.007851
p-4EBP1(T37/46)	p-SAPK/JNK(T183/Y185)	0.007849
p-ZAP70(Y319)/SYK(Y352)	p-KIT(C-)(Y719)	0.007842
p-SHC(Y239/240)	p-IGF1RB(Y1135/1136)/INSRB	0.007838
p-ERBB4(Y1284)	p-4EBP1(T37/46)	0.007837
p-PYK2(Y402)	p-IRS1(S1101)	0.007832
p-SRC(Y527)	p-RAF(C-)(S259)	0.007829
p-P38MAPK(T180/Y182)	p-PKCD(T505)	0.007822
p-STAT5(Y694)	p-AKT(S473)	0.00782
p-MET(Y1234/1235)	p-GSK3A(S21)	0.007818
p-FGFR1(Y653/654)	p-FOXO3A(S253)	0.007818
p-RAF(C-)(S259)	p-CDK2(T160)	0.007814
p-FOXO1(S319)/FOXO4(S262)	p-PDK1(S241)	0.007801
p-EGFR(Y1086)	p-PI3KP85(Y458)P55(Y199)	0.0078
p-STAT5(Y694)	p-CREB(S133)	0.007791
p-RAF(C-)(S338)	p-S6RIBPROT(S240/244)	0.007789
p-PDFGRA(Y849)/PDGFRB(Y857)	p-EGFR(Y1086)	0.007789
p-ABL(C-)(Y245)	p-FGFR1(Y653/654)	0.007784
p-MEK(1/2)(S217/221)	p-4EBP1(T37/46)	0.007765
p-SHC(Y239/240)	p-STAT5(Y694)	0.007752
p-FOXO1(S319)/FOXO4(S262)	p-KIT(C-)(Y719)	0.007742
p-PLCG1(Y783)	p-4EBP1(T37/46)	0.007742
p-RAF(C-)(S338)	p-4EBP1(T37/46)	0.00774
p-PDGFRB(Y1009)	p-SYK(Y525/526)	0.007727
p-PTEN(S380)	p-4EBP1(T37/46)	0.007727
p-PLCG2(Y759)	p-FOXO3A(S253)	0.007726
p-CDC2(Y15)	p-IGF1RB(Y1135/1136)/INSRB	0.007717
p-FAK(Y576/577)	p-PDK1(S241)	0.007716
p-ERBB4(Y1284)	p-SHP2(Y542)	0.007705
p-PDGFRA(Y754)	p-PTEN(S380)	0.007701
p-SRC(Y416)	p-GAB2(S159)	0.007694
p-STAT1(Y701)	p-IRS1(S1101)	0.007689
p-STAT1(Y701)	p-PTEN(S380)	0.007681
p-P90RSK(S380)	p-PI3KP85(Y458)P55(Y199)	0.007666
p-EGFR(Y1068)	p-ERBB4(Y1284)	0.007657
p-P38MAPK(T180/Y182)	p-P70S6K(T421/S424)	0.007657
p-PKCPAN/G(T514)	p-MET(Y1349)	0.007652
p-PTEN(S380)	p-ERBB4(Y1284)	0.007648
p-4EBP1(T37/46)	p-STAT5(Y694)	0.007643
p-STAT1(Y701)	p-GSK3A(S21)	0.007632
p-JAK1(Y1022/1023)	p-PYK2(Y402)	0.007631
p-PKCPAN/G(T514)	p-CDC2(Y15)	0.007624
p-SAPK/JNK(T183/Y185)	p-CREB(S133)	0.00762
p-STAT3(S727)	p-AKT(S473)	0.007618
p-PYK2(Y402)	p-GSK3A(S21)	0.007589
p-STAT3(Y705)	p-FOXO3A(S253)	0.007544
p-SHP2(Y542)	p-FOXO3A(S253)	0.007542
p-SRC(Y527)	p-PDK1(S241)	0.007537
p-KIT(C-)(Y719)	p-FOXO3A(S253)	0.007527
p-MET(Y1234/1235)	p-P70S6K(T421/S424)	0.007524
p-EGFR(Y1173)	p-PDK1(S241)	0.007524
p-STAT1(Y701)	p-P38MAPK(T180/Y182)	0.007521
p-PI3KP85(Y458)P55(Y199)	p-ABL(C-)(Y245)	0.007513
p-CDC2(Y15)	p-ZAP70(Y319)/SYK(Y352)	0.007508
p-EGFR(Y1068)	p-MTOR(S2448)	0.007491
p-CDK2(T160)	p-PDGFRB(Y1009)	0.007477
p-SYK(Y525/526)	p-RAF(C-)(S259)	0.007472
p-SHP2(Y542)	p-PDK1(S241)	0.007454
p-MEK(1/2)(S217/221)	p-IGF1RB(Y1135/1136)/INSRB	0.007445
p-PDK1(S241)	p-ZAP70(Y319)/SYK(Y352)	0.007444
p-SRC(Y416)	p-ZAP70(Y319)/SYK(Y352)	0.00744
p-EGFR(Y845)	p-STAT3(Y705)	0.007434
p-CRKL(Y207)	p-KIT(C-)(Y719)	0.007421
p-PDFGRA(Y849)/PDGFRB(Y857)	p-EGFR(Y1068)	0.007405
p-AKT(S473)	p-MET(Y1349)	0.00739
p-SAPK/JNK(T183/Y185)	p-IRS1(S1101)	0.007377
p-STAT3(Y705)	p-P70S6K(T421/S424)	0.007353
p-SRC(Y416)	p-PDGFRB(Y1009)	0.00735
p-STAT5(Y694)	p-S6RIBPROT(S240/244)	0.007338
p-CDK2(T160)	p-PDGFRA(Y754)	0.007326
p-FAK(Y576/577)	p-ERK1/2(T202/Y204)	0.007324
p-PI3KP85(Y458)P55(Y199)	p-SRC(Y416)	0.007322
p-FOXO3A(S253)	p-RAF(C-)(S338)	0.007322
p-EGFR(Y1068)	p-JAK1(Y1022/1023)	0.007306
p-SAPK/JNK(T183/Y185)	p-PKCPAN/G(T514)	0.007306
p-STAT5(Y694)	p-FOXO3A(S253)	0.007304
p-PKCPAN/G(T514)	p-EGFR(Y845)	0.007299
p-GAB1(Y627)	p-PDK1(S241)	0.007295
p-ERBB2(Y1221/1222)	p-PKCD(T505)	0.007293
p-CREB(S133)	p-PDGFRA(Y754)	0.007285
p-P90RSK(S380)	p-MET(Y1234/1235)	0.007284
p-KIT(C-)(Y719)	p-STAT3(Y705)	0.007262
p-STAT5(Y694)	p-SRC(Y416)	0.007258
p-PDK1(S241)	p-P90RSK(S380)	0.007256
p-FAK(Y576/577)	p-P38MAPK(T180/Y182)	0.007255
p-EGFR(Y1173)	p-SHP2(Y542)	0.007253
p-AKT(S473)	p-EGFR(Y1068)	0.007253
p-STAT6(Y641)	p-P70S6K(T421/S424)	0.007242
p-EGFR(Y1068)	p-IRS1(S1101)	0.007229
p-EGFR(Y1068)	p-SAPK/JNK(T183/Y185)	0.007226
p-IGF1RB(Y1135/1136)/INSRB	p-ZAP70(Y319)/SYK(Y352)	0.007225
p-ERBB2(Y1221/1222)	p-CREB(S133)	0.007224
p-PI3KP85(Y458)P55(Y199)	p-PDK1(S241)	0.007224
p-SRC(Y527)	p-P90RSK(S380)	0.007215
p-CDK2(T160)	p-MEK(1/2)(S217/221)	0.007211
p-GSK3A(S21)	p-PTEN(S380)	0.007208
p-PKCD(T505)	p-PTEN(S380)	0.007207
p-ABL(C-)(Y245)	p-EGFR(Y1086)	0.007199
p-S6RIBPROT(S240/244)	p-GAB1(Y627)	0.007188
p-STAT5(Y694)	p-CRKII(Y221)	0.007186
p-JAK1(Y1022/1023)	p-PI3KP85(Y458)P55(Y199)	0.007185
p-PDK1(S241)	p-MET(Y1349)	0.007184
p-AKT(S473)	p-GAB1(Y627)	0.007179
p-PLCG1(Y783)	p-ZAP70(Y319)/SYK(Y352)	0.007177
p-CRKII(Y221)	p-STAT5(Y694)	0.007176
p-P70S6K(T421/S424)	p-4EBP1(T37/46)	0.007176
p-PLCG1(Y783)	p-MEK(1/2)(S217/221)	0.007175
p-RAF(C-)(S338)	p-SRC(Y527)	0.007164
p-ERBB2(Y1221/1222)	p-EGFR(Y1173)	0.007161
p-IRS1(S1101)	p-ABL(C-)(Y245)	0.00716
p-P90RSK(S380)	p-STAT3(S727)	0.007157
p-MTOR(S2448)	p-PTEN(S380)	0.007151
p-PDGFRA(Y754)	p-STAT1(Y701)	0.007151
p-CRKL(Y207)	p-PDFGRA(Y849)/PDGFRB(Y857)	0.007145
p-ABL(C-)(Y245)	p-GSK3A(S21)	0.007143
p-PLCG2(Y759)	p-4EBP1(S65)	0.007142
p-P38MAPK(T180/Y182)	p-4EBP1(S65)	0.007141
p-SRC(Y527)	p-PKCD(T505)	0.007133
p-PTEN(S380)	p-CREB(S133)	0.007132
p-FOXO1(S319)/FOXO4(S262)	p-ERBB2(Y1221/1222)	0.007123
p-P38MAPK(T180/Y182)	p-GAB2(S159)	0.007113
p-RAF(C-)(S338)	p-STAT1(Y701)	0.007098
p-PLCG1(Y783)	p-SRC(Y416)	0.007098
p-PDFGRA(Y849)/PDGFRB(Y857)	p-PTEN(S380)	0.007096
p-ERBB2(Y1221/1222)	p-EGFR(Y1068)	0.007094
p-SHP2(Y542)	p-PKCPAN/G(T514)	0.007093
p-EGFR(Y1086)	p-FOXO3A(S253)	0.007092
p-PDGFRA(Y754)	p-GAB1(Y627)	0.007087
p-EGFR(Y1173)	p-KIT(C-)(Y719)	0.007083
p-JAK1(Y1022/1023)	p-4EBP1(T37/46)	0.00708
p-GAB2(S159)	p-STAT3(S727)	0.007074
p-MEK(1/2)(S217/221)	p-SHP2(Y542)	0.00706
p-S6RIBPROT(S240/244)	p-ERK1/2(T202/Y204)	0.007058
p-FGFR1(Y653/654)	p-PI3KP85(Y458)P55(Y199)	0.007055
p-EGFR(Y1173)	p-STAT5(Y694)	0.007055
p-STAT3(S727)	p-GSK3A(S21)	0.007042
p-SRC(Y416)	p-PLCG2(Y759)	0.007035
p-PDK1(S241)	p-IGF1RB(Y1135/1136)/INSRB	0.00703
p-P70S6K(T421/S424)	p-MET(Y1349)	0.007028
p-ABL(C-)(Y245)	p-4EBP1(S65)	0.006991
p-STAT5(Y694)	p-MTOR(S2448)	0.006981
p-CDK2(T160)	p-FOXO1(S319)/FOXO4(S262)	0.006977
p-SYK(Y525/526)	p-PDK1(S241)	0.00697
p-SHC(Y239/240)	p-P70S6K(T421/S424)	0.006969
p-AKT(S473)	p-GAB2(S159)	0.006966
p-MEK(1/2)(S217/221)	p-P90RSK(S380)	0.006962
p-CRKII(Y221)	p-PDFGRA(Y849)/PDGFRB(Y857)	0.006962
p-PDGFRB(Y1009)	p-STAT1(Y701)	0.006939
p-FGFR1(Y653/654)	p-PTEN(S380)	0.006936
p-STAT3(S727)	p-GAB2(S159)	0.006935
p-CRKII(Y221)	p-PLCG2(Y759)	0.006935
p-S6RIBPROT(S240/244)	p-SAPK/JNK(T183/Y185)	0.006931
p-ABL(C-)(Y245)	p-ZAP70(Y319)/SYK(Y352)	0.00692
p-SHC(Y239/240)	p-4EBP1(S65)	0.006906
p-ERK1/2(T202/Y204)	p-PDK1(S241)	0.00688
p-IRS1(S1101)	p-CRKL(Y207)	0.00688
p-EGFR(Y845)	p-MEK(1/2)(S217/221)	0.006866
p-STAT1(Y701)	p-ERBB2(Y1221/1222)	0.006862
p-CREB(S133)	p-PTEN(S380)	0.006851
p-GAB1(Y627)	p-STAT6(Y641)	0.00685
p-P70S6K(T421/S424)	p-SRC(Y527)	0.006841
p-CRKII(Y221)	p-FGFR1(Y653/654)	0.006835
p-PDK1(S241)	p-ERK1/2(T202/Y204)	0.006834
p-PI3KP85(Y458)P55(Y199)	p-SHP2(Y542)	0.006832
p-RAF(C-)(S338)	p-FOXO3A(S253)	0.006831
p-ERK1/2(T202/Y204)	p-GAB2(S159)	0.006828
p-FOXO3A(S253)	p-MEK(1/2)(S217/221)	0.006825
p-CRKII(Y221)	p-PI3KP85(Y458)P55(Y199)	0.006824
p-PDGFRA(Y754)	p-RAF(C-)(S259)	0.006824
p-CREB(S133)	p-GAB2(S159)	0.006819
p-EGFR(Y845)	p-PKCPAN/G(T514)	0.006811
p-MET(Y1349)	p-GAB1(Y627)	0.006806
p-SAPK/JNK(T183/Y185)	p-STAT1(Y701)	0.006805
p-PTEN(S380)	p-ABL(C-)(Y245)	0.006804
p-SHP2(Y542)	p-FAK(Y576/577)	0.006803
p-GAB1(Y627)	p-STAT1(Y701)	0.006794
p-SRC(Y416)	p-CDC2(Y15)	0.006793
p-S6RIBPROT(S240/244)	p-GSK3A(S21)	0.006792
p-EGFR(Y1068)	p-GSK3A(S21)	0.006788
p-ERBB2(Y1221/1222)	p-PDGFRB(Y1009)	0.006781
p-GSK3A(S21)	p-ZAP70(Y319)/SYK(Y352)	0.006775
p-PDFGRA(Y849)/PDGFRB(Y857)	p-CDK2(T160)	0.006752
p-RAF(C-)(S259)	p-PTEN(S380)	0.006745
p-IRS1(S1101)	p-CREB(S133)	0.006741
p-CDK2(T160)	p-IGF1RB(Y1135/1136)/INSRB	0.006731
p-CREB(S133)	p-FAK(Y576/577)	0.006718
p-4EBP1(S65)	p-CDC2(Y15)	0.006716
p-EGFR(Y1086)	p-CRKII(Y221)	0.006716
p-CDK2(T160)	p-ERBB2(Y1221/1222)	0.006705
p-PLCG1(Y783)	p-ERK1/2(T202/Y204)	0.006702
p-FOXO1(S319)/FOXO4(S262)	p-SRC(Y416)	0.006692
p-SAPK/JNK(T183/Y185)	p-GSK3A(S21)	0.006689
p-CDC2(Y15)	p-FOXO1(S319)/FOXO4(S262)	0.006687
p-EGFR(Y1086)	p-PTEN(S380)	0.006681
p-STAT3(S727)	p-4EBP1(T37/46)	0.006679
p-RAF(C-)(S259)	p-IGF1RB(Y1135/1136)/INSRB	0.006672
p-ABL(C-)(Y245)	p-PDGFRA(Y754)	0.00667
p-GAB1(Y627)	p-GSK3A(S21)	0.006659
p-GSK3A(S21)	p-SRC(Y527)	0.006658
p-PTEN(S380)	p-PKCD(T505)	0.006655
p-RAF(C-)(S259)	p-P90RSK(S380)	0.006638
p-IGF1RB(Y1135/1136)/INSRB	p-STAT3(S727)	0.006638
p-STAT3(S727)	p-IGF1RB(Y1135/1136)/INSRB	0.006636
p-PI3KP85(Y458)P55(Y199)	p-MTOR(S2448)	0.006633
p-P70S6K(T421/S424)	p-FOXO1(S319)/FOXO4(S262)	0.006632
p-GAB1(Y627)	p-FOXO1(S319)/FOXO4(S262)	0.006631
p-PKCPAN/G(T514)	p-RAF(C-)(S338)	0.006626
p-IGF1RB(Y1135/1136)/INSRB	p-STAT1(Y701)	0.006614
p-RAF(C-)(S259)	p-PKCD(T505)	0.006612
p-CREB(S133)	p-MTOR(S2448)	0.006603
p-KIT(C-)(Y719)	p-MET(Y1234/1235)	0.006595
p-SYK(Y525/526)	p-CREB(S133)	0.006595
p-PI3KP85(Y458)P55(Y199)	p-SAPK/JNK(T183/Y185)	0.006593
p-GSK3A(S21)	p-SHP2(Y542)	0.006592
p-SHC(Y239/240)	p-PDGFRA(Y754)	0.006584
p-P38MAPK(T180/Y182)	p-ERK1/2(T202/Y204)	0.006577
p-JAK1(Y1022/1023)	p-PLCG2(Y759)	0.006575
p-GAB1(Y627)	p-KIT(C-)(Y719)	0.006556
p-CREB(S133)	p-CDC2(Y15)	0.006547
p-SYK(Y525/526)	p-P90RSK(S380)	0.006545
p-EGFR(Y845)	p-STAT6(Y641)	0.00654
p-PLCG2(Y759)	p-4EBP1(T37/46)	0.006539
p-PKCPAN/G(T514)	p-STAT1(Y701)	0.006533
p-RAF(C-)(S338)	p-PKCPAN/G(T514)	0.006531
p-CDK2(T160)	p-FAK(Y576/577)	0.006531
p-CREB(S133)	p-EGFR(Y1068)	0.006527
p-GAB1(Y627)	p-SRC(Y527)	0.006518
p-SAPK/JNK(T183/Y185)	p-PDGFRB(Y1009)	0.006517
p-PLCG1(Y783)	p-CRKII(Y221)	0.006502
p-PDGFRB(Y1009)	p-GSK3A(S21)	0.0065
p-P70S6K(T421/S424)	p-IGF1RB(Y1135/1136)/INSRB	0.006497
p-EGFR(Y1173)	p-PDGFRB(Y1009)	0.006488
p-MET(Y1234/1235)	p-IRS1(S1101)	0.006486
p-SHP2(Y542)	p-IRS1(S1101)	0.006483
p-EGFR(Y1068)	p-P70S6K(T421/S424)	0.006473
p-PDFGRA(Y849)/PDGFRB(Y857)	p-MET(Y1234/1235)	0.006471
p-P70S6K(T421/S424)	p-PDK1(S241)	0.006467
p-PKCPAN/G(T514)	p-ABL(C-)(Y245)	0.006465
p-MET(Y1349)	p-EGFR(Y845)	0.006459
p-KIT(C-)(Y719)	p-PTEN(S380)	0.006442
p-SHP2(Y542)	p-FOXO1(S319)/FOXO4(S262)	0.00644
p-PYK2(Y402)	p-FGFR1(Y653/654)	0.006438
p-MTOR(S2448)	p-STAT3(Y705)	0.006421
p-CRKII(Y221)	p-EGFR(Y1068)	0.006413
p-SYK(Y525/526)	p-CDC2(Y15)	0.006412
p-MEK(1/2)(S217/221)	p-JAK1(Y1022/1023)	0.0064
p-PDK1(S241)	p-PKCPAN/G(T514)	0.0064
p-4EBP1(T37/46)	p-IRS1(S1101)	0.006395
p-FAK(Y576/577)	p-SHC(Y239/240)	0.006384
p-GAB1(Y627)	p-FOXO3A(S253)	0.006383
p-STAT3(Y705)	p-SAPK/JNK(T183/Y185)	0.006374
p-P90RSK(S380)	p-P38MAPK(T180/Y182)	0.00637
p-MTOR(S2448)	p-STAT6(Y641)	0.006369
p-RAF(C-)(S338)	p-EGFR(Y1068)	0.006366
p-CDK2(T160)	p-STAT1(Y701)	0.006365
p-GAB2(S159)	p-MEK(1/2)(S217/221)	0.006348
p-PYK2(Y402)	p-PLCG1(Y783)	0.006333
p-CRKII(Y221)	p-STAT3(S727)	0.006321
p-SHP2(Y542)	p-RAF(C-)(S338)	0.006314
p-EGFR(Y1173)	p-4EBP1(S65)	0.006306
p-PLCG2(Y759)	p-CDC2(Y15)	0.0063
p-CDK2(T160)	p-PLCG1(Y783)	0.006298
p-JAK1(Y1022/1023)	p-GAB2(S159)	0.006297
p-ERK1/2(T202/Y204)	p-P90RSK(S380)	0.006293
p-ABL(C-)(Y245)	p-PDK1(S241)	0.00629
p-SAPK/JNK(T183/Y185)	p-PKCD(T505)	0.006288
p-KIT(C-)(Y719)	p-CRKII(Y221)	0.006287
p-SHP2(Y542)	p-MET(Y1349)	0.006265
p-ZAP70(Y319)/SYK(Y352)	p-FOXO3A(S253)	0.006265
p-GAB1(Y627)	p-CREB(S133)	0.006263
p-ERBB2(Y1221/1222)	p-SHC(Y239/240)	0.006256
p-CRKII(Y221)	p-GAB2(S159)	0.006249
p-ERBB4(Y1284)	p-P70S6K(T421/S424)	0.006248
p-FAK(Y576/577)	p-EGFR(Y1173)	0.006247
p-4EBP1(T37/46)	p-STAT1(Y701)	0.006244
p-STAT3(S727)	p-PI3KP85(Y458)P55(Y199)	0.006239
p-FAK(Y576/577)	p-PDGFRB(Y1009)	0.006232
p-JAK1(Y1022/1023)	p-CDK2(T160)	0.006217
p-PLCG2(Y759)	p-STAT3(S727)	0.006214
p-ABL(C-)(Y245)	p-IRS1(S1101)	0.006213
p-GAB1(Y627)	p-SYK(Y525/526)	0.006204
p-STAT3(Y705)	p-PI3KP85(Y458)P55(Y199)	0.006196
p-RAF(C-)(S259)	p-4EBP1(S65)	0.006195
p-FGFR1(Y653/654)	p-PDGFRA(Y754)	0.006168
p-PDGFRA(Y754)	p-P70S6K(T421/S424)	0.006158
p-EGFR(Y845)	p-STAT5(Y694)	0.006154
p-P90RSK(S380)	p-SHP2(Y542)	0.006152
p-STAT1(Y701)	p-S6RIBPROT(S240/244)	0.006133
p-STAT6(Y641)	p-PTEN(S380)	0.006132
p-KIT(C-)(Y719)	p-MTOR(S2448)	0.006131
p-IGF1RB(Y1135/1136)/INSRB	p-4EBP1(T37/46)	0.006129
p-ERK1/2(T202/Y204)	p-SHP2(Y542)	0.006123
p-MET(Y1234/1235)	p-CRKL(Y207)	0.00612
p-FOXO3A(S253)	p-FAK(Y576/577)	0.006116
p-PDFGRA(Y849)/PDGFRB(Y857)	p-FOXO3A(S253)	0.006114
p-PI3KP85(Y458)P55(Y199)	p-4EBP1(T37/46)	0.006114
p-PLCG2(Y759)	p-RAF(C-)(S338)	0.006113
p-FGFR1(Y653/654)	p-IRS1(S1101)	0.006103
p-IGF1RB(Y1135/1136)/INSRB	p-EGFR(Y1086)	0.006091
p-PLCG2(Y759)	p-SHC(Y239/240)	0.00609
p-MEK(1/2)(S217/221)	p-P70S6K(T421/S424)	0.006084
p-STAT3(S727)	p-FOXO1(S319)/FOXO4(S262)	0.006074
p-PDGFRB(Y1009)	p-CDC2(Y15)	0.006073
p-JAK1(Y1022/1023)	p-SHP2(Y542)	0.006071
p-MET(Y1349)	p-ERBB4(Y1284)	0.006069
p-S6RIBPROT(S240/244)	p-ABL(C-)(Y245)	0.006037
p-IGF1RB(Y1135/1136)/INSRB	p-MET(Y1349)	0.006035
p-ERBB4(Y1284)	p-STAT5(Y694)	0.006026
p-4EBP1(S65)	p-MEK(1/2)(S217/221)	0.006005
p-GAB1(Y627)	p-FGFR1(Y653/654)	0.006003
p-GSK3A(S21)	p-STAT5(Y694)	0.005998
p-MTOR(S2448)	p-PI3KP85(Y458)P55(Y199)	0.005987
p-S6RIBPROT(S240/244)	p-GAB2(S159)	0.005982
p-EGFR(Y1068)	p-PDGFRB(Y1009)	0.005971
p-MET(Y1349)	p-STAT3(Y705)	0.00597
p-STAT3(S727)	p-P90RSK(S380)	0.005965
p-GAB1(Y627)	p-ERBB2(Y1221/1222)	0.005961
p-P90RSK(S380)	p-SRC(Y527)	0.00595
p-STAT5(Y694)	p-P90RSK(S380)	0.005949
p-PDGFRA(Y754)	p-FOXO1(S319)/FOXO4(S262)	0.005944
p-S6RIBPROT(S240/244)	p-RAF(C-)(S338)	0.005939
p-PYK2(Y402)	p-STAT3(Y705)	0.005937
p-PDFGRA(Y849)/PDGFRB(Y857)	p-4EBP1(S65)	0.005935
p-P70S6K(T421/S424)	p-PDGFRB(Y1009)	0.005934
p-AKT(S473)	p-ABL(C-)(Y245)	0.005934
p-GSK3A(S21)	p-FOXO1(S319)/FOXO4(S262)	0.00593
p-PLCG1(Y783)	p-SHC(Y239/240)	0.005929
p-CDK2(T160)	p-GAB2(S159)	0.005923
p-GAB2(S159)	p-P38MAPK(T180/Y182)	0.005922
p-STAT3(Y705)	p-MEK(1/2)(S217/221)	0.00592
p-P38MAPK(T180/Y182)	p-MET(Y1349)	0.005915
p-GAB2(S159)	p-PKCD(T505)	0.00591
p-4EBP1(T37/46)	p-STAT3(S727)	0.005899
p-KIT(C-)(Y719)	p-CREB(S133)	0.005898
p-STAT3(S727)	p-RAF(C-)(S338)	0.005898
p-PDFGRA(Y849)/PDGFRB(Y857)	p-CRKL(Y207)	0.005897
p-EGFR(Y845)	p-PDGFRB(Y1009)	0.005893
p-EGFR(Y1086)	p-PDK1(S241)	0.005889
p-SRC(Y527)	p-CDC2(Y15)	0.005889
p-GAB1(Y627)	p-PTEN(S380)	0.005884
p-PKCPAN/G(T514)	p-GAB1(Y627)	0.005881
p-P70S6K(T421/S424)	p-GAB2(S159)	0.00586
p-KIT(C-)(Y719)	p-P90RSK(S380)	0.005859
p-AKT(S473)	p-STAT1(Y701)	0.005859
p-SHC(Y239/240)	p-4EBP1(T37/46)	0.005857
p-STAT1(Y701)	p-CDK2(T160)	0.005855
p-SAPK/JNK(T183/Y185)	p-S6RIBPROT(S240/244)	0.005854
p-EGFR(Y845)	p-IGF1RB(Y1135/1136)/INSRB	0.005854
p-SYK(Y525/526)	p-P38MAPK(T180/Y182)	0.005853
p-SHC(Y239/240)	p-PKCD(T505)	0.005845
p-FOXO1(S319)/FOXO4(S262)	p-IRS1(S1101)	0.005844
p-STAT3(Y705)	p-CDC2(Y15)	0.005843
p-PKCD(T505)	p-GAB2(S159)	0.005839
p-GAB1(Y627)	p-PKCPAN/G(T514)	0.005837
p-PDGFRA(Y754)	p-PDGFRB(Y1009)	0.005835
p-4EBP1(T37/46)	p-P90RSK(S380)	0.005834
p-STAT5(Y694)	p-SHC(Y239/240)	0.005832
p-SYK(Y525/526)	p-GAB2(S159)	0.005831
p-STAT5(Y694)	p-IGF1RB(Y1135/1136)/INSRB	0.005828
p-FOXO3A(S253)	p-PDGFRB(Y1009)	0.005823
p-SAPK/JNK(T183/Y185)	p-CRKL(Y207)	0.005818
p-EGFR(Y1173)	p-P70S6K(T421/S424)	0.005815
p-EGFR(Y845)	p-AKT(S473)	0.005791
p-PKCD(T505)	p-S6RIBPROT(S240/244)	0.005783
p-SHP2(Y542)	p-MET(Y1234/1235)	0.005781
p-P38MAPK(T180/Y182)	p-STAT5(Y694)	0.005778
p-4EBP1(S65)	p-AKT(S473)	0.005772
p-PKCD(T505)	p-EGFR(Y1068)	0.005761
p-4EBP1(S65)	p-P90RSK(S380)	0.005746
p-PKCD(T505)	p-AKT(S473)	0.005745
p-EGFR(Y845)	p-4EBP1(S65)	0.005733
p-FAK(Y576/577)	p-EGFR(Y845)	0.005729
p-MEK(1/2)(S217/221)	p-GAB2(S159)	0.005715
p-CREB(S133)	p-4EBP1(S65)	0.005714
p-CREB(S133)	p-ABL(C-)(Y245)	0.00571
p-JAK1(Y1022/1023)	p-PLCG1(Y783)	0.005704
p-RAF(C-)(S338)	p-FGFR1(Y653/654)	0.005699
p-SHC(Y239/240)	p-IRS1(S1101)	0.005695
p-SYK(Y525/526)	p-AKT(S473)	0.005692
p-SRC(Y416)	p-SAPK/JNK(T183/Y185)	0.005691
p-PTEN(S380)	p-FOXO1(S319)/FOXO4(S262)	0.005683
p-EGFR(Y1068)	p-PI3KP85(Y458)P55(Y199)	0.005677
p-STAT1(Y701)	p-AKT(S473)	0.005675
p-EGFR(Y1173)	p-CREB(S133)	0.005671
p-STAT3(Y705)	p-PDK1(S241)	0.005668
p-STAT3(S727)	p-PDGFRA(Y754)	0.005661
p-ABL(C-)(Y245)	p-ERK1/2(T202/Y204)	0.005661
p-STAT5(Y694)	p-PDK1(S241)	0.005659
p-PLCG1(Y783)	p-PDGFRA(Y754)	0.005656
p-PLCG2(Y759)	p-SRC(Y527)	0.005654
p-PDGFRB(Y1009)	p-4EBP1(S65)	0.00565
p-PLCG1(Y783)	p-GSK3A(S21)	0.005644
p-SYK(Y525/526)	p-4EBP1(T37/46)	0.005637
p-KIT(C-)(Y719)	p-ERBB2(Y1221/1222)	0.00563
p-FOXO1(S319)/FOXO4(S262)	p-STAT5(Y694)	0.005621
p-MTOR(S2448)	p-PDGFRA(Y754)	0.005613
p-PLCG1(Y783)	p-PDK1(S241)	0.005609
p-EGFR(Y1086)	p-STAT3(S727)	0.005607
p-4EBP1(T37/46)	p-ERK1/2(T202/Y204)	0.005606
p-PI3KP85(Y458)P55(Y199)	p-EGFR(Y1068)	0.005605
p-MET(Y1349)	p-P90RSK(S380)	0.0056
p-SRC(Y416)	p-IGF1RB(Y1135/1136)/INSRB	0.00559
p-P90RSK(S380)	p-ERBB2(Y1221/1222)	0.005587
p-RAF(C-)(S259)	p-ZAP70(Y319)/SYK(Y352)	0.005583
p-ABL(C-)(Y245)	p-JAK1(Y1022/1023)	0.005575
p-P70S6K(T421/S424)	p-EGFR(Y1173)	0.005567
p-PLCG2(Y759)	p-SAPK/JNK(T183/Y185)	0.005567
p-PDGFRB(Y1009)	p-FGFR1(Y653/654)	0.005554
p-IRS1(S1101)	p-P38MAPK(T180/Y182)	0.005552
p-RAF(C-)(S259)	p-PDGFRB(Y1009)	0.00555
p-AKT(S473)	p-RAF(C-)(S338)	0.005543
p-MTOR(S2448)	p-ERBB4(Y1284)	0.005541
p-GAB2(S159)	p-JAK1(Y1022/1023)	0.00553
p-IGF1RB(Y1135/1136)/INSRB	p-SHC(Y239/240)	0.005525
p-IRS1(S1101)	p-STAT5(Y694)	0.005524
p-RAF(C-)(S259)	p-JAK1(Y1022/1023)	0.005521
p-GAB2(S159)	p-MTOR(S2448)	0.005519
p-SRC(Y527)	p-PYK2(Y402)	0.005509
p-JAK1(Y1022/1023)	p-SAPK/JNK(T183/Y185)	0.005508
p-SRC(Y416)	p-PKCD(T505)	0.005506
p-PKCPAN/G(T514)	p-GAB2(S159)	0.005498
p-SRC(Y416)	p-STAT3(S727)	0.005496
p-P90RSK(S380)	p-4EBP1(S65)	0.005493
p-ERBB2(Y1221/1222)	p-SHP2(Y542)	0.005486
p-MTOR(S2448)	p-PLCG2(Y759)	0.00548
p-KIT(C-)(Y719)	p-GSK3A(S21)	0.005479
p-STAT3(Y705)	p-4EBP1(T37/46)	0.005476
p-ZAP70(Y319)/SYK(Y352)	p-PTEN(S380)	0.00547
p-SAPK/JNK(T183/Y185)	p-MEK(1/2)(S217/221)	0.005469
p-PKCPAN/G(T514)	p-STAT3(S727)	0.005467
p-PKCD(T505)	p-SHC(Y239/240)	0.005464
p-PTEN(S380)	p-PDFGRA(Y849)/PDGFRB(Y857)	0.005462
p-ERBB4(Y1284)	p-GAB2(S159)	0.005455
p-GAB2(S159)	p-PDGFRB(Y1009)	0.005454
p-ERBB4(Y1284)	p-ERK1/2(T202/Y204)	0.005445
p-P70S6K(T421/S424)	p-SAPK/JNK(T183/Y185)	0.005441
p-FGFR1(Y653/654)	p-P38MAPK(T180/Y182)	0.005437
p-P38MAPK(T180/Y182)	p-4EBP1(T37/46)	0.005437
p-CREB(S133)	p-FOXO1(S319)/FOXO4(S262)	0.005437
p-SRC(Y527)	p-GAB1(Y627)	0.005433
[truncated: 1,542 more rows]
