# Supplementary material for: The DIONESUS algorithm provides scalable and accurate reconstruction of dynamic phosphoproteomic networks to reveal new drug targets
Source: Royal Society of Chemistry journal article supplement (doi:10.1039/c5ib00065c), 2015-01-01
Supplement: c5ib00065c14.xlsx [file c5ib00065c14.xlsx]

## Sheet: x150130_Input_NoNames_Inferelat
Supplementary Table 9. Edge list (Inferelator)
Parent Node	Daughter Node	Confidence Metric (Edge Confidence)
p-JAK1(Y1022/1023)	p-ZAP70(Y319)/SYK(Y352)	1
p-MEK(1/2)(S217/221)	p-ERK1/2(T202/Y204)	0.99367
p-AKT(S473)	p-PKCPAN/G(T514)	0.912087
p-CREB(S133)	p-CRKL(Y207)	0.912087
p-EGFR(Y845)	p-EGFR(Y1173)	0.880179
p-ERK1/2(T202/Y204)	p-MEK(1/2)(S217/221)	0.874785
p-RAF(C-)(S259)	p-RAF(C-)(S338)	0.871927
p-EGFR(Y845)	p-MET(Y1234/1235)	0.834514
p-PKCPAN/G(T514)	p-AKT(S473)	0.824963
p-KIT(C-)(Y719)	p-STAT5(Y694)	0.821426
p-MET(Y1234/1235)	p-SYK(Y525/526)	0.810583
p-CRKL(Y207)	p-CREB(S133)	0.805006
p-P70S6K(T421/S424)	p-PKCPAN/G(T514)	0.802745
p-SRC(Y527)	p-CRKL(Y207)	0.784174
p-PKCPAN/G(T514)	p-S6RIBPROT(S240/244)	0.768666
p-ZAP70(Y319)/SYK(Y352)	p-JAK1(Y1022/1023)	0.766457
p-PI3KP85(Y458)P55(Y199)	p-S6RIBPROT(S240/244)	0.763824
p-IRS1(S1101)	p-GSK3A(S21)	0.758983
p-MET(Y1234/1235)	p-EGFR(Y845)	0.754558
p-MTOR(S2448)	p-FOXO3A(S253)	0.738306
p-PKCPAN/G(T514)	p-CDK2(T160)	0.735399
p-STAT3(Y705)	p-ZAP70(Y319)/SYK(Y352)	0.731729
p-GSK3A(S21)	p-IRS1(S1101)	0.726514
p-AKT(S473)	p-S6RIBPROT(S240/244)	0.720586
p-CRKL(Y207)	p-SRC(Y527)	0.720034
p-CRKL(Y207)	p-PI3KP85(Y458)P55(Y199)	0.715339
p-S6RIBPROT(S240/244)	p-PKCPAN/G(T514)	0.700197
p-MTOR(S2448)	p-CDC2(Y15)	0.690679
p-MET(Y1234/1235)	p-EGFR(Y1173)	0.69063
p-CDC2(Y15)	p-PDGFRA(Y754)	0.68765
p-CDK2(T160)	p-PKCPAN/G(T514)	0.684415
p-RAF(C-)(S338)	p-RAF(C-)(S259)	0.683566
p-S6RIBPROT(S240/244)	p-AKT(S473)	0.669357
p-CDC2(Y15)	p-ERK1/2(T202/Y204)	0.661748
p-PDGFRA(Y754)	p-CDC2(Y15)	0.661385
p-JAK1(Y1022/1023)	p-ERBB4(Y1284)	0.659094
p-PYK2(Y402)	p-PDFGRA(Y849)/PDGFRB(Y857)	0.656798
p-SRC(Y416)	p-PYK2(Y402)	0.655535
p-RAF(C-)(S259)	p-ABL(C-)(Y245)	0.654264
p-EGFR(Y845)	p-PLCG1(Y783)	0.652989
p-EGFR(Y1173)	p-EGFR(Y845)	0.652468
p-MTOR(S2448)	p-P38MAPK(T180/Y182)	0.652215
p-4EBP1(S65)	p-4EBP1(T37/46)	0.652106
p-ABL(C-)(Y245)	p-ERBB2(Y1221/1222)	0.649241
p-FAK(Y576/577)	p-STAT3(Y705)	0.648208
p-GAB2(S159)	p-IRS1(S1101)	0.643015
p-CDC2(Y15)	p-MTOR(S2448)	0.641665
p-PLCG1(Y783)	p-EGFR(Y845)	0.639907
p-KIT(C-)(Y719)	p-EGFR(Y845)	0.63509
p-PYK2(Y402)	p-SRC(Y416)	0.634849
p-P90RSK(S380)	p-AKT(S473)	0.634787
p-SRC(Y527)	p-CREB(S133)	0.633613
p-STAT5(Y694)	p-KIT(C-)(Y719)	0.627245
p-ABL(C-)(Y245)	p-FAK(Y576/577)	0.626569
p-PTEN(S380)	p-GAB1(Y627)	0.625628
p-PI3KP85(Y458)P55(Y199)	p-CRKL(Y207)	0.61819
p-PLCG2(Y759)	p-EGFR(Y1173)	0.615375
p-SHC(Y239/240)	p-MTOR(S2448)	0.613486
p-FOXO3A(S253)	p-MTOR(S2448)	0.612077
p-SRC(Y416)	p-SYK(Y525/526)	0.605682
p-CREB(S133)	p-PI3KP85(Y458)P55(Y199)	0.598907
p-PTEN(S380)	p-PDGFRB(Y1009)	0.598358
p-ABL(C-)(Y245)	p-ERBB4(Y1284)	0.59812
p-CREB(S133)	p-P70S6K(T421/S424)	0.59646
p-STAT3(S727)	p-PDGFRA(Y754)	0.596397
p-SYK(Y525/526)	p-PYK2(Y402)	0.596393
p-FGFR1(Y653/654)	p-STAT6(Y641)	0.59563
p-EGFR(Y1068)	p-MET(Y1349)	0.589078
p-SYK(Y525/526)	p-MET(Y1234/1235)	0.588449
p-ZAP70(Y319)/SYK(Y352)	p-STAT3(Y705)	0.588046
p-RAF(C-)(S338)	p-GSK3A(S21)	0.587196
p-ERBB4(Y1284)	p-PDFGRA(Y849)/PDGFRB(Y857)	0.585931
p-P38MAPK(T180/Y182)	p-MTOR(S2448)	0.585559
p-KIT(C-)(Y719)	p-SRC(Y416)	0.585014
p-STAT3(Y705)	p-FAK(Y576/577)	0.58297
p-FAK(Y576/577)	p-ERBB4(Y1284)	0.581747
p-GSK3A(S21)	p-RAF(C-)(S338)	0.581128
p-GSK3A(S21)	p-PDK1(S241)	0.580648
p-ABL(C-)(Y245)	p-RAF(C-)(S259)	0.579732
p-SHP2(Y542)	p-PYK2(Y402)	0.579191
p-S6RIBPROT(S240/244)	p-CDK2(T160)	0.577506
p-CREB(S133)	p-SRC(Y527)	0.57404
p-CRKL(Y207)	p-P38MAPK(T180/Y182)	0.572358
p-PYK2(Y402)	p-STAT1(Y701)	0.57176
p-CRKII(Y221)	p-ERBB2(Y1221/1222)	0.569052
p-ERBB2(Y1221/1222)	p-SYK(Y525/526)	0.568283
p-EGFR(Y845)	p-EGFR(Y1068)	0.565634
p-P90RSK(S380)	p-RAF(C-)(S338)	0.563801
p-4EBP1(S65)	p-PDGFRA(Y754)	0.562775
p-PLCG2(Y759)	p-MET(Y1234/1235)	0.561219
p-FOXO1(S319)/FOXO4(S262)	p-P38MAPK(T180/Y182)	0.559155
p-EGFR(Y1173)	p-MET(Y1234/1235)	0.557594
p-SYK(Y525/526)	p-EGFR(Y1086)	0.555674
p-RAF(C-)(S259)	p-P70S6K(T421/S424)	0.555663
p-PDGFRB(Y1009)	p-SHP2(Y542)	0.555541
p-FOXO1(S319)/FOXO4(S262)	p-SAPK/JNK(T183/Y185)	0.553675
p-FGFR1(Y653/654)	p-STAT3(Y705)	0.553568
p-FOXO3A(S253)	p-P38MAPK(T180/Y182)	0.552038
p-CDC2(Y15)	p-PKCD(T505)	0.549915
p-EGFR(Y1173)	p-EGFR(Y1068)	0.547299
p-ERBB4(Y1284)	p-JAK1(Y1022/1023)	0.547166
p-S6RIBPROT(S240/244)	p-PI3KP85(Y458)P55(Y199)	0.546942
p-IRS1(S1101)	p-JAK1(Y1022/1023)	0.546235
p-PLCG1(Y783)	p-PLCG2(Y759)	0.545058
p-EGFR(Y1068)	p-EGFR(Y1086)	0.54491
p-EGFR(Y1068)	p-EGFR(Y1173)	0.543678
p-MTOR(S2448)	p-RAF(C-)(S259)	0.542864
p-AKT(S473)	p-P90RSK(S380)	0.542534
p-KIT(C-)(Y719)	p-MET(Y1234/1235)	0.53846
p-SRC(Y527)	p-PTEN(S380)	0.538264
p-MTOR(S2448)	p-FAK(Y576/577)	0.538145
p-GSK3A(S21)	p-CRKII(Y221)	0.53741
p-SAPK/JNK(T183/Y185)	p-SHP2(Y542)	0.531429
p-PYK2(Y402)	p-SHP2(Y542)	0.530757
p-KIT(C-)(Y719)	p-PLCG2(Y759)	0.5307
p-IRS1(S1101)	p-PKCD(T505)	0.529804
p-P38MAPK(T180/Y182)	p-ERK1/2(T202/Y204)	0.525189
p-PDGFRB(Y1009)	p-PLCG2(Y759)	0.524995
p-RAF(C-)(S259)	p-GSK3A(S21)	0.523492
p-CDK2(T160)	p-S6RIBPROT(S240/244)	0.523057
p-PDFGRA(Y849)/PDGFRB(Y857)	p-PYK2(Y402)	0.522735
p-PDK1(S241)	p-GSK3A(S21)	0.522347
p-PLCG1(Y783)	p-MET(Y1234/1235)	0.520362
p-SRC(Y527)	p-CDK2(T160)	0.520113
p-P90RSK(S380)	p-GAB1(Y627)	0.519137
p-P70S6K(T421/S424)	p-CREB(S133)	0.517168
p-SYK(Y525/526)	p-PLCG2(Y759)	0.517068
p-FAK(Y576/577)	p-ERBB2(Y1221/1222)	0.516555
p-STAT3(S727)	p-SHC(Y239/240)	0.51635
p-SHP2(Y542)	p-STAT6(Y641)	0.516003
p-EGFR(Y1068)	p-EGFR(Y845)	0.515909
p-CRKL(Y207)	p-FOXO3A(S253)	0.515569
p-P90RSK(S380)	p-PKCD(T505)	0.515403
p-GSK3A(S21)	p-RAF(C-)(S259)	0.515325
p-4EBP1(T37/46)	p-4EBP1(S65)	0.514786
p-AKT(S473)	p-CDK2(T160)	0.514741
p-CDK2(T160)	p-AKT(S473)	0.514741
p-PI3KP85(Y458)P55(Y199)	p-SRC(Y527)	0.514216
p-SRC(Y527)	p-PI3KP85(Y458)P55(Y199)	0.514216
p-STAT3(Y705)	p-FGFR1(Y653/654)	0.514215
p-GAB1(Y627)	p-PYK2(Y402)	0.512866
p-FOXO3A(S253)	p-RAF(C-)(S259)	0.512056
p-FOXO1(S319)/FOXO4(S262)	p-AKT(S473)	0.511515
p-EGFR(Y1173)	p-PLCG2(Y759)	0.511431
p-SRC(Y527)	p-P38MAPK(T180/Y182)	0.509361
p-GAB2(S159)	p-RAF(C-)(S259)	0.509062
p-MEK(1/2)(S217/221)	p-P38MAPK(T180/Y182)	0.50902
p-PDGFRA(Y754)	p-IGF1RB(Y1135/1136)/INSRB	0.50828
p-P38MAPK(T180/Y182)	p-FOXO3A(S253)	0.508129
p-PYK2(Y402)	p-SYK(Y525/526)	0.505996
p-SRC(Y416)	p-EGFR(Y845)	0.50581
p-ABL(C-)(Y245)	p-MTOR(S2448)	0.504453
p-ABL(C-)(Y245)	p-RAF(C-)(S338)	0.504418
p-IRS1(S1101)	p-IGF1RB(Y1135/1136)/INSRB	0.503994
p-PKCPAN/G(T514)	p-PI3KP85(Y458)P55(Y199)	0.503891
p-EGFR(Y1086)	p-EGFR(Y1068)	0.503619
p-STAT5(Y694)	p-STAT1(Y701)	0.503341
p-SHC(Y239/240)	p-SAPK/JNK(T183/Y185)	0.502208
p-RAF(C-)(S338)	p-CRKII(Y221)	0.500518
p-RAF(C-)(S338)	p-P90RSK(S380)	0.498736
p-P38MAPK(T180/Y182)	p-CRKL(Y207)	0.498431
p-AKT(S473)	p-PI3KP85(Y458)P55(Y199)	0.496747
p-MET(Y1349)	p-EGFR(Y1068)	0.496198
p-PLCG2(Y759)	p-PLCG1(Y783)	0.495096
p-PLCG2(Y759)	p-EGFR(Y1086)	0.494451
p-SYK(Y525/526)	p-ERBB2(Y1221/1222)	0.494122
p-IRS1(S1101)	p-PDGFRA(Y754)	0.49402
p-SRC(Y527)	p-CDC2(Y15)	0.492968
p-SRC(Y416)	p-KIT(C-)(Y719)	0.491378
p-CRKII(Y221)	p-RAF(C-)(S338)	0.491153
p-P38MAPK(T180/Y182)	p-FOXO1(S319)/FOXO4(S262)	0.490112
p-P38MAPK(T180/Y182)	p-MEK(1/2)(S217/221)	0.490079
p-SRC(Y416)	p-FGFR1(Y653/654)	0.489214
p-MET(Y1234/1235)	p-PLCG1(Y783)	0.488787
p-PTEN(S380)	p-SRC(Y527)	0.488708
p-SRC(Y527)	p-SHC(Y239/240)	0.488662
p-SHP2(Y542)	p-PDGFRB(Y1009)	0.487866
p-GAB1(Y627)	p-PLCG1(Y783)	0.487324
p-FOXO3A(S253)	p-CRKL(Y207)	0.486512
p-FGFR1(Y653/654)	p-SRC(Y416)	0.486255
p-PI3KP85(Y458)P55(Y199)	p-CREB(S133)	0.48566
p-PTEN(S380)	p-RAF(C-)(S259)	0.485317
p-IGF1RB(Y1135/1136)/INSRB	p-PDGFRA(Y754)	0.484881
p-PKCD(T505)	p-RAF(C-)(S338)	0.484701
p-MET(Y1234/1235)	p-PLCG2(Y759)	0.484483
p-PTEN(S380)	p-CDC2(Y15)	0.483715
p-EGFR(Y845)	p-FGFR1(Y653/654)	0.483015
p-ERBB2(Y1221/1222)	p-CRKII(Y221)	0.482876
p-STAT5(Y694)	p-PLCG2(Y759)	0.482658
p-MET(Y1234/1235)	p-EGFR(Y1086)	0.482319
p-ABL(C-)(Y245)	p-P70S6K(T421/S424)	0.481837
p-STAT6(Y641)	p-EGFR(Y1086)	0.480019
p-SHC(Y239/240)	p-CDC2(Y15)	0.47996
p-P90RSK(S380)	p-SAPK/JNK(T183/Y185)	0.479065
p-GSK3A(S21)	p-IGF1RB(Y1135/1136)/INSRB	0.478178
p-STAT3(S727)	p-FOXO3A(S253)	0.476755
p-SRC(Y416)	p-STAT1(Y701)	0.476687
p-GAB2(S159)	p-SAPK/JNK(T183/Y185)	0.475839
p-ERK1/2(T202/Y204)	p-EGFR(Y1068)	0.474484
p-KIT(C-)(Y719)	p-FGFR1(Y653/654)	0.474382
p-P38MAPK(T180/Y182)	p-STAT3(S727)	0.473463
p-SYK(Y525/526)	p-SRC(Y416)	0.473015
p-CDK2(T160)	p-SRC(Y527)	0.472242
p-4EBP1(S65)	p-MEK(1/2)(S217/221)	0.471446
p-EGFR(Y1173)	p-PLCG1(Y783)	0.469557
p-ERBB4(Y1284)	p-FAK(Y576/577)	0.469476
p-FOXO3A(S253)	p-STAT3(S727)	0.468855
p-STAT3(S727)	p-P90RSK(S380)	0.468518
p-FGFR1(Y653/654)	p-PLCG2(Y759)	0.467673
p-SAPK/JNK(T183/Y185)	p-FOXO1(S319)/FOXO4(S262)	0.467237
p-P38MAPK(T180/Y182)	p-SAPK/JNK(T183/Y185)	0.467103
p-SAPK/JNK(T183/Y185)	p-P38MAPK(T180/Y182)	0.467103
p-PDGFRA(Y754)	p-IRS1(S1101)	0.466132
p-MET(Y1234/1235)	p-GAB1(Y627)	0.46589
p-PDK1(S241)	p-CRKII(Y221)	0.465712
p-P70S6K(T421/S424)	p-PI3KP85(Y458)P55(Y199)	0.464197
p-PTEN(S380)	p-MEK(1/2)(S217/221)	0.463708
p-IGF1RB(Y1135/1136)/INSRB	p-GSK3A(S21)	0.463554
p-GAB2(S159)	p-P38MAPK(T180/Y182)	0.463424
p-SRC(Y527)	p-P90RSK(S380)	0.463315
p-SAPK/JNK(T183/Y185)	p-SHC(Y239/240)	0.462312
p-ERBB4(Y1284)	p-STAT3(Y705)	0.461377
p-PDGFRA(Y754)	p-JAK1(Y1022/1023)	0.460981
p-SAPK/JNK(T183/Y185)	p-GAB2(S159)	0.460255
p-PDK1(S241)	p-CDC2(Y15)	0.459418
p-FAK(Y576/577)	p-PLCG2(Y759)	0.458377
p-PLCG2(Y759)	p-PDGFRB(Y1009)	0.458156
p-CDK2(T160)	p-PI3KP85(Y458)P55(Y199)	0.457901
p-PI3KP85(Y458)P55(Y199)	p-CDK2(T160)	0.457901
p-MET(Y1234/1235)	p-PYK2(Y402)	0.457276
p-IRS1(S1101)	p-RAF(C-)(S259)	0.45595
p-IRS1(S1101)	p-ABL(C-)(Y245)	0.45507
p-SHC(Y239/240)	p-JAK1(Y1022/1023)	0.453979
p-CREB(S133)	p-MEK(1/2)(S217/221)	0.453349
p-FAK(Y576/577)	p-STAT6(Y641)	0.452704
p-PKCPAN/G(T514)	p-P70S6K(T421/S424)	0.452035
p-PDGFRB(Y1009)	p-EGFR(Y1086)	0.450453
p-GAB1(Y627)	p-MET(Y1234/1235)	0.449796
p-FOXO3A(S253)	p-IRS1(S1101)	0.449681
p-JAK1(Y1022/1023)	p-STAT1(Y701)	0.449556
p-ERBB2(Y1221/1222)	p-STAT6(Y641)	0.449313
p-P70S6K(T421/S424)	p-RAF(C-)(S259)	0.448654
p-IRS1(S1101)	p-GAB2(S159)	0.448604
p-PYK2(Y402)	p-FGFR1(Y653/654)	0.448555
p-PLCG1(Y783)	p-PDGFRB(Y1009)	0.447764
p-SHC(Y239/240)	p-STAT3(S727)	0.447515
p-RAF(C-)(S259)	p-P90RSK(S380)	0.446435
p-PYK2(Y402)	p-GAB1(Y627)	0.446149
p-AKT(S473)	p-CRKL(Y207)	0.445905
p-CRKL(Y207)	p-AKT(S473)	0.445905
p-SRC(Y416)	p-EGFR(Y1086)	0.445098
p-PTEN(S380)	p-SAPK/JNK(T183/Y185)	0.444991
p-PKCD(T505)	p-IRS1(S1101)	0.444726
p-RAF(C-)(S338)	p-CDC2(Y15)	0.44465
p-4EBP1(S65)	p-CDC2(Y15)	0.44431
p-PLCG2(Y759)	p-FGFR1(Y653/654)	0.443389
p-PDGFRB(Y1009)	p-PLCG1(Y783)	0.443258
p-SHC(Y239/240)	p-SHP2(Y542)	0.442512
p-GAB2(S159)	p-GSK3A(S21)	0.441593
p-GAB1(Y627)	p-PDGFRB(Y1009)	0.441269
p-FOXO1(S319)/FOXO4(S262)	p-PLCG1(Y783)	0.441114
p-EGFR(Y1086)	p-STAT6(Y641)	0.440356
p-GAB2(S159)	p-AKT(S473)	0.4381
p-SYK(Y525/526)	p-STAT6(Y641)	0.437445
p-FOXO3A(S253)	p-CDK2(T160)	0.436521
p-CRKL(Y207)	p-CDK2(T160)	0.436377
p-P70S6K(T421/S424)	p-CDK2(T160)	0.436376
p-MET(Y1234/1235)	p-STAT3(Y705)	0.436369
p-FOXO1(S319)/FOXO4(S262)	p-CDK2(T160)	0.435875
p-PLCG1(Y783)	p-SYK(Y525/526)	0.435734
p-SYK(Y525/526)	p-PLCG1(Y783)	0.435734
p-GAB2(S159)	p-IGF1RB(Y1135/1136)/INSRB	0.435679
p-PKCD(T505)	p-GSK3A(S21)	0.434716
p-MET(Y1234/1235)	p-FGFR1(Y653/654)	0.434041
p-PLCG2(Y759)	p-KIT(C-)(Y719)	0.43383
p-PDFGRA(Y849)/PDGFRB(Y857)	p-STAT6(Y641)	0.433407
p-PKCD(T505)	p-ZAP70(Y319)/SYK(Y352)	0.433398
p-ZAP70(Y319)/SYK(Y352)	p-PKCD(T505)	0.433398
p-SRC(Y416)	p-EGFR(Y1068)	0.433323
p-RAF(C-)(S338)	p-PKCD(T505)	0.431706
p-PLCG1(Y783)	p-SHP2(Y542)	0.43129
p-CRKII(Y221)	p-GSK3A(S21)	0.431141
p-PDFGRA(Y849)/PDGFRB(Y857)	p-SHP2(Y542)	0.430847
p-SHP2(Y542)	p-PDFGRA(Y849)/PDGFRB(Y857)	0.430847
p-FGFR1(Y653/654)	p-KIT(C-)(Y719)	0.430569
p-4EBP1(T37/46)	p-MTOR(S2448)	0.430328
p-EGFR(Y845)	p-PLCG2(Y759)	0.430249
p-PLCG2(Y759)	p-EGFR(Y845)	0.430249
p-RAF(C-)(S259)	p-FOXO3A(S253)	0.43001
p-PDGFRA(Y754)	p-GSK3A(S21)	0.4281
p-MTOR(S2448)	p-PLCG1(Y783)	0.427923
p-PDGFRA(Y754)	p-STAT3(S727)	0.427438
p-4EBP1(T37/46)	p-AKT(S473)	0.427119
p-EGFR(Y1173)	p-EGFR(Y1086)	0.425919
p-GAB1(Y627)	p-PI3KP85(Y458)P55(Y199)	0.425903
p-RAF(C-)(S259)	p-MTOR(S2448)	0.425361
p-CDC2(Y15)	p-SHC(Y239/240)	0.424778
p-PDGFRB(Y1009)	p-STAT6(Y641)	0.424459
p-CREB(S133)	p-CDK2(T160)	0.423973
p-P70S6K(T421/S424)	p-CRKII(Y221)	0.423468
p-PLCG1(Y783)	p-STAT1(Y701)	0.42331
p-PDGFRA(Y754)	p-4EBP1(S65)	0.423283
p-FGFR1(Y653/654)	p-MET(Y1234/1235)	0.423176
p-EGFR(Y1068)	p-FGFR1(Y653/654)	0.422896
p-GAB1(Y627)	p-EGFR(Y845)	0.42215
p-IRS1(S1101)	p-FOXO3A(S253)	0.421578
p-P38MAPK(T180/Y182)	p-GAB2(S159)	0.421517
p-FOXO3A(S253)	p-PDK1(S241)	0.420743
p-PKCD(T505)	p-P90RSK(S380)	0.420712
p-STAT5(Y694)	p-EGFR(Y1086)	0.420203
p-EGFR(Y1173)	p-GAB1(Y627)	0.419992
p-P90RSK(S380)	p-CDK2(T160)	0.419537
p-IGF1RB(Y1135/1136)/INSRB	p-IRS1(S1101)	0.419125
p-STAT6(Y641)	p-SYK(Y525/526)	0.419087
p-EGFR(Y845)	p-SRC(Y416)	0.418145
p-RAF(C-)(S338)	p-P70S6K(T421/S424)	0.416036
p-CDC2(Y15)	p-GSK3A(S21)	0.415915
p-GSK3A(S21)	p-CDC2(Y15)	0.415915
p-PI3KP85(Y458)P55(Y199)	p-P90RSK(S380)	0.415709
p-P90RSK(S380)	p-PI3KP85(Y458)P55(Y199)	0.415709
p-MTOR(S2448)	p-STAT3(S727)	0.415511
p-GAB2(S159)	p-PTEN(S380)	0.415213
p-P90RSK(S380)	p-CREB(S133)	0.414575
p-FOXO1(S319)/FOXO4(S262)	p-S6RIBPROT(S240/244)	0.413748
p-S6RIBPROT(S240/244)	p-FOXO1(S319)/FOXO4(S262)	0.413748
p-PI3KP85(Y458)P55(Y199)	p-AKT(S473)	0.413606
p-ZAP70(Y319)/SYK(Y352)	p-STAT6(Y641)	0.413456
p-STAT5(Y694)	p-FGFR1(Y653/654)	0.41176
p-PI3KP85(Y458)P55(Y199)	p-ABL(C-)(Y245)	0.411555
p-FAK(Y576/577)	p-ABL(C-)(Y245)	0.411525
p-PTEN(S380)	p-GAB2(S159)	0.411313
p-EGFR(Y1086)	p-PLCG2(Y759)	0.410749
p-ERBB2(Y1221/1222)	p-FGFR1(Y653/654)	0.410267
p-ERK1/2(T202/Y204)	p-P38MAPK(T180/Y182)	0.410102
p-EGFR(Y1068)	p-SRC(Y416)	0.409266
p-GSK3A(S21)	p-P70S6K(T421/S424)	0.408332
p-EGFR(Y1173)	p-FGFR1(Y653/654)	0.408138
p-P38MAPK(T180/Y182)	p-PI3KP85(Y458)P55(Y199)	0.408075
p-JAK1(Y1022/1023)	p-PDGFRA(Y754)	0.407969
p-MTOR(S2448)	p-SHC(Y239/240)	0.407714
p-STAT5(Y694)	p-PDGFRB(Y1009)	0.407566
p-GSK3A(S21)	p-P90RSK(S380)	0.407069
p-P90RSK(S380)	p-GSK3A(S21)	0.406979
p-STAT3(Y705)	p-STAT5(Y694)	0.406812
p-FAK(Y576/577)	p-CRKII(Y221)	0.406566
p-STAT5(Y694)	p-SHP2(Y542)	0.4058
p-STAT3(Y705)	p-SRC(Y416)	0.404973
p-EGFR(Y1068)	p-PLCG1(Y783)	0.404621
p-STAT3(Y705)	p-PLCG1(Y783)	0.40436
p-PLCG2(Y759)	p-FAK(Y576/577)	0.404288
p-IGF1RB(Y1135/1136)/INSRB	p-JAK1(Y1022/1023)	0.402708
p-AKT(S473)	p-FOXO1(S319)/FOXO4(S262)	0.401938
p-EGFR(Y845)	p-KIT(C-)(Y719)	0.401887
p-SYK(Y525/526)	p-FGFR1(Y653/654)	0.401152
p-SRC(Y416)	p-ERBB2(Y1221/1222)	0.400982
p-PI3KP85(Y458)P55(Y199)	p-CDC2(Y15)	0.400868
p-FGFR1(Y653/654)	p-PDFGRA(Y849)/PDGFRB(Y857)	0.400669
p-GAB1(Y627)	p-SHP2(Y542)	0.399961
p-PLCG2(Y759)	p-SYK(Y525/526)	0.397597
p-FAK(Y576/577)	p-FGFR1(Y653/654)	0.397381
p-P90RSK(S380)	p-GAB2(S159)	0.397216
p-CDC2(Y15)	p-STAT3(S727)	0.397055
p-STAT3(S727)	p-CDC2(Y15)	0.397055
p-JAK1(Y1022/1023)	p-RAF(C-)(S338)	0.396485
p-MTOR(S2448)	p-IRS1(S1101)	0.396304
p-IRS1(S1101)	p-MTOR(S2448)	0.396304
p-SRC(Y416)	p-GAB1(Y627)	0.39568
p-PDGFRB(Y1009)	p-PYK2(Y402)	0.395337
p-STAT1(Y701)	p-SHP2(Y542)	0.395169
p-PTEN(S380)	p-SHC(Y239/240)	0.395024
p-SHP2(Y542)	p-STAT1(Y701)	0.393586
p-IRS1(S1101)	p-SRC(Y527)	0.393159
p-GSK3A(S21)	p-GAB2(S159)	0.39303
p-CDC2(Y15)	p-STAT5(Y694)	0.393028
p-IRS1(S1101)	p-P90RSK(S380)	0.392952
p-SRC(Y527)	p-FOXO1(S319)/FOXO4(S262)	0.392816
p-STAT3(S727)	p-P38MAPK(T180/Y182)	0.392627
p-CREB(S133)	p-P90RSK(S380)	0.392271
p-ERBB2(Y1221/1222)	p-ERBB4(Y1284)	0.392062
p-CRKL(Y207)	p-FOXO1(S319)/FOXO4(S262)	0.391584
p-PI3KP85(Y458)P55(Y199)	p-P38MAPK(T180/Y182)	0.39138
p-SAPK/JNK(T183/Y185)	p-CDC2(Y15)	0.391239
p-ERK1/2(T202/Y204)	p-CDC2(Y15)	0.391139
p-IRS1(S1101)	p-KIT(C-)(Y719)	0.390999
p-SHC(Y239/240)	p-GAB2(S159)	0.390641
p-FOXO3A(S253)	p-PTEN(S380)	0.389984
p-ABL(C-)(Y245)	p-SRC(Y527)	0.389864
p-IRS1(S1101)	p-PDK1(S241)	0.389422
p-PDK1(S241)	p-IRS1(S1101)	0.389422
p-PDK1(S241)	p-AKT(S473)	0.388256
p-PTEN(S380)	p-CREB(S133)	0.387582
p-CDK2(T160)	p-FOXO3A(S253)	0.387266
p-4EBP1(S65)	p-P38MAPK(T180/Y182)	0.386877
p-PLCG1(Y783)	p-ERK1/2(T202/Y204)	0.386668
p-GAB2(S159)	p-PDGFRA(Y754)	0.38542
p-FOXO3A(S253)	p-PI3KP85(Y458)P55(Y199)	0.384629
p-GAB2(S159)	p-SRC(Y527)	0.384215
p-SHC(Y239/240)	p-GAB1(Y627)	0.383713
p-EGFR(Y1068)	p-PLCG2(Y759)	0.383567
p-PLCG2(Y759)	p-EGFR(Y1068)	0.383567
p-PDK1(S241)	p-PKCD(T505)	0.383312
p-GAB2(S159)	p-FOXO3A(S253)	0.383168
p-EGFR(Y1068)	p-MET(Y1234/1235)	0.382863
p-MET(Y1234/1235)	p-EGFR(Y1068)	0.382863
p-FOXO3A(S253)	p-PKCD(T505)	0.382381
p-CDC2(Y15)	p-4EBP1(S65)	0.381717
p-AKT(S473)	p-SRC(Y527)	0.381617
p-SRC(Y527)	p-AKT(S473)	0.381617
p-SHP2(Y542)	p-PLCG2(Y759)	0.381528
p-PLCG1(Y783)	p-EGFR(Y1173)	0.380865
p-JAK1(Y1022/1023)	p-PDFGRA(Y849)/PDGFRB(Y857)	0.380156
p-4EBP1(S65)	p-SRC(Y416)	0.380112
p-P38MAPK(T180/Y182)	p-SHC(Y239/240)	0.379769
p-EGFR(Y1173)	p-SRC(Y416)	0.379509
p-SRC(Y416)	p-EGFR(Y1173)	0.379509
p-SHP2(Y542)	p-EGFR(Y1086)	0.378664
p-IGF1RB(Y1135/1136)/INSRB	p-GAB2(S159)	0.37865
p-MET(Y1234/1235)	p-SRC(Y416)	0.378607
p-SRC(Y416)	p-MET(Y1234/1235)	0.378607
p-P38MAPK(T180/Y182)	p-CDC2(Y15)	0.378455
p-RAF(C-)(S259)	p-IRS1(S1101)	0.378368
p-PDFGRA(Y849)/PDGFRB(Y857)	p-EGFR(Y1068)	0.378057
p-CDC2(Y15)	p-SRC(Y527)	0.376991
p-SYK(Y525/526)	p-STAT5(Y694)	0.376887
p-PI3KP85(Y458)P55(Y199)	p-PDGFRB(Y1009)	0.375937
p-GAB1(Y627)	p-P90RSK(S380)	0.375093
p-PDGFRB(Y1009)	p-PI3KP85(Y458)P55(Y199)	0.3747
p-CDC2(Y15)	p-PTEN(S380)	0.37451
p-CDK2(T160)	p-FOXO1(S319)/FOXO4(S262)	0.374451
p-ZAP70(Y319)/SYK(Y352)	p-IRS1(S1101)	0.374111
p-SAPK/JNK(T183/Y185)	p-GAB1(Y627)	0.374057
p-PDFGRA(Y849)/PDGFRB(Y857)	p-STAT1(Y701)	0.373123
p-PI3KP85(Y458)P55(Y199)	p-SHC(Y239/240)	0.372591
p-GAB1(Y627)	p-PDGFRA(Y754)	0.372315
p-STAT6(Y641)	p-FGFR1(Y653/654)	0.372102
p-ERK1/2(T202/Y204)	p-GAB1(Y627)	0.371491
p-4EBP1(S65)	p-STAT3(Y705)	0.371343
p-STAT3(Y705)	p-4EBP1(S65)	0.371343
p-ERBB2(Y1221/1222)	p-ABL(C-)(Y245)	0.369911
p-MET(Y1349)	p-PDGFRA(Y754)	0.369811
p-ERBB2(Y1221/1222)	p-MET(Y1234/1235)	0.369149
p-STAT6(Y641)	p-SHP2(Y542)	0.368848
p-FGFR1(Y653/654)	p-EGFR(Y845)	0.36805
p-CDC2(Y15)	p-PDK1(S241)	0.368011
p-GSK3A(S21)	p-4EBP1(S65)	0.367041
p-PKCD(T505)	p-CDC2(Y15)	0.366364
p-FGFR1(Y653/654)	p-JAK1(Y1022/1023)	0.364852
p-CDC2(Y15)	p-PDFGRA(Y849)/PDGFRB(Y857)	0.364699
p-ERK1/2(T202/Y204)	p-PDGFRA(Y754)	0.363774
p-STAT1(Y701)	p-FGFR1(Y653/654)	0.363575
p-RAF(C-)(S338)	p-JAK1(Y1022/1023)	0.362876
p-EGFR(Y845)	p-SYK(Y525/526)	0.362434
p-SYK(Y525/526)	p-EGFR(Y845)	0.362434
p-GSK3A(S21)	p-JAK1(Y1022/1023)	0.362069
p-PDK1(S241)	p-RAF(C-)(S338)	0.360846
p-RAF(C-)(S338)	p-PDK1(S241)	0.360846
p-IGF1RB(Y1135/1136)/INSRB	p-PKCD(T505)	0.360811
p-STAT5(Y694)	p-ABL(C-)(Y245)	0.360568
p-STAT1(Y701)	p-STAT5(Y694)	0.360216
p-CDK2(T160)	p-P38MAPK(T180/Y182)	0.35982
p-4EBP1(T37/46)	p-IRS1(S1101)	0.359473
p-IRS1(S1101)	p-4EBP1(T37/46)	0.359473
p-PI3KP85(Y458)P55(Y199)	p-PKCPAN/G(T514)	0.358935
p-EGFR(Y1086)	p-SYK(Y525/526)	0.358824
p-CDC2(Y15)	p-KIT(C-)(Y719)	0.357968
p-SHP2(Y542)	p-SYK(Y525/526)	0.357482
p-SYK(Y525/526)	p-SHP2(Y542)	0.357482
p-PDGFRB(Y1009)	p-STAT5(Y694)	0.356253
p-EGFR(Y845)	p-STAT3(Y705)	0.356116
p-STAT3(Y705)	p-EGFR(Y845)	0.356116
p-PDGFRB(Y1009)	p-EGFR(Y1068)	0.355131
p-RAF(C-)(S259)	p-PTEN(S380)	0.355021
p-JAK1(Y1022/1023)	p-IRS1(S1101)	0.354343
p-CDC2(Y15)	p-ABL(C-)(Y245)	0.353945
p-EGFR(Y1173)	p-KIT(C-)(Y719)	0.353878
p-EGFR(Y1173)	p-PYK2(Y402)	0.353654
p-PYK2(Y402)	p-EGFR(Y1173)	0.353654
p-EGFR(Y1086)	p-SHP2(Y542)	0.353526
p-ERK1/2(T202/Y204)	p-PLCG1(Y783)	0.353365
p-CDC2(Y15)	p-IGF1RB(Y1135/1136)/INSRB	0.353251
p-IGF1RB(Y1135/1136)/INSRB	p-CDC2(Y15)	0.353251
p-CDC2(Y15)	p-GAB2(S159)	0.352843
p-ERBB2(Y1221/1222)	p-SRC(Y416)	0.352436
p-STAT3(S727)	p-CREB(S133)	0.350796
p-CDC2(Y15)	p-RAF(C-)(S338)	0.350292
p-SHP2(Y542)	p-FGFR1(Y653/654)	0.350139
p-CDK2(T160)	p-P70S6K(T421/S424)	0.349154
p-PDFGRA(Y849)/PDGFRB(Y857)	p-ERBB4(Y1284)	0.348972
p-KIT(C-)(Y719)	p-ERK1/2(T202/Y204)	0.34891
p-PDK1(S241)	p-CREB(S133)	0.34887
p-GAB1(Y627)	p-SRC(Y416)	0.347978
p-4EBP1(T37/46)	p-KIT(C-)(Y719)	0.347842
p-STAT1(Y701)	p-JAK1(Y1022/1023)	0.347622
p-PLCG2(Y759)	p-STAT6(Y641)	0.347614
p-STAT6(Y641)	p-PLCG2(Y759)	0.347614
p-GAB1(Y627)	p-FOXO1(S319)/FOXO4(S262)	0.347081
p-JAK1(Y1022/1023)	p-CDC2(Y15)	0.346869
p-ERK1/2(T202/Y204)	p-STAT6(Y641)	0.346841
p-FOXO3A(S253)	p-SRC(Y527)	0.346029
p-PDFGRA(Y849)/PDGFRB(Y857)	p-FGFR1(Y653/654)	0.345671
p-ERK1/2(T202/Y204)	p-KIT(C-)(Y719)	0.34551
p-SHC(Y239/240)	p-PTEN(S380)	0.345387
p-PDGFRB(Y1009)	p-PKCD(T505)	0.3451
p-IRS1(S1101)	p-CREB(S133)	0.344735
p-PDGFRA(Y754)	p-GAB2(S159)	0.344434
p-SHP2(Y542)	p-PLCG1(Y783)	0.344374
p-SAPK/JNK(T183/Y185)	p-SRC(Y527)	0.344245
p-4EBP1(S65)	p-IRS1(S1101)	0.343573
p-IRS1(S1101)	p-4EBP1(S65)	0.343573
p-GAB2(S159)	p-FOXO1(S319)/FOXO4(S262)	0.343386
p-PDK1(S241)	p-RAF(C-)(S259)	0.343112
p-RAF(C-)(S259)	p-PDK1(S241)	0.343112
p-STAT3(Y705)	p-MET(Y1234/1235)	0.342955
p-FAK(Y576/577)	p-MTOR(S2448)	0.342403
p-STAT1(Y701)	p-PYK2(Y402)	0.342397
p-P38MAPK(T180/Y182)	p-4EBP1(S65)	0.341908
p-GAB1(Y627)	p-GAB2(S159)	0.341657
p-PDK1(S241)	p-P90RSK(S380)	0.340314
p-PYK2(Y402)	p-MET(Y1234/1235)	0.340251
p-EGFR(Y1086)	p-STAT5(Y694)	0.339836
p-ERBB2(Y1221/1222)	p-FAK(Y576/577)	0.338163
p-CRKII(Y221)	p-PDK1(S241)	0.337802
p-SAPK/JNK(T183/Y185)	p-PTEN(S380)	0.33735
p-PDFGRA(Y849)/PDGFRB(Y857)	p-JAK1(Y1022/1023)	0.337252
p-CDC2(Y15)	p-FOXO3A(S253)	0.337174
p-FOXO3A(S253)	p-CDC2(Y15)	0.337174
p-MEK(1/2)(S217/221)	p-PKCD(T505)	0.337142
p-EGFR(Y845)	p-STAT5(Y694)	0.336938
p-EGFR(Y1086)	p-SRC(Y416)	0.336561
p-SRC(Y416)	p-PDGFRB(Y1009)	0.336259
p-GAB1(Y627)	p-EGFR(Y1173)	0.336145
p-PLCG2(Y759)	p-PYK2(Y402)	0.335761
p-PYK2(Y402)	p-PLCG2(Y759)	0.335761
p-CDK2(T160)	p-CREB(S133)	0.33576
p-RAF(C-)(S259)	p-SAPK/JNK(T183/Y185)	0.335155
p-GAB1(Y627)	p-PTEN(S380)	0.334871
p-CDK2(T160)	p-CRKL(Y207)	0.334786
p-EGFR(Y1086)	p-PLCG1(Y783)	0.33471
p-S6RIBPROT(S240/244)	p-RAF(C-)(S259)	0.334682
p-PDGFRB(Y1009)	p-SRC(Y416)	0.334542
p-MTOR(S2448)	p-FOXO1(S319)/FOXO4(S262)	0.333665
p-MEK(1/2)(S217/221)	p-4EBP1(S65)	0.333089
p-PDFGRA(Y849)/PDGFRB(Y857)	p-EGFR(Y1086)	0.332608
p-MEK(1/2)(S217/221)	p-PTEN(S380)	0.332251
p-GAB1(Y627)	p-KIT(C-)(Y719)	0.331525
p-PDFGRA(Y849)/PDGFRB(Y857)	p-STAT5(Y694)	0.331387
p-ERBB2(Y1221/1222)	p-PLCG2(Y759)	0.331201
p-MTOR(S2448)	p-GAB2(S159)	0.330635
p-PI3KP85(Y458)P55(Y199)	p-P70S6K(T421/S424)	0.329669
p-EGFR(Y1068)	p-KIT(C-)(Y719)	0.329643
p-P70S6K(T421/S424)	p-FOXO1(S319)/FOXO4(S262)	0.329614
p-PLCG1(Y783)	p-PDFGRA(Y849)/PDGFRB(Y857)	0.32876
p-GAB1(Y627)	p-MEK(1/2)(S217/221)	0.328085
p-MEK(1/2)(S217/221)	p-GAB1(Y627)	0.328085
p-RAF(C-)(S259)	p-GAB2(S159)	0.327864
p-EGFR(Y1086)	p-FGFR1(Y653/654)	0.327826
p-FGFR1(Y653/654)	p-EGFR(Y1086)	0.327826
p-CDC2(Y15)	p-CREB(S133)	0.327325
p-PDFGRA(Y849)/PDGFRB(Y857)	p-PLCG2(Y759)	0.32726
p-PLCG2(Y759)	p-PDFGRA(Y849)/PDGFRB(Y857)	0.32726
p-CRKII(Y221)	p-JAK1(Y1022/1023)	0.327202
p-JAK1(Y1022/1023)	p-CRKII(Y221)	0.327202
p-PDFGRA(Y849)/PDGFRB(Y857)	p-PKCD(T505)	0.327147
p-SHC(Y239/240)	p-SRC(Y527)	0.327009
p-AKT(S473)	p-CRKII(Y221)	0.326566
p-PYK2(Y402)	p-STAT6(Y641)	0.324703
p-STAT6(Y641)	p-PYK2(Y402)	0.324703
p-AKT(S473)	p-P70S6K(T421/S424)	0.324687
p-P70S6K(T421/S424)	p-AKT(S473)	0.324687
p-EGFR(Y1068)	p-STAT5(Y694)	0.324615
p-EGFR(Y1068)	p-FAK(Y576/577)	0.324477
p-PI3KP85(Y458)P55(Y199)	p-MEK(1/2)(S217/221)	0.324041
p-CDC2(Y15)	p-IRS1(S1101)	0.323864
p-IRS1(S1101)	p-CDC2(Y15)	0.323864
p-EGFR(Y1086)	p-MET(Y1234/1235)	0.323788
p-JAK1(Y1022/1023)	p-MET(Y1349)	0.323779
p-MET(Y1349)	p-JAK1(Y1022/1023)	0.323779
p-EGFR(Y845)	p-4EBP1(T37/46)	0.323522
p-4EBP1(T37/46)	p-EGFR(Y845)	0.323522
p-STAT1(Y701)	p-SRC(Y416)	0.323306
p-MEK(1/2)(S217/221)	p-CREB(S133)	0.322058
p-MEK(1/2)(S217/221)	p-GAB2(S159)	0.321698
p-4EBP1(T37/46)	p-GAB2(S159)	0.321333
p-FOXO1(S319)/FOXO4(S262)	p-GAB2(S159)	0.32059
p-PLCG1(Y783)	p-EGFR(Y1068)	0.319837
p-EGFR(Y1068)	p-ERK1/2(T202/Y204)	0.319737
p-PLCG1(Y783)	p-GAB1(Y627)	0.319457
p-STAT1(Y701)	p-KIT(C-)(Y719)	0.318874
p-PYK2(Y402)	p-STAT3(Y705)	0.318097
p-STAT3(Y705)	p-PYK2(Y402)	0.318097
p-RAF(C-)(S259)	p-CREB(S133)	0.317824
p-STAT6(Y641)	p-PDFGRA(Y849)/PDGFRB(Y857)	0.317803
p-S6RIBPROT(S240/244)	p-P90RSK(S380)	0.317677
p-SRC(Y527)	p-ABL(C-)(Y245)	0.317657
p-STAT3(Y705)	p-KIT(C-)(Y719)	0.316927
p-JAK1(Y1022/1023)	p-EGFR(Y1086)	0.316874
p-PKCD(T505)	p-PDK1(S241)	0.316633
p-PLCG2(Y759)	p-JAK1(Y1022/1023)	0.315769
p-FGFR1(Y653/654)	p-ERBB2(Y1221/1222)	0.315738
p-PDGFRB(Y1009)	p-PTEN(S380)	0.315647
p-CDK2(T160)	p-P90RSK(S380)	0.315488
p-PDK1(S241)	p-CDK2(T160)	0.315424
p-CRKII(Y221)	p-ZAP70(Y319)/SYK(Y352)	0.315104
p-ZAP70(Y319)/SYK(Y352)	p-CRKII(Y221)	0.315104
p-P38MAPK(T180/Y182)	p-SRC(Y527)	0.314758
p-PLCG2(Y759)	p-STAT1(Y701)	0.314621
p-STAT1(Y701)	p-PLCG2(Y759)	0.314621
p-GAB1(Y627)	p-SRC(Y527)	0.314392
p-SHP2(Y542)	p-4EBP1(T37/46)	0.313803
p-ERBB4(Y1284)	p-ABL(C-)(Y245)	0.313509
p-STAT6(Y641)	p-FAK(Y576/577)	0.312797
p-PDFGRA(Y849)/PDGFRB(Y857)	p-CDC2(Y15)	0.31279
p-PDFGRA(Y849)/PDGFRB(Y857)	p-CRKII(Y221)	0.312601
p-CRKII(Y221)	p-P90RSK(S380)	0.31156
p-STAT1(Y701)	p-ERK1/2(T202/Y204)	0.311525
p-FGFR1(Y653/654)	p-SYK(Y525/526)	0.311051
p-FOXO1(S319)/FOXO4(S262)	p-PTEN(S380)	0.310543
p-FOXO3A(S253)	p-GAB2(S159)	0.310436
p-EGFR(Y1068)	p-SYK(Y525/526)	0.31027
p-SYK(Y525/526)	p-EGFR(Y1068)	0.31027
p-JAK1(Y1022/1023)	p-IGF1RB(Y1135/1136)/INSRB	0.309684
p-GAB1(Y627)	p-PKCD(T505)	0.30806
p-PKCD(T505)	p-CDK2(T160)	0.3079
p-MET(Y1234/1235)	p-PDGFRB(Y1009)	0.307565
p-PDGFRB(Y1009)	p-MET(Y1234/1235)	0.307565
p-EGFR(Y1068)	p-STAT1(Y701)	0.306533
p-EGFR(Y845)	p-PYK2(Y402)	0.305501
p-PYK2(Y402)	p-EGFR(Y845)	0.305501
p-ERBB2(Y1221/1222)	p-EGFR(Y1086)	0.305044
p-FGFR1(Y653/654)	p-EGFR(Y1068)	0.304802
p-SHP2(Y542)	p-STAT5(Y694)	0.303793
p-EGFR(Y845)	p-SAPK/JNK(T183/Y185)	0.303438
p-SAPK/JNK(T183/Y185)	p-EGFR(Y845)	0.303438
p-GSK3A(S21)	p-PDGFRA(Y754)	0.302233
p-SHP2(Y542)	p-ABL(C-)(Y245)	0.301463
p-PDGFRA(Y754)	p-ZAP70(Y319)/SYK(Y352)	0.301242
p-ZAP70(Y319)/SYK(Y352)	p-PDGFRA(Y754)	0.301242
p-MET(Y1349)	p-SHC(Y239/240)	0.301197
p-STAT3(S727)	p-MTOR(S2448)	0.300627
p-RAF(C-)(S259)	p-SRC(Y527)	0.29988
p-CREB(S133)	p-S6RIBPROT(S240/244)	0.299495
p-S6RIBPROT(S240/244)	p-CREB(S133)	0.299495
p-PLCG1(Y783)	p-SAPK/JNK(T183/Y185)	0.299369
p-CREB(S133)	p-GAB2(S159)	0.299065
p-P90RSK(S380)	p-FOXO1(S319)/FOXO4(S262)	0.29906
p-EGFR(Y1173)	p-SYK(Y525/526)	0.298962
p-SYK(Y525/526)	p-EGFR(Y1173)	0.298962
p-PKCD(T505)	p-SRC(Y527)	0.298787
p-CDC2(Y15)	p-FOXO1(S319)/FOXO4(S262)	0.297629
p-JAK1(Y1022/1023)	p-PKCD(T505)	0.297063
p-PKCD(T505)	p-JAK1(Y1022/1023)	0.297063
p-P38MAPK(T180/Y182)	p-P90RSK(S380)	0.297043
p-P38MAPK(T180/Y182)	p-PLCG1(Y783)	0.296927
p-FOXO1(S319)/FOXO4(S262)	p-SRC(Y527)	0.296451
p-SHC(Y239/240)	p-KIT(C-)(Y719)	0.2962
p-GAB1(Y627)	p-EGFR(Y1086)	0.296094
p-PDFGRA(Y849)/PDGFRB(Y857)	p-PDGFRB(Y1009)	0.296016
p-PDGFRB(Y1009)	p-PDFGRA(Y849)/PDGFRB(Y857)	0.296016
p-RAF(C-)(S338)	p-ABL(C-)(Y245)	0.295951
p-P38MAPK(T180/Y182)	p-S6RIBPROT(S240/244)	0.295421
p-S6RIBPROT(S240/244)	p-P38MAPK(T180/Y182)	0.295421
p-GAB1(Y627)	p-SHC(Y239/240)	0.29527
p-IGF1RB(Y1135/1136)/INSRB	p-P90RSK(S380)	0.294981
p-ERBB2(Y1221/1222)	p-STAT3(Y705)	0.294808
p-STAT3(Y705)	p-ERBB2(Y1221/1222)	0.294808
p-RAF(C-)(S259)	p-STAT3(S727)	0.294691
p-STAT3(S727)	p-RAF(C-)(S259)	0.294691
p-SHP2(Y542)	p-SAPK/JNK(T183/Y185)	0.293786
p-FAK(Y576/577)	p-PDGFRB(Y1009)	0.29341
p-MET(Y1349)	p-EGFR(Y1086)	0.293348
p-EGFR(Y1173)	p-ABL(C-)(Y245)	0.292923
p-P70S6K(T421/S424)	p-PLCG1(Y783)	0.292921
p-PLCG2(Y759)	p-SHP2(Y542)	0.292641
p-P90RSK(S380)	p-SRC(Y527)	0.2923
p-IRS1(S1101)	p-RAF(C-)(S338)	0.291794
p-RAF(C-)(S338)	p-IRS1(S1101)	0.291794
p-FAK(Y576/577)	p-SRC(Y416)	0.291504
p-PDGFRA(Y754)	p-ERK1/2(T202/Y204)	0.291475
p-P70S6K(T421/S424)	p-RAF(C-)(S338)	0.291272
p-PDFGRA(Y849)/PDGFRB(Y857)	p-PLCG1(Y783)	0.291142
p-ERK1/2(T202/Y204)	p-SHC(Y239/240)	0.290825
p-GAB1(Y627)	p-SYK(Y525/526)	0.290589
p-SYK(Y525/526)	p-GAB1(Y627)	0.290589
p-SRC(Y527)	p-SAPK/JNK(T183/Y185)	0.290218
p-MET(Y1349)	p-P90RSK(S380)	0.288101
p-JAK1(Y1022/1023)	p-4EBP1(S65)	0.287705
p-SRC(Y527)	p-GAB2(S159)	0.287421
p-ZAP70(Y319)/SYK(Y352)	p-4EBP1(S65)	0.286878
p-SHP2(Y542)	p-SRC(Y416)	0.286833
p-SRC(Y416)	p-SHP2(Y542)	0.286833
p-FGFR1(Y653/654)	p-CRKL(Y207)	0.285995
p-ERBB4(Y1284)	p-PYK2(Y402)	0.285988
p-PYK2(Y402)	p-ERBB4(Y1284)	0.285988
p-EGFR(Y1086)	p-PYK2(Y402)	0.284604
p-PYK2(Y402)	p-EGFR(Y1086)	0.284604
p-KIT(C-)(Y719)	p-PYK2(Y402)	0.283272
p-PYK2(Y402)	p-KIT(C-)(Y719)	0.283272
p-KIT(C-)(Y719)	p-SYK(Y525/526)	0.283232
p-SYK(Y525/526)	p-KIT(C-)(Y719)	0.283232
p-MEK(1/2)(S217/221)	p-FOXO1(S319)/FOXO4(S262)	0.282119
p-S6RIBPROT(S240/244)	p-CRKII(Y221)	0.280594
p-PLCG2(Y759)	p-STAT5(Y694)	0.279977
p-EGFR(Y1086)	p-FAK(Y576/577)	0.279899
p-FAK(Y576/577)	p-EGFR(Y1086)	0.279899
p-JAK1(Y1022/1023)	p-SYK(Y525/526)	0.279418
p-SYK(Y525/526)	p-JAK1(Y1022/1023)	0.279418
p-4EBP1(S65)	p-STAT1(Y701)	0.279067
p-EGFR(Y1068)	p-PDFGRA(Y849)/PDGFRB(Y857)	0.278684
p-S6RIBPROT(S240/244)	p-P70S6K(T421/S424)	0.278016
p-P70S6K(T421/S424)	p-S6RIBPROT(S240/244)	0.278016
p-MET(Y1349)	p-STAT3(Y705)	0.277688
p-STAT3(Y705)	p-MET(Y1349)	0.277688
p-EGFR(Y1086)	p-STAT1(Y701)	0.276485
p-STAT1(Y701)	p-EGFR(Y1086)	0.276485
p-4EBP1(S65)	p-ERK1/2(T202/Y204)	0.275732
p-ERK1/2(T202/Y204)	p-4EBP1(S65)	0.275732
p-CDC2(Y15)	p-RAF(C-)(S259)	0.275704
p-RAF(C-)(S259)	p-CDC2(Y15)	0.275704
p-CDC2(Y15)	p-SAPK/JNK(T183/Y185)	0.275604
p-PDGFRB(Y1009)	p-MEK(1/2)(S217/221)	0.275445
p-PDFGRA(Y849)/PDGFRB(Y857)	p-KIT(C-)(Y719)	0.275245
p-STAT1(Y701)	p-SYK(Y525/526)	0.274638
p-SYK(Y525/526)	p-STAT1(Y701)	0.274638
p-STAT1(Y701)	p-4EBP1(S65)	0.274615
p-4EBP1(S65)	p-RAF(C-)(S259)	0.273879
p-RAF(C-)(S259)	p-4EBP1(S65)	0.273879
p-GAB1(Y627)	p-IRS1(S1101)	0.272353
p-IRS1(S1101)	p-GAB1(Y627)	0.272353
p-STAT1(Y701)	p-PLCG1(Y783)	0.27149
p-S6RIBPROT(S240/244)	p-GAB2(S159)	0.271484
p-PDGFRB(Y1009)	p-KIT(C-)(Y719)	0.271157
p-EGFR(Y845)	p-PTEN(S380)	0.270655
p-GAB2(S159)	p-CREB(S133)	0.270392
p-EGFR(Y1068)	p-PDGFRB(Y1009)	0.269957
p-PLCG2(Y759)	p-STAT3(Y705)	0.269871
p-STAT3(Y705)	p-PLCG2(Y759)	0.269871
p-STAT1(Y701)	p-PDFGRA(Y849)/PDGFRB(Y857)	0.26905
p-CDC2(Y15)	p-4EBP1(T37/46)	0.269042
p-4EBP1(T37/46)	p-CDC2(Y15)	0.269042
p-EGFR(Y1068)	p-SHC(Y239/240)	0.2687
p-GAB1(Y627)	p-CRKL(Y207)	0.268675
p-MET(Y1234/1235)	p-KIT(C-)(Y719)	0.267636
p-MEK(1/2)(S217/221)	p-PDGFRB(Y1009)	0.266668
p-FAK(Y576/577)	p-PYK2(Y402)	0.265588
p-PYK2(Y402)	p-FAK(Y576/577)	0.265588
p-EGFR(Y845)	p-CREB(S133)	0.264669
p-FOXO1(S319)/FOXO4(S262)	p-PKCPAN/G(T514)	0.264598
p-PKCPAN/G(T514)	p-FOXO1(S319)/FOXO4(S262)	0.264598
p-CDC2(Y15)	p-P38MAPK(T180/Y182)	0.262777
p-FAK(Y576/577)	p-KIT(C-)(Y719)	0.262662
p-PTEN(S380)	p-P70S6K(T421/S424)	0.26197
p-P70S6K(T421/S424)	p-PTEN(S380)	0.26197
p-EGFR(Y845)	p-GAB2(S159)	0.261789
p-CRKL(Y207)	p-P70S6K(T421/S424)	0.261615
p-P70S6K(T421/S424)	p-CRKL(Y207)	0.261615
p-SHC(Y239/240)	p-P38MAPK(T180/Y182)	0.261173
p-CRKII(Y221)	p-4EBP1(S65)	0.259943
p-FGFR1(Y653/654)	p-EGFR(Y1173)	0.258623
p-ABL(C-)(Y245)	p-CREB(S133)	0.258594
p-CREB(S133)	p-ABL(C-)(Y245)	0.258594
p-FAK(Y576/577)	p-ZAP70(Y319)/SYK(Y352)	0.258521
p-ZAP70(Y319)/SYK(Y352)	p-FAK(Y576/577)	0.258521
p-MET(Y1234/1235)	p-PDFGRA(Y849)/PDGFRB(Y857)	0.258303
p-PDFGRA(Y849)/PDGFRB(Y857)	p-MET(Y1234/1235)	0.258303
p-GAB1(Y627)	p-S6RIBPROT(S240/244)	0.25743
p-S6RIBPROT(S240/244)	p-GAB1(Y627)	0.25743
p-CRKL(Y207)	p-S6RIBPROT(S240/244)	0.256744
p-S6RIBPROT(S240/244)	p-CRKL(Y207)	0.256744
p-CDC2(Y15)	p-CDK2(T160)	0.256573
p-SRC(Y416)	p-STAT6(Y641)	0.25653
p-STAT6(Y641)	p-SRC(Y416)	0.25653
p-ERBB4(Y1284)	p-ZAP70(Y319)/SYK(Y352)	0.2563
p-ZAP70(Y319)/SYK(Y352)	p-ERBB4(Y1284)	0.2563
p-STAT5(Y694)	p-SYK(Y525/526)	0.255931
p-P38MAPK(T180/Y182)	p-PDK1(S241)	0.255545
p-PDK1(S241)	p-P38MAPK(T180/Y182)	0.255545
p-EGFR(Y845)	p-CDK2(T160)	0.255016
p-P38MAPK(T180/Y182)	p-CDK2(T160)	0.254971
p-EGFR(Y845)	p-GAB1(Y627)	0.254828
p-CREB(S133)	p-P38MAPK(T180/Y182)	0.254416
p-P38MAPK(T180/Y182)	p-CREB(S133)	0.254416
p-FGFR1(Y653/654)	p-FAK(Y576/577)	0.254127
p-PDFGRA(Y849)/PDGFRB(Y857)	p-STAT3(Y705)	0.25389
p-STAT3(Y705)	p-PDFGRA(Y849)/PDGFRB(Y857)	0.25389
p-GAB1(Y627)	p-MET(Y1349)	0.25348
p-MET(Y1349)	p-GAB1(Y627)	0.25348
p-EGFR(Y1086)	p-EGFR(Y1173)	0.253319
p-JAK1(Y1022/1023)	p-STAT3(Y705)	0.2519
p-STAT3(Y705)	p-JAK1(Y1022/1023)	0.2519
p-MET(Y1349)	p-ZAP70(Y319)/SYK(Y352)	0.251794
p-ZAP70(Y319)/SYK(Y352)	p-MET(Y1349)	0.251794
p-EGFR(Y1173)	p-PDGFRB(Y1009)	0.251734
p-PDGFRB(Y1009)	p-EGFR(Y1173)	0.251734
p-AKT(S473)	p-CREB(S133)	0.251445
p-CREB(S133)	p-AKT(S473)	0.251445
p-P70S6K(T421/S424)	p-SRC(Y527)	0.24893
p-SRC(Y527)	p-P70S6K(T421/S424)	0.24893
p-ERBB4(Y1284)	p-ERBB2(Y1221/1222)	0.247835
p-FOXO3A(S253)	p-GSK3A(S21)	0.247721
p-GSK3A(S21)	p-FOXO3A(S253)	0.247721
p-EGFR(Y1068)	p-ZAP70(Y319)/SYK(Y352)	0.247113
p-ZAP70(Y319)/SYK(Y352)	p-EGFR(Y1068)	0.247113
p-PKCPAN/G(T514)	p-SRC(Y527)	0.246413
p-SRC(Y527)	p-PKCPAN/G(T514)	0.246413
p-STAT3(Y705)	p-ERBB4(Y1284)	0.245751
p-P90RSK(S380)	p-P70S6K(T421/S424)	0.245054
p-P70S6K(T421/S424)	p-P90RSK(S380)	0.245054
p-CDC2(Y15)	p-JAK1(Y1022/1023)	0.244796
p-EGFR(Y1068)	p-STAT3(Y705)	0.24448
p-STAT3(Y705)	p-EGFR(Y1068)	0.24448
p-PDFGRA(Y849)/PDGFRB(Y857)	p-FAK(Y576/577)	0.243778
p-FAK(Y576/577)	p-PDFGRA(Y849)/PDGFRB(Y857)	0.243778
p-EGFR(Y1068)	p-PYK2(Y402)	0.242957
p-PYK2(Y402)	p-EGFR(Y1068)	0.242957
p-PDGFRB(Y1009)	p-SYK(Y525/526)	0.24242
p-SYK(Y525/526)	p-PDGFRB(Y1009)	0.24242
p-4EBP1(T37/46)	p-PDGFRA(Y754)	0.241617
p-PDGFRA(Y754)	p-4EBP1(T37/46)	0.241617
p-EGFR(Y1068)	p-STAT6(Y641)	0.23983
p-STAT6(Y641)	p-EGFR(Y1068)	0.23983
p-GAB1(Y627)	p-PLCG2(Y759)	0.239457
p-PLCG2(Y759)	p-GAB1(Y627)	0.239457
p-ERBB4(Y1284)	p-RAF(C-)(S338)	0.238691
p-RAF(C-)(S338)	p-ERBB4(Y1284)	0.238691
p-STAT3(Y705)	p-SYK(Y525/526)	0.238598
p-SYK(Y525/526)	p-STAT3(Y705)	0.238598
p-FGFR1(Y653/654)	p-SHP2(Y542)	0.236065
p-4EBP1(S65)	p-GAB2(S159)	0.235897
p-GAB2(S159)	p-4EBP1(S65)	0.235897
p-GSK3A(S21)	p-STAT3(Y705)	0.235216
p-STAT3(Y705)	p-GSK3A(S21)	0.235216
p-4EBP1(T37/46)	p-RAF(C-)(S259)	0.234602
p-RAF(C-)(S259)	p-4EBP1(T37/46)	0.234602
p-ERBB4(Y1284)	p-SYK(Y525/526)	0.23445
p-SYK(Y525/526)	p-ERBB4(Y1284)	0.23445
p-IRS1(S1101)	p-ZAP70(Y319)/SYK(Y352)	0.234374
p-MTOR(S2448)	p-PDGFRA(Y754)	0.233645
p-PDGFRA(Y754)	p-MTOR(S2448)	0.233645
p-ERBB2(Y1221/1222)	p-RAF(C-)(S338)	0.233235
p-RAF(C-)(S338)	p-ERBB2(Y1221/1222)	0.233235
p-PDGFRA(Y754)	p-P90RSK(S380)	0.233168
p-P90RSK(S380)	p-PDGFRA(Y754)	0.233168
p-PDGFRA(Y754)	p-PDK1(S241)	0.231591
p-PDK1(S241)	p-PDGFRA(Y754)	0.231591
p-PDK1(S241)	p-P70S6K(T421/S424)	0.231424
p-P70S6K(T421/S424)	p-PDK1(S241)	0.231424
p-CDC2(Y15)	p-ZAP70(Y319)/SYK(Y352)	0.230927
p-ZAP70(Y319)/SYK(Y352)	p-CDC2(Y15)	0.230927
p-PDFGRA(Y849)/PDGFRB(Y857)	p-ZAP70(Y319)/SYK(Y352)	0.230505
p-ZAP70(Y319)/SYK(Y352)	p-PDFGRA(Y849)/PDGFRB(Y857)	0.230505
p-STAT5(Y694)	p-STAT6(Y641)	0.230458
p-STAT6(Y641)	p-STAT5(Y694)	0.230458
p-PI3KP85(Y458)P55(Y199)	p-RAF(C-)(S338)	0.230302
p-RAF(C-)(S338)	p-PI3KP85(Y458)P55(Y199)	0.230302
p-IRS1(S1101)	p-STAT3(Y705)	0.230182
p-STAT3(Y705)	p-IRS1(S1101)	0.230182
p-GSK3A(S21)	p-PKCD(T505)	0.230063
p-ERBB4(Y1284)	p-RAF(C-)(S259)	0.229311
p-RAF(C-)(S259)	p-ERBB4(Y1284)	0.229311
p-PDK1(S241)	p-S6RIBPROT(S240/244)	0.22875
p-S6RIBPROT(S240/244)	p-PDK1(S241)	0.22875
p-RAF(C-)(S338)	p-ZAP70(Y319)/SYK(Y352)	0.228685
p-ZAP70(Y319)/SYK(Y352)	p-RAF(C-)(S338)	0.228685
p-PLCG2(Y759)	p-SRC(Y416)	0.228294
p-SRC(Y416)	p-PLCG2(Y759)	0.228294
p-ERK1/2(T202/Y204)	p-PYK2(Y402)	0.226364
p-PYK2(Y402)	p-ERK1/2(T202/Y204)	0.226364
p-MTOR(S2448)	p-ERK1/2(T202/Y204)	0.22626
p-ERK1/2(T202/Y204)	p-MTOR(S2448)	0.22626
p-PDGFRA(Y754)	p-MET(Y1349)	0.226101
p-P38MAPK(T180/Y182)	p-P70S6K(T421/S424)	0.22563
p-P70S6K(T421/S424)	p-P38MAPK(T180/Y182)	0.22563
p-PYK2(Y402)	p-PDGFRB(Y1009)	0.225521
p-EGFR(Y845)	p-ERBB2(Y1221/1222)	0.225246
p-ERBB2(Y1221/1222)	p-EGFR(Y845)	0.225246
p-MET(Y1234/1235)	p-STAT6(Y641)	0.225242
p-STAT6(Y641)	p-MET(Y1234/1235)	0.225242
p-GAB1(Y627)	p-P38MAPK(T180/Y182)	0.224995
p-P38MAPK(T180/Y182)	p-GAB1(Y627)	0.224995
p-AKT(S473)	p-RAF(C-)(S338)	0.224399
p-RAF(C-)(S338)	p-AKT(S473)	0.224399
p-KIT(C-)(Y719)	p-SHP2(Y542)	0.224166
p-SHP2(Y542)	p-KIT(C-)(Y719)	0.224166
p-4EBP1(T37/46)	p-GAB1(Y627)	0.224045
p-GAB1(Y627)	p-4EBP1(T37/46)	0.224045
p-SYK(Y525/526)	p-ZAP70(Y319)/SYK(Y352)	0.222644
p-ZAP70(Y319)/SYK(Y352)	p-SYK(Y525/526)	0.222644
p-GAB1(Y627)	p-ERK1/2(T202/Y204)	0.22261
p-FGFR1(Y653/654)	p-PDGFRB(Y1009)	0.221847
p-PDGFRB(Y1009)	p-FGFR1(Y653/654)	0.221847
p-PLCG2(Y759)	p-ZAP70(Y319)/SYK(Y352)	0.221628
p-ZAP70(Y319)/SYK(Y352)	p-PLCG2(Y759)	0.221628
p-JAK1(Y1022/1023)	p-SHC(Y239/240)	0.221449
p-CRKL(Y207)	p-P90RSK(S380)	0.22074
p-P90RSK(S380)	p-CRKL(Y207)	0.22074
p-CRKII(Y221)	p-ERBB4(Y1284)	0.220578
p-ERBB4(Y1284)	p-CRKII(Y221)	0.220578
p-STAT6(Y641)	p-ERBB2(Y1221/1222)	0.219911
p-STAT6(Y641)	p-ZAP70(Y319)/SYK(Y352)	0.21964
p-4EBP1(T37/46)	p-ERK1/2(T202/Y204)	0.21914
p-ERK1/2(T202/Y204)	p-4EBP1(T37/46)	0.21914
p-JAK1(Y1022/1023)	p-PYK2(Y402)	0.219036
p-PYK2(Y402)	p-JAK1(Y1022/1023)	0.219036
p-GAB2(S159)	p-SHC(Y239/240)	0.218627
p-PDGFRB(Y1009)	p-GAB1(Y627)	0.218163
p-STAT3(Y705)	p-STAT6(Y641)	0.21765
p-STAT6(Y641)	p-STAT3(Y705)	0.21765
p-PLCG1(Y783)	p-EGFR(Y1086)	0.217634
p-GAB1(Y627)	p-P70S6K(T421/S424)	0.21758
p-P70S6K(T421/S424)	p-GAB1(Y627)	0.21758
p-PKCD(T505)	p-FOXO3A(S253)	0.217123
p-AKT(S473)	p-4EBP1(T37/46)	0.216725
p-FAK(Y576/577)	p-SYK(Y525/526)	0.216416
p-SYK(Y525/526)	p-FAK(Y576/577)	0.216416
p-KIT(C-)(Y719)	p-EGFR(Y1173)	0.215142
p-EGFR(Y1086)	p-EGFR(Y845)	0.215123
p-EGFR(Y845)	p-EGFR(Y1086)	0.215123
p-SRC(Y416)	p-STAT5(Y694)	0.214877
p-STAT5(Y694)	p-SRC(Y416)	0.214877
p-FOXO1(S319)/FOXO4(S262)	p-PI3KP85(Y458)P55(Y199)	0.21467
p-PI3KP85(Y458)P55(Y199)	p-FOXO1(S319)/FOXO4(S262)	0.21467
p-PKCD(T505)	p-SHC(Y239/240)	0.214632
p-SHC(Y239/240)	p-PKCD(T505)	0.214632
p-FGFR1(Y653/654)	p-PLCG1(Y783)	0.214332
p-PLCG1(Y783)	p-FGFR1(Y653/654)	0.214332
p-EGFR(Y1086)	p-PDGFRB(Y1009)	0.214128
p-SRC(Y527)	p-FOXO3A(S253)	0.213448
p-SRC(Y416)	p-4EBP1(S65)	0.213304
p-CRKL(Y207)	p-PKCPAN/G(T514)	0.212578
p-PKCPAN/G(T514)	p-CRKL(Y207)	0.212578
p-PDFGRA(Y849)/PDGFRB(Y857)	p-SRC(Y416)	0.212519
p-SRC(Y416)	p-PDFGRA(Y849)/PDGFRB(Y857)	0.212519
p-EGFR(Y1173)	p-SHP2(Y542)	0.211907
p-SHP2(Y542)	p-EGFR(Y1173)	0.211907
p-STAT6(Y641)	p-PDGFRB(Y1009)	0.211502
p-FGFR1(Y653/654)	p-STAT1(Y701)	0.211186
p-IRS1(S1101)	p-STAT3(S727)	0.210589
p-STAT3(S727)	p-IRS1(S1101)	0.210589
p-JAK1(Y1022/1023)	p-FAK(Y576/577)	0.210552
p-FAK(Y576/577)	p-JAK1(Y1022/1023)	0.210552
p-ERBB4(Y1284)	p-PLCG2(Y759)	0.210365
p-PLCG2(Y759)	p-ERBB4(Y1284)	0.210365
p-EGFR(Y845)	p-FOXO1(S319)/FOXO4(S262)	0.210298
p-FOXO1(S319)/FOXO4(S262)	p-EGFR(Y845)	0.210298
p-CREB(S133)	p-PKCPAN/G(T514)	0.210058
p-PKCPAN/G(T514)	p-CREB(S133)	0.210058
p-MET(Y1234/1235)	p-STAT1(Y701)	0.21003
p-STAT1(Y701)	p-MET(Y1234/1235)	0.21003
p-P38MAPK(T180/Y182)	p-PTEN(S380)	0.209405
p-PTEN(S380)	p-P38MAPK(T180/Y182)	0.209405
p-P38MAPK(T180/Y182)	p-RAF(C-)(S259)	0.208991
p-RAF(C-)(S259)	p-P38MAPK(T180/Y182)	0.208991
p-EGFR(Y1086)	p-ZAP70(Y319)/SYK(Y352)	0.208513
p-ZAP70(Y319)/SYK(Y352)	p-EGFR(Y1086)	0.208513
p-JAK1(Y1022/1023)	p-GSK3A(S21)	0.207333
p-PLCG1(Y783)	p-PYK2(Y402)	0.207236
p-PYK2(Y402)	p-PLCG1(Y783)	0.207236
p-PDGFRA(Y754)	p-RAF(C-)(S338)	0.205778
p-RAF(C-)(S338)	p-PDGFRA(Y754)	0.205778
p-PKCPAN/G(T514)	p-RAF(C-)(S338)	0.205455
p-RAF(C-)(S338)	p-PKCPAN/G(T514)	0.205455
p-EGFR(Y1086)	p-PDFGRA(Y849)/PDGFRB(Y857)	0.204938
p-EGFR(Y1086)	p-KIT(C-)(Y719)	0.203488
p-KIT(C-)(Y719)	p-EGFR(Y1086)	0.203488
p-PDGFRA(Y754)	p-PKCD(T505)	0.202403
p-PKCD(T505)	p-PDGFRA(Y754)	0.202403
p-PDGFRA(Y754)	p-RAF(C-)(S259)	0.202009
p-RAF(C-)(S259)	p-PDGFRA(Y754)	0.202009
p-CRKII(Y221)	p-PKCD(T505)	0.200735
p-PKCD(T505)	p-CRKII(Y221)	0.200735
p-4EBP1(S65)	p-GSK3A(S21)	0.200307
p-MET(Y1349)	p-SRC(Y416)	0.20007
p-SRC(Y416)	p-MET(Y1349)	0.20007
p-JAK1(Y1022/1023)	p-SHP2(Y542)	0.199162
p-SHP2(Y542)	p-JAK1(Y1022/1023)	0.199162
p-PKCD(T505)	p-IGF1RB(Y1135/1136)/INSRB	0.198589
p-STAT1(Y701)	p-STAT6(Y641)	0.19854
p-STAT6(Y641)	p-STAT1(Y701)	0.19854
p-CDK2(T160)	p-RAF(C-)(S338)	0.197549
p-RAF(C-)(S338)	p-CDK2(T160)	0.197549
p-P70S6K(T421/S424)	p-GSK3A(S21)	0.197336
p-KIT(C-)(Y719)	p-EGFR(Y1068)	0.196603
p-CDC2(Y15)	p-P70S6K(T421/S424)	0.196436
p-P70S6K(T421/S424)	p-CDC2(Y15)	0.196436
p-FGFR1(Y653/654)	p-PYK2(Y402)	0.195187
p-GAB1(Y627)	p-GSK3A(S21)	0.195146
p-GSK3A(S21)	p-GAB1(Y627)	0.195146
p-PLCG1(Y783)	p-STAT3(Y705)	0.193392
p-PDK1(S241)	p-FOXO3A(S253)	0.19273
p-FGFR1(Y653/654)	p-ZAP70(Y319)/SYK(Y352)	0.192367
p-ZAP70(Y319)/SYK(Y352)	p-FGFR1(Y653/654)	0.192367
p-PKCPAN/G(T514)	p-P90RSK(S380)	0.191437
p-P90RSK(S380)	p-PKCPAN/G(T514)	0.191437
p-RAF(C-)(S259)	p-S6RIBPROT(S240/244)	0.191275
p-EGFR(Y845)	p-MET(Y1349)	0.190813
p-MET(Y1349)	p-EGFR(Y845)	0.190813
p-GAB1(Y627)	p-RAF(C-)(S259)	0.190803
p-RAF(C-)(S259)	p-GAB1(Y627)	0.190803
p-MTOR(S2448)	p-ABL(C-)(Y245)	0.190494
p-CREB(S133)	p-PTEN(S380)	0.190025
p-FAK(Y576/577)	p-SHP2(Y542)	0.189883
p-SHP2(Y542)	p-FAK(Y576/577)	0.189883
p-PI3KP85(Y458)P55(Y199)	p-FOXO3A(S253)	0.189212
p-MTOR(S2448)	p-SAPK/JNK(T183/Y185)	0.188712
p-SAPK/JNK(T183/Y185)	p-MTOR(S2448)	0.188712
p-P90RSK(S380)	p-RAF(C-)(S259)	0.187957
p-GAB1(Y627)	p-SAPK/JNK(T183/Y185)	0.187897
p-PI3KP85(Y458)P55(Y199)	p-PTEN(S380)	0.187824
p-PTEN(S380)	p-PI3KP85(Y458)P55(Y199)	0.187824
p-ERBB4(Y1284)	p-IRS1(S1101)	0.187722
p-IRS1(S1101)	p-ERBB4(Y1284)	0.187722
p-EGFR(Y845)	p-FAK(Y576/577)	0.186943
p-FAK(Y576/577)	p-EGFR(Y845)	0.186943
p-GAB2(S159)	p-MEK(1/2)(S217/221)	0.186375
p-IGF1RB(Y1135/1136)/INSRB	p-STAT3(Y705)	0.185872
p-STAT3(Y705)	p-IGF1RB(Y1135/1136)/INSRB	0.185872
p-P90RSK(S380)	p-STAT3(S727)	0.185458
p-4EBP1(T37/46)	p-PTEN(S380)	0.184083
p-PTEN(S380)	p-4EBP1(T37/46)	0.184083
p-ABL(C-)(Y245)	p-PI3KP85(Y458)P55(Y199)	0.183835
p-JAK1(Y1022/1023)	p-PLCG2(Y759)	0.183827
p-CREB(S133)	p-IRS1(S1101)	0.183572
p-FOXO3A(S253)	p-P70S6K(T421/S424)	0.18346
p-P70S6K(T421/S424)	p-FOXO3A(S253)	0.18346
p-EGFR(Y1173)	p-MET(Y1349)	0.182199
p-MET(Y1349)	p-EGFR(Y1173)	0.182199
p-FOXO3A(S253)	p-PKCPAN/G(T514)	0.181943
p-PKCPAN/G(T514)	p-FOXO3A(S253)	0.181943
p-CREB(S133)	p-PDK1(S241)	0.181684
p-MEK(1/2)(S217/221)	p-SHP2(Y542)	0.181454
p-SHP2(Y542)	p-MEK(1/2)(S217/221)	0.181454
p-SHP2(Y542)	p-STAT3(Y705)	0.181314
p-STAT3(Y705)	p-SHP2(Y542)	0.181314
p-FGFR1(Y653/654)	p-STAT5(Y694)	0.180865
p-EGFR(Y845)	p-STAT6(Y641)	0.180782
p-STAT6(Y641)	p-EGFR(Y845)	0.180782
p-P90RSK(S380)	p-SHC(Y239/240)	0.180487
p-SHC(Y239/240)	p-P90RSK(S380)	0.180487
p-CDC2(Y15)	p-P90RSK(S380)	0.180359
p-P90RSK(S380)	p-CDC2(Y15)	0.180359
p-ERBB4(Y1284)	p-STAT6(Y641)	0.179954
p-STAT6(Y641)	p-ERBB4(Y1284)	0.179954
p-MET(Y1234/1235)	p-SHP2(Y542)	0.179652
p-SHP2(Y542)	p-MET(Y1234/1235)	0.179652
p-P90RSK(S380)	p-S6RIBPROT(S240/244)	0.179346
p-MEK(1/2)(S217/221)	p-SHC(Y239/240)	0.179223
p-SHC(Y239/240)	p-MEK(1/2)(S217/221)	0.179223
p-CREB(S133)	p-4EBP1(T37/46)	0.178982
p-4EBP1(T37/46)	p-CREB(S133)	0.178982
p-IGF1RB(Y1135/1136)/INSRB	p-ZAP70(Y319)/SYK(Y352)	0.17889
p-ZAP70(Y319)/SYK(Y352)	p-IGF1RB(Y1135/1136)/INSRB	0.17889
p-CDC2(Y15)	p-PI3KP85(Y458)P55(Y199)	0.17872
p-EGFR(Y1173)	p-STAT6(Y641)	0.178461
p-STAT6(Y641)	p-EGFR(Y1173)	0.178461
p-GSK3A(S21)	p-ZAP70(Y319)/SYK(Y352)	0.177909
p-ZAP70(Y319)/SYK(Y352)	p-GSK3A(S21)	0.177909
p-GAB2(S159)	p-GAB1(Y627)	0.177724
p-IGF1RB(Y1135/1136)/INSRB	p-RAF(C-)(S259)	0.175923
p-RAF(C-)(S259)	p-IGF1RB(Y1135/1136)/INSRB	0.175923
p-PDFGRA(Y849)/PDGFRB(Y857)	p-SYK(Y525/526)	0.175787
p-SYK(Y525/526)	p-PDFGRA(Y849)/PDGFRB(Y857)	0.175787
p-EGFR(Y845)	p-PDGFRA(Y754)	0.175638
p-PDGFRA(Y754)	p-EGFR(Y845)	0.175638
p-EGFR(Y1173)	p-PDFGRA(Y849)/PDGFRB(Y857)	0.17501
p-PDFGRA(Y849)/PDGFRB(Y857)	p-EGFR(Y1173)	0.17501
p-PI3KP85(Y458)P55(Y199)	p-GAB1(Y627)	0.174292
p-P90RSK(S380)	p-PDK1(S241)	0.174282
p-KIT(C-)(Y719)	p-STAT1(Y701)	0.173354
p-PDK1(S241)	p-STAT3(S727)	0.172015
p-STAT3(S727)	p-PDK1(S241)	0.172015
p-EGFR(Y1086)	p-STAT3(Y705)	0.171838
p-STAT3(Y705)	p-EGFR(Y1086)	0.171838
p-PKCD(T505)	p-PDGFRB(Y1009)	0.170634
p-SHP2(Y542)	p-GAB1(Y627)	0.16993
p-ERK1/2(T202/Y204)	p-PKCD(T505)	0.169015
p-PKCD(T505)	p-ERK1/2(T202/Y204)	0.169015
p-CREB(S133)	p-RAF(C-)(S259)	0.16818
p-KIT(C-)(Y719)	p-STAT6(Y641)	0.167776
p-STAT6(Y641)	p-KIT(C-)(Y719)	0.167776
p-PLCG2(Y759)	p-ERBB2(Y1221/1222)	0.167046
p-MET(Y1349)	p-SYK(Y525/526)	0.166875
p-SYK(Y525/526)	p-MET(Y1349)	0.166875
p-MET(Y1234/1235)	p-FAK(Y576/577)	0.166539
p-FAK(Y576/577)	p-MET(Y1234/1235)	0.166539
p-PYK2(Y402)	p-STAT5(Y694)	0.165957
p-STAT5(Y694)	p-PYK2(Y402)	0.165957
p-GAB2(S159)	p-4EBP1(T37/46)	0.165006
p-ERK1/2(T202/Y204)	p-STAT1(Y701)	0.164271
p-EGFR(Y845)	p-MTOR(S2448)	0.163178
p-MTOR(S2448)	p-EGFR(Y845)	0.163178
p-EGFR(Y845)	p-PDGFRB(Y1009)	0.16259
p-PDGFRB(Y1009)	p-EGFR(Y845)	0.16259
p-MEK(1/2)(S217/221)	p-PLCG2(Y759)	0.162147
p-PLCG2(Y759)	p-MEK(1/2)(S217/221)	0.162147
p-MTOR(S2448)	p-PDK1(S241)	0.161846
p-PDK1(S241)	p-MTOR(S2448)	0.161846
p-ERK1/2(T202/Y204)	p-SRC(Y416)	0.161667
p-SRC(Y416)	p-ERK1/2(T202/Y204)	0.161667
p-EGFR(Y1068)	p-GAB1(Y627)	0.161474
p-GAB1(Y627)	p-EGFR(Y1068)	0.161474
p-ABL(C-)(Y245)	p-CRKL(Y207)	0.161469
p-CRKL(Y207)	p-ABL(C-)(Y245)	0.161469
p-P38MAPK(T180/Y182)	p-PKCPAN/G(T514)	0.161389
p-PKCPAN/G(T514)	p-P38MAPK(T180/Y182)	0.161389
p-PKCD(T505)	p-PDFGRA(Y849)/PDGFRB(Y857)	0.161324
p-STAT5(Y694)	p-STAT3(Y705)	0.161141
p-STAT1(Y701)	p-EGFR(Y1068)	0.160471
p-ERBB2(Y1221/1222)	p-ZAP70(Y319)/SYK(Y352)	0.15987
p-ZAP70(Y319)/SYK(Y352)	p-ERBB2(Y1221/1222)	0.15987
p-CREB(S133)	p-FOXO1(S319)/FOXO4(S262)	0.158871
p-FOXO1(S319)/FOXO4(S262)	p-CREB(S133)	0.158871
p-PKCD(T505)	p-MEK(1/2)(S217/221)	0.158791
p-MET(Y1234/1235)	p-ERBB2(Y1221/1222)	0.158737
p-P90RSK(S380)	p-IRS1(S1101)	0.158714
p-CDC2(Y15)	p-S6RIBPROT(S240/244)	0.157908
p-S6RIBPROT(S240/244)	p-CDC2(Y15)	0.157908
p-EGFR(Y1086)	p-ERBB2(Y1221/1222)	0.156873
p-FAK(Y576/577)	p-EGFR(Y1068)	0.156697
p-ERBB2(Y1221/1222)	p-SHP2(Y542)	0.155477
p-SHP2(Y542)	p-ERBB2(Y1221/1222)	0.155477
p-MET(Y1349)	p-PLCG2(Y759)	0.155447
p-PLCG2(Y759)	p-MET(Y1349)	0.155447
p-IRS1(S1101)	p-P70S6K(T421/S424)	0.155161
p-P70S6K(T421/S424)	p-IRS1(S1101)	0.155161
p-PI3KP85(Y458)P55(Y199)	p-PKCD(T505)	0.15509
p-PKCD(T505)	p-PI3KP85(Y458)P55(Y199)	0.15509
p-EGFR(Y1068)	p-SHP2(Y542)	0.154933
p-SHP2(Y542)	p-EGFR(Y1068)	0.154933
p-FOXO1(S319)/FOXO4(S262)	p-RAF(C-)(S259)	0.154448
p-RAF(C-)(S259)	p-FOXO1(S319)/FOXO4(S262)	0.154448
p-MTOR(S2448)	p-GSK3A(S21)	0.154392
p-GSK3A(S21)	p-MTOR(S2448)	0.154392
p-EGFR(Y1086)	p-ERBB4(Y1284)	0.154299
p-ERBB4(Y1284)	p-EGFR(Y1086)	0.154299
p-FOXO1(S319)/FOXO4(S262)	p-P70S6K(T421/S424)	0.154292
p-CDC2(Y15)	p-CRKII(Y221)	0.154071
p-CRKII(Y221)	p-CDC2(Y15)	0.154071
p-JAK1(Y1022/1023)	p-STAT6(Y641)	0.15385
p-STAT6(Y641)	p-JAK1(Y1022/1023)	0.15385
p-MET(Y1234/1235)	p-ZAP70(Y319)/SYK(Y352)	0.153649
p-ZAP70(Y319)/SYK(Y352)	p-MET(Y1234/1235)	0.153649
p-RAF(C-)(S259)	p-STAT3(Y705)	0.153101
p-STAT3(Y705)	p-RAF(C-)(S259)	0.153101
p-PTEN(S380)	p-S6RIBPROT(S240/244)	0.152855
p-S6RIBPROT(S240/244)	p-PTEN(S380)	0.152855
p-EGFR(Y1173)	p-ERK1/2(T202/Y204)	0.152305
p-ERK1/2(T202/Y204)	p-EGFR(Y1173)	0.152305
p-EGFR(Y1173)	p-STAT1(Y701)	0.152293
p-STAT1(Y701)	p-EGFR(Y1173)	0.152293
p-EGFR(Y1173)	p-STAT3(Y705)	0.151972
p-STAT3(Y705)	p-EGFR(Y1173)	0.151972
p-AKT(S473)	p-P38MAPK(T180/Y182)	0.151689
p-P38MAPK(T180/Y182)	p-AKT(S473)	0.151689
p-STAT5(Y694)	p-PDFGRA(Y849)/PDGFRB(Y857)	0.151344
p-4EBP1(T37/46)	p-P38MAPK(T180/Y182)	0.151314
p-P38MAPK(T180/Y182)	p-4EBP1(T37/46)	0.151314
p-CRKII(Y221)	p-RAF(C-)(S259)	0.150613
p-RAF(C-)(S259)	p-CRKII(Y221)	0.150613
p-P90RSK(S380)	p-IGF1RB(Y1135/1136)/INSRB	0.150177
p-IRS1(S1101)	p-SHC(Y239/240)	0.149661
p-SHC(Y239/240)	p-IRS1(S1101)	0.149661
p-PYK2(Y402)	p-ZAP70(Y319)/SYK(Y352)	0.149386
p-ZAP70(Y319)/SYK(Y352)	p-PYK2(Y402)	0.149386
p-CREB(S133)	p-STAT3(S727)	0.148523
p-PLCG1(Y783)	p-SRC(Y416)	0.148331
p-SRC(Y416)	p-PLCG1(Y783)	0.148331
p-SRC(Y416)	p-FAK(Y576/577)	0.146883
p-CRKII(Y221)	p-FGFR1(Y653/654)	0.146768
p-FGFR1(Y653/654)	p-CRKII(Y221)	0.146768
p-P90RSK(S380)	p-P38MAPK(T180/Y182)	0.146678
p-PDGFRB(Y1009)	p-FAK(Y576/577)	0.14666
p-ERK1/2(T202/Y204)	p-SHP2(Y542)	0.146539
p-SHP2(Y542)	p-ERK1/2(T202/Y204)	0.146539
p-SHC(Y239/240)	p-ERK1/2(T202/Y204)	0.146132
p-FOXO1(S319)/FOXO4(S262)	p-FOXO3A(S253)	0.145812
p-FOXO3A(S253)	p-FOXO1(S319)/FOXO4(S262)	0.145812
p-CREB(S133)	p-CDC2(Y15)	0.14562
p-SRC(Y416)	p-STAT3(Y705)	0.144364
p-MET(Y1234/1235)	p-STAT5(Y694)	0.14411
p-STAT5(Y694)	p-MET(Y1234/1235)	0.14411
p-CREB(S133)	p-GAB1(Y627)	0.143385
p-GAB1(Y627)	p-CREB(S133)	0.143385
p-MTOR(S2448)	p-4EBP1(T37/46)	0.142881
p-CRKII(Y221)	p-MET(Y1349)	0.142692
p-MET(Y1349)	p-CRKII(Y221)	0.142692
p-MET(Y1234/1235)	p-MET(Y1349)	0.142079
p-MET(Y1349)	p-MET(Y1234/1235)	0.142079
p-P38MAPK(T180/Y182)	p-PDGFRA(Y754)	0.14184
p-PDGFRA(Y754)	p-P38MAPK(T180/Y182)	0.14184
p-PLCG1(Y783)	p-P38MAPK(T180/Y182)	0.140907
p-CRKII(Y221)	p-FAK(Y576/577)	0.140234
p-4EBP1(T37/46)	p-PYK2(Y402)	0.139659
p-PYK2(Y402)	p-4EBP1(T37/46)	0.139659
p-ABL(C-)(Y245)	p-IRS1(S1101)	0.138763
p-ABL(C-)(Y245)	p-PYK2(Y402)	0.138591
p-PYK2(Y402)	p-ABL(C-)(Y245)	0.138591
p-ERK1/2(T202/Y204)	p-PLCG2(Y759)	0.137351
p-PLCG2(Y759)	p-ERK1/2(T202/Y204)	0.137351
p-ABL(C-)(Y245)	p-P38MAPK(T180/Y182)	0.136146
p-P38MAPK(T180/Y182)	p-ABL(C-)(Y245)	0.136146
p-PI3KP85(Y458)P55(Y199)	p-STAT3(S727)	0.13585
p-STAT3(S727)	p-PI3KP85(Y458)P55(Y199)	0.13585
p-P90RSK(S380)	p-MET(Y1349)	0.13541
p-IRS1(S1101)	p-MEK(1/2)(S217/221)	0.135288
p-MEK(1/2)(S217/221)	p-IRS1(S1101)	0.135288
p-MTOR(S2448)	p-STAT3(Y705)	0.135165
p-STAT3(Y705)	p-MTOR(S2448)	0.135165
p-SHP2(Y542)	p-SHC(Y239/240)	0.134696
p-P90RSK(S380)	p-CRKII(Y221)	0.134632
p-CRKII(Y221)	p-S6RIBPROT(S240/244)	0.134215
p-CREB(S133)	p-FOXO3A(S253)	0.133514
p-FOXO3A(S253)	p-CREB(S133)	0.133514
p-PDGFRA(Y754)	p-GAB1(Y627)	0.133352
p-MEK(1/2)(S217/221)	p-PYK2(Y402)	0.13331
p-PYK2(Y402)	p-MEK(1/2)(S217/221)	0.13331
p-IRS1(S1101)	p-PTEN(S380)	0.132832
p-PTEN(S380)	p-IRS1(S1101)	0.132832
p-PDGFRA(Y754)	p-PI3KP85(Y458)P55(Y199)	0.132807
p-PI3KP85(Y458)P55(Y199)	p-PDGFRA(Y754)	0.132807
p-ERBB2(Y1221/1222)	p-PYK2(Y402)	0.132531
p-PYK2(Y402)	p-ERBB2(Y1221/1222)	0.132531
p-IRS1(S1101)	p-S6RIBPROT(S240/244)	0.13192
p-S6RIBPROT(S240/244)	p-IRS1(S1101)	0.13192
p-GSK3A(S21)	p-PI3KP85(Y458)P55(Y199)	0.131244
p-PI3KP85(Y458)P55(Y199)	p-GSK3A(S21)	0.131244
p-AKT(S473)	p-GAB2(S159)	0.131079
p-MEK(1/2)(S217/221)	p-PLCG1(Y783)	0.130809
p-PLCG1(Y783)	p-MEK(1/2)(S217/221)	0.130809
p-SRC(Y527)	p-RAF(C-)(S259)	0.130757
p-ERBB4(Y1284)	p-SHP2(Y542)	0.130738
p-SHP2(Y542)	p-ERBB4(Y1284)	0.130738
p-MTOR(S2448)	p-SHP2(Y542)	0.130199
p-SHP2(Y542)	p-MTOR(S2448)	0.130199
p-IRS1(S1101)	p-P38MAPK(T180/Y182)	0.130094
p-P38MAPK(T180/Y182)	p-IRS1(S1101)	0.130094
p-GAB1(Y627)	p-STAT1(Y701)	0.128925
p-STAT1(Y701)	p-GAB1(Y627)	0.128925
p-ERK1/2(T202/Y204)	p-SAPK/JNK(T183/Y185)	0.128004
p-SAPK/JNK(T183/Y185)	p-ERK1/2(T202/Y204)	0.128004
p-PDK1(S241)	p-PI3KP85(Y458)P55(Y199)	0.127958
p-PI3KP85(Y458)P55(Y199)	p-PDK1(S241)	0.127958
p-PLCG2(Y759)	p-SHC(Y239/240)	0.127939
p-SHC(Y239/240)	p-PLCG2(Y759)	0.127939
p-EGFR(Y1173)	p-STAT5(Y694)	0.127778
p-STAT5(Y694)	p-EGFR(Y1173)	0.127778
p-MET(Y1349)	p-RAF(C-)(S338)	0.127343
p-RAF(C-)(S338)	p-MET(Y1349)	0.127343
p-KIT(C-)(Y719)	p-4EBP1(T37/46)	0.127104
p-FOXO3A(S253)	p-S6RIBPROT(S240/244)	0.126793
p-S6RIBPROT(S240/244)	p-FOXO3A(S253)	0.126793
p-FOXO3A(S253)	p-PDGFRA(Y754)	0.126762
p-PDGFRA(Y754)	p-FOXO3A(S253)	0.126762
p-GAB2(S159)	p-P90RSK(S380)	0.126642
p-4EBP1(T37/46)	p-GSK3A(S21)	0.126528
p-GSK3A(S21)	p-4EBP1(T37/46)	0.126528
p-CRKII(Y221)	p-STAT3(Y705)	0.126395
p-STAT3(Y705)	p-CRKII(Y221)	0.126395
p-EGFR(Y1086)	p-MET(Y1349)	0.126282
p-SAPK/JNK(T183/Y185)	p-SYK(Y525/526)	0.125876
p-SYK(Y525/526)	p-SAPK/JNK(T183/Y185)	0.125876
p-EGFR(Y845)	p-MEK(1/2)(S217/221)	0.124791
p-MEK(1/2)(S217/221)	p-EGFR(Y845)	0.124791
p-CRKL(Y207)	p-MEK(1/2)(S217/221)	0.124295
p-MEK(1/2)(S217/221)	p-CRKL(Y207)	0.124295
p-PLCG2(Y759)	p-PKCD(T505)	0.12409
p-PKCD(T505)	p-PLCG2(Y759)	0.12409
p-S6RIBPROT(S240/244)	p-SRC(Y527)	0.123747
p-SRC(Y527)	p-S6RIBPROT(S240/244)	0.123747
p-EGFR(Y1086)	p-GAB1(Y627)	0.123629
p-PTEN(S380)	p-FOXO3A(S253)	0.123505
p-SAPK/JNK(T183/Y185)	p-PDGFRA(Y754)	0.12309
p-PDGFRA(Y754)	p-SAPK/JNK(T183/Y185)	0.12309
p-ERBB2(Y1221/1222)	p-JAK1(Y1022/1023)	0.122603
p-JAK1(Y1022/1023)	p-ERBB2(Y1221/1222)	0.122603
p-ERBB4(Y1284)	p-SRC(Y416)	0.122071
p-SRC(Y416)	p-ERBB4(Y1284)	0.122071
p-SHC(Y239/240)	p-MET(Y1349)	0.12121
p-CRKII(Y221)	p-AKT(S473)	0.120711
p-EGFR(Y1173)	p-ZAP70(Y319)/SYK(Y352)	0.120345
p-ZAP70(Y319)/SYK(Y352)	p-EGFR(Y1173)	0.120345
p-ERK1/2(T202/Y204)	p-SYK(Y525/526)	0.12001
p-SYK(Y525/526)	p-ERK1/2(T202/Y204)	0.12001
p-PLCG1(Y783)	p-STAT6(Y641)	0.119257
p-STAT6(Y641)	p-PLCG1(Y783)	0.119257
p-SHC(Y239/240)	p-PI3KP85(Y458)P55(Y199)	0.118483
p-EGFR(Y1068)	p-JAK1(Y1022/1023)	0.118221
p-JAK1(Y1022/1023)	p-EGFR(Y1068)	0.118221
p-STAT5(Y694)	p-ZAP70(Y319)/SYK(Y352)	0.116997
p-ZAP70(Y319)/SYK(Y352)	p-STAT5(Y694)	0.116997
p-4EBP1(S65)	p-P70S6K(T421/S424)	0.115019
p-P70S6K(T421/S424)	p-4EBP1(S65)	0.115019
p-GSK3A(S21)	p-STAT3(S727)	0.114764
p-STAT3(S727)	p-GSK3A(S21)	0.114764
p-ABL(C-)(Y245)	p-CDC2(Y15)	0.114623
p-CDK2(T160)	p-GAB2(S159)	0.114308
p-GAB2(S159)	p-CDK2(T160)	0.114308
p-IGF1RB(Y1135/1136)/INSRB	p-RAF(C-)(S338)	0.113983
p-RAF(C-)(S338)	p-IGF1RB(Y1135/1136)/INSRB	0.113983
p-ABL(C-)(Y245)	p-SHP2(Y542)	0.113161
p-P70S6K(T421/S424)	p-STAT3(S727)	0.113142
p-STAT3(S727)	p-P70S6K(T421/S424)	0.113142
p-AKT(S473)	p-FOXO3A(S253)	0.11313
p-FOXO3A(S253)	p-AKT(S473)	0.11313
p-EGFR(Y1068)	p-ERBB4(Y1284)	0.11304
p-ERBB4(Y1284)	p-EGFR(Y1068)	0.11304
p-ERBB4(Y1284)	p-FGFR1(Y653/654)	0.112921
p-FGFR1(Y653/654)	p-ERBB4(Y1284)	0.112921
p-FOXO1(S319)/FOXO4(S262)	p-MEK(1/2)(S217/221)	0.112784
p-MTOR(S2448)	p-PKCD(T505)	0.111573
p-PKCD(T505)	p-MTOR(S2448)	0.111573
p-STAT1(Y701)	p-ZAP70(Y319)/SYK(Y352)	0.111427
p-ZAP70(Y319)/SYK(Y352)	p-STAT1(Y701)	0.111427
p-ABL(C-)(Y245)	p-STAT5(Y694)	0.110831
p-SHP2(Y542)	p-ZAP70(Y319)/SYK(Y352)	0.110644
p-ZAP70(Y319)/SYK(Y352)	p-SHP2(Y542)	0.110644
p-MTOR(S2448)	p-SRC(Y416)	0.110635
p-SRC(Y416)	p-MTOR(S2448)	0.110635
p-EGFR(Y1173)	p-FAK(Y576/577)	0.11024
p-FAK(Y576/577)	p-EGFR(Y1173)	0.11024
p-GSK3A(S21)	p-MET(Y1349)	0.109565
p-MET(Y1349)	p-GSK3A(S21)	0.109565
p-CDC2(Y15)	p-ERBB4(Y1284)	0.109063
p-ERBB4(Y1284)	p-CDC2(Y15)	0.109063
p-PLCG1(Y783)	p-FOXO1(S319)/FOXO4(S262)	0.108987
p-PKCD(T505)	p-GAB1(Y627)	0.108724
p-FAK(Y576/577)	p-RAF(C-)(S338)	0.10859
p-RAF(C-)(S338)	p-FAK(Y576/577)	0.10859
p-PLCG1(Y783)	p-ZAP70(Y319)/SYK(Y352)	0.108546
p-ZAP70(Y319)/SYK(Y352)	p-PLCG1(Y783)	0.108546
p-PDK1(S241)	p-ZAP70(Y319)/SYK(Y352)	0.107789
p-ZAP70(Y319)/SYK(Y352)	p-PDK1(S241)	0.107789
p-EGFR(Y1173)	p-ERBB2(Y1221/1222)	0.107737
p-ERBB2(Y1221/1222)	p-EGFR(Y1173)	0.107737
p-JAK1(Y1022/1023)	p-MET(Y1234/1235)	0.107665
p-MET(Y1234/1235)	p-JAK1(Y1022/1023)	0.107665
p-KIT(C-)(Y719)	p-PDGFRB(Y1009)	0.107518
p-CRKII(Y221)	p-IGF1RB(Y1135/1136)/INSRB	0.107302
p-IGF1RB(Y1135/1136)/INSRB	p-CRKII(Y221)	0.107302
p-MTOR(S2448)	p-GAB1(Y627)	0.106801
p-GAB1(Y627)	p-MTOR(S2448)	0.106801
p-SAPK/JNK(T183/Y185)	p-P90RSK(S380)	0.106389
p-PDGFRB(Y1009)	p-STAT3(Y705)	0.105805
p-STAT3(Y705)	p-PDGFRB(Y1009)	0.105805
p-ERBB2(Y1221/1222)	p-PDFGRA(Y849)/PDGFRB(Y857)	0.105388
p-PDFGRA(Y849)/PDGFRB(Y857)	p-ERBB2(Y1221/1222)	0.105388
p-4EBP1(T37/46)	p-S6RIBPROT(S240/244)	0.10535
p-S6RIBPROT(S240/244)	p-4EBP1(T37/46)	0.10535
p-ABL(C-)(Y245)	p-CDK2(T160)	0.105272
p-CDK2(T160)	p-ABL(C-)(Y245)	0.105272
p-PKCD(T505)	p-PYK2(Y402)	0.104968
p-PYK2(Y402)	p-PKCD(T505)	0.104968
p-EGFR(Y845)	p-IRS1(S1101)	0.104884
p-IRS1(S1101)	p-EGFR(Y845)	0.104884
p-EGFR(Y845)	p-STAT1(Y701)	0.104733
p-STAT1(Y701)	p-EGFR(Y845)	0.104733
p-JAK1(Y1022/1023)	p-FGFR1(Y653/654)	0.104488
p-PYK2(Y402)	p-SHC(Y239/240)	0.104213
p-SHC(Y239/240)	p-PYK2(Y402)	0.104213
p-ABL(C-)(Y245)	p-PKCD(T505)	0.103774
p-PKCD(T505)	p-ABL(C-)(Y245)	0.103774
p-SRC(Y527)	p-GAB1(Y627)	0.103612
p-KIT(C-)(Y719)	p-PDFGRA(Y849)/PDGFRB(Y857)	0.102258
p-PDGFRB(Y1009)	p-STAT1(Y701)	0.101961
p-STAT1(Y701)	p-PDGFRB(Y1009)	0.101961
p-GAB2(S159)	p-S6RIBPROT(S240/244)	0.101653
p-PLCG1(Y783)	p-MTOR(S2448)	0.101507
p-EGFR(Y1086)	p-JAK1(Y1022/1023)	0.100869
p-PLCG1(Y783)	p-P70S6K(T421/S424)	0.100574
p-PKCD(T505)	p-FAK(Y576/577)	0.100426
p-FAK(Y576/577)	p-PKCD(T505)	0.100426
p-KIT(C-)(Y719)	p-PLCG1(Y783)	0.0990151
p-PLCG1(Y783)	p-KIT(C-)(Y719)	0.0990151
p-AKT(S473)	p-PKCD(T505)	0.0989735
p-PKCD(T505)	p-AKT(S473)	0.0989735
p-PDK1(S241)	p-STAT3(Y705)	0.0982779
p-STAT3(Y705)	p-PDK1(S241)	0.0982779
p-CREB(S133)	p-EGFR(Y845)	0.0982669
p-STAT1(Y701)	p-STAT3(Y705)	0.098266
p-STAT3(Y705)	p-STAT1(Y701)	0.098266
p-MTOR(S2448)	p-PTEN(S380)	0.0980959
p-PTEN(S380)	p-MTOR(S2448)	0.0980959
p-EGFR(Y1173)	p-FOXO1(S319)/FOXO4(S262)	0.0978125
p-FOXO1(S319)/FOXO4(S262)	p-EGFR(Y1173)	0.0978125
p-JAK1(Y1022/1023)	p-ERK1/2(T202/Y204)	0.0974923
p-ERK1/2(T202/Y204)	p-JAK1(Y1022/1023)	0.0974923
p-PTEN(S380)	p-P90RSK(S380)	0.097262
p-P90RSK(S380)	p-PTEN(S380)	0.097262
p-P38MAPK(T180/Y182)	p-PKCD(T505)	0.0966269
p-PKCD(T505)	p-P38MAPK(T180/Y182)	0.0966269
p-ERK1/2(T202/Y204)	p-MET(Y1234/1235)	0.0960608
p-MET(Y1234/1235)	p-ERK1/2(T202/Y204)	0.0960608
p-STAT6(Y641)	p-ERK1/2(T202/Y204)	0.0960451
p-JAK1(Y1022/1023)	p-PLCG1(Y783)	0.0958677
p-PLCG1(Y783)	p-JAK1(Y1022/1023)	0.0958677
p-P70S6K(T421/S424)	p-ABL(C-)(Y245)	0.0958069
p-ERK1/2(T202/Y204)	p-STAT3(S727)	0.0954172
p-STAT3(S727)	p-ERK1/2(T202/Y204)	0.0954172
p-AKT(S473)	p-PDK1(S241)	0.0948667
p-ERBB4(Y1284)	p-MET(Y1349)	0.09434
p-MET(Y1349)	p-ERBB4(Y1284)	0.09434
p-MEK(1/2)(S217/221)	p-PDFGRA(Y849)/PDGFRB(Y857)	0.0942582
p-PDFGRA(Y849)/PDGFRB(Y857)	p-MEK(1/2)(S217/221)	0.0942582
p-GAB2(S159)	p-MTOR(S2448)	0.0941512
p-ERK1/2(T202/Y204)	p-PDFGRA(Y849)/PDGFRB(Y857)	0.0936737
p-PDFGRA(Y849)/PDGFRB(Y857)	p-ERK1/2(T202/Y204)	0.0936737
p-GAB2(S159)	p-CDC2(Y15)	0.093424
p-SHC(Y239/240)	p-ZAP70(Y319)/SYK(Y352)	0.0932727
p-ZAP70(Y319)/SYK(Y352)	p-SHC(Y239/240)	0.0932727
p-STAT5(Y694)	p-EGFR(Y845)	0.0932444
p-FAK(Y576/577)	p-STAT1(Y701)	0.0931496
p-STAT1(Y701)	p-FAK(Y576/577)	0.0931496
p-KIT(C-)(Y719)	p-STAT3(Y705)	0.0929061
p-ERK1/2(T202/Y204)	p-RAF(C-)(S259)	0.0927595
p-RAF(C-)(S259)	p-ERK1/2(T202/Y204)	0.0927595
p-EGFR(Y1173)	p-ERBB4(Y1284)	0.0923124
p-ERBB4(Y1284)	p-EGFR(Y1173)	0.0923124
p-ABL(C-)(Y245)	p-EGFR(Y1173)	0.0922538
p-ERBB4(Y1284)	p-MET(Y1234/1235)	0.091779
p-MET(Y1234/1235)	p-ERBB4(Y1284)	0.091779
p-PI3KP85(Y458)P55(Y199)	p-RAF(C-)(S259)	0.0915523
p-RAF(C-)(S259)	p-PI3KP85(Y458)P55(Y199)	0.0915523
p-FOXO1(S319)/FOXO4(S262)	p-CDC2(Y15)	0.0914483
p-JAK1(Y1022/1023)	p-P90RSK(S380)	0.0913084
p-P90RSK(S380)	p-JAK1(Y1022/1023)	0.0913084
p-JAK1(Y1022/1023)	p-STAT5(Y694)	0.0912611
p-STAT5(Y694)	p-JAK1(Y1022/1023)	0.0912611
p-FAK(Y576/577)	p-STAT5(Y694)	0.090809
p-STAT5(Y694)	p-FAK(Y576/577)	0.090809
p-GAB1(Y627)	p-STAT6(Y641)	0.0905797
p-STAT6(Y641)	p-GAB1(Y627)	0.0905797
p-CREB(S133)	p-MTOR(S2448)	0.0903681
p-MTOR(S2448)	p-CREB(S133)	0.0903681
p-4EBP1(T37/46)	p-P70S6K(T421/S424)	0.0898428
p-P70S6K(T421/S424)	p-4EBP1(T37/46)	0.0898428
p-ABL(C-)(Y245)	p-CRKII(Y221)	0.0897648
p-CRKII(Y221)	p-ABL(C-)(Y245)	0.0897648
p-ERBB2(Y1221/1222)	p-STAT1(Y701)	0.0892319
p-STAT1(Y701)	p-ERBB2(Y1221/1222)	0.0892319
p-PI3KP85(Y458)P55(Y199)	p-SHP2(Y542)	0.0890368
p-SHP2(Y542)	p-PI3KP85(Y458)P55(Y199)	0.0890368
p-4EBP1(S65)	p-GAB1(Y627)	0.088834
p-GAB1(Y627)	p-4EBP1(S65)	0.088834
p-AKT(S473)	p-IRS1(S1101)	0.0887142
p-IRS1(S1101)	p-AKT(S473)	0.0887142
p-SAPK/JNK(T183/Y185)	p-PLCG1(Y783)	0.0885026
p-GAB2(S159)	p-PKCD(T505)	0.0883803
p-PKCD(T505)	p-GAB2(S159)	0.0883803
p-FOXO1(S319)/FOXO4(S262)	p-ERK1/2(T202/Y204)	0.0880649
p-ERK1/2(T202/Y204)	p-FOXO1(S319)/FOXO4(S262)	0.0880649
p-FOXO1(S319)/FOXO4(S262)	p-GAB1(Y627)	0.0879202
p-IGF1RB(Y1135/1136)/INSRB	p-MET(Y1349)	0.0878229
p-MET(Y1349)	p-IGF1RB(Y1135/1136)/INSRB	0.0878229
p-FOXO1(S319)/FOXO4(S262)	p-CRKL(Y207)	0.0877868
p-CREB(S133)	p-RAF(C-)(S338)	0.0875948
p-RAF(C-)(S338)	p-CREB(S133)	0.0875948
p-MTOR(S2448)	p-PYK2(Y402)	0.0874593
p-PYK2(Y402)	p-MTOR(S2448)	0.0874593
p-JAK1(Y1022/1023)	p-PDK1(S241)	0.0867128
p-PDK1(S241)	p-JAK1(Y1022/1023)	0.0867128
p-ABL(C-)(Y245)	p-GSK3A(S21)	0.0866746
p-GSK3A(S21)	p-ABL(C-)(Y245)	0.0866746
p-EGFR(Y845)	p-GSK3A(S21)	0.0866647
p-GSK3A(S21)	p-EGFR(Y845)	0.0866647
p-PDGFRB(Y1009)	p-ZAP70(Y319)/SYK(Y352)	0.0864787
p-ZAP70(Y319)/SYK(Y352)	p-PDGFRB(Y1009)	0.0864787
p-FGFR1(Y653/654)	p-GAB1(Y627)	0.0858703
p-GAB1(Y627)	p-FGFR1(Y653/654)	0.0858703
p-4EBP1(S65)	p-ZAP70(Y319)/SYK(Y352)	0.0853769
p-CRKL(Y207)	p-MTOR(S2448)	0.085098
p-MTOR(S2448)	p-CRKL(Y207)	0.085098
p-CDC2(Y15)	p-STAT1(Y701)	0.0848333
p-STAT1(Y701)	p-CDC2(Y15)	0.0848333
p-STAT5(Y694)	p-CDC2(Y15)	0.0847531
p-MEK(1/2)(S217/221)	p-PI3KP85(Y458)P55(Y199)	0.0846198
p-CRKII(Y221)	p-PDFGRA(Y849)/PDGFRB(Y857)	0.0840306
p-ERBB4(Y1284)	p-PKCD(T505)	0.0840102
p-PKCD(T505)	p-ERBB4(Y1284)	0.0840102
p-EGFR(Y845)	p-ZAP70(Y319)/SYK(Y352)	0.0839939
p-ZAP70(Y319)/SYK(Y352)	p-EGFR(Y845)	0.0839939
p-P70S6K(T421/S424)	p-STAT3(Y705)	0.0839012
p-STAT3(Y705)	p-P70S6K(T421/S424)	0.0839012
p-PKCD(T505)	p-STAT6(Y641)	0.0837245
p-STAT6(Y641)	p-PKCD(T505)	0.0837245
p-CRKL(Y207)	p-RAF(C-)(S338)	0.0828755
p-RAF(C-)(S338)	p-CRKL(Y207)	0.0828755
p-EGFR(Y845)	p-PDFGRA(Y849)/PDGFRB(Y857)	0.0828374
p-PDFGRA(Y849)/PDGFRB(Y857)	p-EGFR(Y845)	0.0828374
p-GAB1(Y627)	p-PDFGRA(Y849)/PDGFRB(Y857)	0.0827667
p-PDFGRA(Y849)/PDGFRB(Y857)	p-GAB1(Y627)	0.0827667
p-AKT(S473)	p-CDC2(Y15)	0.0825563
p-CDC2(Y15)	p-AKT(S473)	0.0825563
p-PTEN(S380)	p-FOXO1(S319)/FOXO4(S262)	0.0820951
p-CDC2(Y15)	p-GAB1(Y627)	0.0820715
p-GAB1(Y627)	p-CDC2(Y15)	0.0820715
p-FGFR1(Y653/654)	p-MET(Y1349)	0.081884
p-MET(Y1349)	p-FGFR1(Y653/654)	0.081884
p-FOXO1(S319)/FOXO4(S262)	p-MTOR(S2448)	0.0816421
p-CRKL(Y207)	p-RAF(C-)(S259)	0.0816204
p-RAF(C-)(S259)	p-CRKL(Y207)	0.0816204
p-MTOR(S2448)	p-PI3KP85(Y458)P55(Y199)	0.0813178
p-PI3KP85(Y458)P55(Y199)	p-MTOR(S2448)	0.0813178
p-EGFR(Y845)	p-SHP2(Y542)	0.0811607
p-SHP2(Y542)	p-EGFR(Y845)	0.0811607
p-GAB2(S159)	p-EGFR(Y845)	0.0810397
p-CDC2(Y15)	p-SHP2(Y542)	0.0808538
p-SHP2(Y542)	p-CDC2(Y15)	0.0808538
p-MET(Y1349)	p-PYK2(Y402)	0.0804837
p-PYK2(Y402)	p-MET(Y1349)	0.0804837
p-PKCD(T505)	p-S6RIBPROT(S240/244)	0.0800777
p-S6RIBPROT(S240/244)	p-PKCD(T505)	0.0800777
p-CRKL(Y207)	p-GAB1(Y627)	0.0798655
p-MEK(1/2)(S217/221)	p-STAT3(S727)	0.0794167
p-STAT3(S727)	p-MEK(1/2)(S217/221)	0.0794167
p-CRKII(Y221)	p-SHP2(Y542)	0.079416
p-SHP2(Y542)	p-CRKII(Y221)	0.079416
p-GAB2(S159)	p-STAT3(Y705)	0.0785696
p-STAT3(Y705)	p-GAB2(S159)	0.0785696
p-GAB1(Y627)	p-STAT3(Y705)	0.077925
p-STAT3(Y705)	p-GAB1(Y627)	0.077925
p-CDK2(T160)	p-CDC2(Y15)	0.0778392
p-EGFR(Y845)	p-P70S6K(T421/S424)	0.0773798
p-P70S6K(T421/S424)	p-EGFR(Y845)	0.0773798
p-MTOR(S2448)	p-MEK(1/2)(S217/221)	0.0762935
p-MEK(1/2)(S217/221)	p-MTOR(S2448)	0.0762935
p-GAB2(S159)	p-ERK1/2(T202/Y204)	0.0739798
p-ERK1/2(T202/Y204)	p-GAB2(S159)	0.0739798
p-PKCPAN/G(T514)	p-PKCD(T505)	0.0738286
p-PKCD(T505)	p-PKCPAN/G(T514)	0.0738286
p-ERK1/2(T202/Y204)	p-MET(Y1349)	0.0735514
p-MET(Y1349)	p-ERK1/2(T202/Y204)	0.0735514
p-P90RSK(S380)	p-ZAP70(Y319)/SYK(Y352)	0.0727326
p-ZAP70(Y319)/SYK(Y352)	p-P90RSK(S380)	0.0727326
p-IRS1(S1101)	p-ERK1/2(T202/Y204)	0.0721913
p-ERK1/2(T202/Y204)	p-IRS1(S1101)	0.0721913
p-4EBP1(S65)	p-IGF1RB(Y1135/1136)/INSRB	0.0720497
p-IGF1RB(Y1135/1136)/INSRB	p-4EBP1(S65)	0.0720497
p-SHC(Y239/240)	p-EGFR(Y1068)	0.0718742
p-EGFR(Y1086)	p-ERK1/2(T202/Y204)	0.0717182
p-ERK1/2(T202/Y204)	p-EGFR(Y1086)	0.0717182
p-EGFR(Y845)	p-IGF1RB(Y1135/1136)/INSRB	0.0716977
p-IGF1RB(Y1135/1136)/INSRB	p-EGFR(Y845)	0.0716977
p-EGFR(Y845)	p-JAK1(Y1022/1023)	0.0713929
p-JAK1(Y1022/1023)	p-EGFR(Y845)	0.0713929
p-CRKII(Y221)	p-PDGFRA(Y754)	0.071092
p-PDGFRA(Y754)	p-CRKII(Y221)	0.071092
p-AKT(S473)	p-GSK3A(S21)	0.0710763
p-GSK3A(S21)	p-AKT(S473)	0.0710763
p-CDK2(T160)	p-PKCD(T505)	0.0709148
p-P38MAPK(T180/Y182)	p-STAT3(Y705)	0.0709031
p-STAT3(Y705)	p-P38MAPK(T180/Y182)	0.0709031
p-ERK1/2(T202/Y204)	p-PTEN(S380)	0.0709021
p-PTEN(S380)	p-ERK1/2(T202/Y204)	0.0709021
p-CRKII(Y221)	p-SYK(Y525/526)	0.0708437
p-SYK(Y525/526)	p-CRKII(Y221)	0.0708437
p-PDGFRB(Y1009)	p-S6RIBPROT(S240/244)	0.0707835
p-S6RIBPROT(S240/244)	p-PDGFRB(Y1009)	0.0707835
p-GAB1(Y627)	p-PDK1(S241)	0.0707662
p-PDK1(S241)	p-GAB1(Y627)	0.0707662
p-FOXO1(S319)/FOXO4(S262)	p-P90RSK(S380)	0.070674
p-MET(Y1234/1235)	p-SHC(Y239/240)	0.0706202
p-SHC(Y239/240)	p-MET(Y1234/1235)	0.0706202
p-SAPK/JNK(T183/Y185)	p-SRC(Y416)	0.0702801
p-SRC(Y416)	p-SAPK/JNK(T183/Y185)	0.0702801
p-GAB1(Y627)	p-STAT5(Y694)	0.0699948
p-STAT5(Y694)	p-GAB1(Y627)	0.0699948
p-P38MAPK(T180/Y182)	p-PDGFRB(Y1009)	0.0696839
p-PDGFRB(Y1009)	p-P38MAPK(T180/Y182)	0.0696839
p-SAPK/JNK(T183/Y185)	p-RAF(C-)(S259)	0.069524
p-CDC2(Y15)	p-PKCPAN/G(T514)	0.0691792
p-PKCPAN/G(T514)	p-CDC2(Y15)	0.0691792
p-PKCD(T505)	p-STAT3(Y705)	0.0690448
p-STAT3(Y705)	p-PKCD(T505)	0.0690448
p-GSK3A(S21)	p-SHC(Y239/240)	0.0688802
p-SHC(Y239/240)	p-GSK3A(S21)	0.0688802
p-FOXO3A(S253)	p-IGF1RB(Y1135/1136)/INSRB	0.0688241
p-IGF1RB(Y1135/1136)/INSRB	p-FOXO3A(S253)	0.0688241
p-ABL(C-)(Y245)	p-PDFGRA(Y849)/PDGFRB(Y857)	0.0685688
p-PDFGRA(Y849)/PDGFRB(Y857)	p-ABL(C-)(Y245)	0.0685688
p-GSK3A(S21)	p-PTEN(S380)	0.0678001
p-PTEN(S380)	p-GSK3A(S21)	0.0678001
p-RAF(C-)(S338)	p-STAT3(S727)	0.0670762
p-STAT3(S727)	p-RAF(C-)(S338)	0.0670762
p-EGFR(Y845)	p-ERBB4(Y1284)	0.0669797
p-ERBB4(Y1284)	p-EGFR(Y845)	0.0669797
p-CRKII(Y221)	p-P70S6K(T421/S424)	0.0669382
p-CRKII(Y221)	p-PI3KP85(Y458)P55(Y199)	0.0666267
p-PI3KP85(Y458)P55(Y199)	p-CRKII(Y221)	0.0666267
p-CRKII(Y221)	p-MET(Y1234/1235)	0.0656146
p-MET(Y1234/1235)	p-CRKII(Y221)	0.0656146
p-RAF(C-)(S338)	p-SHC(Y239/240)	0.0655383
p-SHC(Y239/240)	p-RAF(C-)(S338)	0.0655383
p-GSK3A(S21)	p-PLCG1(Y783)	0.0655298
p-PLCG1(Y783)	p-GSK3A(S21)	0.0655298
p-RAF(C-)(S338)	p-STAT3(Y705)	0.0652336
p-STAT3(Y705)	p-RAF(C-)(S338)	0.0652336
p-MEK(1/2)(S217/221)	p-MET(Y1234/1235)	0.0651307
p-MET(Y1234/1235)	p-MEK(1/2)(S217/221)	0.0651307
p-EGFR(Y845)	p-4EBP1(S65)	0.0649936
p-4EBP1(S65)	p-EGFR(Y845)	0.0649936
p-PDGFRA(Y754)	p-PLCG1(Y783)	0.0648651
p-PLCG1(Y783)	p-PDGFRA(Y754)	0.0648651
p-ERBB4(Y1284)	p-MTOR(S2448)	0.0648561
p-MTOR(S2448)	p-ERBB4(Y1284)	0.0648561
p-STAT5(Y694)	p-EGFR(Y1068)	0.0647252
p-ERBB4(Y1284)	p-GAB1(Y627)	0.0641999
p-GAB1(Y627)	p-ERBB4(Y1284)	0.0641999
p-EGFR(Y845)	p-ERK1/2(T202/Y204)	0.0639884
p-ERK1/2(T202/Y204)	p-EGFR(Y845)	0.0639884
p-MEK(1/2)(S217/221)	p-SYK(Y525/526)	0.0637304
p-SYK(Y525/526)	p-MEK(1/2)(S217/221)	0.0637304
p-EGFR(Y845)	p-P38MAPK(T180/Y182)	0.0637074
p-P38MAPK(T180/Y182)	p-EGFR(Y845)	0.0637074
p-ABL(C-)(Y245)	p-FGFR1(Y653/654)	0.0636384
p-FGFR1(Y653/654)	p-ABL(C-)(Y245)	0.0636384
p-4EBP1(T37/46)	p-PDK1(S241)	0.0635379
p-PDK1(S241)	p-4EBP1(T37/46)	0.0635379
p-ABL(C-)(Y245)	p-4EBP1(T37/46)	0.0635296
p-4EBP1(T37/46)	p-ABL(C-)(Y245)	0.0635296
p-PDGFRA(Y754)	p-P70S6K(T421/S424)	0.0633824
p-P70S6K(T421/S424)	p-PDGFRA(Y754)	0.0633824
p-GAB1(Y627)	p-JAK1(Y1022/1023)	0.0632462
p-JAK1(Y1022/1023)	p-GAB1(Y627)	0.0632462
p-ERBB4(Y1284)	p-STAT1(Y701)	0.0628622
p-STAT1(Y701)	p-ERBB4(Y1284)	0.0628622
p-ABL(C-)(Y245)	p-PLCG2(Y759)	0.062696
p-PLCG2(Y759)	p-ABL(C-)(Y245)	0.062696
p-AKT(S473)	p-GAB1(Y627)	0.0620618
p-GAB1(Y627)	p-AKT(S473)	0.0620618
p-GAB1(Y627)	p-ZAP70(Y319)/SYK(Y352)	0.0619154
p-ZAP70(Y319)/SYK(Y352)	p-GAB1(Y627)	0.0619154
p-ERBB2(Y1221/1222)	p-PLCG1(Y783)	0.0617873
p-PLCG1(Y783)	p-ERBB2(Y1221/1222)	0.0617873
p-CRKII(Y221)	p-P38MAPK(T180/Y182)	0.0607491
p-P38MAPK(T180/Y182)	p-CRKII(Y221)	0.0607491
p-CRKL(Y207)	p-IRS1(S1101)	0.0604792
p-IRS1(S1101)	p-CRKL(Y207)	0.0604792
p-MEK(1/2)(S217/221)	p-SRC(Y416)	0.060384
p-SRC(Y416)	p-MEK(1/2)(S217/221)	0.060384
p-CRKII(Y221)	p-IRS1(S1101)	0.0603181
p-IRS1(S1101)	p-CRKII(Y221)	0.0603181
p-FOXO1(S319)/FOXO4(S262)	p-RAF(C-)(S338)	0.0603131
p-RAF(C-)(S338)	p-FOXO1(S319)/FOXO4(S262)	0.0603131
p-ERK1/2(T202/Y204)	p-PDK1(S241)	0.0603022
p-PDK1(S241)	p-ERK1/2(T202/Y204)	0.0603022
p-SRC(Y416)	p-ZAP70(Y319)/SYK(Y352)	0.0599645
p-ZAP70(Y319)/SYK(Y352)	p-SRC(Y416)	0.0599645
p-RAF(C-)(S338)	p-S6RIBPROT(S240/244)	0.0595824
p-S6RIBPROT(S240/244)	p-RAF(C-)(S338)	0.0595824
p-IRS1(S1101)	p-MET(Y1349)	0.0594818
p-MET(Y1349)	p-IRS1(S1101)	0.0594818
p-MET(Y1349)	p-FAK(Y576/577)	0.0594267
p-FAK(Y576/577)	p-MET(Y1349)	0.0594267
p-SAPK/JNK(T183/Y185)	p-S6RIBPROT(S240/244)	0.0593543
p-S6RIBPROT(S240/244)	p-SAPK/JNK(T183/Y185)	0.0593543
p-SHP2(Y542)	p-SRC(Y527)	0.0590811
p-SRC(Y527)	p-SHP2(Y542)	0.0590811
p-PI3KP85(Y458)P55(Y199)	p-PLCG1(Y783)	0.0590757
p-PLCG1(Y783)	p-PI3KP85(Y458)P55(Y199)	0.0590757
p-MTOR(S2448)	p-RAF(C-)(S338)	0.0590708
p-RAF(C-)(S338)	p-MTOR(S2448)	0.0590708
p-EGFR(Y1173)	p-PI3KP85(Y458)P55(Y199)	0.0577221
p-PI3KP85(Y458)P55(Y199)	p-EGFR(Y1173)	0.0577221
p-GAB1(Y627)	p-IGF1RB(Y1135/1136)/INSRB	0.0569256
p-IGF1RB(Y1135/1136)/INSRB	p-GAB1(Y627)	0.0569256
p-PLCG1(Y783)	p-S6RIBPROT(S240/244)	0.0568281
p-S6RIBPROT(S240/244)	p-PLCG1(Y783)	0.0568281
p-GSK3A(S21)	p-P38MAPK(T180/Y182)	0.0567016
p-P38MAPK(T180/Y182)	p-GSK3A(S21)	0.0567016
p-MTOR(S2448)	p-PLCG2(Y759)	0.0566647
p-PLCG2(Y759)	p-MTOR(S2448)	0.0566647
p-FOXO3A(S253)	p-GAB1(Y627)	0.0566417
p-GAB1(Y627)	p-FOXO3A(S253)	0.0566417
p-PTEN(S380)	p-EGFR(Y845)	0.0564926
p-MTOR(S2448)	p-STAT5(Y694)	0.0555141
p-STAT5(Y694)	p-MTOR(S2448)	0.0555141
p-KIT(C-)(Y719)	p-FAK(Y576/577)	0.0554393
p-KIT(C-)(Y719)	p-CDC2(Y15)	0.0554074
p-4EBP1(S65)	p-PDFGRA(Y849)/PDGFRB(Y857)	0.0549213
p-PDFGRA(Y849)/PDGFRB(Y857)	p-4EBP1(S65)	0.0549213
p-EGFR(Y1173)	p-4EBP1(T37/46)	0.054698
p-4EBP1(T37/46)	p-EGFR(Y1173)	0.054698
p-MTOR(S2448)	p-STAT1(Y701)	0.0546422
p-STAT1(Y701)	p-MTOR(S2448)	0.0546422
p-SAPK/JNK(T183/Y185)	p-PDFGRA(Y849)/PDGFRB(Y857)	0.054096
p-PDFGRA(Y849)/PDGFRB(Y857)	p-SAPK/JNK(T183/Y185)	0.054096
p-MEK(1/2)(S217/221)	p-SAPK/JNK(T183/Y185)	0.0534486
p-SAPK/JNK(T183/Y185)	p-MEK(1/2)(S217/221)	0.0534486
p-FOXO3A(S253)	p-ERK1/2(T202/Y204)	0.0533745
p-ERK1/2(T202/Y204)	p-FOXO3A(S253)	0.0533745
p-KIT(C-)(Y719)	p-GAB1(Y627)	0.0530103
p-CREB(S133)	p-SRC(Y416)	0.0522289
p-SRC(Y416)	p-CREB(S133)	0.0522289
p-PKCD(T505)	p-STAT1(Y701)	0.0517213
p-STAT1(Y701)	p-PKCD(T505)	0.0517213
p-CREB(S133)	p-EGFR(Y1173)	0.0517037
p-EGFR(Y1173)	p-CREB(S133)	0.0517037
p-CDC2(Y15)	p-MET(Y1349)	0.0516137
p-MET(Y1349)	p-CDC2(Y15)	0.0516137
p-ERBB2(Y1221/1222)	p-PDGFRB(Y1009)	0.0515821
p-PDGFRB(Y1009)	p-ERBB2(Y1221/1222)	0.0515821
p-IGF1RB(Y1135/1136)/INSRB	p-SHC(Y239/240)	0.0512337
p-SHC(Y239/240)	p-IGF1RB(Y1135/1136)/INSRB	0.0512337
p-GAB2(S159)	p-STAT3(S727)	0.0510362
p-STAT3(S727)	p-GAB2(S159)	0.0510362
p-MET(Y1349)	p-PKCD(T505)	0.0510234
p-PKCD(T505)	p-MET(Y1349)	0.0510234
p-FOXO1(S319)/FOXO4(S262)	p-IRS1(S1101)	0.0508693
p-IRS1(S1101)	p-FOXO1(S319)/FOXO4(S262)	0.0508693
p-FOXO1(S319)/FOXO4(S262)	p-GSK3A(S21)	0.050724
p-GSK3A(S21)	p-FOXO1(S319)/FOXO4(S262)	0.050724
p-PTEN(S380)	p-STAT3(S727)	0.0505718
p-STAT3(S727)	p-PTEN(S380)	0.0505718
p-SAPK/JNK(T183/Y185)	p-PI3KP85(Y458)P55(Y199)	0.0505629
p-PI3KP85(Y458)P55(Y199)	p-SAPK/JNK(T183/Y185)	0.0505629
p-PKCD(T505)	p-RAF(C-)(S259)	0.0504786
p-RAF(C-)(S259)	p-PKCD(T505)	0.0504786
p-ERBB4(Y1284)	p-PLCG1(Y783)	0.0503815
p-PLCG1(Y783)	p-ERBB4(Y1284)	0.0503815
p-4EBP1(T37/46)	p-SRC(Y416)	0.0501444
p-SRC(Y416)	p-4EBP1(T37/46)	0.0501444
p-CRKII(Y221)	p-SRC(Y416)	0.0496037
p-SRC(Y416)	p-CRKII(Y221)	0.0496037
p-ABL(C-)(Y245)	p-SRC(Y416)	0.049548
p-SRC(Y416)	p-ABL(C-)(Y245)	0.049548
p-PTEN(S380)	p-SHP2(Y542)	0.0493869
p-SHP2(Y542)	p-PTEN(S380)	0.0493869
p-ABL(C-)(Y245)	p-STAT6(Y641)	0.0488467
p-STAT6(Y641)	p-ABL(C-)(Y245)	0.0488467
p-4EBP1(T37/46)	p-STAT3(Y705)	0.0486652
p-STAT3(Y705)	p-4EBP1(T37/46)	0.0486652
p-P38MAPK(T180/Y182)	p-MET(Y1349)	0.0486593
p-MET(Y1349)	p-P38MAPK(T180/Y182)	0.0486593
p-CRKII(Y221)	p-PKCPAN/G(T514)	0.0484108
p-PKCPAN/G(T514)	p-CRKII(Y221)	0.0484108
p-4EBP1(S65)	p-PYK2(Y402)	0.0484086
p-PYK2(Y402)	p-4EBP1(S65)	0.0484086
p-SHC(Y239/240)	p-SYK(Y525/526)	0.0481837
p-SYK(Y525/526)	p-SHC(Y239/240)	0.0481837
p-JAK1(Y1022/1023)	p-PDGFRB(Y1009)	0.0481095
p-PDGFRB(Y1009)	p-JAK1(Y1022/1023)	0.0481095
p-FOXO1(S319)/FOXO4(S262)	p-PDGFRA(Y754)	0.0473727
p-PDGFRA(Y754)	p-FOXO1(S319)/FOXO4(S262)	0.0473727
p-PDGFRA(Y754)	p-PLCG2(Y759)	0.0473526
p-PLCG2(Y759)	p-PDGFRA(Y754)	0.0473526
p-IGF1RB(Y1135/1136)/INSRB	p-ERK1/2(T202/Y204)	0.0471964
p-ERK1/2(T202/Y204)	p-IGF1RB(Y1135/1136)/INSRB	0.0471964
p-PI3KP85(Y458)P55(Y199)	p-FAK(Y576/577)	0.0471755
p-FAK(Y576/577)	p-PI3KP85(Y458)P55(Y199)	0.0471755
p-MET(Y1349)	p-STAT6(Y641)	0.0470697
p-STAT6(Y641)	p-MET(Y1349)	0.0470697
p-EGFR(Y1086)	p-PDGFRA(Y754)	0.0470468
p-PDGFRA(Y754)	p-EGFR(Y1086)	0.0470468
p-4EBP1(T37/46)	p-SHP2(Y542)	0.046956
p-GAB2(S159)	p-PI3KP85(Y458)P55(Y199)	0.0465863
p-PI3KP85(Y458)P55(Y199)	p-GAB2(S159)	0.0465863
p-P38MAPK(T180/Y182)	p-STAT1(Y701)	0.0463017
p-STAT1(Y701)	p-P38MAPK(T180/Y182)	0.0463017
p-ERBB2(Y1221/1222)	p-GSK3A(S21)	0.0462843
p-GSK3A(S21)	p-ERBB2(Y1221/1222)	0.0462843
p-P38MAPK(T180/Y182)	p-PYK2(Y402)	0.0462154
p-PYK2(Y402)	p-P38MAPK(T180/Y182)	0.0462154
p-SRC(Y527)	p-PKCD(T505)	0.0457097
p-SRC(Y527)	p-STAT3(S727)	0.0455767
p-STAT3(S727)	p-SRC(Y527)	0.0455767
p-FOXO3A(S253)	p-P90RSK(S380)	0.045454
p-P90RSK(S380)	p-FOXO3A(S253)	0.045454
p-MTOR(S2448)	p-P70S6K(T421/S424)	0.0452639
p-P70S6K(T421/S424)	p-MTOR(S2448)	0.0452639
p-JAK1(Y1022/1023)	p-PI3KP85(Y458)P55(Y199)	0.0451548
p-PI3KP85(Y458)P55(Y199)	p-JAK1(Y1022/1023)	0.0451548
p-SAPK/JNK(T183/Y185)	p-PYK2(Y402)	0.0449473
p-PYK2(Y402)	p-SAPK/JNK(T183/Y185)	0.0449473
p-EGFR(Y1173)	p-PDGFRA(Y754)	0.0446265
p-PDGFRA(Y754)	p-EGFR(Y1173)	0.0446265
p-GAB1(Y627)	p-PKCPAN/G(T514)	0.0445147
p-PKCPAN/G(T514)	p-GAB1(Y627)	0.0445147
p-ERBB4(Y1284)	p-PDK1(S241)	0.0444943
p-PDK1(S241)	p-ERBB4(Y1284)	0.0444943
p-CDC2(Y15)	p-CRKL(Y207)	0.043933
p-CRKL(Y207)	p-CDC2(Y15)	0.043933
p-4EBP1(S65)	p-MET(Y1349)	0.0436805
p-MET(Y1349)	p-4EBP1(S65)	0.0436805
p-KIT(C-)(Y719)	p-IRS1(S1101)	0.0431828
p-MTOR(S2448)	p-JAK1(Y1022/1023)	0.0430317
p-JAK1(Y1022/1023)	p-MTOR(S2448)	0.0430317
p-PDK1(S241)	p-PKCPAN/G(T514)	0.042799
p-PKCPAN/G(T514)	p-PDK1(S241)	0.042799
p-CRKII(Y221)	p-PLCG1(Y783)	0.0423018
p-PLCG1(Y783)	p-CRKII(Y221)	0.0423018
p-PDGFRB(Y1009)	p-SHC(Y239/240)	0.0422066
p-SHC(Y239/240)	p-PDGFRB(Y1009)	0.0422066
p-IRS1(S1101)	p-SAPK/JNK(T183/Y185)	0.0420748
p-SAPK/JNK(T183/Y185)	p-IRS1(S1101)	0.0420748
p-ERK1/2(T202/Y204)	p-RAF(C-)(S338)	0.0420492
p-RAF(C-)(S338)	p-ERK1/2(T202/Y204)	0.0420492
p-PLCG1(Y783)	p-FAK(Y576/577)	0.0420016
p-FAK(Y576/577)	p-PLCG1(Y783)	0.0420016
p-IGF1RB(Y1135/1136)/INSRB	p-P38MAPK(T180/Y182)	0.0419586
p-P38MAPK(T180/Y182)	p-IGF1RB(Y1135/1136)/INSRB	0.0419586
p-S6RIBPROT(S240/244)	p-STAT3(S727)	0.0416135
p-STAT3(S727)	p-S6RIBPROT(S240/244)	0.0416135
p-MET(Y1349)	p-STAT1(Y701)	0.0413057
p-STAT1(Y701)	p-MET(Y1349)	0.0413057
p-ERK1/2(T202/Y204)	p-STAT3(Y705)	0.0412784
p-STAT3(Y705)	p-ERK1/2(T202/Y204)	0.0412784
p-CDC2(Y15)	p-FAK(Y576/577)	0.041235
p-FAK(Y576/577)	p-CDC2(Y15)	0.041235
p-FOXO1(S319)/FOXO4(S262)	p-PKCD(T505)	0.0410817
p-PKCD(T505)	p-FOXO1(S319)/FOXO4(S262)	0.0410817
p-GAB1(Y627)	p-STAT3(S727)	0.0408006
p-STAT3(S727)	p-GAB1(Y627)	0.0408006
p-PI3KP85(Y458)P55(Y199)	p-SRC(Y416)	0.0407279
p-SRC(Y416)	p-PI3KP85(Y458)P55(Y199)	0.0407279
p-JAK1(Y1022/1023)	p-SRC(Y416)	0.0407159
p-SRC(Y416)	p-JAK1(Y1022/1023)	0.0407159
p-PI3KP85(Y458)P55(Y199)	p-STAT6(Y641)	0.0404511
p-STAT6(Y641)	p-PI3KP85(Y458)P55(Y199)	0.0404511
p-SHC(Y239/240)	p-SRC(Y416)	0.0399167
p-SRC(Y416)	p-SHC(Y239/240)	0.0399167
p-EGFR(Y1068)	p-ERBB2(Y1221/1222)	0.0397455
p-ERBB2(Y1221/1222)	p-EGFR(Y1068)	0.0397455
p-CRKII(Y221)	p-PLCG2(Y759)	0.0396403
p-PLCG2(Y759)	p-CRKII(Y221)	0.0396403
p-EGFR(Y1173)	p-MEK(1/2)(S217/221)	0.0396316
p-MEK(1/2)(S217/221)	p-EGFR(Y1173)	0.0396316
p-EGFR(Y1173)	p-SAPK/JNK(T183/Y185)	0.0395545
p-SAPK/JNK(T183/Y185)	p-EGFR(Y1173)	0.0395545
p-P38MAPK(T180/Y182)	p-SRC(Y416)	0.0388682
p-SRC(Y416)	p-P38MAPK(T180/Y182)	0.0388682
p-P38MAPK(T180/Y182)	p-STAT5(Y694)	0.0387807
p-STAT5(Y694)	p-P38MAPK(T180/Y182)	0.0387807
p-IGF1RB(Y1135/1136)/INSRB	p-MEK(1/2)(S217/221)	0.038722
p-MEK(1/2)(S217/221)	p-IGF1RB(Y1135/1136)/INSRB	0.038722
p-EGFR(Y1086)	p-MTOR(S2448)	0.0386652
p-MTOR(S2448)	p-EGFR(Y1086)	0.0386652
p-EGFR(Y1068)	p-IGF1RB(Y1135/1136)/INSRB	0.0386159
p-IGF1RB(Y1135/1136)/INSRB	p-EGFR(Y1068)	0.0386159
p-PLCG1(Y783)	p-SHC(Y239/240)	0.0377037
p-SHC(Y239/240)	p-PLCG1(Y783)	0.0377037
p-AKT(S473)	p-STAT3(S727)	0.0375732
p-STAT3(S727)	p-AKT(S473)	0.0375732
p-CRKL(Y207)	p-SHP2(Y542)	0.0374915
p-SHP2(Y542)	p-CRKL(Y207)	0.0374915
p-PDGFRA(Y754)	p-PYK2(Y402)	0.0374847
p-PYK2(Y402)	p-PDGFRA(Y754)	0.0374847
p-CDC2(Y15)	p-PDGFRB(Y1009)	0.0373722
p-PDGFRB(Y1009)	p-CDC2(Y15)	0.0373722
p-4EBP1(S65)	p-ERBB4(Y1284)	0.0369767
p-ERBB4(Y1284)	p-4EBP1(S65)	0.0369767
p-PDFGRA(Y849)/PDGFRB(Y857)	p-RAF(C-)(S338)	0.0366698
p-RAF(C-)(S338)	p-PDFGRA(Y849)/PDGFRB(Y857)	0.0366698
p-EGFR(Y1173)	p-JAK1(Y1022/1023)	0.0365869
p-JAK1(Y1022/1023)	p-EGFR(Y1173)	0.0365869
p-EGFR(Y1173)	p-SHC(Y239/240)	0.0363895
p-SHC(Y239/240)	p-EGFR(Y1173)	0.0363895
p-JAK1(Y1022/1023)	p-MEK(1/2)(S217/221)	0.0363746
p-MEK(1/2)(S217/221)	p-JAK1(Y1022/1023)	0.0363746
p-MTOR(S2448)	p-STAT6(Y641)	0.036293
p-STAT6(Y641)	p-MTOR(S2448)	0.036293
p-MEK(1/2)(S217/221)	p-STAT6(Y641)	0.0358533
p-STAT6(Y641)	p-MEK(1/2)(S217/221)	0.0358533
p-FOXO3A(S253)	p-MEK(1/2)(S217/221)	0.0357606
p-MEK(1/2)(S217/221)	p-FOXO3A(S253)	0.0357606
p-ERBB2(Y1221/1222)	p-STAT5(Y694)	0.035674
p-STAT5(Y694)	p-ERBB2(Y1221/1222)	0.035674
p-GAB2(S159)	p-JAK1(Y1022/1023)	0.0355264
p-JAK1(Y1022/1023)	p-GAB2(S159)	0.0355264
p-IGF1RB(Y1135/1136)/INSRB	p-PDK1(S241)	0.0354184
p-PDK1(S241)	p-IGF1RB(Y1135/1136)/INSRB	0.0354184
p-PKCPAN/G(T514)	p-PTEN(S380)	0.0352682
p-PTEN(S380)	p-PKCPAN/G(T514)	0.0352682
p-PKCD(T505)	p-SHP2(Y542)	0.035101
p-SHP2(Y542)	p-PKCD(T505)	0.035101
p-CRKL(Y207)	p-PDK1(S241)	0.0343485
p-PDK1(S241)	p-CRKL(Y207)	0.0343485
p-SAPK/JNK(T183/Y185)	p-STAT3(S727)	0.0340971
p-STAT3(S727)	p-SAPK/JNK(T183/Y185)	0.0340971
p-MEK(1/2)(S217/221)	p-PDGFRA(Y754)	0.0339979
p-PDGFRA(Y754)	p-MEK(1/2)(S217/221)	0.0339979
p-4EBP1(T37/46)	p-PI3KP85(Y458)P55(Y199)	0.0334031
p-PI3KP85(Y458)P55(Y199)	p-4EBP1(T37/46)	0.0334031
p-PLCG1(Y783)	p-STAT3(S727)	0.0331303
p-STAT3(S727)	p-PLCG1(Y783)	0.0331303
p-P38MAPK(T180/Y182)	p-SHP2(Y542)	0.0330437
p-SHP2(Y542)	p-P38MAPK(T180/Y182)	0.0330437
p-MTOR(S2448)	p-SRC(Y527)	0.0328224
p-SRC(Y527)	p-MTOR(S2448)	0.0328224
p-MET(Y1349)	p-PDFGRA(Y849)/PDGFRB(Y857)	0.0326989
p-PDFGRA(Y849)/PDGFRB(Y857)	p-MET(Y1349)	0.0326989
p-AKT(S473)	p-PTEN(S380)	0.0326065
p-PTEN(S380)	p-AKT(S473)	0.0326065
p-4EBP1(T37/46)	p-RAF(C-)(S338)	0.0325259
p-RAF(C-)(S338)	p-4EBP1(T37/46)	0.0325259
p-CRKL(Y207)	p-4EBP1(T37/46)	0.0325082
p-4EBP1(T37/46)	p-CRKL(Y207)	0.0325082
p-CDC2(Y15)	p-STAT3(Y705)	0.0325021
p-STAT3(Y705)	p-CDC2(Y15)	0.0325021
p-CDC2(Y15)	p-STAT6(Y641)	0.0324903
p-STAT6(Y641)	p-CDC2(Y15)	0.0324903
p-SRC(Y527)	p-IRS1(S1101)	0.0324424
p-GSK3A(S21)	p-SRC(Y527)	0.0323775
p-SRC(Y527)	p-GSK3A(S21)	0.0323775
p-FOXO3A(S253)	p-PLCG1(Y783)	0.0323282
p-PLCG1(Y783)	p-FOXO3A(S253)	0.0323282
p-CREB(S133)	p-PLCG1(Y783)	0.0321609
p-PLCG1(Y783)	p-CREB(S133)	0.0321609
p-FGFR1(Y653/654)	p-RAF(C-)(S338)	0.0321254
p-RAF(C-)(S338)	p-FGFR1(Y653/654)	0.0321254
p-PDGFRA(Y754)	p-STAT1(Y701)	0.0320119
p-STAT1(Y701)	p-PDGFRA(Y754)	0.0320119
p-FOXO3A(S253)	p-FAK(Y576/577)	0.0319927
p-FAK(Y576/577)	p-FOXO3A(S253)	0.0319927
p-CDC2(Y15)	p-EGFR(Y1086)	0.0317828
p-EGFR(Y1086)	p-CDC2(Y15)	0.0317828
p-FOXO3A(S253)	p-RAF(C-)(S338)	0.0316927
p-RAF(C-)(S338)	p-FOXO3A(S253)	0.0316927
p-EGFR(Y845)	p-SHC(Y239/240)	0.0316088
p-SHC(Y239/240)	p-EGFR(Y845)	0.0316088
p-GAB2(S159)	p-P70S6K(T421/S424)	0.0314744
p-P70S6K(T421/S424)	p-GAB2(S159)	0.0314744
p-CRKII(Y221)	p-STAT6(Y641)	0.0312429
p-STAT6(Y641)	p-CRKII(Y221)	0.0312429
p-MEK(1/2)(S217/221)	p-ZAP70(Y319)/SYK(Y352)	0.0311208
p-ZAP70(Y319)/SYK(Y352)	p-MEK(1/2)(S217/221)	0.0311208
p-PDGFRA(Y754)	p-SHC(Y239/240)	0.0309205
p-SHC(Y239/240)	p-PDGFRA(Y754)	0.0309205
p-EGFR(Y1173)	p-P70S6K(T421/S424)	0.0301608
p-P70S6K(T421/S424)	p-EGFR(Y1173)	0.0301608
p-FGFR1(Y653/654)	p-P38MAPK(T180/Y182)	0.0300177
p-P38MAPK(T180/Y182)	p-FGFR1(Y653/654)	0.0300177
p-JAK1(Y1022/1023)	p-PKCPAN/G(T514)	0.0299046
p-PKCPAN/G(T514)	p-JAK1(Y1022/1023)	0.0299046
p-ERK1/2(T202/Y204)	p-SRC(Y527)	0.0291555
p-SRC(Y527)	p-ERK1/2(T202/Y204)	0.0291555
p-CDC2(Y15)	p-EGFR(Y845)	0.0287085
p-EGFR(Y845)	p-CDC2(Y15)	0.0287085
p-MTOR(S2448)	p-S6RIBPROT(S240/244)	0.0286077
p-S6RIBPROT(S240/244)	p-MTOR(S2448)	0.0286077
p-PDGFRA(Y754)	p-PTEN(S380)	0.0286044
p-PTEN(S380)	p-PDGFRA(Y754)	0.0286044
p-GAB2(S159)	p-PKCPAN/G(T514)	0.0284158
p-PKCPAN/G(T514)	p-GAB2(S159)	0.0284158
p-JAK1(Y1022/1023)	p-RAF(C-)(S259)	0.0280173
p-RAF(C-)(S259)	p-JAK1(Y1022/1023)	0.0280173
p-MTOR(S2448)	p-ZAP70(Y319)/SYK(Y352)	0.0277348
p-ZAP70(Y319)/SYK(Y352)	p-MTOR(S2448)	0.0277348
p-CDC2(Y15)	p-SRC(Y416)	0.0274236
p-SRC(Y416)	p-CDC2(Y15)	0.0274236
p-MTOR(S2448)	p-MET(Y1234/1235)	0.0270344
p-MET(Y1234/1235)	p-MTOR(S2448)	0.0270344
p-PKCD(T505)	p-STAT5(Y694)	0.026923
p-STAT5(Y694)	p-PKCD(T505)	0.026923
p-PI3KP85(Y458)P55(Y199)	p-PYK2(Y402)	0.0268886
p-PYK2(Y402)	p-PI3KP85(Y458)P55(Y199)	0.0268886
p-CREB(S133)	p-PKCD(T505)	0.0265367
p-PKCD(T505)	p-CREB(S133)	0.0265367
p-4EBP1(T37/46)	p-P90RSK(S380)	0.0262388
p-P90RSK(S380)	p-4EBP1(T37/46)	0.0262388
p-4EBP1(S65)	p-CRKII(Y221)	0.0261606
p-SAPK/JNK(T183/Y185)	p-PLCG2(Y759)	0.0261351
p-PLCG2(Y759)	p-SAPK/JNK(T183/Y185)	0.0261351
p-PLCG1(Y783)	p-PKCPAN/G(T514)	0.0259529
p-PKCPAN/G(T514)	p-PLCG1(Y783)	0.0259529
p-CRKII(Y221)	p-MTOR(S2448)	0.0258599
p-MTOR(S2448)	p-CRKII(Y221)	0.0258599
p-EGFR(Y1086)	p-IGF1RB(Y1135/1136)/INSRB	0.0258121
p-IGF1RB(Y1135/1136)/INSRB	p-EGFR(Y1086)	0.0258121
p-CDK2(T160)	p-ERBB2(Y1221/1222)	0.0257979
p-ERBB2(Y1221/1222)	p-CDK2(T160)	0.0257979
p-FOXO3A(S253)	p-STAT5(Y694)	0.0253729
p-STAT5(Y694)	p-FOXO3A(S253)	0.0253729
p-ERBB2(Y1221/1222)	p-MTOR(S2448)	0.0249814
p-MTOR(S2448)	p-ERBB2(Y1221/1222)	0.0249814
p-SAPK/JNK(T183/Y185)	p-PKCD(T505)	0.0249308
p-PKCD(T505)	p-SAPK/JNK(T183/Y185)	0.0249308
p-EGFR(Y1068)	p-PDGFRA(Y754)	0.0245974
p-PDGFRA(Y754)	p-EGFR(Y1068)	0.0245974
p-ERK1/2(T202/Y204)	p-STAT5(Y694)	0.0245235
p-STAT5(Y694)	p-ERK1/2(T202/Y204)	0.0245235
p-4EBP1(S65)	p-RAF(C-)(S338)	0.0245031
p-RAF(C-)(S338)	p-4EBP1(S65)	0.0245031
p-FOXO3A(S253)	p-SHC(Y239/240)	0.0242899
p-SHC(Y239/240)	p-FOXO3A(S253)	0.0242899
p-ERBB2(Y1221/1222)	p-PI3KP85(Y458)P55(Y199)	0.0237163
p-PI3KP85(Y458)P55(Y199)	p-ERBB2(Y1221/1222)	0.0237163
p-PKCD(T505)	p-STAT3(S727)	0.0228478
p-STAT3(S727)	p-PKCD(T505)	0.0228478
p-PKCD(T505)	p-SYK(Y525/526)	0.0226598
p-SYK(Y525/526)	p-PKCD(T505)	0.0226598
p-CDK2(T160)	p-PDK1(S241)	0.0224822
p-4EBP1(S65)	p-JAK1(Y1022/1023)	0.0223864
p-CDK2(T160)	p-IRS1(S1101)	0.0221043
p-IRS1(S1101)	p-CDK2(T160)	0.0221043
p-MTOR(S2448)	p-PDFGRA(Y849)/PDGFRB(Y857)	0.0217782
p-PDFGRA(Y849)/PDGFRB(Y857)	p-MTOR(S2448)	0.0217782
p-ABL(C-)(Y245)	p-SYK(Y525/526)	0.021618
p-SYK(Y525/526)	p-ABL(C-)(Y245)	0.021618
p-IGF1RB(Y1135/1136)/INSRB	p-PDFGRA(Y849)/PDGFRB(Y857)	0.0215207
[truncated: 206 more rows]
